# Supplementary material for: Identification of biomarkers related to CD8+ T cell infiltration with gene co-expression network in clear cell renal cell carcinoma
Source: publisher site journal article supplement (doi:10.18632/aging.102841), 2020-02-20
Supplement: Supplementary file [file aging-v12i4-102841-supplementary-material-SD1.pdf]

## SUPPLEMENTARY FIGURES

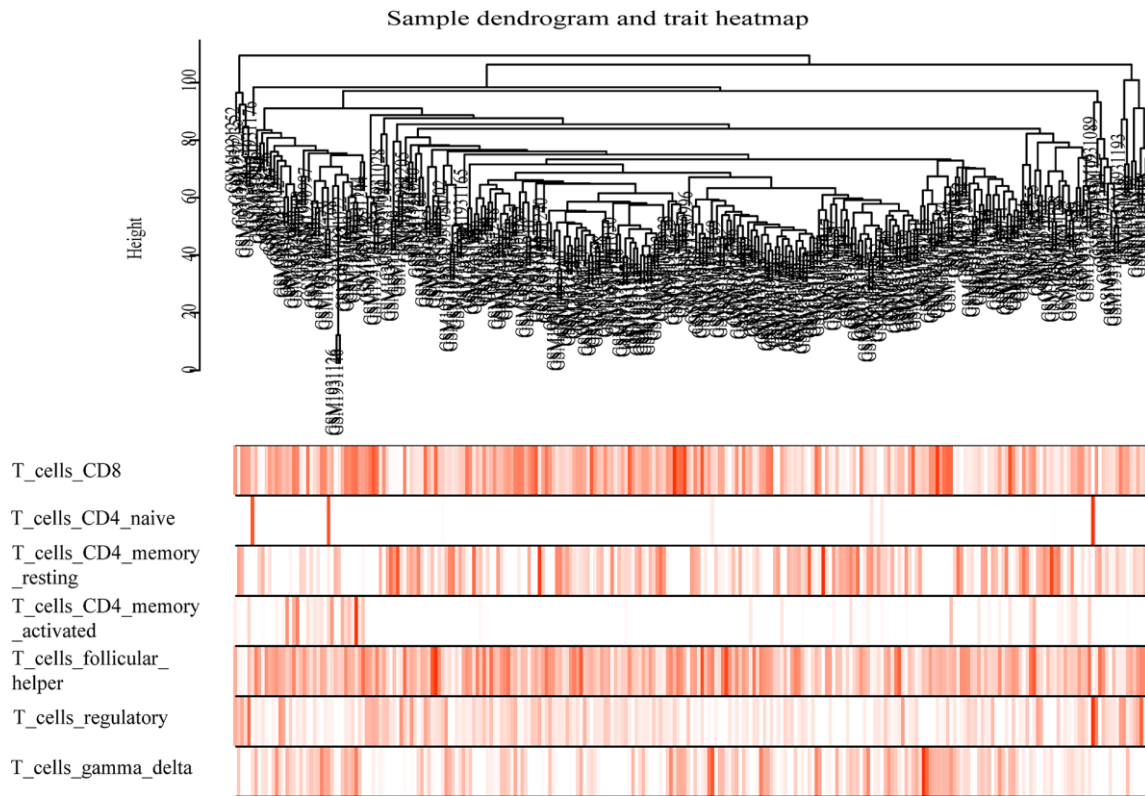

**Supplementary Figure 1. Sample clustering (GSE73731): sample dendrogram and trait indicator.** In the heat map, the darker the color, the higher the degree of infiltration of the seven kinds of T cells.

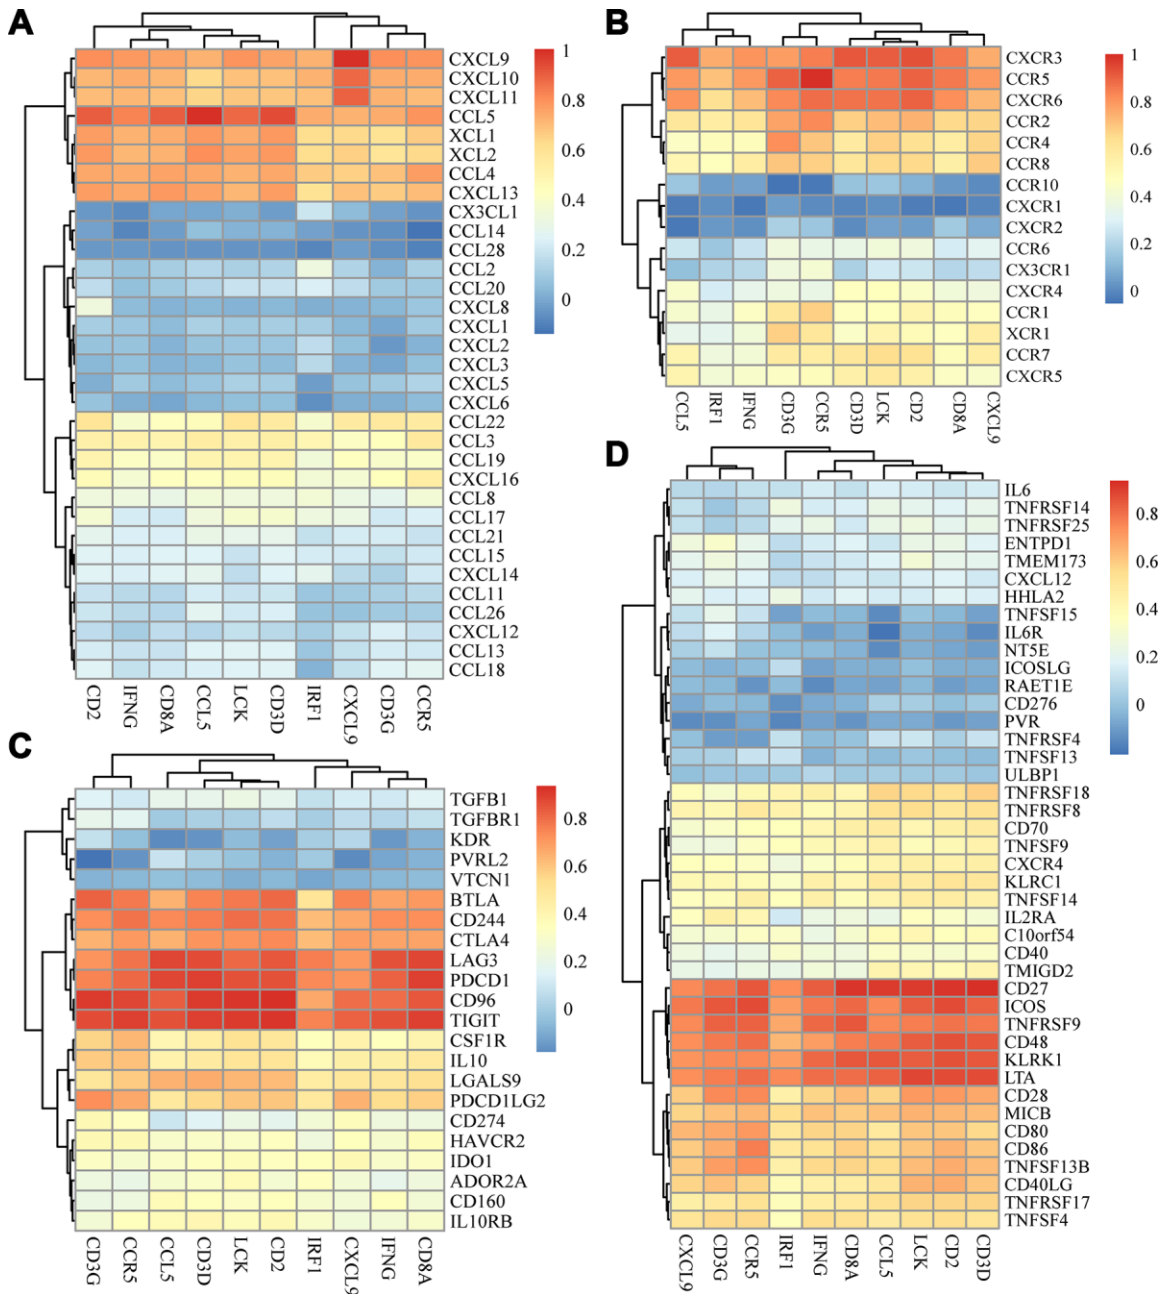

**Supplementary Figure 2. Heat map of the correlation between immune factors and hub genes. (A) Chemokines. (B) Receptors. (C) Immune-inhibitory factors. (D) Immune-stimulatory factors.**
