# Supplementary material for: Identification of biomarkers related to CD8+ T cell infiltration with gene co-expression network in clear cell renal cell carcinoma
Source: publisher site journal article supplement (doi:10.18632/aging.102841), 2020-02-20
Supplement: Supplementary file [file aging-v12i4-102841-supplementary-material-SD5.pdf]

**Supplementary Table 4. The result of differential analysis of gene expression between normal tissue and tumor tissue by R package “limma”.**

| <b>Gene</b> | <b>logFC</b> | <b>AveExpr</b> | <b>t</b> | <b>P.Value</b> | <b>adj.P.Val</b> | <b>B</b> |
|-------------|--------------|----------------|----------|----------------|------------------|----------|
| CCL5        | 2.761844     | 4.760074       | 16.69318 | 8.34E-52       | 1.82E-50         | 106.7216 |
| CD2         | 2.28705      | 3.233462       | 15.32089 | 4.60E-45       | 7.75E-44         | 91.25291 |
| CXCL9       | 2.625227     | 3.859447       | 13.8642  | 3.42E-38       | 4.27E-37         | 75.49697 |
| CD3D        | 2.063852     | 2.945952       | 13.82764 | 5.04E-38       | 6.23E-37         | 75.11169 |
| CCR5        | 1.667775     | 2.207914       | 13.2961  | 1.32E-35       | 1.44E-34         | 69.57093 |
| CD8A        | 2.076911     | 2.644136       | 12.42316 | 9.51E-32       | 8.71E-31         | 60.73685 |
| CD3G        | 1.022994     | 1.294262       | 10.84224 | 3.62E-25       | 2.40E-24         | 45.68733 |
| IRF1        | 0.899948     | 3.35192        | 8.877243 | 7.60E-18       | 3.42E-17         | 28.98526 |
| LCK         | 0.966669     | 2.169819       | 8.614633 | 6.00E-17       | 2.55E-16         | 26.94321 |
| IFNG        | 0.555027     | 0.53599        | 6.865693 | 1.63E-11       | 5.02E-11         | 14.62135 |
