# Supplementary material for: Identification of biomarkers related to CD8+ T cell infiltration with gene co-expression network in clear cell renal cell carcinoma
Source: Aging (Albany NY). 2020 Feb 20;12(4):3694–712. doi: 10.18632/aging.102841 (PMC7066925; doi:10.18632/aging.102841)
Supplement: Supplementary Table 1 [file aging-12-102841-s006..xlsx]

## Sheet: Supplementary Table 1
Supplementary Table 1. Gene expression matrix for constructing gene co-expression network.
ID	GSM1930996	GSM1930997	GSM1930998	GSM1930999	GSM1931000	GSM1931001	GSM1931002	GSM1931003	GSM1931004	GSM1931005	GSM1931006	GSM1931007	GSM1931008	GSM1931009	GSM1931010	GSM1931011	GSM1931012	GSM1931013	GSM1931014	GSM1931015	GSM1931016	GSM1931017	GSM1931018	GSM1931019	GSM1931020	GSM1931021	GSM1931022	GSM1931023	GSM1931024	GSM1931025	GSM1931026	GSM1931027	GSM1931028	GSM1931029	GSM1931030	GSM1931031	GSM1931032	GSM1931033	GSM1931034	GSM1931035	GSM1931036	GSM1931037	GSM1931038	GSM1931039	GSM1931040	GSM1931041	GSM1931042	GSM1931043	GSM1931044
FGG	8.54302	4.44881	3.66748	5.9492	12.3798	4.18897	3.75566	11.04	3.53424	3.59168	11.1695	3.66795	3.60648	3.62738	3.64279	13.005	5.0725	11.5293	7.934	4.03003	13.4266	5.45339	4.87253	3.59961	4.7667	7.63457	3.78325	4.59152	11.8103	3.72076	4.07917	3.72098	13.1459	3.6593	6.51883	3.61953	3.99178	3.80481	6.05155	3.711	5.59823	3.53887	3.70388	3.7713	3.69288	10.5333	3.67656	3.74215	3.54778
FGB	7.0555	5.39884	4.27671	4.50827	10.8758	5.21132	4.29742	11.5988	3.87806	3.81334	10.686	3.91764	4.04832	4.13008	3.96762	12.3798	4.67864	10.6715	12.3975	4.19725	12.5629	10.0244	3.99033	3.89324	8.28188	5.14032	3.93261	4.83937	10.7921	4.51856	4.68106	4.20094	12.5082	4.3555	4.78542	4.49785	3.82219	3.88672	5.13532	4.05948	5.74279	6.58057	3.88499	4.02836	3.85984	10.1462	4.03513	4.28215	3.92148
XIST	6.54199	3.90529	3.74123	10.0331	3.76651	3.81136	3.79678	3.64256	3.78416	8.38833	10.1561	9.89371	3.68755	6.79628	4.07704	4.19303	3.92356	3.68942	4.10438	3.72584	3.72215	3.79999	3.70388	8.68992	3.66114	9.31023	9.54901	3.98446	9.93577	10.0378	3.73869	9.44951	9.45638	8.44264	3.98365	9.75148	3.82436	9.6522	3.76043	4.08669	3.83832	10.1536	3.77717	10.335	4.09788	3.88653	9.29301	3.80633	3.82544
SLC13A1	5.15407	3.02253	2.98304	2.98227	3.12243	6.83122	4.49248	2.89325	3.22869	8.30485	3.0083	5.38646	2.89449	3.61715	6.1574	4.65282	3.01993	6.12549	3.02317	8.42134	3.04144	3.3352	3.33398	2.90916	3.19119	3.46163	6.14818	4.95444	9.90193	7.98723	3.59939	5.24237	3.58216	7.36517	3.28389	5.29481	3.79657	5.03335	3.38527	4.72165	3.00968	2.88637	8.24367	3.17068	3.00754	3.47098	3.92167	9.71795	7.66446
C8orf22	3.81007	4.54049	3.67048	6.9028	10.621	3.80244	3.72007	3.63211	4.15582	3.48927	3.6841	4.02732	3.50203	3.66887	3.37821	3.97334	3.55173	3.73198	3.67094	4.09564	6.76244	3.32675	10.1859	3.86438	4.14043	8.89102	3.96658	6.34346	3.74145	3.57703	5.67786	3.88313	3.79999	3.64374	6.59632	3.6623	8.97943	3.6649	4.70548	4.61088	4.68683	3.71522	4.0341	4.31712	3.76518	4.91375	4.08628	4.26137	4.14472
GC	3.54446	3.15544	3.08773	3.3519	3.36003	9.46619	8.03668	3.16575	3.27636	9.76972	3.38557	6.0713	3.16948	3.22936	3.7442	3.88437	5.6075	7.6153	4.18713	10.5269	7.73287	3.16989	3.28618	3.56409	3.22359	3.21004	5.43881	3.50695	10.5018	3.8399	3.9324	3.96619	4.43393	5.83544	3.34328	7.07393	3.30812	3.93736	7.06685	3.32244	3.61953	3.55053	7.55126	3.16453	3.30967	4.73086	3.35584	11.3894	10.0959
CXCL6	3.19847	6.99776	6.79597	4.08406	3.2388	3.72215	3.18932	10.0935	5.48127	3.48612	3.07715	3.28154	3.4135	3.33906	4.42212	10.3752	3.17386	3.97165	3.47071	3.30661	5.6745	4.95158	3.72675	3.60159	7.37117	8.21756	6.1832	4.59957	3.15292	6.30149	3.78857	4.59642	6.59968	4.69475	3.12199	3.95509	3.65543	3.69426	3.87566	3.08467	3.84534	3.12513	3.64088	3.8964	3.12844	6.11732	3.68595	3.24881	3.7611
SST	4.1171	6.69572	3.86372	4.33445	6.12165	4.43227	5.2584	3.93054	5.11214	4.71832	4.00848	11.7986	13.1162	5.55719	4.79189	4.8763	3.95076	6.00998	4.09215	4.1847	4.16207	4.10602	12.0457	4.53004	4.35156	4.45957	8.81175	4.79675	4.5753	5.97796	5.50992	4.32898	4.13463	8.48644	4.93821	5.02844	4.14656	5.87062	4.27292	7.82023	4.35058	3.83241	4.38025	5.49786	4.02124	5.10329	12.8712	4.75111	5.22966
LOC102659288	8.91399	3.44695	3.39621	4.21642	8.51424	8.22231	6.4851	9.48775	5.65622	8.58149	3.27143	4.49045	3.33817	3.32643	6.74089	7.70776	9.4509	9.68099	8.67122	9.58983	7.05171	8.18531	7.06651	3.35434	7.9118	6.36247	3.1845	8.16181	9.1156	3.68128	9.18745	3.28618	9.36383	3.85922	7.89123	3.842	8.70164	6.14519	8.77715	8.52433	6.05128	9.09613	8.59337	3.48187	3.25706	7.60809	3.31701	9.35854	9.69629
PTHLH	7.80831	5.96938	3.70337	7.27858	7.2647	9.08258	7.22724	7.36093	4.14532	3.66347	9.21156	6.1914	3.74645	3.56514	4.99883	9.13438	3.57658	4.67001	3.54285	8.20577	9.6157	6.61666	6.00307	3.29186	3.65067	8.02964	3.99139	3.71592	6.37641	3.32153	5.80138	4.06929	8.89181	3.88585	3.51894	3.41265	3.75497	5.78581	8.86122	4.70003	7.7765	9.37629	3.57504	8.05615	3.9561	7.81451	3.29886	3.75143	3.59243
CXCL13	3.75862	8.58974	4.84694	3.79932	3.45522	5.35076	4.43455	10.4958	4.60541	3.51611	6.16657	6.53187	3.45467	3.37997	5.50852	9.619	6.54111	3.82827	6.87468	7.70642	4.23628	7.31619	3.83086	3.72052	4.50525	3.97589	8.59056	5.69923	6.83988	3.27956	3.67985	3.32065	6.07302	4.17059	3.81664	3.48508	5.59372	3.51816	7.3432	5.25549	4.15641	9.46619	6.17623	11.1934	9.21519	3.75978	3.79284	8.01056	6.48681
PROM1	4.62716	7.80225	8.25827	11.1253	6.89518	9.04101	7.57838	3.33247	6.21776	3.61109	3.60744	3.84985	6.55326	8.38187	5.14943	4.01411	3.53707	11.2295	3.65859	6.60025	10.9755	8.83581	8.18643	7.81403	6.24795	10.0469	8.63019	10.1561	7.3594	8.79227	3.71802	3.43807	4.4801	7.57289	5.82263	10.9563	8.30485	3.66182	8.42462	8.24367	7.78541	3.55456	8.30609	3.97436	3.32304	7.11814	6.71595	9.05934	3.61085
PCK1	5.61218	8.79227	7.05918	8.72284	7.25041	9.92085	8.80742	3.58783	7.58419	11.6864	8.80573	9.91655	4.26015	3.84382	7.64689	5.2446	5.57847	10.7206	4.9691	9.40428	9.38879	4.48762	7.55419	5.41726	7.14481	7.75397	5.14571	10.1931	6.70575	7.45628	8.57278	5.02712	3.96251	11.1042	6.29494	11.1042	8.77631	8.42198	7.92242	6.72683	3.93157	7.20065	11.1695	3.77938	3.5002	7.34084	4.0288	10.1198	10.7998
IL20RB	4.14959	5.27185	8.81344	5.17932	7.50995	4.49331	4.04296	9.37061	5.411	4.50808	9.19075	4.61718	3.81511	3.97714	4.6462	6.76097	9.51701	4.48961	10.9069	8.63318	7.24972	4.43227	6.34728	4.47135	4.88774	6.01167	6.21776	4.01367	8.088	4.13621	4.4235	4.46989	4.34446	3.8848	4.49185	3.74736	7.85663	4.18734	10.0244	5.38033	5.11458	11.0501	4.44366	6.93196	5.85295	10.7921	4.42638	9.0941	4.78856
FABP7	4.74417	3.54285	3.53525	5.44018	6.94853	3.46462	3.52126	6.14544	9.98663	4.38876	4.20869	10.9024	3.68246	3.62975	10.4341	10.1223	3.71918	8.52306	3.58291	6.69542	9.90401	6.65872	10.1223	3.64682	3.85902	6.87084	3.5442	8.44264	9.00964	3.66887	9.87542	6.99088	3.52381	9.05833	3.86324	4.60126	8.97084	9.89371	9.6708	6.199	8.7806	10.2453	4.73902	3.79908	3.5893	6.21725	4.36352	8.89699	3.56742
MMP1	5.28471	4.39595	3.99514	7.30097	5.98592	5.42374	4.0855	7.07862	6.96635	5.40964	11.426	6.9925	3.86111	3.87189	4.79041	3.67024	4.99565	5.615	5.3925	5.20553	8.51757	4.59665	4.08365	3.23321	4.46909	9.5214	6.64388	4.36771	5.79438	3.32065	5.92718	4.04504	5.38968	3.94491	9.67413	5.22567	3.44031	3.52284	5.03901	5.96354	3.30436	5.73986	3.37967	5.73674	10.0611	5.91916	3.26448	3.44141	4.88923
MMP12	3.47736	9.05507	3.56256	4.81069	3.36628	4.25246	4.35372	7.41141	3.84556	3.58059	4.55371	3.44636	5.01418	3.65907	3.44751	5.47507	4.92926	3.86869	9.15946	5.72956	9.38041	3.68058	5.65622	3.47312	4.13173	7.10992	9.87929	3.82936	6.60322	3.53399	3.59243	3.59394	7.34475	3.52988	4.05705	3.6326	7.34775	3.48823	8.37871	3.80766	3.99432	5.83428	3.5525	4.16064	4.46521	6.2367	3.73291	3.50441	3.62786
AKR1B10	4.21457	4.22413	5.73172	4.27009	5.76497	4.11462	4.15761	4.77435	4.52848	4.08386	4.39118	4.20094	4.33988	5.66264	3.76835	10.8594	4.48155	3.97126	4.9279	4.41511	4.71976	4.28573	12.7369	5.07138	4.11262	5.01333	4.17159	4.43084	4.28954	7.98998	6.99776	4.34911	5.7217	4.20012	4.231	4.05667	4.52057	9.58983	9.24833	3.85178	4.5407	3.91787	4.4844	4.01451	4.88543	4.57677	4.45272	4.72207	4.4239
LOC613266	3.535	3.79376	3.37908	8.50654	10.5597	3.34686	3.49511	4.17548	3.34951	3.31239	7.85079	3.56135	3.55349	3.57334	3.41985	3.90777	8.10349	3.74761	3.58882	3.69491	8.16525	4.93442	3.25111	3.75885	3.58435	3.5563	9.20575	3.65996	3.49356	4.15663	3.48953	3.9763	9.20575	3.5525	3.74145	3.6399	3.49119	3.61691	4.1388	3.40597	5.18557	3.5689	3.82827	7.79737	3.75656	7.26357	3.59746	3.56916	3.61109
LOC101060391	3.44973	4.10035	3.63701	3.61427	8.54013	3.84272	3.70245	5.88174	3.63098	3.61691	3.99265	3.47442	3.58164	3.47925	4.15821	10.0221	8.81929	5.24825	6.84604	9.66909	3.8083	5.13031	6.6758	3.48692	3.75566	3.53375	4.48299	3.78188	6.97407	7.21392	4.33931	3.8195	9.64708	3.38115	4.2121	4.58542	3.62975	3.60744	8.49731	5.16757	3.80654	4.83599	3.55582	3.52479	3.51894	5.39483	3.55801	4.76398	3.28618
C10orf99	3.88718	4.91094	3.74669	3.89452	7.73833	4.07999	4.13898	3.99329	5.03708	3.96678	10.5082	4.29033	4.01756	4.1177	4.01156	7.85563	7.20736	7.17051	4.60085	6.34805	3.9559	7.76954	4.32563	4.28775	7.14126	4.31634	3.93653	6.51066	3.92441	4.37076	6.65458	4.70003	7.14646	4.05627	4.53656	3.99789	4.03634	4.1488	5.3934	9.21748	9.32693	7.96311	4.78708	3.98885	3.77962	8.65588	3.94301	6.88423	8.35552
AOC1	10.0633	8.20056	5.83833	6.34831	11.7413	10.3212	9.02221	3.85089	5.6075	11.426	7.99444	6.13584	4.07664	7.46199	10.583	10.3045	3.6473	11.142	5.40644	12.3975	8.3316	10.3158	9.6157	3.7442	5.78003	9.0941	7.22229	10.0702	12.1621	10.5797	9.83009	8.27342	11.752	11.7986	8.19829	9.35854	10.7281	5.57217	10.8758	9.50633	6.92767	3.85133	12.2139	5.53612	3.71146	11.6969	3.71729	11.8981	10.6142
SLC2A2	5.66101	3.28421	8.58823	3.29478	4.65805	6.41952	4.23527	6.91512	3.95076	7.12343	4.56833	6.5457	3.13034	3.16008	6.53627	4.09564	8.38122	6.42406	3.89913	4.48401	5.10352	4.08911	4.12318	8.55537	3.85731	5.53919	4.77813	4.54887	6.20117	6.54985	6.95012	6.95566	6.68986	7.30514	3.98843	3.5563	4.14919	8.03342	4.02815	4.78856	4.09973	10.0288	6.30711	3.30594	3.30502	4.67143	5.77735	8.31306	5.68209
TSPAN8	4.36971	6.73703	6.97374	9.63395	4.8717	5.58455	4.20627	3.91998	3.53272	3.86304	3.98013	4.21702	4.67184	8.32603	4.00782	3.8821	3.85408	4.32237	3.46603	4.31152	10.7475	3.8915	5.76761	3.71983	3.44361	3.62389	3.45686	7.33279	9.78257	4.05135	3.97247	4.39337	6.83184	7.75636	4.45086	10.9613	5.40298	3.96658	4.9787	4.68213	6.85972	9.30272	4.3281	3.76043	3.78701	4.6864	4.25443	7.1276	4.41607
MSLN	4.05586	3.83262	3.65067	3.77871	4.12098	3.60085	4.02577	4.07299	3.5317	3.99472	3.64279	3.78325	3.78878	3.85408	3.67353	3.80923	3.69403	5.22341	3.61427	3.96782	4.37137	4.06548	8.17538	3.667	5.24085	4.52678	5.54749	4.71543	4.14818	5.16185	3.77399	3.66252	3.85089	4.66271	4.61278	5.40116	7.3386	3.52529	3.89475	3.74894	3.94221	6.73337	3.77826	3.88123	3.89193	5.20488	3.85603	3.91787	5.07891
LGALS4	4.71995	4.63728	4.64081	10.2688	5.02278	5.35888	4.88923	4.3545	4.33812	5.2082	4.98041	5.10018	4.42638	4.56172	11.4721	4.68062	4.70528	7.6933	4.52335	5.34934	11.2107	6.58537	9.33475	4.58726	4.45107	4.37721	5.0783	6.24185	9.48929	4.73628	8.10121	5.00414	4.54007	4.63602	7.57289	5.09643	4.62469	8.92993	4.18631	5.18299	7.54836	5.81148	8.41038	4.64355	4.16226	4.67963	4.29152	4.48921	4.93291
DNER	4.16483	7.03217	4.04212	3.46603	4.40477	3.83726	3.74327	9.62251	3.55173	3.66561	3.26145	3.63653	3.76152	9.53817	3.27111	4.5605	4.29306	5.4092	4.05667	4.10841	4.22328	3.53912	3.77962	3.84155	3.32706	4.85549	4.15502	5.29569	3.47949	4.48498	4.01156	3.5031	8.07907	5.11086	3.81974	7.59264	3.83194	3.56539	5.25226	3.52579	3.85069	9.58356	3.33877	5.50014	4.14938	4.74006	8.90588	3.57212	3.70223
CNTN3	3.3182	4.29525	3.88782	4.29033	6.85099	6.30094	7.52429	3.15674	3.27205	3.11969	3.37077	3.35076	7.02547	7.44398	2.93566	4.94349	3.05719	3.78458	3.27729	5.16607	7.08604	4.66271	3.37908	8.26074	3.59556	3.19432	3.53325	5.82562	6.24264	5.97675	2.97349	3.22831	3.0212	5.51316	3.13218	7.06586	3.55004	3.02588	5.50223	3.22505	7.14685	2.93355	3.1381	2.96438	5.47987	4.58604	6.4497	5.37397	3.12844
PTX3	3.68271	9.40428	5.74875	3.83769	3.50441	4.00432	4.28513	6.38717	4.40499	3.55326	6.27251	3.60794	3.62146	3.33189	3.86952	4.01534	6.96863	3.98216	6.11184	4.96135	5.50662	3.73384	3.77288	3.80335	6.53383	8.46243	5.74326	5.977	5.02884	3.63942	5.00482	5.25639	4.93843	4.43899	3.30628	7.27416	4.74336	3.41433	6.02116	4.3015	4.79718	5.07571	4.30555	4.36752	8.68909	4.17304	5.11566	3.23106	3.55173
REN	5.7985	6.77086	6.59687	4.30613	5.05205	5.58715	4.8383	6.63321	4.4654	6.50555	7.28702	8.22936	4.52295	4.54887	9.30148	5.63335	6.21155	5.01184	8.26494	5.19484	4.29803	4.43455	8.55913	6.23346	7.14753	6.41679	4.40518	9.84558	4.9562	4.18132	5.3755	5.44753	5.87638	8.44052	8.17943	4.43738	5.10174	10.8931	6.5966	5.76042	5.04669	4.46143	13.1162	4.20973	5.7117	4.63602	4.97782	4.7175	5.09775
PVALB	4.11671	4.56213	4.00805	4.16798	4.08569	3.95951	12.2862	5.04624	3.82392	3.98216	4.10055	3.79127	12.6776	7.73657	3.79284	4.24415	3.99704	3.79632	4.05031	4.1396	4.27529	3.76496	4.42921	4.48698	3.73562	4.17928	4.30108	5.81525	5.62659	4.12862	4.01775	4.16562	8.1309	6.40649	4.14656	7.78927	3.99574	3.96471	3.85282	3.80418	8.27043	3.85731	3.98384	4.78296	3.81906	4.56974	11.9388	3.88103	3.91306
USP9Y	3.08141	3.84425	6.94228	3.21961	4.8901	7.47828	6.80125	7.14126	5.9487	3.21154	3.19081	3.11493	3.94702	3.46081	6.15308	7.64732	7.17291	5.67786	6.63065	4.52641	7.71765	6.79876	8.0945	3.33308	6.03797	3.17468	3.04941	6.1351	3.1354	3.23568	7.35148	3.14733	3.12748	3.12602	5.67024	3.11493	6.89903	3.14691	5.624	7.66843	7.2548	3.2651	4.76297	3.10911	4.71976	4.58174	3.08141	7.72308	5.17461
HLA-DQA1	9.30529	5.31538	4.95421	5.43795	10.0657	4.8717	4.90102	5.27975	5.31167	5.3207	9.11992	5.44817	8.36134	9.53359	4.64702	5.35954	5.1691	11.2049	5.00259	5.57642	4.94184	11.3274	5.05205	8.80914	10.7875	5.55373	5.699	9.32031	10.7998	8.74059	5.05054	5.16541	9.44386	9.63227	5.35467	8.77044	5.15833	10.4593	5.37462	5.67855	9.95038	5.00662	5.50875	5.70422	5.15989	5.12945	9.1156	5.57802	5.57802
UMOD	7.07393	4.7225	5.90781	4.65622	4.3479	6.73183	6.11985	4.20869	6.45739	4.30087	4.48401	4.21841	5.17281	4.34871	4.66599	4.09703	4.4559	4.65599	4.65864	4.21457	4.2703	4.51346	4.18092	4.54971	4.20292	4.32769	4.38917	12.1778	4.2221	4.90923	4.53822	7.44586	4.31572	12.9224	4.96437	13.8726	4.54585	4.47282	4.24974	6.32424	4.67046	4.21601	4.77435	4.51116	4.88105	4.39215	4.6943	4.62903	4.50026
IGDCC4	5.30063	4.9901	7.76418	5.06714	8.15785	4.32483	4.12576	8.15901	7.6856	3.36865	6.17045	4.00805	4.4219	6.78411	3.76877	5.96579	5.16031	5.76352	9.61073	4.84343	4.02963	4.34341	3.7521	5.08041	6.84816	4.81783	6.57498	4.39977	7.06453	6.22547	4.27971	3.46576	5.31119	3.65233	4.07011	4.15882	4.55541	3.6866	6.80612	3.89871	5.69731	9.92935	3.35584	8.8805	8.21756	7.97942	8.24252	3.47736	3.39082
LINC01127	4.40321	4.41471	4.13173	5.48034	8.83581	5.87249	4.53779	6.54111	6.98684	3.67239	8.05198	4.31172	3.98592	3.87828	3.65352	7.01566	9.37197	7.9008	10.4894	5.80164	6.53683	6.24366	5.43928	3.93519	8.81929	8.74309	7.38119	7.73474	4.3728	3.99616	7.35603	4.34668	4.92564	4.34216	5.03335	5.32756	8.5444	4.2489	7.05137	7.32456	6.62409	4.52577	6.30912	5.28293	4.44188	9.21275	3.96555	3.98782	4.31133
TMEM255A	5.04433	4.43022	3.53119	6.27797	5.53243	6.82292	7.17258	7.02706	4.91245	5.4624	4.80523	5.45339	9.09813	3.80314	4.21601	5.81525	4.89739	5.43881	3.75586	7.37007	4.46521	5.11501	3.61953	9.2719	8.15901	4.52398	6.843	5.1271	7.64689	7.25077	3.14032	3.25942	4.76774	4.34627	3.43414	4.20031	3.49009	3.74873	6.57248	5.67257	7.47911	3.04436	5.12595	4.47813	3.79976	6.59223	3.95905	6.33728	3.68386
SORCS3	3.97457	5.08363	3.27008	3.34805	8.04618	7.86353	6.20143	6.00678	5.81931	3.87081	7.87128	4.17766	3.34745	4.19325	3.68459	3.27654	3.54544	5.3475	8.28877	4.11626	3.24777	3.26309	5.41618	3.13586	7.46483	8.01941	3.42444	3.96638	3.83377	3.51583	5.17688	3.3489	7.16731	3.44636	3.43807	3.37296	5.09039	3.38557	4.47385	3.83286	5.51969	3.3173	3.31642	3.23949	3.17504	7.28627	3.26674	3.10385	3.3304
CHRDL1	4.44489	10.4743	8.0139	3.93285	8.98317	5.1275	4.46418	11.7872	5.78262	4.4547	4.33651	6.53683	4.40041	8.26789	4.05907	8.46974	9.93798	4.24713	4.62693	6.99977	4.25887	4.13758	6.83244	9.9338	4.70296	4.49145	7.31583	6.71174	7.67321	5.31331	4.3143	4.59979	9.48929	6.80399	4.15781	6.61461	7.58669	4.26261	8.10944	4.1435	9.36657	5.05986	4.18653	7.81504	4.59504	8.01505	9.15494	4.65723	4.25443
OLIG1	3.77627	3.52126	3.38617	4.61064	7.07862	7.39685	7.55294	3.677	3.41059	3.91764	3.7322	3.82412	8.21111	3.86974	3.50801	4.76937	7.55757	3.73452	3.3597	3.56514	5.53481	3.42365	8.70476	6.32108	6.82194	7.46793	3.7622	4.22577	5.16691	3.64971	6.10682	3.95822	7.44627	5.89871	3.51457	4.74254	3.5317	3.36519	5.68444	7.58419	3.64848	3.56742	3.48107	3.27205	3.79768	6.72744	4.11442	7.18427	3.68847
REG1A	11.6555	4.83475	6.53657	11.7629	11.142	7.55631	6.34754	4.40321	5.4913	8.95731	4.6729	6.84484	4.55761	4.39215	4.376	7.46639	6.18241	10.7015	4.44941	6.95208	10.8207	9.2719	8.43196	4.38004	4.44881	8.05421	4.33342	8.20937	9.59611	8.62722	4.96611	7.35603	7.62088	8.78965	6.53739	4.46343	10.3501	5.20553	8.0232	8.45782	5.73845	4.3353	4.74254	4.6191	4.23773	6.97506	4.40281	9.06042	6.06985
EIF1AY	3.28088	4.9948	7.58791	3.43839	4.48579	7.73966	7.43599	8.22113	6.46862	3.19695	3.39477	3.27891	3.60719	3.49329	6.33944	7.53317	7.21647	6.0451	7.18497	6.67404	7.70955	5.98266	8.34494	3.38148	6.05279	3.38907	3.3397	5.83616	3.47388	3.3069	7.92594	3.34563	3.48317	3.26448	6.37398	3.25011	7.15165	3.41641	5.48542	7.14232	6.28421	3.53835	4.96865	3.46516	5.45339	4.56631	3.39309	7.65337	5.3076
ACE2	8.14284	3.75372	3.63751	3.99854	7.83511	8.57792	7.21318	3.57334	5.48199	9.8774	4.01676	8.59412	3.65834	4.46102	9.30003	7.17678	3.61953	8.9187	3.57881	7.23448	4.21151	6.09219	7.38528	4.2349	5.57384	7.44437	5.18665	8.67362	8.43326	10.4283	6.92312	8.10455	6.73882	8.34615	5.66453	7.35787	7.05716	9.08144	6.09878	7.4567	4.20668	3.58342	10.3834	4.32665	3.50388	6.41513	6.01831	10.0046	9.98018
CYP4F3	4.71311	3.39973	3.48398	3.84493	8.41619	8.21279	6.73971	4.02795	4.05747	4.58768	7.52548	3.84031	3.41752	3.3637	3.90466	7.62217	4.06656	5.60056	5.46382	7.40645	6.60057	3.42605	5.10531	3.58954	3.6222	4.49536	4.16247	6.05587	4.40642	4.59789	4.79487	3.65996	5.67049	7.43966	3.3421	4.78359	4.59276	3.82784	8.74145	3.82153	4.96524	7.22581	3.47012	3.31146	3.47711	8.71027	3.71222	6.18801	5.4913
IL13RA2	4.62318	5.28985	4.78147	5.6261	5.69662	4.36752	3.68595	6.23694	4.76105	4.22048	7.00473	4.57449	3.65257	3.53525	3.99895	9.20803	4.65537	4.6174	3.92593	4.2284	6.61636	3.97393	3.76946	3.68503	4.92221	5.62517	9.03227	5.7623	4.62385	3.71267	4.38977	3.85709	4.07767	4.95421	4.18392	4.03209	4.85488	4.56567	8.44399	4.9414	4.14307	9.23772	5.0632	4.71188	4.53242	6.92348	3.83043	3.44891	4.61214
RPS4Y1	5.34586	9.75324	11.5212	5.18421	9.2069	12.3231	11.9535	11.9107	10.8501	4.90019	5.33045	4.8134	7.77791	5.95113	10.6002	11.7755	12.3058	10.1906	11.6864	10.7091	11.0937	11.1871	12.3231	4.78398	10.5204	5.18174	4.81719	10.7475	5.55408	5.08929	12.3418	5.2627	5.04329	5.03816	12.0457	4.76231	11.6079	4.95706	9.82217	11.7986	11.1934	5.30108	9.08977	5.51969	9.88149	8.82358	5.16408	10.9203	9.50937
INHBE	3.45937	7.4912	3.49511	3.51869	5.56563	3.66633	3.95674	3.61929	3.71313	3.48586	4.56994	3.30782	3.53221	3.3597	3.77018	3.72098	8.75766	3.62146	4.96307	4.39196	6.35921	3.25238	6.79508	3.55199	3.48317	5.46999	4.83434	3.13177	4.40948	3.60429	3.45741	3.35525	8.485	3.24303	3.17225	3.43528	3.71826	3.69965	6.0202	3.20109	3.08565	7.45513	3.83129	3.37091	4.50203	6.538	3.15884	5.06559	4.42108
MGARP	7.21026	4.00599	4.08138	3.96929	6.94228	4.52827	4.08469	4.14491	4.22917	9.00487	3.72328	6.96635	3.92746	5.42697	9.6173	5.05986	3.91525	8.70865	4.39956	3.96825	4.04464	4.25539	3.84815	4.09788	5.56255	5.73558	3.90321	4.7239	4.79321	4.07113	4.74987	6.63784	3.98549	6.68131	3.78303	4.34911	4.3689	9.17738	4.97067	5.26477	6.8785	3.88378	5.1139	3.69082	4.05448	4.67579	7.57962	4.63974	4.6756
MYH8	11.04	3.49144	3.56487	3.53193	6.08616	4.18208	3.60208	3.47041	3.40568	3.62975	3.54802	3.535	3.39309	3.43249	3.72881	3.36717	3.65449	6.91228	3.39745	3.43083	3.4258	3.5072	3.57162	4.06384	3.37878	4.8635	3.56183	3.45522	3.61858	7.64562	3.55076	3.51735	7.78834	4.82426	3.55199	5.45382	3.44581	3.61427	3.4602	3.47364	3.40285	3.48267	3.35909	3.45826	3.64112	3.48267	3.34863	3.29918	3.58135
ANXA3	3.90148	7.22044	5.9839	7.67022	4.1187	7.86976	8.60136	3.86783	4.66729	3.76043	3.36978	4.16758	7.35376	7.97055	6.26527	3.71497	7.40682	7.68005	3.43111	4.87954	3.98343	7.10105	4.45532	4.30972	5.44707	3.72835	6.07302	8.11671	7.68928	8.23114	5.30246	4.535	3.677	6.01638	5.7117	9.20126	4.60666	3.94405	7.56533	4.68334	6.33009	3.85963	4.43878	3.51658	3.98098	6.58848	5.86824	8.45782	3.63701
KISS1R	10.5863	4.72452	7.38191	11.4111	10.8035	10.4253	8.89699	6.92958	8.89181	11.1755	4.21518	9.13206	3.78036	3.94765	8.31796	5.08406	5.41189	10.9203	9.76589	6.65222	11.3894	5.9267	9.89593	3.80418	10.2348	10.9386	8.55913	10.0331	7.83703	3.74351	7.07526	9.46345	10.7051	4.00288	5.15878	4.86725	9.33201	7.91828	9.0067	9.5614	3.54778	4.58846	10.2111	4.81488	5.12945	10.3263	3.96493	4.27671	10.0244
SFRP2	4.11262	9.71972	6.06055	5.64044	5.84923	6.95531	6.81945	9.43282	12.4902	4.0402	4.28835	8.9689	6.85561	4.13173	4.4408	4.91607	4.47385	6.37721	6.28371	6.82916	6.40919	5.40024	6.2611	4.06322	8.98614	6.10884	4.44715	5.36384	9.09186	4.50827	5.01396	6.25978	4.18132	6.68773	7.70119	6.59223	9.51555	6.90981	8.63318	7.37575	10.0469	6.00477	4.21518	4.86518	4.31133	7.09427	4.13442	4.5266	4.46806
LRRC19	3.19503	3.04941	3.45303	3.61739	6.4176	7.91518	5.53525	3.34504	3.31239	7.17187	3.98198	5.10771	3.075	4.53884	5.13758	4.63956	3.37417	6.503	3.81841	6.32213	3.19581	3.59556	4.31634	3.20448	3.4152	3.24942	3.44725	5.18775	7.70955	6.99285	4.03573	4.52194	6.99451	6.36109	3.33337	7.17463	3.93587	5.28471	4.58035	3.25605	3.20707	3.23039	6.43926	3.25473	3.27008	6.52575	3.83661	8.20577	7.0068
LINC01139	4.98062	3.78036	3.57431	3.89281	7.58504	7.51277	6.58956	3.43952	7.15096	4.8495	3.32467	7.33096	3.34714	3.79236	3.33189	6.76815	3.58059	6.61199	3.41145	3.64516	6.59427	3.51529	4.89245	7.72083	6.41429	6.69309	6.49258	7.49337	3.366	4.50394	6.5236	4.14777	5.07595	7.23554	3.29314	5.20863	4.65947	7.42278	5.74637	6.04361	4.11075	3.26674	3.49749	3.4071	3.84922	6.15131	6.44478	4.57736	3.45686
SCN3A	3.93825	3.56086	3.76741	7.56993	3.24704	3.58342	3.70713	6.39731	3.6521	3.27143	3.27374	3.21887	4.7802	3.49775	3.22469	4.93035	2.97112	3.47312	4.8635	3.74507	4.06101	3.12554	3.32401	3.51946	3.31849	3.34355	3.56691	4.16899	3.42634	3.69239	3.20256	3.43442	4.8696	3.68435	3.31551	5.02822	3.3274	3.15844	3.71449	3.22319	7.89075	3.07133	3.16252	4.05806	3.66323	3.27729	4.11648	3.09749	3.02655
BCHE	3.25706	6.80787	3.18617	3.15501	3.76152	3.42014	3.28521	3.99812	3.49409	5.53525	3.92894	4.48822	3.13305	6.39652	4.07073	5.21132	3.60475	3.19011	3.14778	3.2474	4.10341	3.25042	3.39393	3.21628	5.94477	3.52023	3.44031	3.61614	3.56282	7.66535	3.55607	4.19992	6.59603	4.36292	3.37587	4.54133	5.54916	4.05113	2.99429	3.47633	5.97895	7.43169	3.53424	3.12471	4.17345	4.06846	3.34594	2.94256	3.66252
AZGP1	3.33999	3.46546	3.72628	3.57408	6.88984	6.74391	8.35875	3.40285	5.72835	8.73015	3.70545	5.96677	7.79026	3.7442	6.8785	7.01161	3.64848	5.09596	5.09709	8.76722	4.12201	3.65302	5.82791	3.33666	5.20553	5.1517	3.83769	6.53101	5.63635	7.11955	6.08321	6.56993	5.51338	8.24493	4.46102	6.72535	6.71387	6.49903	4.61383	5.90437	3.92996	8.99202	8.91297	3.64848	3.59868	6.54316	3.21742	6.81856	8.69209
LBP	6.19191	4.68294	4.61888	4.77185	7.72714	4.60853	4.49227	4.42555	6.21877	4.21518	9.82819	4.46223	4.57614	4.75663	4.50827	5.19421	5.28581	4.3585	7.33474	6.66681	8.27342	4.77125	6.40538	4.32462	5.09086	10.0513	7.36054	4.32875	6.11057	4.50606	4.76211	4.33791	11.1361	4.52377	5.57337	4.62903	4.23651	4.45629	5.22296	4.36252	5.46382	4.68372	4.62736	4.54701	4.94034	8.89346	4.86392	4.79282	5.94695
SLC5A12	5.47706	3.16908	3.24439	3.31939	3.17698	6.92381	5.04329	3.07231	3.43275	6.89774	3.44082	4.85876	3.16372	3.14823	6.81637	3.83399	3.21704	6.21855	3.05886	6.22471	3.84857	4.32156	5.41213	3.22761	4.14615	4.15326	4.14919	6.66622	6.69399	3.50801	5.37221	4.57016	3.85603	6.49369	3.92684	3.89067	5.27232	5.72835	3.8852	4.86031	3.31335	3.21556	6.46472	3.53375	3.27374	3.32982	3.2409	6.00829	6.5288
ACSM2A	7.78975	3.51683	4.73256	5.57265	9.77497	8.23668	6.64845	3.37033	6.65575	10.1173	6.00829	8.20463	3.21961	5.33976	10.5966	8.29873	3.75885	7.88081	3.31642	9.42423	6.06629	7.49722	8.21165	10.9158	5.33115	7.67112	7.16657	8.78469	9.93157	10.9519	9.19881	7.70517	8.56351	11.0771	6.72979	6.70842	6.86433	9.19308	6.11279	9.50153	8.14629	3.3519	9.25199	4.97393	3.19011	6.57442	7.79838	9.31786	10.2111
CXCL11	3.48692	5.17888	4.55012	3.37504	3.73562	4.7038	3.61789	6.06805	5.09062	4.70087	3.75414	7.31433	3.54825	3.10619	3.41752	6.6178	3.7485	4.73279	3.81598	4.96352	3.48027	7.1624	3.70604	3.41872	4.50952	4.53374	8.71344	4.83851	6.46969	3.13264	5.08929	4.15366	4.02058	4.42231	3.7458	4.86415	4.8278	4.38045	5.41345	5.40829	3.7848	5.74155	5.93985	6.70429	4.17527	3.47364	6.59452	7.44517	6.18909
MAP7D2	7.30361	4.24315	3.86194	11.3408	10.2211	8.45782	7.06651	10.6425	9.12648	4.1332	4.09869	4.95466	3.82479	9.87327	3.772	8.79708	4.31311	9.5614	7.50195	8.0307	10.3158	8.97943	8.19005	8.62419	5.40024	9.33619	5.52177	7.67365	6.88457	5.05116	8.14984	5.27975	12.1621	6.28677	7.22044	5.06386	7.16944	4.24112	9.29175	8.91399	10.5082	4.13236	6.34026	8.67679	3.92421	7.72036	5.37042	7.07997	6.56244
LINC01279	4.2597	9.62879	8.42067	5.91152	4.54865	7.92543	6.77269	9.14163	5.81975	4.57614	5.15541	6.43761	5.62588	4.30814	4.07605	4.56134	9.02528	4.71627	6.64017	8.26197	5.75903	3.92272	5.52269	5.38835	8.01335	7.10814	4.15083	6.64158	8.29873	3.56967	5.68378	6.7663	4.21417	6.8772	7.51646	6.24903	8.59561	5.02082	7.9034	5.59585	10.5631	8.0467	3.76242	5.45242	6.36188	6.07205	4.90102	3.61564	4.20668
HS3ST3A1	4.012	8.3729	4.83072	3.92126	4.27171	3.94282	3.61665	7.41776	3.8964	3.52554	3.59295	3.86438	3.25313	4.19992	3.75522	3.53912	9.35724	3.79861	4.60421	3.77109	3.56487	3.57703	3.38907	3.18617	4.11671	3.71077	3.61835	4.05386	8.34431	3.73845	3.69867	3.30113	3.43197	3.78792	3.5072	4.26929	4.08588	3.45634	4.67541	3.553	3.81116	9.71274	3.43169	4.85291	8.10782	4.99395	3.46631	3.57138	3.92638
LOC100505985	4.01115	3.75119	3.61542	3.44415	3.86869	3.78258	3.61953	3.72559	4.01367	7.55889	3.70897	6.6622	3.60232	3.46849	4.6034	5.76923	3.72007	4.16325	3.66841	3.46603	3.75815	3.45248	3.57754	3.5811	3.47526	6.04734	3.51114	4.61994	3.59243	3.66347	5.88174	3.65665	4.15183	6.06324	5.14482	4.52438	3.75436	6.98065	3.81841	4.41173	3.54595	3.79419	6.68743	3.96741	3.67518	3.51788	3.5606	3.63552	6.90951
NPTX2	8.48221	7.59395	8.79552	11.2823	11.752	9.74077	8.51622	11.5634	12.6966	7.68793	6.75503	8.31371	4.46223	3.77265	6.62984	8.10349	7.15431	11.5546	11.8103	9.57867	12.5082	7.84984	11.752	3.62146	9.8532	11.998	9.08258	10.2582	6.28626	3.98013	11.9388	9.08685	6.18189	5.56374	5.08516	4.4455	11.4721	6.59687	10.9855	9.95625	11.3345	4.92879	6.62556	7.19143	5.37133	11.0771	3.7622	4.65029	9.02123
LOC100132735	4.03228	4.46909	3.82739	3.95341	8.02858	8.62943	7.06586	3.51404	3.51869	3.60527	3.84091	3.31272	3.49195	4.05606	3.23142	7.45191	7.17428	6.1066	3.44751	5.69517	4.59869	4.76105	3.32615	3.4361	3.48027	3.60009	4.93756	3.41669	3.60208	4.21683	3.72215	3.521	3.67375	3.77018	4.0402	3.61258	3.56691	3.41752	3.54778	3.4856	3.3069	3.29822	3.60966	3.38148	3.60283	6.03228	5.58762	3.49409	3.63867
LHX8	3.00248	2.94715	3.27238	2.82776	3.05303	2.87361	2.88023	2.94715	3.1682	3.24022	2.98975	3.21742	2.84979	3.02655	2.94435	3.59677	2.96266	2.99205	3.03291	2.98525	2.98975	2.97754	4.51531	2.95081	3.37908	4.05166	2.80928	2.96692	2.99879	3.01453	3.55199	2.94349	2.95847	2.99951	3.17306	3.01929	3.44636	3.00754	3.06449	3.03102	3.17544	3.00683	3.22212	2.98681	5.1517	2.87361	2.86867	3.0083	2.85197
TMEM27	9.48495	3.68271	4.92198	6.64647	9.3534	9.53499	7.8932	3.40825	7.58917	10.1882	6.01361	10.7133	3.58857	7.03552	10.6821	9.94621	3.30749	10.7353	3.89767	8.00362	4.49452	9.13753	8.30366	8.66433	8.11956	10.6642	6.36133	9.76589	8.71901	11.1042	9.60904	9.84929	9.79147	11.1695	8.63617	9.4212	9.07822	11.0501	7.42393	9.8376	6.08071	3.31335	11.0501	5.50403	3.10427	7.00473	10.2138	11.2295	10.796
MGAM	9.04592	3.95095	3.76357	3.99514	4.99892	5.68284	5.75281	3.95845	5.73918	9.33994	4.47792	8.45163	6.00552	9.33619	9.93577	6.21389	4.28634	7.77885	4.15102	6.07354	4.27824	6.61808	8.27101	8.70708	6.46281	8.08241	4.57221	8.11956	5.67687	7.83814	7.61698	8.71264	8.80573	9.6258	6.69156	8.18186	7.61357	8.93835	4.10701	9.08581	4.03634	5.39839	9.30003	5.36774	3.69176	4.92221	8.42328	3.97543	8.7871
LINC00844	4.01756	3.32123	3.16173	5.36912	6.58537	3.22581	3.22179	3.44499	5.52361	3.28389	3.16413	3.41089	3.29762	6.17832	3.30309	4.96135	3.22796	4.75173	3.35525	4.00995	5.1579	4.00782	5.42603	6.55838	4.80427	4.97715	3.825	5.04818	3.17265	5.06495	4.57552	3.3256	3.26872	4.17467	3.31458	6.93257	5.34475	3.4602	3.42967	5.26976	3.9782	3.16453	5.79872	3.45884	3.31027	4.48073	7.40722	3.55901	4.03228
TMED6	4.39634	4.10701	3.83705	3.78166	5.30783	7.22044	5.83616	3.7535	4.02622	8.10121	3.83876	5.37761	3.99077	3.61451	5.1201	5.11855	3.54726	3.78926	3.8852	6.37185	4.03592	5.71048	6.75629	9.87103	4.07664	5.44269	5.5183	6.61285	7.06048	4.68274	4.38065	6.87468	5.05642	7.20771	4.72898	6.34645	4.84974	7.74572	5.50922	5.79396	4.02305	3.41176	7.15639	4.54801	3.96142	4.46185	10.8594	9.02221	6.68539
IGFBP1	3.47364	4.76568	6.54902	7.45191	6.08965	3.51946	3.50695	6.61257	3.74396	3.48823	8.06268	3.57065	3.43083	3.42605	3.45109	4.23079	3.63211	5.89137	7.32945	3.81356	7.55716	3.43249	3.38235	3.6055	4.02836	5.13031	4.58866	4.57614	7.15745	3.27205	6.02517	4.87127	6.45874	3.54703	3.4361	3.58978	5.85247	3.77062	6.40297	4.71169	3.62599	6.2881	3.60671	6.44054	3.6841	7.38491	3.69197	3.50176	3.85731
SULT1C4	8.35118	3.8061	4.34668	6.53712	5.28134	5.3454	4.47443	3.57261	7.84652	4.71522	3.81136	7.06821	3.5127	3.50203	5.98832	4.30292	3.553	7.18959	3.59513	3.5101	4.97586	5.43013	4.31873	8.451	6.52194	6.97968	4.71331	7.29569	3.97991	9.3079	8.04462	7.20138	7.09394	7.90889	6.96222	6.29184	6.81822	8.55537	3.99854	6.57693	4.952	3.43781	8.1947	4.1983	3.7611	4.16523	9.03628	3.6399	8.12242
GBA3	7.51968	3.92379	3.91224	5.88199	7.6585	9.04404	7.75305	3.6399	7.18073	10.5534	4.04081	9.50311	3.6593	3.87275	8.97658	7.934	3.80199	9.66581	3.53119	7.47191	5.97995	7.08365	7.9446	7.77184	6.9438	8.07359	7.10749	9.29651	9.02324	10.2453	8.68219	8.04037	8.30423	9.71627	7.98358	8.3704	7.62929	9.85529	6.60916	8.07576	5.19752	6.02194	10.2852	5.06075	3.91034	4.96135	7.76236	10.7796	9.66909
DIO1	3.58734	3.43725	3.48953	3.43249	3.8162	7.39799	5.78431	3.65808	4.21233	3.29154	5.41618	3.30373	3.43197	3.56718	3.63307	3.41376	3.55984	3.70388	3.46359	6.11985	6.1809	3.64442	4.85616	8.20234	3.51165	3.3182	3.8407	4.43516	4.52784	5.70352	3.46659	3.6338	6.94009	8.51487	3.48982	6.62382	3.42304	3.37967	5.33814	3.55655	3.38469	3.32675	3.48027	3.41233	3.41811	6.22134	3.6094	5.74756	3.77962
ALDH8A1	9.84558	5.26586	5.09775	4.05525	9.75324	10.3185	8.63239	5.74467	5.41596	8.25702	7.51929	9.04101	3.57357	9.38586	10.2086	10.5174	3.61376	10.1295	4.61318	9.96902	7.05514	9.46345	5.32417	10.9804	4.55155	4.62566	6.87749	8.13246	10.4558	10.7715	8.69917	6.35949	9.61073	10.8249	5.95628	8.87969	6.62409	8.89435	8.57792	6.64104	4.90226	3.82479	8.05799	5.8849	6.05901	8.00003	10.0611	8.90236	4.6694
SLC34A2	4.28387	5.84825	5.07616	4.17645	7.48471	3.7697	3.5563	5.01993	7.17638	4.63875	3.60769	3.85282	3.4258	6.15053	4.28993	7.39567	3.58216	4.9231	3.80107	4.02795	6.85405	3.77493	4.0333	3.68058	4.32958	5.23277	5.56	4.65452	7.24698	8.54167	3.54678	3.89516	7.43288	3.96058	3.58632	4.56994	5.82895	3.5824	8.87882	3.81094	4.35831	3.36978	4.70548	3.64873	3.5963	6.4243	3.73063	7.59986	3.53939
NDNF	4.84251	7.58669	5.99333	10.9112	5.2883	4.84446	4.7509	4.24554	4.54456	4.94246	4.54192	7.10142	4.53242	4.21622	4.66169	5.51434	4.97437	6.21464	4.81822	4.44757	10.6752	4.67844	5.00571	4.31652	4.36634	4.6727	4.5085	7.78834	4.93074	4.49004	4.29505	4.62014	7.05205	6.23346	4.98421	7.28739	4.61866	4.53759	4.8901	4.33488	6.4609	4.45294	4.47606	4.23508	4.9903	6.81822	4.29212	4.32997	4.41865
GREM1	3.55076	5.22147	4.03613	3.95137	3.46163	4.37521	3.61304	3.90171	3.64563	3.23949	4.20031	4.91882	3.44402	3.31117	3.4077	3.59024	4.47542	4.1068	6.0827	5.19903	5.10174	3.40483	3.80853	5.26432	4.11749	4.07113	3.94139	5.3253	7.71716	3.27337	3.47442	3.77627	4.23407	5.37715	3.85429	7.2647	5.71267	3.32499	6.92058	3.60402	7.15263	6.21155	3.37354	8.50931	3.53912	4.47074	5.24323	4.62797	3.34091
BBOX1	7.77694	5.87205	5.65249	8.62649	10.1586	11.9673	10.5566	3.71146	8.69209	12.0932	5.08363	10.7475	4.59463	5.94595	10.7133	9.33201	7.20701	11.1871	4.00392	11.3754	8.85143	8.95344	11.2107	8.28062	8.6906	9.50937	8.59561	10.3212	11.4037	10.7515	10.0535	10.4224	10.0046	11.6457	9.77139	9.01535	9.91231	10.6752	7.43924	9.68269	4.26501	3.80376	11.2623	6.25194	4.08726	8.91115	3.98277	11.6757	11.301
CLDN8	3.8355	4.11239	3.8059	3.64563	3.50801	3.94405	9.89168	3.35338	3.61978	3.58033	3.54493	3.47999	10.3726	3.35401	3.27859	3.44609	3.70103	3.67472	3.58658	3.43697	3.55655	3.60402	3.66045	3.70639	3.26112	3.57581	3.36628	6.93058	4.01093	3.40201	3.35707	3.67213	3.44751	6.89202	3.24569	10.1512	3.39282	3.62342	3.49622	3.53939	3.91998	3.62927	3.50695	3.78258	3.59846	3.56256	3.2651	3.4726	3.30812
OGN	3.32436	3.17026	3.80546	3.65808	3.19198	4.88691	3.77219	3.37446	3.19011	3.82282	3.33877	5.49569	3.5083	3.36749	3.16453	3.08565	3.14388	3.39082	3.54623	4.25498	3.25706	3.18214	3.43697	5.91494	3.7041	3.86615	3.27827	6.02292	5.05071	3.38907	5.45039	3.65543	3.13348	5.62517	5.27997	5.70657	5.5424	4.20769	4.24135	3.65376	8.71497	3.70009	3.45608	4.59889	5.30694	4.60273	3.79745	3.24022	3.44111
PCP4	4.27409	4.34174	4.7423	5.13226	4.77855	4.57472	9.64066	3.97567	4.34299	4.22474	4.14959	4.22953	10.9024	10.8207	3.97904	4.09482	4.23628	4.83028	4.45294	4.38203	8.88929	3.96058	5.09396	7.74888	4.11116	4.17159	4.53242	6.15053	5.22637	5.75169	4.2734	3.83151	8.16929	5.71241	3.79976	7.77555	4.55454	4.00805	4.39815	4.1498	8.59773	4.19973	4.21642	3.83241	3.81136	4.94204	8.23485	4.85336	3.90592
TMEM213	3.68823	4.13638	4.09502	3.64301	3.65783	4.14797	10.4375	3.66206	3.89789	3.73176	3.92704	3.64516	11.3964	4.88751	3.68551	3.76994	3.76719	3.84382	3.85795	3.677	3.66887	3.82523	3.87422	3.85583	3.76651	3.7078	3.75656	7.11232	4.38025	5.36616	3.77916	3.91034	3.85902	6.869	3.74829	8.73658	3.85626	3.62172	3.80335	3.7136	5.85668	3.7354	3.81226	3.90065	3.76174	3.60283	3.64326	3.96209	3.94342
NEFL	4.78814	3.98633	8.21994	7.87376	9.95877	7.83656	6.50841	7.31319	6.01566	3.91891	4.41904	5.01483	3.6719	8.97084	5.15656	6.87749	5.53821	6.7313	7.56533	8.76892	7.12023	6.21079	4.37217	3.61905	5.63312	3.5525	6.4313	8.74862	7.94353	8.58745	5.92405	4.85549	3.83594	6.3208	4.01055	6.04485	8.572	4.78234	7.27416	7.89123	3.78525	4.83958	6.40729	8.44958	4.09052	8.87419	5.81388	9.24609	4.73004
ADAMDEC1	5.05054	8.59191	5.9811	6.9955	4.05487	7.38002	6.98065	9.67596	6.24059	5.23478	5.35538	5.47164	5.19857	5.157	4.25443	7.85713	6.62957	5.4929	5.32866	7.98199	6.00036	4.67618	4.3137	4.05113	7.63225	5.93227	7.83078	5.0632	4.27571	6.44082	4.31572	5.23345	5.50156	3.63284	7.4278	3.75008	7.98054	3.67071	4.97152	6.7102	4.14202	6.23188	5.08516	9.98226	6.04462	5.32933	3.45025	6.09527	6.01996
MT1M	4.45731	7.49165	6.06629	5.08406	9.07191	5.29346	4.6375	4.51976	5.70066	4.44757	5.65105	4.66007	3.65327	5.1873	4.10841	5.51084	4.11116	8.37809	4.72601	7.13553	5.10462	4.55137	4.50046	3.76382	7.47911	6.82597	5.65201	7.7874	6.22651	4.09684	5.59186	8.99494	4.02534	6.28473	4.57428	9.18309	6.32979	4.79083	7.52469	6.71421	5.71458	5.14683	4.6854	4.16562	7.15369	9.50153	4.79145	3.88889	4.1398
FDCSP	3.42304	3.32643	5.53654	3.34152	3.27602	3.27729	3.40912	4.96865	3.35307	3.33247	3.44221	4.02329	3.42967	3.43556	3.56334	3.29478	3.33548	3.26005	3.37616	5.78478	4.42696	3.57357	3.32183	3.51088	3.24845	4.95074	4.87717	3.36865	3.13496	3.39681	3.33877	3.50072	3.39834	3.3607	3.097	3.39681	3.45053	3.48267	3.25842	3.31428	3.45109	3.64112	3.19198	3.35014	4.15002	3.96782	3.34624	4.03613	3.28154
MUM1L1	3.68082	3.4917	3.53272	4.50992	5.70066	3.58059	3.38935	3.62738	4.19932	3.91418	3.51323	3.45081	3.77154	3.66863	7.15263	4.54562	3.45715	4.14797	3.5585	3.67094	6.60721	5.38992	6.09194	8.98705	8.68992	4.86115	4.21964	6.57664	3.48212	5.78605	7.46908	3.48212	4.28329	4.65303	3.62576	3.81226	4.30915	3.83441	3.62859	6.49208	4.21071	3.47206	4.17686	3.41985	3.57481	3.51246	8.15438	3.31057	6.17393
SPINK1	3.97946	5.92744	6.1043	8.06978	6.0847	4.17548	8.05091	5.0182	5.14834	3.69129	7.4011	4.30795	8.25827	3.90757	5.25319	8.59485	8.46905	4.44591	9.2318	4.81005	8.56776	4.27351	7.08365	3.96471	6.92704	9.94828	4.37217	7.6977	6.93385	4.1662	4.19263	4.04708	8.53159	5.63312	7.66577	4.99694	5.75616	4.45552	6.93023	7.4571	12.2315	5.25452	4.43496	6.28838	6.01239	5.61265	5.14683	3.90822	4.93205
ATP6V0A4	3.68639	4.58456	4.35311	3.8149	3.88397	3.85303	11.1585	3.77694	3.6761	3.72194	3.91463	3.81642	11.0771	7.58627	3.846	3.8173	3.70293	4.39017	3.56514	3.48717	3.62975	3.92126	3.99535	3.79397	3.67679	3.711	5.02691	7.17116	4.22661	6.53242	3.91829	3.87167	3.36807	6.64964	4.26261	8.47186	3.79191	3.75566	3.68128	3.68503	5.02127	4.10897	3.6956	3.49622	3.82936	3.62642	3.9645	3.82872	3.61353
SLC17A3	7.41357	4.37521	5.31845	3.97652	6.36818	11.6555	10.4494	6.11231	9.14057	12.0291	6.63991	12.5629	4.25518	7.35825	12.195	11.1815	8.27826	10.8889	5.57943	10.7245	4.85034	10.3983	10.7281	5.19376	8.25094	10.6786	8.35241	11.1815	11.5805	8.78965	9.20233	11.426	11.9829	10.8455	11.1479	6.44157	9.54431	12.6966	9.37495	11.1204	3.88103	8.19352	12.0932	8.11328	4.15386	8.67757	6.66593	11.9535	10.6175
KLB	3.43197	3.55349	4.52784	4.48134	3.8891	3.74463	3.45467	3.64538	3.37174	3.3753	3.4602	3.35276	5.44174	3.28776	4.83851	3.35525	3.27404	3.37792	3.60625	3.55607	3.74962	3.66795	3.29478	5.13181	3.46849	4.52173	3.4877	3.45769	3.54703	4.03228	3.43303	3.37644	7.5758	3.62412	3.35014	3.8105	3.4152	3.68847	3.55607	3.43895	3.41955	4.33425	3.68435	3.24371	3.35909	6.08446	6.45874	4.102	3.57658
FREM2	6.05056	3.47657	4.10035	3.85089	6.29441	7.34012	5.03162	3.04688	4.71086	7.58833	3.5192	6.12192	4.03349	5.13625	6.55838	4.50343	3.1354	6.05951	3.11055	4.50565	3.08977	5.01056	3.72767	7.57962	5.39658	6.31735	4.17928	6.09653	7.42855	7.24189	5.08776	5.37595	6.06029	7.4049	3.63867	7.71669	3.86783	7.14615	3.61905	5.16974	6.17885	3.68595	7.45399	3.39252	2.99726	3.66092	5.88875	7.15133	6.86402
TMEM52B	3.49409	4.65132	3.77109	3.56086	3.72052	4.37444	7.94971	4.25323	3.86262	3.83	3.63355	3.7767	4.3147	11.2496	3.78437	3.51998	3.76066	3.364	3.74257	5.01184	3.27506	3.45826	3.49009	3.71776	3.98118	4.19141	4.2286	7.59686	3.77018	3.55531	3.13676	3.12289	3.56867	7.09358	3.32801	6.52855	4.01834	3.127	3.711	3.78677	3.79507	3.32829	3.21114	4.16442	3.63428	3.83726	3.52023	4.62861	3.78677
C2CD4A	3.88251	5.50615	4.07378	4.14554	3.39393	3.58507	3.70293	3.4625	3.71169	3.43839	3.28282	3.58411	4.02058	4.50262	3.58783	3.61182	3.56256	3.70502	3.52381	3.57957	5.90582	3.33939	7.34697	7.59514	3.9322	5.6464	4.60085	4.3545	3.77805	4.11423	3.66466	3.98697	7.27305	3.92208	3.1866	4.2314	3.61059	3.54778	4.25887	3.70033	3.52652	3.34686	3.83485	3.47499	3.55223	3.31057	3.48051	4.04629	3.66887
ZNF385B	4.50425	3.89193	3.80875	3.55506	3.67841	3.79082	6.08638	4.63772	5.38646	4.21582	3.73655	4.71563	6.76012	7.02674	6.98743	4.67903	3.62859	7.58753	3.65592	3.6473	3.73475	5.42093	4.77541	9.55377	4.04688	3.93802	4.66877	6.24487	4.23814	8.31925	7.25963	4.04688	3.96741	7.60199	4.29042	7.3219	3.76563	4.66396	4.10158	6.53213	4.62279	3.70897	4.14758	3.8848	6.31411	3.59677	9.8774	8.5693	3.82087
SH3GL2	3.56409	3.91914	3.61427	3.40912	3.58783	4.67395	7.29497	3.56409	3.58708	3.64971	3.41924	3.51035	6.78411	7.84502	3.7428	3.83311	3.49409	3.68968	3.40425	4.47728	3.35766	3.50413	3.45608	6.70249	3.54082	3.42718	3.57212	4.68972	5.97117	6.30936	3.44891	3.52309	3.46516	5.90854	3.61764	6.15972	3.43952	3.41089	3.65736	3.3753	4.25343	3.47234	3.46546	3.42334	3.51351	4.31133	5.94695	6.35687	3.4077
SCG5	6.83924	8.23788	6.83092	4.72519	5.66809	4.75744	4.10538	6.46941	7.34084	3.75305	4.28071	4.37362	3.93565	7.97724	3.97714	7.45745	8.81506	4.93164	5.35977	5.47233	5.98686	6.37238	7.15431	5.9787	5.86325	5.16847	8.10568	4.56974	4.63833	5.11831	4.95772	4.21477	6.82825	5.52088	4.85616	4.55639	5.26477	3.81116	7.96575	3.95716	8.13837	7.04211	3.66092	7.48963	9.64066	6.42087	9.16174	3.78973	3.98612
CALB1	3.37446	3.48398	3.74962	3.25942	3.27506	4.52315	3.5912	3.31701	3.85089	3.3397	3.36749	3.27729	3.45551	3.28649	3.42664	3.34745	3.54976	3.387	3.38321	3.37201	3.38557	3.46489	3.32436	3.3838	3.27076	3.26776	3.27437	10.176	3.32467	3.47814	3.33427	3.31672	3.34268	8.11837	3.3406	5.5255	3.343	3.29346	3.20256	3.62859	3.19354	3.56817	3.41433	3.30176	3.72675	3.39681	3.35646	3.29855	3.32615
LOC100506498	4.13621	4.08628	3.79955	4.14919	8.69847	10.1368	8.52938	8.07907	6.25089	10.3098	7.69942	7.49337	3.32528	4.36413	8.24026	9.28932	6.56937	8.35875	10.0199	6.11476	5.37528	9.52005	6.57022	3.30719	7.18925	8.97852	6.50983	7.50038	6.65048	4.38045	5.61959	6.54456	8.72605	5.59137	6.09219	5.6273	7.69232	7.45275	7.14022	9.2581	6.03228	3.28088	8.35241	6.81187	3.16293	8.66135	3.30079	4.1177	7.59727
CLMP	3.80418	7.68005	7.72626	4.03003	3.74761	3.60208	3.86262	8.39417	4.33342	3.55824	7.97784	3.92292	3.54235	4.03089	3.4954	4.40321	3.83217	3.83746	5.3334	3.87189	3.83964	3.63773	3.67141	5.90631	4.00288	5.72786	3.88822	3.96251	4.64144	3.81531	3.74168	3.44891	7.64859	4.46039	4.30211	6.76126	4.29662	3.74145	4.71374	3.89913	5.82338	7.31507	3.68317	6.21155	8.23231	5.69875	6.27225	3.74123	3.63098
MFAP5	3.59168	8.70241	4.02665	3.98365	3.34268	3.72559	3.57112	5.96795	3.57357	3.51404	3.75978	5.68493	3.49566	3.52505	3.54209	3.43669	3.74603	3.90887	3.82436	5.01653	4.31593	3.56616	3.35219	3.34653	4.77671	3.44973	3.46546	4.31016	7.31997	3.38148	3.54778	3.43249	3.72976	4.93527	5.1499	3.6866	5.67115	3.58954	4.21582	4.50184	7.91674	4.44635	3.54825	3.30749	8.00591	4.1169	3.63796	3.30705	3.44636
IL6	5.22699	8.56278	5.37827	10.537	4.84465	5.23817	5.07031	9.9338	8.02153	4.6654	6.42033	5.43583	5.05012	7.4432	4.67618	6.64564	10.9247	5.16691	8.72849	5.58196	10.7435	5.19046	4.73549	4.60461	6.10502	10.8717	6.54929	5.58907	8.28062	4.57888	7.15567	5.79299	5.87514	4.62587	4.85424	7.09704	7.08569	5.01946	6.26163	5.36974	6.22756	10.8076	5.02215	7.94922	5.48245	6.20813	4.85855	4.53636	4.69123
CP	8.21342	6.44752	4.06929	12.0291	10.8076	9.48775	7.93949	8.22994	10.1105	9.2069	10.3807	8.0307	3.80129	3.95179	7.486	12.1254	6.16129	9.9338	11.3408	9.55054	12.6581	9.50792	7.41312	3.72119	7.92193	10.5763	9.75324	7.56009	9.98018	4.01554	9.08144	8.25518	11.3476	4.92858	6.92958	6.22701	9.68448	6.35818	11.4878	8.8866	7.45112	7.12414	10.3752	9.28072	4.1116	11.3211	4.04234	8.97943	10.1295
C5orf46	4.96196	9.61073	6.92026	8.06695	8.69447	7.52633	6.25621	7.18818	8.10121	4.78499	4.99137	7.48429	5.17131	4.38102	7.87834	10.4435	6.11207	6.13938	5.56704	7.49796	8.27585	8.26668	6.55779	4.24094	9.24109	10.8758	5.14268	7.84557	5.8437	4.3147	5.41143	5.41618	5.12967	4.3539	9.60129	4.20849	7.97622	7.49413	8.43326	11.2689	9.639	4.99502	6.2897	10.6073	9.76589	6.73821	4.6052	6.07699	6.28651
TENM2	5.66264	9.6522	5.55602	5.75972	4.13659	4.05051	3.81531	8.83224	4.47484	4.07216	3.53094	3.91396	4.23794	3.60329	4.3877	3.65497	3.73268	3.75329	3.535	3.84316	6.40894	3.93351	3.88844	3.44665	3.69892	5.12619	9.38179	5.2006	7.99244	3.62859	3.95549	6.09219	3.8791	4.09482	3.77893	3.60695	4.04423	4.40762	9.14057	3.61474	7.62444	3.80418	3.96908	4.42471	5.59303	4.01494	3.5127	3.75414	3.59797
HP	5.57874	5.88635	5.1911	5.34363	12.9767	6.58677	6.05827	5.25319	7.41969	4.79103	11.6658	5.08736	5.1253	5.82287	4.86518	11.7629	5.56912	5.24062	6.94763	10.4403	13.3894	4.65473	5.06537	4.6864	5.62913	9.98226	6.31999	4.98575	7.53317	5.08819	6.27641	4.69081	11.7872	5.03835	6.04042	4.91968	5.3423	4.85833	11.1991	5.2259	5.22613	5.38811	5.13873	5.19421	6.36655	10.5763	5.00149	4.82576	5.07138
CXCL8	5.5271	7.56181	5.96224	6.12246	5.10861	5.20127	4.98104	7.29904	6.83271	5.47529	8.95344	5.60169	5.15124	4.96352	4.17078	7.94767	10.6316	5.46194	9.0675	5.46527	7.88131	5.15034	5.92476	4.20647	6.0572	12.1254	10.1105	5.27933	8.4537	5.3934	6.01051	4.66333	8.97755	4.9648	5.01526	7.65021	7.1064	4.66302	8.03989	4.62985	4.92903	7.92242	8.1636	5.93449	7.78405	5.54413	5.23639	3.85324	5.73026
SLC10A2	4.14163	3.76675	3.88293	3.68128	4.40989	7.42313	6.10154	3.85303	4.78083	7.43169	4.03003	7.34812	3.96887	4.01676	6.73245	5.68444	4.08386	7.56618	3.76242	4.51836	3.84838	5.13603	6.01261	5.50246	7.30693	5.36751	5.2404	6.86553	4.03775	4.08588	7.03318	4.66684	7.45353	7.61445	5.07117	3.96599	6.19799	7.7765	3.65713	6.63065	4.70741	3.61542	8.61892	4.50184	3.74807	4.22935	4.70465	4.44841	7.53242
IGJ	4.92437	8.82764	8.20755	9.33994	4.102	9.74251	8.36199	12.5828	7.01917	5.41842	10.068	7.9446	4.1924	9.46208	4.28135	12.1621	5.10108	7.47309	9.13952	10.299	4.8957	10.6142	4.7959	5.11193	6.37562	4.69898	11.1934	8.74695	9.96902	8.01994	7.43402	8.08353	7.86641	7.57245	8.23485	7.62616	9.07191	5.91695	10.1488	8.63471	10.6142	10.2138	7.31399	11.5546	5.21284	5.81293	8.30182	8.75518	7.77283
CCL20	7.39915	5.78528	5.11545	11.5805	5.15925	7.55419	6.07622	5.08343	7.66577	9.24358	5.73389	7.94253	4.3067	4.29402	6.49736	9.97558	9.20351	9.48203	9.46486	5.95137	11.4878	8.35748	7.1946	4.22661	6.6907	11.8103	6.83583	7.6007	8.06014	4.28934	10.8803	10.0864	7.97672	5.21686	9.14495	5.31235	6.43345	7.75261	11.2233	7.30135	5.04518	12.0932	10.4743	7.52919	9.54276	10.3442	4.31652	5.84146	7.0548
SOSTDC1	3.51351	3.86593	5.04392	3.56991	3.75143	4.21355	3.72304	4.70046	3.85006	4.1066	3.56384	3.59868	3.69583	3.63098	3.83129	3.71683	3.71826	3.81094	3.81403	3.72444	3.70851	3.65592	3.97415	3.64824	3.76382	3.45328	3.25042	6.03107	3.63751	6.70249	3.70456	4.09603	3.81403	5.9971	3.37201	8.19113	3.92167	4.11972	3.77109	3.38729	4.15346	3.66021	4.32256	3.78834	3.68386	3.84111	3.93016	3.53653	3.60707
SLC27A2	8.00955	5.26954	4.33055	4.04274	6.33142	9.37629	7.90982	3.98365	4.51575	9.22482	4.68908	8.40576	7.3291	5.65016	9.04101	4.72497	3.80875	9.26582	4.08748	7.42855	5.89426	6.24439	8.22401	3.772	5.78215	6.11578	4.56974	8.38833	7.96417	8.01886	7.93654	7.96899	6.37531	9.6173	6.70959	7.30394	6.7572	8.76416	5.18797	7.88776	4.7526	4.95859	8.89527	5.7217	3.87254	6.22212	5.92309	7.65933	7.66488
LOC101927734	4.93119	3.32895	3.47071	3.70196	3.72997	4.78584	3.46958	3.11254	5.67995	3.60817	3.70223	3.82914	3.08565	5.17822	7.01917	3.87464	4.08929	6.3509	3.03849	4.03469	6.75659	3.74714	4.10035	5.27279	3.70055	7.78639	4.89032	3.51683	5.73722	3.82065	7.21281	4.23876	6.34645	4.53265	4.00782	5.65597	3.85429	4.31753	3.77805	6.5747	6.88078	3.35132	4.72165	3.60695	3.14596	3.24636	4.02752	3.74145	3.81754
FMO3	3.64348	3.86111	7.93949	7.04178	5.82457	8.72362	7.51892	6.7866	7.95956	5.35538	5.44883	6.38483	4.18311	4.14243	4.04149	4.48155	5.94895	7.0595	6.29627	7.77184	7.30172	6.42616	4.84083	5.22989	7.83561	7.94868	5.32933	7.77555	3.86091	4.22474	7.35298	8.06642	3.87211	6.01617	5.80211	5.54776	8.46773	5.30848	6.53627	4.39914	6.50215	4.47728	4.15423	4.94497	3.88378	6.74756	3.85963	3.8029	3.80679
SLC16A9	8.07576	4.86518	5.48685	4.45491	7.16168	8.41944	6.96192	4.12397	5.41958	10.3894	5.63804	9.08038	4.11199	6.09502	10.8035	7.11407	4.65385	8.93653	5.30718	5.53919	5.18043	5.87979	7.59045	9.19308	6.48178	6.6631	6.70311	8.55176	6.25904	10.6938	8.2282	7.65593	8.38895	10.068	6.30012	7.17568	6.03551	9.13858	6.0842	7.83656	4.67923	5.36524	10.0378	4.22109	4.16678	7.29079	10.1736	8.74943	11.071
ACSM2B	7.93703	3.86071	3.74351	4.31674	8.27043	6.55106	5.03335	3.57658	4.94842	7.55547	6.20611	7.4076	3.79551	3.7521	7.05716	5.06623	3.76651	6.598	3.69468	7.23153	4.63772	5.18977	7.11606	8.86818	4.70632	7.12414	6.28112	6.28319	7.8013	8.01941	7.71901	6.00403	8.56505	8.95731	5.91695	4.92352	5.95377	6.869	4.44306	7.88727	6.20896	3.72789	8.10513	4.10139	3.58831	6.06856	6.39678	6.81391	7.90686
TFPI2	7.83316	10.068	6.66622	5.38121	8.86464	5.91102	6.3432	10.9433	8.19529	6.64331	10.031	6.01122	7.81639	5.3731	8.14984	11.0553	9.50468	7.62746	11.6555	5.50014	6.49258	6.71973	7.34279	7.57245	7.04438	8.59056	7.79123	6.43705	5.29369	8.38187	6.11629	6.8106	9.57378	6.03132	5.86923	7.72889	7.42541	5.7985	9.03036	7.56533	5.01672	11.8473	7.71809	9.60734	5.61523	10.5141	10.0657	5.52505	6.56102
VNN1	4.0124	5.45987	5.20468	10.7998	5.20488	6.32843	4.94077	6.23902	6.00205	4.63994	5.97117	5.06119	3.78994	4.22454	5.23301	9.46486	6.1809	5.21554	4.72039	7.89464	9.93577	5.53481	7.55337	4.40886	5.45339	7.07123	6.24417	6.38456	8.23668	8.07309	4.44613	5.15407	6.23162	6.07773	5.13603	4.79526	5.08374	6.24288	7.86641	4.47198	6.81945	6.72535	6.91896	5.3423	4.48678	6.21699	6.15535	7.50038	8.06373
GPR64	4.59957	4.16639	5.73823	7.78267	5.74131	4.76898	5.5496	7.18675	5.55744	4.68022	3.93825	5.977	3.91998	3.70897	3.90086	3.93713	6.96894	5.52915	6.22339	4.70402	7.05682	4.09828	9.34135	3.8913	5.54348	4.50748	4.5274	6.76072	5.72763	4.00267	7.09358	5.09375	6.21829	4.61932	4.19605	6.4051	5.28513	4.64059	5.37374	4.8063	4.34522	7.59308	4.26646	3.74486	5.84247	6.33944	3.82827	3.93157	3.84534
FAM150B	4.14695	4.29346	4.56134	3.60257	5.08561	6.73761	4.87911	4.43496	7.31093	7.04282	4.28634	7.7686	3.66182	3.91591	8.86991	9.29778	4.69601	9.86136	3.57783	6.93126	6.16329	8.42328	4.97627	3.24371	6.74424	6.92474	6.01215	8.43196	7.27927	4.92221	10.1488	8.10999	7.64476	5.74662	7.41141	6.25275	6.36218	7.99753	6.8619	9.26824	6.90438	3.50772	8.27466	4.59235	3.32183	5.40623	6.93543	6.09297	8.30981
KDM5D	4.2733	7.0922	8.15611	4.25246	6.79783	8.15438	8.13837	9.35065	8.29564	4.29346	4.24435	4.34565	5.64143	4.38552	7.53893	9.11116	7.97672	7.20631	8.13359	7.89512	7.827	8.94206	8.82179	4.38671	7.92496	4.37881	4.46767	7.97207	4.09398	4.56955	8.50519	4.46747	4.43679	4.40119	8.08679	4.40642	8.25581	4.21902	7.83863	9.13323	9.79541	3.83065	6.73157	4.36551	6.92124	6.45545	4.57909	8.58372	7.10177
HEPACAM2	3.17068	3.47762	3.23778	2.97349	3.15756	2.95331	10.6073	3.14862	3.05111	3.12602	3.13305	2.99357	11.015	3.05659	2.99357	2.84753	3.10005	3.06449	3.04941	3.37644	2.76706	3.16332	3.06794	2.96523	3.14515	2.95672	3.21338	5.24867	3.52859	3.21154	3.01787	3.19619	3.08977	4.42638	3.06681	6.38028	3.03228	3.21997	3.15372	3.14596	3.58291	3.22581	3.04624	3.0594	3.36544	3.13944	3.15208	3.23359	3.1192
UGT1A6	9.122	3.89789	4.58562	8.5713	8.31306	8.0617	6.69601	3.67961	5.01526	6.42219	4.35033	5.56068	3.76133	3.94365	5.05071	8.13953	6.40538	6.04239	5.97821	3.90235	5.83688	3.75723	10.1246	10.3927	4.42514	9.15044	7.6395	7.63501	6.61522	8.17298	9.16284	5.42627	8.93835	9.72648	4.72703	6.18039	5.6431	9.02623	5.86559	5.06386	5.65129	4.20094	7.10511	6.72238	3.65115	7.78589	8.65344	4.25909	7.0447
CXCL5	3.25974	3.8261	3.24402	6.09527	4.73986	3.28902	3.15544	3.29855	5.30627	3.49622	3.82021	3.21229	3.23006	3.28249	3.1845	4.32462	3.91182	4.46102	4.79282	3.23218	5.95478	3.57832	3.21338	3.17504	4.98336	6.07205	5.43583	3.65808	3.25842	3.24159	3.37174	3.58608	3.53963	3.1682	3.28316	3.28746	4.0033	3.15292	3.44835	3.23778	3.89979	5.76524	3.54469	5.13671	4.45046	4.68952	3.63701	3.0985	3.22761
CLGN	5.19667	7.00775	3.91504	7.27605	5.24017	3.20146	4.96031	3.5563	5.24641	3.09494	3.25075	3.55655	6.29575	3.85367	3.88293	5.64879	7.56827	5.56867	5.75327	3.66021	8.29259	3.14164	6.1043	8.24367	4.5603	4.86268	5.04624	3.50231	3.38992	5.52915	3.91463	3.33216	3.48797	3.19432	3.54544	3.42885	3.1086	5.13446	3.51735	5.00662	4.62716	3.4258	3.59024	5.41213	3.88123	3.95466	7.55043	3.15292	4.19564
TRHDE	6.77786	3.54036	3.61614	3.06508	3.46329	6.72119	5.20447	3.23741	6.23493	8.12066	3.75329	6.8204	6.37562	3.10716	6.59716	5.21686	3.74145	6.57664	3.09031	3.5846	5.27619	4.26685	5.10329	7.77555	5.69662	7.09119	3.39365	5.98159	3.70055	6.86061	6.08863	5.14905	7.27048	6.79024	4.30932	6.18442	6.48872	6.989	3.55555	6.38908	4.90556	3.19158	6.84084	3.67307	3.23006	3.39973	6.31305	3.43867	7.1216
PTGS2	3.88378	3.58632	4.93948	4.61256	3.89043	3.74873	4.18311	4.32583	6.74938	3.74807	5.7365	6.48791	3.91829	6.69431	3.53835	4.82239	5.49223	4.49331	9.21748	3.92061	8.18	4.0333	3.54752	3.40885	4.90797	8.22519	4.69537	5.21023	5.86183	3.25572	4.48803	5.2173	4.88794	4.10302	4.93205	6.16483	4.97975	4.09746	5.27232	3.94554	6.04015	7.84984	4.27886	5.17688	5.63242	5.35954	3.7611	3.3637	3.76472
LINC00645	3.13305	3.28057	3.13348	3.0985	3.05179	3.21261	3.13944	3.17659	3.3537	3.24704	3.17386	3.15591	9.04404	4.50565	3.17306	3.19619	3.34446	3.06848	3.17068	3.08356	3.14347	3.19046	4.89202	3.27986	3.02978	6.79535	4.42555	5.29007	3.11206	3.8083	3.08252	3.06214	2.93657	5.81787	3.06963	8.05421	3.18214	3.04941	3.10145	2.90019	3.15501	3.07019	3.19503	3.3173	3.19081	3.1159	3.20707	3.05659	3.51088
LTF	6.1078	11.1154	9.48775	10.3098	5.35933	6.25408	6.60057	5.38787	5.9492	4.97671	5.21132	5.18197	6.55296	7.62132	4.90102	4.91437	5.24825	9.32693	5.63151	6.84604	5.87062	11.9107	5.96148	4.9336	6.07897	5.35076	5.17261	9.04694	7.13044	5.3207	5.55855	5.68493	5.1849	6.90123	5.15925	7.72083	7.30945	4.92012	7.38078	5.14207	6.59937	4.58927	5.29052	4.66007	4.84505	7.18321	5.05271	13.4266	5.00571
PPBP	7.76906	4.6	5.07701	3.43083	3.91849	4.16064	3.81598	3.37325	3.71007	3.63236	6.68925	4.06042	3.48051	3.769	3.56817	3.57065	6.4456	3.83334	5.5546	4.47989	4.42555	4.20991	3.4877	3.49434	4.05176	7.67625	5.36707	4.51243	7.02444	3.43839	3.47657	4.51836	5.66787	5.09817	3.9937	3.63506	3.82087	6.7313	3.84514	3.57504	3.73384	5.65039	3.3643	4.10477	4.57677	6.16813	3.91998	3.50046	3.62951
NOG	5.78215	8.79795	3.385	3.48535	4.0064	5.3352	3.89767	3.61085	3.60817	5.01056	7.84891	4.02919	3.2591	3.37325	3.75978	3.28776	6.34132	5.5451	4.23182	3.27238	4.12923	3.70033	3.42498	3.42218	5.62145	6.19695	3.96866	3.93927	5.13273	3.45081	3.90259	3.28421	3.75076	3.44695	3.88866	3.08192	3.26342	3.69941	3.81427	3.50643	3.64348	3.958	3.89193	3.17386	4.16442	6.66071	3.43924	3.42218	3.37733
F3	4.31816	9.80085	6.6161	4.98126	4.8138	6.479	5.72123	8.90236	7.4912	5.00593	7.68747	5.69392	5.30647	4.50147	4.95378	5.08713	7.22545	5.76328	8.42926	6.77424	5.92114	5.07399	5.08692	7.54671	6.57359	6.74724	7.40912	6.96222	9.74621	4.74356	6.00477	5.5698	5.05557	6.24669	5.01483	6.95499	6.79055	5.14052	7.08065	5.22502	8.24969	6.51545	5.2355	10.0959	6.63961	7.38302	4.44286	5.2151	4.75828
UGT2A3	5.76715	3.37091	8.25518	9.23772	9.21038	8.20463	6.45075	3.00542	7.72036	8.46773	6.02315	8.13718	2.96438	2.99642	8.2	6.96509	3.80724	8.77205	6.59854	7.18533	6.13783	7.08169	7.13962	3.14077	7.19994	6.86776	5.57896	7.72132	7.83968	8.53805	7.67793	7.42044	6.89995	8.73737	4.45272	6.32555	7.05581	8.40707	7.75441	8.20056	4.4775	8.80231	8.43256	5.9359	3.03353	8.76892	3.32304	9.63227	8.68992
TNFRSF17	3.44581	6.26423	3.97693	4.01577	3.28282	5.01098	3.89087	10.0378	3.49434	3.45496	3.8405	4.2648	3.36458	4.07194	3.39538	8.81749	3.33103	3.54726	5.10153	6.16229	3.49827	4.86683	3.54185	3.68271	3.45967	3.29918	7.35148	3.82175	5.21023	3.77759	3.53575	3.78084	3.77399	3.69153	3.74033	3.5057	3.80065	3.52023	5.04329	3.98034	3.94513	5.56185	3.62642	6.63701	3.43924	3.69845	3.8477	4.50952	3.90652
LUM	3.90845	8.05421	8.63919	7.93996	6.11007	8.26137	7.01503	8.87703	5.41796	5.35844	5.35446	6.15972	5.88319	4.91158	3.61376	5.36912	5.98982	5.82921	7.42278	8.53942	7.03182	4.19625	6.78719	5.18197	7.81553	6.47248	4.3019	7.22545	8.03939	4.46849	6.45959	7.0068	5.33045	6.92767	7.14826	8.24847	8.24493	6.02416	8.94964	5.65809	9.10131	7.32681	4.76733	5.99585	8.18292	6.74236	4.18208	3.61858	4.50066
LOC102723493	7.48719	3.5937	3.85282	8.69607	9.59967	9.42856	8.10173	3.84469	4.75131	8.74862	5.44926	7.90933	3.70804	3.63236	8.95437	7.05446	4.32604	8.167	6.00353	8.84359	8.23668	7.5496	10.0133	5.78478	7.03655	9.64385	6.61551	8.05535	7.78639	4.9564	8.64132	6.62527	9.83973	8.91297	7.95801	4.61529	7.40985	8.22057	7.72132	8.12298	6.53602	3.81709	8.79227	5.11746	4.11563	6.88169	4.62469	6.17651	8.57069
HTR2B	3.5031	3.9559	7.03318	6.04734	4.1696	7.57413	6.04361	8.01994	3.85388	4.28091	6.49093	5.0314	3.97924	4.24814	3.2802	3.64947	3.48187	4.44061	6.05382	6.23721	4.83266	4.01756	5.10553	6.4051	7.08169	5.68514	4.01136	5.73558	3.60576	4.12201	5.44064	5.95606	3.41433	5.16629	5.69416	6.2385	7.54058	4.40642	6.96384	4.47929	5.53942	3.65302	3.53246	5.05205	6.10634	5.55624	6.45988	3.9832	4.0855
AGTR1	5.69274	4.08058	4.75216	6.05666	5.17416	5.48803	4.23267	3.65882	4.23855	7.03854	3.99307	6.48681	3.69447	3.8061	6.33351	4.35671	3.89452	6.06805	3.8985	4.05525	9.11669	4.67579	4.38552	4.73689	7.2994	5.61959	3.56843	6.55269	4.134	3.77154	6.1643	7.19214	3.88188	7.42821	5.37485	7.25149	5.86348	8.03989	3.87017	5.61096	4.63336	4.25827	6.64676	4.0337	5.73147	4.80962	3.67472	3.74463	5.08604
KCNJ1	3.90631	5.41005	4.91947	9.46486	3.70171	4.67885	4.24752	3.86194	4.02489	3.79657	4.04629	4.16325	4.34911	9.64235	3.77446	3.72858	4.13799	3.88782	4.06344	3.88437	8.92066	4.15702	5.57265	4.72452	3.87828	4.87438	3.94846	7.99342	3.77848	4.09418	4.11138	4.16286	6.5553	8.19708	4.06826	10.2688	4.57037	3.87038	3.80129	3.86783	3.88457	3.96493	3.93176	3.83377	3.846	3.94075	3.8182	3.96929	3.83876
CTB-167B5.2	3.62454	3.4269	3.78325	5.5792	4.07645	5.81998	3.94139	4.9607	6.12778	6.59543	5.82383	4.91968	3.13496	3.74056	3.72606	5.0469	4.87334	5.5703	3.44944	4.33608	6.66935	4.28673	3.31701	3.77493	7.36629	6.03797	3.51323	5.42374	4.82693	3.38645	5.48916	8.72362	3.68339	5.15407	3.64326	3.99514	6.07575	5.03185	3.94139	5.1401	4.23586	3.65092	4.41294	4.98017	4.11749	3.93396	3.28933	3.46303	4.29346
CCL19	4.72124	8.72452	5.60952	4.26911	4.27069	8.20345	7.16657	9.33994	4.74502	4.66619	4.28471	5.95701	5.14075	4.30574	4.06948	4.59235	4.98288	4.67478	4.88944	8.83581	4.50125	4.99204	5.31805	4.46398	7.58833	5.08406	5.19174	6.45075	5.47023	4.36252	5.64044	5.38717	4.71669	6.19523	6.05006	5.84492	7.85905	4.67782	7.52633	4.27409	8.06477	5.37508	4.4547	5.09665	3.98277	4.92375	4.85249	4.73256	6.11352
LPPR5	7.01858	3.50072	3.44636	3.41924	6.28838	3.63236	3.50878	7.44437	5.86875	6.55077	8.29684	5.36091	3.59556	4.03958	7.02808	3.53298	3.64705	5.93352	9.17608	3.55877	3.68942	3.4161	4.81546	6.43262	5.5935	5.01184	3.78213	3.71638	3.52453	5.99832	3.50958	5.6913	5.86656	6.28889	3.53424	3.32528	4.74584	7.09427	3.63576	5.15611	3.72789	3.48051	6.36438	3.489	3.59219	8.55243	3.39538	3.40028	4.68254
RGS7	3.38557	3.35613	3.46631	6.7724	3.23949	3.24402	4.05071	3.097	3.25505	3.48717	3.20109	4.07398	3.77581	3.17104	3.50467	3.66586	3.25505	3.25011	3.06681	3.06395	3.28316	3.31458	3.18932	3.22073	3.30209	4.58988	3.59534	4.0884	3.23429	3.29478	3.19789	3.277	3.27042	3.61905	3.48927	3.62531	3.12289	5.34183	3.16948	3.32467	3.16948	3.34714	3.30967	3.33366	3.34477	3.31239	3.40425	3.08412	3.85984
RARRES1	4.44529	10.537	7.02048	7.12555	7.30361	6.14117	5.84441	10.5666	5.7946	4.65007	4.61571	5.53363	7.73789	4.43578	4.20749	9.81223	9.52005	5.93542	7.46483	6.35498	6.97506	5.45107	5.22764	4.19203	7.71173	5.99809	6.9193	5.0538	7.30321	5.77562	5.30869	4.54436	8.37871	5.46596	4.29583	7.05918	7.88481	4.63562	9.67925	5.37804	7.69896	5.94502	5.98907	7.83606	5.68233	8.42862	4.32627	6.19117	6.37
PRIMA1	6.70076	5.1849	4.89287	11.1479	9.95038	5.42438	5.12391	5.79947	9.04694	5.0084	8.98515	5.3666	4.85249	4.82471	5.05832	5.76641	5.51596	11.3274	8.9225	9.37061	11.4957	10.1295	8.12978	5.09796	6.7572	11.0553	7.11504	8.83836	8.55314	4.81111	7.16906	4.62488	8.71981	6.84548	8.49259	5.8916	10.1151	4.70484	8.69135	10.0001	9.39305	5.84172	4.94842	8.967	5.47778	10.0221	6.29131	7.99904	8.6906
LINC00973	2.96347	7.70163	7.53441	3.04688	3.00175	2.84528	3.11105	3.73109	3.29092	2.9791	3.04883	3.07985	2.88777	3.16173	2.89602	3.16775	7.00044	2.89038	3.61665	3.00968	2.89325	3.09085	3.15544	3.09392	3.28649	2.89325	6.77058	3.0083	4.74148	2.998	3.01171	2.99287	3.03291	2.82199	3.25706	3.08977	3.07825	3.10098	3.37268	2.88023	3.20893	5.7198	2.98825	5.74711	3.25379	3.14388	3.09801	3.02185	2.90665
FLRT3	7.7406	6.06475	6.0572	5.02388	8.32363	7.90836	6.60861	3.94617	5.04581	8.61387	4.34341	8.24552	6.21674	9.41134	9.08779	7.67112	4.0855	8.01222	3.90489	4.8605	4.67395	8.42258	6.17651	4.0337	5.65105	6.77873	4.39196	8.29564	6.94138	10.3616	4.84083	5.72002	5.80736	7.92902	4.09564	9.0067	5.83256	8.11109	5.4251	6.94885	8.39921	4.2347	8.41436	5.57406	4.65968	8.18643	6.69399	4.82448	8.31561
CYP24A1	3.36573	5.83184	4.78895	3.32924	4.94497	3.55429	3.64563	5.40138	3.41176	3.70363	3.46489	4.05966	3.47388	3.66818	3.67633	7.03047	3.5937	3.44918	3.35047	4.21169	3.54703	3.31368	3.56159	6.5047	4.26076	5.70906	5.66502	3.57504	3.94513	3.29186	4.36654	3.42304	7.30549	4.30915	3.50748	4.47645	4.96031	3.45496	5.76401	3.43924	4.71584	3.25741	4.29984	3.26481	3.38729	6.05666	4.15882	3.34624	3.92569
CKMT2	4.48338	4.68867	4.4175	4.28532	5.73963	4.55924	8.26252	4.28735	5.20488	4.36929	4.40624	4.39756	9.02734	4.42449	4.25602	4.64081	4.31712	5.53267	4.21861	4.20973	7.42008	4.77876	7.71989	6.43815	5.61587	5.04136	5.86678	5.4148	6.16968	4.92076	4.50827	4.35911	4.0754	5.1913	4.52398	6.35687	6.61892	4.36352	4.53734	4.12457	5.29767	3.94993	4.09379	4.3786	4.03634	4.49227	9.01535	4.39435	8.39094
PCDHB16	4.38184	4.50707	6.7028	4.76105	6.74	6.16329	4.23939	6.47163	4.94119	5.40442	5.61887	5.80236	3.44402	8.85758	6.88764	7.38528	6.80999	5.77279	3.67284	4.29231	8.75019	6.55048	6.23397	5.24106	5.56469	5.77685	6.6613	6.24622	6.91323	8.75849	5.23478	4.53141	3.95032	5.06252	5.91746	4.29465	6.81945	5.25093	5.07762	4.90862	6.30489	6.59043	4.08788	5.03641	5.94719	6.02466	4.36313	8.62419	4.18429
C2orf40	6.33915	5.00882	5.82074	4.16442	4.78645	8.28003	7.33896	4.46323	5.19948	5.50454	4.87568	5.85098	4.59132	5.60531	4.9659	4.00106	4.29843	6.75174	4.80278	7.03418	4.72474	4.75475	5.55252	5.56842	6.36109	6.16711	4.20447	9.0077	4.01872	4.19523	6.02908	7.53734	4.31674	9.15946	6.13006	8.51957	8.71027	6.29846	6.41513	5.23055	8.52575	4.94497	5.57146	4.13919	3.86783	5.59114	5.23684	4.3375	5.19578
TMEM100	3.96951	3.99704	6.1214	4.69081	6.6161	5.50014	4.12823	5.46501	5.28226	4.62259	8.13359	4.8946	3.53575	3.68058	4.38203	7.20771	3.49434	5.50639	5.10928	4.68149	5.31167	3.94576	3.69751	7.91571	6.843	5.23123	3.89809	6.55353	4.64821	3.56539	5.94796	5.8739	8.57352	5.29392	3.66301	4.91416	4.34174	4.66188	3.91286	4.97393	4.48177	3.72835	4.41904	3.75436	4.67639	4.90578	6.95275	3.40172	3.83705
UGT3A1	6.44082	4.04059	4.01735	3.85795	6.49621	7.65552	6.42141	3.68246	4.16859	4.18228	3.93054	4.8871	3.78536	4.08891	4.22689	7.62929	3.92167	6.42087	3.86395	6.07552	3.98365	5.56303	3.85069	4.02409	3.75635	4.01577	3.92356	5.44269	6.18776	4.00247	6.0316	4.48421	9.41134	6.67928	5.54893	7.06786	3.73821	5.13138	5.70422	3.93196	3.85541	3.71963	3.99057	4.27971	3.88629	4.07194	3.90777	6.83552	5.62424
PCOLCE2	9.8046	8.5713	4.72039	6.60138	8.63239	5.55009	4.52438	6.43978	4.13339	7.33169	9.98867	8.67911	5.03014	3.96187	7.11847	5.1543	5.13181	7.08707	6.78932	4.94774	9.17963	5.80881	5.90514	5.04838	5.72026	9.73385	5.47417	7.12023	7.68432	4.02348	5.29213	9.35974	6.99682	8.85223	4.71292	4.45001	6.14674	9.23883	6.22626	7.30361	6.83424	5.99686	5.85442	7.03854	6.21902	8.26252	5.11855	10.2292	6.46692
GIPC2	6.13086	4.46343	3.86615	7.57794	7.55337	8.56505	6.86996	3.86741	5.8697	9.08374	5.73534	7.703	3.4718	3.40172	8.28062	6.03869	3.51189	7.53081	4.21622	7.4743	6.54345	5.57434	7.66321	6.51433	6.87468	7.24519	4.99915	7.44868	6.52416	5.73698	7.4057	7.27496	5.83859	8.3729	5.93129	5.78866	6.93824	8.12066	5.82383	7.31203	4.57305	3.32123	8.2282	4.46665	3.93054	5.84295	4.38144	8.28133	7.95338
HPD	3.73562	4.78667	5.7925	4.92502	4.35372	6.59603	5.71863	3.62927	4.89268	3.67586	3.78166	3.78393	4.01554	7.86306	3.46409	3.97226	3.74556	3.86217	4.04359	6.25978	3.52404	4.06081	4.37983	4.98882	4.08425	4.59604	6.14843	6.28522	3.85367	4.26811	4.12033	3.94095	4.76336	8.88481	4.73065	5.90582	4.36613	3.90065	5.03944	5.00571	4.3375	4.2519	5.41455	3.82349	4.16639	5.28335	4.56974	4.48698	4.63584
COLEC12	5.29546	7.45868	5.69368	7.06857	6.34214	6.79024	9.74077	6.45132	4.85988	4.49045	9.86136	5.67786	8.03232	4.69123	3.79794	4.20647	5.47283	6.47025	9.3559	5.57406	6.23397	4.48031	5.03687	6.30837	6.47761	7.07663	7.84846	5.28447	7.8683	5.17594	6.25194	5.37462	6.87279	5.58505	5.65129	6.74818	7.19774	4.81426	5.05716	5.38421	6.18417	4.97586	4.6941	7.16867	9.84738	6.29412	5.37331	4.66834	3.87464
CXCL1	4.48559	9.15157	5.51803	5.37875	6.65281	5.0017	4.69558	8.76974	6.47788	5.8437	5.39547	5.18131	4.68372	5.35379	5.78384	9.60276	9.99111	4.82736	6.87915	4.66127	6.68627	7.78927	5.51856	5.0783	5.92502	9.51701	7.52135	5.8495	7.04344	6.11985	5.01547	5.754	6.43104	4.62861	3.91055	6.31999	5.44383	5.05293	8.55176	4.46888	4.57037	7.18497	9.3333	6.78746	4.57386	6.59603	5.33045	3.99747	8.21456
TOX3	3.78768	6.15357	4.43269	4.31652	5.27327	7.0803	7.69812	3.79284	3.68777	6.66709	3.83194	6.97803	8.36777	3.91808	7.11882	4.263	6.5479	4.93142	3.67375	4.29683	5.76784	6.03277	4.39118	3.7375	3.68317	3.66347	4.05426	6.79385	3.66157	6.23902	4.62118	4.15264	4.11219	7.00355	4.41607	7.72626	3.89767	4.32237	3.94469	5.71501	5.2453	4.18592	3.72881	4.10456	3.67841	4.7371	3.7697	3.53375	3.61953
IL1R2	6.57359	7.5496	6.51037	6.86004	9.9338	5.65039	5.99734	7.99396	7.2445	4.97107	13.0847	4.92329	5.04477	5.58715	4.26607	7.66886	10.6786	5.94719	9.69131	6.62382	9.0512	6.11756	6.95832	4.64396	6.10634	9.04056	7.20248	6.99844	6.43899	5.30718	6.61316	7.18212	7.96311	5.9039	6.21309	7.64382	8.47186	4.80192	10.5505	6.4722	8.61078	6.01973	5.99982	5.90561	7.53042	10.8931	6.28864	4.83724	5.35701
SPINK13	7.01242	4.33055	9.38724	5.47754	8.19592	4.56112	4.71374	6.49903	7.87027	4.36192	4.93164	4.64905	4.2121	6.23493	4.43699	5.99056	6.5391	5.19001	9.10788	4.39298	5.80164	4.40518	7.70255	5.13051	5.00992	6.50072	5.82287	7.44549	4.73004	5.4976	7.60026	7.54347	9.18421	4.09583	5.1645	4.76018	6.70429	4.37319	5.3253	8.54952	6.32345	7.55165	4.65364	5.21466	4.09828	6.28421	4.79083	4.53242	4.28272
MAL2	5.2415	7.33242	7.01503	10.6175	8.96407	8.32476	9.15836	7.88531	4.48658	6.25804	3.63236	6.66935	10.1512	7.58709	7.68474	7.34549	9.66581	8.71744	3.52629	7.2946	9.69971	7.38119	5.35002	7.37157	7.26148	8.05198	8.97285	9.17738	8.83224	8.81175	4.03939	7.42658	3.33906	8.87703	4.77855	11.2823	6.45132	6.29796	10.5297	6.28784	8.08017	3.26112	8.64898	7.17497	3.32065	8.73418	4.62507	8.8866	7.63632
SERPINA3	5.00215	8.70394	8.68143	12.7988	8.04186	4.82261	6.01809	10.2162	6.06158	5.10062	8.79052	5.18397	6.48822	7.66402	4.62923	7.49251	7.26255	7.38302	6.10331	6.28083	11.0771	5.66645	6.76154	7.7765	5.85591	8.55764	6.19971	6.45959	7.64518	6.90062	5.53991	7.73023	11.5123	5.86466	5.46663	7.07632	6.7923	4.76525	7.0618	4.99095	7.35068	6.5633	5.01924	4.91245	9.92935	6.20921	5.8122	6.02045	4.58174
A1CF	6.4634	4.19162	3.99958	8.01722	8.41102	8.03617	6.71772	3.85668	4.18248	8.82271	4.21942	6.18801	4.1191	4.11483	9.04404	6.72359	4.2154	7.00944	4.16124	5.31603	8.28806	6.81637	6.07277	4.08628	4.67456	6.78175	4.02409	6.28496	5.81597	7.21571	6.83552	5.93154	6.12878	6.97672	6.12576	5.13181	4.56397	7.50318	4.27371	6.98098	4.88129	8.503	7.37239	4.49085	3.86111	5.18108	4.07625	4.26056	7.63994
KL	8.94675	3.93519	4.28348	4.17667	8.02689	8.52367	7.28808	7.40191	6.99483	7.82885	3.60503	7.7998	3.51998	8.42662	8.77205	6.6839	3.1192	7.33511	3.91743	6.78962	3.98384	6.41706	7.90793	11.1479	7.21134	6.7887	6.64448	7.37771	9.6157	8.73337	8.04618	7.89409	7.61139	9.03036	4.19766	7.37498	5.8849	8.35552	4.92395	7.69463	5.86512	3.12554	7.88623	6.32424	3.4611	6.31198	8.86991	9.55822	7.85663
ANLN	3.85157	7.427	8.43925	5.41213	5.8466	4.75624	3.9036	6.34592	5.57052	4.78276	7.56053	4.97502	4.32647	3.5659	5.17485	5.71146	7.61098	5.36292	7.35416	4.41607	4.58377	4.24075	6.23243	4.19851	5.29905	4.90246	9.19774	4.79343	6.13329	3.75978	4.89416	4.27509	5.46432	4.95923	3.48292	3.62095	4.83665	4.86893	6.77727	5.41889	5.09108	8.12355	4.66436	8.23485	6.88423	7.06146	4.02858	5.01924	4.3691
LINC00887	4.74481	3.34774	3.41669	4.29642	5.74825	4.89999	3.84857	3.90021	4.82655	5.43496	4.43556	5.50591	3.16734	3.28964	5.96201	7.22117	5.13008	6.39599	7.9049	4.25642	7.10992	5.97945	6.49539	3.85367	6.11453	6.54845	4.38263	4.97001	3.78146	4.07053	6.8519	6.89078	6.65634	6.45709	4.69666	3.31524	5.37691	6.94106	5.01226	6.94447	5.71787	3.65115	5.45018	4.86662	3.24811	4.41274	3.81841	3.42993	4.53539
CEP55	3.50099	7.01951	8.02376	4.01975	5.96376	4.9607	3.99432	5.7973	5.21397	4.63378	6.49067	5.186	3.69988	3.15591	4.88212	5.2142	6.64676	4.65218	6.94415	4.67844	4.04318	4.4777	6.04239	4.0089	5.13446	4.97692	7.59727	4.13682	6.15791	3.70921	4.10456	4.22917	5.11989	4.06427	3.46849	3.55877	4.50363	4.08891	6.82194	4.43659	4.10158	8.25518	4.67618	7.84696	5.38214	6.78231	4.29505	5.60797	4.33016
TUBB2B	4.1191	7.44948	4.96886	4.23308	3.90065	4.20133	5.30605	5.34158	4.38552	4.02815	3.54446	4.0072	6.92546	7.44241	3.85475	4.18311	3.94639	4.06969	3.6222	3.97165	4.10602	4.02901	4.09418	4.91836	4.55433	4.22474	7.30945	5.34273	4.67721	5.81411	3.88802	3.56384	3.74327	5.09927	3.76336	5.80614	3.91829	3.69381	4.57801	3.90148	3.98926	4.22953	3.49672	3.75008	5.1913	3.92593	7.24299	4.11671	3.75119
COL11A1	3.64538	3.63723	6.50727	5.94994	4.7076	4.12823	3.69106	6.1526	4.73527	3.4611	3.83683	3.96721	4.1332	3.64894	3.60527	3.68035	4.04423	3.7136	4.25518	4.0816	4.91926	3.6461	4.38385	3.55703	4.83745	4.6	4.54496	3.75497	4.08138	3.71222	3.6801	3.60862	4.10801	3.67332	4.02348	3.57832	4.65364	3.75475	5.43151	3.75119	6.96831	5.48381	3.52933	5.46974	10.1342	4.7729	3.65736	3.60769	3.4856
HABP2	4.77185	6.23518	5.81861	5.77735	10.7281	7.93345	6.95594	5.07595	8.79304	4.65682	4.8761	4.92286	4.67478	6.08071	4.58055	5.94182	5.14834	5.29369	5.26499	5.04092	10.1512	6.32922	5.69542	9.3559	4.90019	9.10666	6.226	7.57494	5.42923	6.83831	8.38122	5.09949	9.94428	6.14722	6.09851	5.04263	8.84446	4.87396	5.45151	5.28226	6.46941	4.42449	4.82134	5.37964	4.51895	5.30718	9.27562	4.65408	4.79425
PCDHB5	7.2032	5.22764	6.38137	4.16584	3.83217	4.6526	5.40897	5.79321	4.96865	4.92179	5.85098	6.95594	3.6006	7.7836	4.43249	4.07501	6.87117	7.18037	3.8407	4.25033	4.02901	4.38203	4.33201	7.41586	5.40511	4.51798	3.98782	7.66972	3.68616	7.83863	4.0333	6.76786	6.28942	5.04908	4.02836	6.82194	5.77063	4.36394	4.3689	7.62795	4.95335	4.12986	7.08099	3.66818	6.72444	3.85089	7.21861	7.48683	4.33468
NUS1P3	4.72312	4.61805	6.36684	5.67924	6.53272	4.78418	4.09664	5.83984	5.67663	4.8592	7.49796	5.02301	4.14163	3.48873	4.14919	7.52052	7.01599	7.72802	5.73698	4.71331	7.31698	5.70042	5.75281	5.28269	7.89221	6.35793	6.70636	8.38313	4.80733	6.20949	7.94662	6.11732	8.15727	6.69922	3.98885	6.38691	5.36997	5.47089	4.2264	8.42862	5.07805	6.97119	6.22444	6.41732	4.4547	7.65111	4.59935	7.54509	7.93452
PPP1R1A	5.26563	5.60818	6.59771	6.1914	8.31371	4.91028	5.09927	9.40147	7.56361	4.09993	9.78789	4.20769	4.43352	9.69131	4.13778	6.06252	6.44534	4.72497	7.94101	7.61822	5.40853	4.51263	6.39093	10.1736	6.11806	5.88968	6.94228	5.9558	6.07897	8.5764	4.46361	4.63191	8.10725	6.85128	5.50522	9.34266	5.18775	4.2237	7.39067	5.07785	4.90288	5.53315	4.18111	7.12487	4.37195	8.84871	7.7619	6.24566	5.28492
ACADL	8.37998	4.12358	4.41846	3.64753	6.55443	8.62649	7.84502	3.64971	6.35605	8.82598	5.36864	8.6287	7.98519	5.73439	10.0843	7.12555	4.06281	8.35241	3.62003	6.86553	4.75875	7.51892	5.52574	7.16831	7.32377	7.86396	5.3489	8.08742	8.87074	6.54111	8.96407	8.09787	7.29497	8.77127	7.85471	7.74844	7.2632	9.2606	5.75169	8.82856	6.45817	3.83661	8.58898	4.68393	3.65783	6.34701	7.29833	9.77866	8.71819
MAB21L3	3.20815	3.22285	3.03102	5.71287	3.76472	3.6348	4.20329	3.02782	3.10959	3.39138	3.96782	3.13129	7.934	3.18575	3.17026	3.26545	3.10427	3.38814	3.07881	3.46765	6.09802	3.49459	4.43227	3.20966	3.30782	6.02985	5.82641	3.74624	3.28217	6.19647	3.08824	3.09244	8.49259	3.435	3.27437	4.00538	3.28389	3.13852	7.11064	3.16539	3.6404	3.28716	3.29247	3.50388	3.74761	3.34122	3.33877	3.74556	3.28088
EMX2	9.44951	6.89229	5.45406	3.49622	7.37498	8.77456	9.43712	4.02329	7.16063	8.27645	3.7373	8.27704	7.47266	9.66063	9.35974	8.08629	3.71544	9.07714	3.4361	7.26512	5.65409	8.4878	6.59196	8.97285	8.4084	8.25766	6.27903	8.4829	7.25005	9.12767	7.23339	6.81975	7.65071	8.85057	8.40576	8.83321	7.84211	8.09623	5.95677	8.43531	7.04662	3.15544	8.74389	4.8036	3.04996	7.99496	9.16726	8.71819	8.87338
PSORS1C3	4.10397	3.95199	3.67518	6.67222	4.18796	4.21169	4.25561	3.79419	4.24175	6.2216	4.01432	7.44586	3.88418	4.08039	5.754	4.58846	6.90786	5.47529	4.49595	5.2874	8.31925	5.19601	6.78932	4.22776	5.60725	4.53182	7.0756	6.72504	7.39606	3.95361	7.83265	5.20661	6.57976	4.63421	4.29447	6.7595	6.22082	5.72499	3.71428	6.9342	4.95859	6.68214	5.4721	7.58046	3.4364	4.06023	5.537	4.00538	5.0669
MIOX	7.78927	4.96196	5.42558	5.35561	5.82023	9.59787	8.46839	4.6265	6.2611	9.89371	5.0418	8.63691	4.78398	7.05313	8.10618	6.63441	4.52457	8.74452	4.69963	8.36777	5.34135	6.26191	7.50038	5.17503	5.91346	6.19089	5.73462	8.06758	7.35751	10.5932	6.10081	9.64385	4.44675	10.3752	8.46974	7.32079	6.94165	10.7206	5.47778	7.97001	5.11086	4.8815	10.5863	5.4522	4.829	5.94035	4.76254	9.9229	9.84162
CCL18	7.5817	11.0501	5.08604	8.54656	7.97461	9.48203	8.27402	5.7112	6.99088	5.45777	7.34401	5.41935	5.20934	8.74452	5.74803	6.22521	5.897	7.64216	7.31015	8.60564	8.3935	6.29208	4.9129	6.1643	10.8076	6.12589	7.34918	6.75205	10.335	10.5863	7.19249	5.3076	9.03917	4.81884	6.02517	5.79206	10.338	4.61888	5.98089	6.29932	5.01526	7.36212	6.02788	9.07603	5.96725	8.69447	5.44972	4.66148	7.72224
HSD11B2	7.47143	5.26385	4.6034	5.97945	6.12703	6.55161	11.1098	4.28835	6.59854	7.9461	4.36233	7.77694	12.2688	8.19058	9.04798	4.63356	4.60193	6.73072	4.48031	5.50615	7.51929	5.57078	7.3291	4.86893	5.56795	5.77063	4.12299	9.01064	5.64118	4.6136	7.56699	5.63056	4.63833	9.41548	7.53081	10.4102	7.4015	7.99801	5.42352	6.2645	5.60266	4.85358	6.26245	4.571	4.18631	6.11207	4.55905	5.12162	6.5708
PDK4	6.59043	5.65342	7.48353	7.03217	9.91231	7.49875	6.72683	5.54259	7.26904	11.4481	7.54305	10.2453	5.42352	6.7406	9.6522	10.6681	6.17179	10.9433	4.69246	7.95535	6.11132	6.20736	8.56206	9.17963	8.98414	8.85306	7.92694	11.3211	6.34933	5.11258	10.4012	11.8601	11.3408	12.7988	10.3263	11.1204	7.51853	11.5805	5.90222	11.6165	6.98836	4.60666	10.6142	6.92381	7.11814	7.68835	9.31386	5.90608	9.15377
SYBU	4.26117	6.94321	7.23011	8.76648	9.50633	5.83093	7.28986	4.6462	6.14441	5.1931	9.96713	5.26541	4.48881	5.29098	6.18417	8.54372	6.74119	8.47186	9.70169	7.5226	8.61387	5.30913	9.43426	4.81403	7.18463	5.24953	4.75432	8.31239	5.73534	7.59134	9.59289	6.51433	11.2496	5.6588	6.07575	8.68373	6.73431	4.50545	6.75629	7.04696	7.6707	9.48636	4.94562	6.7019	3.92528	9.16503	7.30693	3.95076	5.89549
NPY1R	5.74588	4.07789	6.88984	4.94989	7.13553	9.00576	7.49565	5.51879	4.88231	7.47474	4.41588	7.81224	4.61173	5.73026	7.21428	6.45874	4.91481	7.89022	6.23323	8.20937	4.64537	5.38509	5.67375	5.20468	7.78639	7.84164	4.9495	8.63166	5.3352	6.6758	7.55716	7.54305	3.70223	7.95851	5.88249	9.27695	8.49802	7.64341	8.00264	6.77873	9.82009	3.98823	6.37111	4.60234	3.66206	4.97347	5.96651	5.10707	6.99483
FGA	4.94305	4.45629	4.12015	4.30633	7.69009	4.30313	4.24573	7.98723	4.11462	4.07194	7.9178	4.05155	4.35891	4.5476	4.32728	8.38704	4.53201	6.3531	8.56701	4.00913	9.25075	5.09994	4.25364	4.24752	5.08427	4.51895	4.05477	4.35967	6.16585	4.42962	4.49248	4.10974	9.4592	4.13089	4.65385	4.26159	4.0319	4.13799	4.85897	4.13638	4.46223	5.77609	4.25909	4.00913	4.0653	7.21826	4.16738	4.23267	4.17889
COL21A1	6.88358	4.76504	6.95966	8.3316	4.79675	8.21222	6.59196	5.1543	8.32242	5.39319	5.29346	7.39685	4.00392	4.05844	6.32869	6.06828	4.51552	7.14582	4.32018	6.84391	6.99944	3.43528	6.02093	3.87211	8.31048	5.53099	4.18775	6.66709	5.0986	3.65302	8.48353	5.66101	3.71802	7.51564	7.43924	5.07722	6.45569	5.68139	5.76806	5.77324	6.0678	4.89438	5.72241	5.30605	8.29622	5.5255	3.61789	5.26073	6.26057
HLA-DRB4	4.85466	5.10018	8.48717	4.5679	7.05242	4.85529	6.18368	4.89696	4.8383	6.80001	4.84993	9.55526	4.46521	6.83392	4.5085	8.0819	4.64985	4.40562	4.44776	7.33398	6.69713	7.55043	7.49999	4.75805	7.42929	7.75123	4.51755	7.29169	4.55433	6.66995	8.23354	7.75349	4.69854	4.76958	4.81631	4.43269	4.43637	4.66684	7.52345	7.961	7.31319	6.6149	7.4076	8.34988	6.45488	4.77331	6.91228	9.03315	7.98358
C15orf48	6.64536	8.85947	4.87589	10.6243	5.27232	6.40211	5.05664	6.27113	6.19217	7.1631	5.50062	6.14117	4.72268	6.01311	5.96879	6.23346	8.55314	7.25077	10.2769	6.66101	8.04462	5.62004	5.36267	5.43905	6.49593	9.24482	10.3616	5.54156	7.24776	6.85435	5.41411	5.83352	7.38264	5.40759	5.75828	5.01098	7.20811	5.99734	7.98998	6.47108	4.65282	9.04404	6.83034	9.86521	7.25149	7.02352	5.5544	5.78431	7.56053
HCAR3	5.12773	6.47928	4.05093	7.37421	5.58058	4.06969	4.69349	6.05878	4.29071	4.03128	5.93105	4.75805	4.68414	4.30249	4.01494	5.99108	7.42821	4.0899	7.14055	5.13648	7.58296	3.84759	4.04296	4.03469	3.88979	7.5935	7.40338	3.87566	5.72474	4.1384	4.1222	4.37095	8.24433	4.15923	4.22799	4.3153	4.60623	3.81609	5.31235	3.82893	6.33168	5.52155	4.17867	4.72268	5.39839	7.66972	4.53416	4.82922	4.33239
LOC100130232	7.85905	3.68482	3.91525	3.54726	8.65509	8.34315	6.86553	6.0471	6.12088	8.95526	10.378	8.34115	3.98904	3.80679	10.1811	8.53159	7.57119	8.176	9.22366	8.26731	7.55248	8.0472	9.18077	8.08134	7.91985	7.36175	4.39416	7.93047	9.57711	5.99585	8.18066	5.93886	9.14925	7.54509	7.08065	5.22013	7.85425	8.04563	8.29381	8.61892	9.14824	9.05209	7.97622	5.28046	4.55454	7.68229	4.54212	8.80914	8.64372
LINC00462	7.17291	3.83286	3.89999	3.79038	8.42597	7.18603	5.92309	4.60999	6.46833	6.88606	5.46951	4.97524	3.68197	3.6866	6.33915	4.86579	7.51277	6.0948	4.35013	6.67192	4.125	6.08345	4.0288	3.65713	7.3659	7.18925	5.1543	5.45964	5.02215	3.75119	5.91078	3.81469	6.52194	4.77714	6.31147	3.56135	6.07107	4.83411	5.06602	6.22934	5.68467	6.34295	7.90982	4.18957	3.65882	8.09623	3.81862	5.28492	6.42273
FCAMR	5.15722	3.60648	3.57529	3.55149	3.92894	4.03958	3.73583	4.36028	4.39553	5.30512	4.15861	4.86683	3.47234	3.74351	4.51014	8.17488	3.52258	4.63356	3.57016	4.15405	3.75746	4.78835	6.81094	7.00877	3.7136	6.16229	6.06727	4.78604	5.56374	6.26992	4.06591	4.8931	5.26226	7.11882	4.01814	4.63853	3.63576	6.08736	6.72504	4.38406	3.98761	3.38291	4.94606	3.47578	3.57606	4.23628	5.01547	4.66045	6.90155
HAVCR1	9.28308	4.03695	8.08072	3.85006	7.69276	5.62121	4.16503	8.03939	6.56012	8.81258	4.52641	6.18829	3.3352	3.58267	8.73418	7.85855	7.85612	8.10568	4.19121	4.85549	5.18154	5.70164	7.78927	5.51596	4.29327	5.95137	8.82358	6.19367	7.11407	7.97312	8.25392	8.0264	8.07525	7.65337	7.90793	4.05197	4.11138	5.97972	7.28219	7.08333	4.60378	7.46279	7.80272	6.1214	3.57065	6.9852	3.51735	8.75766	6.28916
GPM6A	4.42128	3.96887	4.04149	4.08511	4.80298	6.533	5.34158	3.83311	3.98216	5.34089	3.70964	4.8931	3.68294	3.93609	4.98205	4.31511	3.76518	5.83256	3.72396	6.13207	3.91265	3.94159	3.93673	3.81598	4.91563	6.14674	4.62217	5.36569	4.71627	4.28974	5.33183	4.86289	4.28426	5.24846	5.43653	6.71114	4.93423	6.33037	4.34174	4.68192	4.98815	4.38004	4.54171	3.8588	4.15641	4.36634	6.54929	4.45412	8.46308
PLN	5.4155	3.67167	6.69985	7.36931	7.61613	8.59633	6.92348	6.01167	7.32039	6.29289	4.98987	8.05198	4.54742	4.09993	6.14291	5.30271	4.78856	8.62119	5.67072	7.1775	6.12524	6.00378	5.7157	4.66899	7.28986	7.68138	4.10158	9.01162	5.67568	3.81841	7.87685	7.70431	4.52762	7.7874	6.34781	7.88927	8.69531	6.70457	6.83361	7.14646	8.71182	4.72601	5.10285	5.04008	3.89281	5.85763	4.22577	4.74667	5.48685
MIR100HG	3.39592	6.41625	7.99904	6.81886	4.95882	6.79259	7.96154	6.54929	5.08427	4.90904	4.43455	5.49384	9.34665	4.02471	5.27185	5.05033	4.55989	6.56041	6.27353	5.95304	6.23188	5.76424	5.68209	5.8224	7.0173	7.46359	4.18734	7.05069	6.53826	4.05966	7.39995	5.61096	4.78105	5.74326	5.37896	7.67321	8.16576	5.20283	7.45951	6.10805	9.33619	9.20351	5.71267	4.5991	8.21165	4.70423	5.45825	5.14834	5.39092
TRIM63	4.15002	3.86656	4.02283	3.89725	4.19442	4.20372	4.00599	4.05928	4.27993	4.06081	3.85157	4.06741	4.07011	4.23855	4.28195	4.79654	4.00953	4.08669	3.98466	4.56315	4.16543	4.3373	4.14715	10.2638	4.15721	4.07132	5.18512	4.46185	4.11016	5.34632	3.92485	4.29447	4.36171	4.64188	4.20909	4.0218	4.03307	4.22169	4.13028	4.08447	3.88718	3.80221	3.93825	4.07281	3.88543	4.0319	10.7133	4.62259	4.23527
ESM1	7.18995	4.43556	5.61587	7.48719	7.92193	7.91674	5.72073	7.24087	8.21819	7.53935	6.20949	7.26255	4.26076	4.25015	8.00107	5.57874	4.3477	7.7249	5.15989	6.39174	8.11837	6.16968	5.34273	4.48983	8.12187	7.60419	4.90733	6.36438	6.9955	4.01389	9.24609	7.31129	5.31782	8.13246	5.59585	4.46102	7.48277	7.24409	6.19971	6.66445	4.64294	5.59702	7.05814	5.96699	5.62825	5.64687	4.71639	6.21052	7.47348
CCDC146	6.40621	5.34208	6.48594	5.9396	6.43815	6.80522	5.68875	6.39892	10.5534	8.48353	5.7946	6.76419	5.86276	6.94479	11.0096	7.95801	5.68588	8.49943	5.60266	10.2852	5.31845	8.46447	10.2478	8.10782	9.62879	8.77205	8.69771	10.7593	8.56851	6.96766	10.6681	5.91793	11.5546	6.40186	10.0633	6.79086	8.12475	7.62217	10.635	8.41944	6.57136	5.89524	11.6658	6.27251	4.65987	10.5473	6.01412	11.5988	10.5333
SPON1	9.53499	4.40722	5.82589	4.44591	7.90793	4.6034	4.18653	5.76761	4.04873	7.59264	4.11283	6.57636	4.37943	4.24995	4.38406	3.98384	4.14432	7.80225	4.82943	4.78456	4.01893	4.18332	4.65556	4.04234	6.62957	7.76009	3.96271	5.22013	6.28573	6.89871	4.18694	6.8232	3.99789	8.53078	4.39435	6.85972	4.91158	7.8688	5.18621	4.45453	6.73703	4.27993	8.69367	4.00147	5.39437	5.93521	4.1072	4.09299	7.89221
WFDC5	3.72052	3.88251	3.81642	4.19585	5.44591	3.59722	3.86952	8.08513	3.95179	3.80314	4.15264	3.72143	3.93498	4.0417	3.69447	3.66723	3.98592	3.46489	3.84643	3.97226	3.80633	4.18132	3.614	3.91808	3.68197	3.89979	9.50153	4.11501	3.88457	5.22147	3.85943	3.70873	5.55788	3.64682	4.35013	4.25808	3.56718	3.93519	4.70903	3.64209	4.56294	4.06548	3.72194	5.25047	3.78568	5.92865	3.7747	3.75087	3.82282
CYP4A11	6.679	4.74728	4.79824	4.74987	5.02237	5.57337	5.08386	4.56833	4.96978	8.49259	5.13873	7.24855	4.89332	4.83368	5.9105	4.94267	4.76504	6.33728	4.67681	5.11723	4.82196	4.99805	4.83224	4.73966	4.47155	4.76254	4.77372	6.77666	6.47953	5.17802	4.87717	7.25696	4.72766	8.67757	6.14645	7.37964	4.90403	9.08685	4.85313	5.44682	4.53558	4.72661	9.36243	4.6052	4.63378	4.80588	4.69515	7.80784	9.71274
C6	4.13069	4.5472	4.35429	8.24084	4.31753	7.39724	7.0463	4.15601	4.31978	8.7998	4.23267	4.93315	6.24161	4.38065	7.86976	5.08106	4.47833	6.32555	4.32604	6.45185	8.9989	6.36872	4.03879	5.21686	4.52216	4.55253	4.22496	6.84755	4.80024	6.89995	4.92585	6.36359	6.5377	4.38385	4.36331	4.92286	4.92994	6.501	4.38876	5.75121	4.52295	4.21375	5.01883	4.54007	5.77257	4.8631	5.78552	5.0913	5.51338
ADIPOQ	3.2141	3.05179	3.25011	3.57909	3.37733	3.32213	3.38845	3.21556	3.26674	3.19921	3.37174	3.24159	3.51505	3.55755	3.27437	3.57783	3.25075	3.28057	3.30145	3.47526	3.48317	3.27472	3.36519	3.20553	3.48586	3.25011	3.31239	3.4856	3.67071	3.45355	3.27922	3.35162	3.43442	4.74274	3.2388	3.41293	5.53243	3.49484	3.2409	3.37417	3.50072	3.33787	3.385	3.45303	3.4994	3.33216	3.64516	3.66371	3.41549
SELE	4.29033	3.49434	3.39195	3.49036	3.68271	4.74356	4.49004	3.98404	4.51798	4.84066	3.07341	4.49595	3.90466	5.8697	3.70617	3.39681	3.78655	3.98991	3.39021	4.18878	3.37504	3.67425	3.87485	3.33579	4.14452	4.00045	4.04318	5.04329	4.53287	3.43895	7.75027	3.52334	3.40257	3.50695	3.51557	6.32108	4.83893	4.15821	4.22008	3.80679	6.1914	4.75979	3.58342	3.91936	3.58188	3.67633	4.90019	3.28124	3.8162
NAT8B	6.43926	4.16918	4.27709	4.35989	5.06772	7.26942	6.035	4.1451	4.79902	8.67122	4.44675	6.83522	4.07132	4.29782	7.38909	5.19001	4.23161	5.34294	4.21334	4.97567	4.65408	4.63853	5.2355	4.26544	4.46726	4.6284	4.79041	5.66716	5.97405	6.08096	5.04992	5.22831	6.41054	8.2	3.93478	5.29007	4.46827	7.47191	4.50385	5.39458	4.16584	4.41314	7.98998	4.93547	4.37362	4.55433	6.06181	6.97407	7.60809
CCL8	7.33318	10.6462	5.12687	4.85056	4.56134	6.66965	6.30683	8.58898	8.01776	5.56819	6.95307	7.14826	4.55118	7.89022	5.12097	6.41104	8.04826	5.42673	7.80784	6.39458	6.23826	6.12676	5.2397	4.6	5.59563	9.04404	10.6425	5.76302	6.88517	4.35251	7.01858	5.68686	5.0783	4.47909	4.90496	6.92673	8.54509	5.11325	6.54902	4.98187	5.61359	7.85517	5.47507	9.43573	6.47928	5.55905	5.19241	5.43702	5.53409
AF070581	3.38617	3.85795	4.20411	3.91656	6.26397	4.13361	3.30468	5.12773	5.00593	3.52179	3.435	5.56867	3.11254	3.80221	6.62296	5.13895	3.31971	4.70087	6.19695	3.7428	3.96741	4.94886	3.52284	4.5607	4.25808	3.89894	4.36394	4.04149	5.37462	3.99873	4.3477	3.98739	3.46359	3.98803	3.09444	4.31834	5.13532	4.16402	5.63056	4.30613	5.86777	8.43326	3.37382	5.36997	5.4166	5.1401	3.42993	7.36252	4.51078
MLANA	3.70664	3.56916	3.5072	3.57212	3.44944	3.73845	3.59394	3.61715	3.57529	3.57188	3.5846	3.52908	3.57556	3.69239	3.67472	3.8083	3.62531	3.56568	3.73942	3.5373	3.64947	3.41376	3.53119	6.81856	3.6363	3.49883	3.67985	3.5659	3.34805	3.67307	3.43978	3.60648	3.65425	3.54058	3.55004	3.6348	3.61353	3.64801	3.64516	3.61133	3.73942	3.70456	3.59581	3.48081	3.535	4.50787	12.0457	3.97393	3.5373
MAL	9.75852	8.61892	7.92999	4.87803	7.55	6.91258	11.1695	6.05853	5.39297	5.90046	5.5994	7.46398	11.8861	9.8774	5.3237	8.69447	5.45618	7.04565	5.02149	7.36738	6.13233	7.39953	7.34437	5.8352	5.4313	6.83831	6.19191	10.1317	6.7887	11.3541	7.69812	5.28425	7.65673	9.22366	9.43282	12.0932	7.95227	6.62847	9.81021	5.61426	8.20755	4.93336	6.67874	8.53665	4.61888	5.63174	5.37199	10.0025	7.6835
CYP2J2	6.29156	5.0514	4.95512	9.39885	8.99494	11.1098	9.63227	4.71065	8.39858	11.2753	6.62873	11.1204	4.99311	5.26839	11.8473	9.58667	5.11193	10.4341	6.17859	10.1859	10.2532	9.71627	11.2887	5.08908	9.34529	9.74976	7.79453	10.7998	9.21392	5.83118	10.621	10.0424	7.33096	10.6897	10.7091	5.54916	7.87376	11.2689	7.22229	11.752	7.9674	4.95221	11.5893	7.8621	4.46707	8.00206	5.85197	9.25075	10.4073
CRP	4.27709	3.75391	3.70293	8.75766	3.81247	3.63121	3.69629	3.76877	3.74645	3.46051	6.44395	3.63211	3.73407	3.78416	3.98717	4.65113	4.29564	4.02283	3.74099	4.53395	11.9535	3.89107	3.67633	3.62883	3.58389	4.3353	3.6055	3.64516	3.82021	3.77243	3.71941	3.72606	6.26423	3.63603	3.87849	3.67817	3.68595	3.63942	3.5912	3.76608	3.74645	3.75076	3.70079	3.66863	3.77219	4.06181	3.78416	3.73583	3.76719
RBP4	5.22721	5.36136	5.20863	4.22188	5.69319	8.485	7.97055	4.46503	4.62923	7.63972	4.60978	4.48597	4.55391	5.46974	5.43222	7.73701	4.73319	8.30546	4.71007	7.35825	5.55349	4.41154	4.79083	4.57614	5.17059	4.57635	5.1822	5.7573	6.07649	10.2348	5.3237	5.90245	7.46984	6.45569	5.05942	7.18533	5.62283	6.06252	6.50387	5.11545	4.82261	5.87855	8.91399	4.79041	4.38591	5.61748	8.12756	6.59573	8.81175
RUNDC3B	5.59443	3.45133	4.12679	3.89193	5.15124	5.7217	4.23855	3.79106	5.3498	7.50554	4.76105	6.08295	3.88499	4.55196	7.95227	6.75983	3.92746	6.91387	3.68942	6.69863	3.87828	5.46126	5.39862	3.30661	5.73026	5.23055	3.98198	5.96725	4.1684	7.98148	5.52963	6.1574	5.65084	6.42247	4.66578	5.04285	4.05301	6.24669	4.21518	7.34123	4.42962	4.14919	7.13184	4.17262	3.79236	5.02645	4.00519	3.74785	6.80937
SPOCK1	6.78746	8.36199	8.71109	7.59091	9.7622	5.99585	5.76448	11.6969	9.75507	5.88075	10.621	6.89675	5.75236	10.9755	5.1737	7.58256	10.7715	7.49999	8.75601	8.45029	8.21819	6.45739	9.14394	4.36971	8.35241	11.1815	8.45224	7.92694	7.66488	8.25455	7.57673	6.35171	8.59773	8.32476	9.46067	8.22231	10.4679	6.11032	8.57715	8.04826	8.07742	10.8631	8.67442	10.9755	10.5731	9.57542	4.63378	7.74428	7.46279
ACMSD	9.70542	4.86433	5.20911	6.52575	9.47789	8.94771	7.49921	4.4153	6.7218	8.83321	7.57042	7.66577	3.57581	8.32299	8.60061	8.68143	3.67865	8.46839	7.96629	8.62649	7.33621	6.62266	7.56955	4.71584	5.2221	6.64017	5.36408	7.81224	9.0067	10.2427	8.45163	7.42123	8.50864	9.19653	4.2089	7.09461	6.25141	7.90542	7.11439	8.04462	4.32709	7.29348	9.07395	4.34111	3.35102	8.19708	6.02268	8.85575	8.95731
PIGR	6.30227	7.74107	6.6842	5.45062	4.76018	5.78193	6.64935	5.64262	5.31692	5.82562	5.34934	7.13383	6.07748	8.77891	5.16297	9.22704	5.63221	7.56225	5.10596	6.87749	7.45234	8.67911	6.04462	9.53499	4.84127	4.90457	6.81032	8.10349	8.72532	11.4037	4.7258	6.4722	7.47828	8.91115	5.5148	8.28877	5.77758	5.25986	10.1561	7.96468	7.30247	4.87527	5.51646	4.94433	4.67802	5.46432	8.13539	8.68143	10.1223
LOC101928554	5.37804	3.70196	3.45248	4.44696	6.18216	3.43725	3.48398	3.79722	4.9787	5.86422	3.34833	5.17503	3.54703	3.62412	6.00451	7.18003	3.48081	5.71787	3.36544	4.05844	4.00762	4.6729	5.59232	4.02203	4.76628	4.94246	4.93315	4.83411	3.87147	3.54011	3.85089	4.70065	3.75164	4.91481	3.59243	3.40257	3.91075	4.64478	3.99812	6.67222	5.48638	3.47869	5.95701	3.62389	3.4558	3.84031	3.80702	6.58984	5.06644
SLPI	5.89917	11.1871	8.6445	11.8103	9.98226	5.86491	6.32188	12.2506	5.71545	5.02258	8.55913	5.55928	6.73215	5.6395	4.92352	10.1368	11.6362	6.44725	7.47391	7.57838	11.1204	5.769	7.4912	5.44883	6.09353	7.68602	8.8479	7.49448	7.90237	8.90505	5.24368	5.37919	11.071	7.18212	6.43182	11.03	7.75824	5.36637	11.035	5.56399	9.27695	5.86605	5.22435	6.40211	5.96023	11.362	5.61334	6.68245	5.92211
LRP2	10.4988	4.84799	4.84628	4.21822	9.54753	10.4194	9.10788	3.72835	7.99244	10.7015	7.75305	9.47644	4.08688	7.83968	10.2453	9.075	4.16483	9.723	8.24084	9.26944	6.83767	8.39601	9.56445	10.313	8.19113	8.62943	7.87983	9.19308	10.1295	10.341	8.75683	9.22592	10.0983	9.95233	8.36199	7.22545	8.04243	9.8357	8.01278	9.62067	6.6946	3.64232	10.3473	5.55032	3.82872	8.52575	10.1223	10.3212	10.8249
BEX1	9.83401	5.02366	4.60296	4.52885	4.47282	5.03381	6.85435	4.30915	4.46482	6.63469	4.98509	8.14284	4.50545	9.40147	4.75131	4.78521	4.76484	5.45941	4.98443	3.90887	4.98104	4.62566	6.11255	7.25005	4.62756	4.62279	5.42464	6.31357	4.3477	6.53021	10.2058	5.24413	4.79824	5.92259	4.91541	6.98032	4.60126	8.13246	4.52515	5.50569	4.78999	4.4227	4.68581	5.02127	4.68599	5.24436	9.91231	4.48257	4.72962
SHISA3	7.20811	4.38832	4.9454	3.88397	3.72584	5.0131	4.21882	4.40159	4.20094	3.73821	3.53939	4.3573	3.80724	4.22953	3.85199	4.3527	3.64161	4.53201	3.80152	5.03381	4.01534	6.56359	3.84922	4.0074	4.7763	5.18621	3.62024	4.83498	4.02369	3.86238	4.60708	4.51815	4.49927	5.10619	3.56843	7.40985	5.11855	3.9832	4.08788	3.92126	4.48822	3.61182	3.74807	3.68732	3.64301	3.94491	4.16247	4.39215	3.84403
FMO1	8.95638	4.39277	4.30574	6.44133	9.46619	9.63395	8.39858	5.37691	7.76773	9.68269	10.6142	8.97468	4.81631	5.52269	9.18077	7.88382	4.648	8.23904	4.93249	8.4156	5.47258	7.27785	8.87164	10.4465	7.34203	7.42313	6.82069	8.84871	9.12311	10.0288	8.92818	7.20666	7.37278	10.0378	6.65664	7.51036	7.05413	9.55526	7.06993	8.13416	6.27588	4.49639	10.4132	5.01078	10.0843	8.84446	11.5988	10.0983	10.3669
GJB2	4.76231	8.27164	9.32943	7.21826	9.79344	7.38604	5.65342	10.2688	8.96024	7.56699	7.26395	6.10909	3.67213	3.61013	7.06247	6.15791	6.80369	6.02241	8.26312	7.43842	6.85099	6.30149	6.11453	3.97415	6.24032	9.78076	5.98517	6.33009	8.97084	6.30174	8.13718	8.89435	8.25392	7.44707	4.51158	4.63793	5.33381	6.68158	7.15401	6.51205	5.16541	6.05827	6.67222	7.99047	7.93345	9.06535	5.0514	7.75349	6.61551
DUXAP10	4.03795	6.26836	5.40046	4.27529	3.88418	3.57909	3.05053	4.46439	5.01799	3.9028	4.81447	5.10439	3.08721	2.91029	3.99139	5.1519	5.35491	3.39834	3.9112	3.25535	4.20627	3.97354	3.47869	3.13399	3.96229	4.26792	5.81743	3.43807	3.8224	3.01993	3.85753	3.87464	4.25303	4.02941	3.26179	3.1086	3.8823	3.47442	6.25062	3.69468	5.09179	3.89684	3.46631	3.65302	6.63097	4.12823	3.29514	3.16539	4.04104
CLRN3	9.35974	3.90908	4.47484	9.02834	10.829	10.1833	8.69447	3.60916	8.35047	10.2009	9.48062	9.69971	3.5548	5.11411	10.0091	10.3807	8.08454	9.98663	9.65079	9.68099	8.7806	8.20937	9.10238	4.71543	7.85233	8.54656	6.45793	9.68448	10.5863	9.48495	8.67836	9.54901	10.7091	9.20351	8.57002	6.05513	8.94397	9.2568	7.66199	9.43142	6.07327	10.2608	9.29301	5.31845	3.60377	10.2582	3.8891	10.9433	10.2638
SLC17A2	7.20771	3.90631	3.95778	6.57278	4.59504	4.91115	3.88607	6.26966	4.86833	5.9093	4.32296	5.87414	3.5563	4.74502	6.1985	4.63251	3.83683	4.72039	4.24293	5.23167	6.93291	4.36634	8.38833	5.12224	4.08265	5.3336	3.88378	5.56492	5.57384	8.55913	5.65249	4.7361	9.41282	5.28313	4.0333	4.02471	4.37217	5.73868	5.3291	3.98592	3.9112	3.68459	5.03036	4.01656	3.59822	4.37943	6.70603	4.71832	4.47282
DCAF12L1	5.92841	3.59513	6.11377	3.10811	5.63566	3.53987	3.36777	3.54209	4.90797	3.2661	3.23707	3.26577	3.82587	3.11969	6.17151	4.3234	3.43669	6.10805	3.28421	4.49944	3.3838	4.34891	3.32036	3.5031	3.3069	3.17978	5.93985	4.46971	4.03676	3.38527	3.22581	3.51114	3.80569	3.87505	3.39713	4.77435	4.54415	3.60132	5.17036	4.08138	4.11483	3.28389	4.89696	5.12119	3.51404	4.58456	3.45328	3.35555	4.82026
NLGN1	4.97457	3.36749	4.62673	4.52556	7.47022	6.18598	4.14163	4.49985	6.44478	7.75636	3.32829	6.57136	3.19011	7.13416	8.0747	7.73389	4.07876	6.96447	5.94135	6.92446	7.48471	5.65457	7.48315	5.3207	6.27144	7.02908	6.25353	5.24017	8.10404	5.65363	6.64536	7.07221	7.25696	6.65721	4.48093	3.98823	5.56633	7.5328	8.13476	6.94702	4.90754	3.24777	7.2647	4.60999	3.187	6.74847	5.21132	7.69547	7.20101
FABP4	5.76089	3.99452	4.46686	4.18835	4.25642	5.44817	5.57241	4.1222	4.41072	6.57022	5.18775	5.56351	4.91795	4.01178	5.6901	3.95509	4.54007	5.88319	4.31693	4.6375	4.47833	4.46143	4.41112	4.68995	5.84589	4.21436	4.3234	5.22058	5.65739	4.14163	5.37331	5.70657	4.27908	6.89903	5.32597	6.05587	7.05101	5.91723	4.1024	4.93737	5.84923	4.0343	5.9105	4.96196	6.75205	4.61826	5.35491	3.93418	4.7528
RP11-338I21.1	3.67167	3.78701	3.79722	4.94672	6.03301	4.50952	4.00309	3.76133	5.58737	4.03513	3.81697	5.25319	3.71776	3.83943	3.52933	7.39799	5.15407	7.39567	3.68896	4.45491	5.43108	6.52026	6.937	3.9782	6.35524	5.1737	5.47089	7.10923	3.67	3.83855	5.88851	6.89145	5.11281	3.9418	4.00001	3.87672	3.88565	4.18897	5.03816	7.17678	5.54653	3.99287	5.78025	6.1773	3.64064	4.58013	3.90148	3.82544	6.937
ADH1B	3.69239	4.51895	6.5814	3.70639	3.42043	6.25275	5.35261	5.70883	3.46516	3.98674	3.70733	5.37964	4.10602	4.17625	3.5485	3.364	3.49965	4.05546	4.82365	5.23232	4.00432	3.44471	4.8601	4.1987	5.2415	5.4664	3.4103	5.94451	3.92894	3.66135	4.51531	5.31381	3.44169	6.20681	3.53069	7.18675	5.85544	4.4282	5.73939	3.77515	7.40229	4.15204	3.81469	3.63552	3.5192	4.42801	4.04338	3.47657	3.80504
SLC22A11	7.72224	4.51136	5.48334	4.2396	5.99333	7.84846	6.77813	4.65324	4.40684	8.39417	4.51263	8.43531	4.1394	4.73338	8.64898	5.10396	4.48031	7.90394	4.70003	6.23646	4.24415	5.91942	6.02567	5.74539	5.5698	6.3663	5.03687	7.05446	6.11681	8.38251	5.96201	8.16525	5.49015	8.76892	7.43288	5.85949	5.65062	9.53644	5.2259	6.81451	5.02105	4.57221	8.27282	4.43042	4.17078	6.8254	4.97046	6.5747	8.71109
MMRN1	4.23036	3.20856	3.52554	5.90343	7.07221	4.09788	3.48535	3.37504	6.03032	5.91444	4.10974	5.40829	3.40455	3.21373	3.9532	3.70985	4.18858	6.06603	3.26674	3.70079	4.55967	3.34653	3.50203	3.17735	6.96699	4.54603	4.17406	3.6761	3.62531	3.07182	6.58425	5.67947	3.82392	4.65764	4.80171	3.99555	4.67105	5.95304	3.55506	4.40119	3.5106	3.25706	3.435	3.92441	3.93095	4.70337	3.49277	3.80546	5.06209
SCGB2A1	3.3945	3.55404	3.43528	6.68017	3.95695	3.57112	7.39378	3.33729	3.28587	3.48639	3.21961	3.50772	5.96251	3.54469	3.61353	3.38235	3.3519	4.82067	4.2519	3.51658	6.08394	3.29918	8.28806	3.37908	3.31581	3.60889	3.34594	3.7713	3.66206	4.04274	3.34922	3.435	7.66108	3.75305	3.80221	6.05464	3.71169	3.33817	4.73836	3.31939	3.61281	3.29346	3.53094	3.47633	3.18858	3.75305	3.26708	3.41376	3.86416
LOC145837	5.78238	3.68526	3.5893	5.53481	4.35193	6.6267	5.07117	3.70827	3.74761	6.83954	3.98761	5.4601	3.81469	3.82717	5.00282	4.47055	3.57188	5.04243	3.5457	4.04788	6.27483	5.20081	5.18174	3.55223	4.00995	5.47987	4.44326	4.58726	5.00204	3.73338	5.49246	4.1177	5.2874	6.50926	4.08968	3.97543	3.58342	5.04222	4.12803	4.34522	3.8355	3.59746	4.98815	4.79282	3.55429	3.86372	3.68058	4.2761	5.11921
LRRN4	4.05567	6.84332	4.52037	4.23977	6.25141	4.27689	4.25209	4.64188	4.22617	3.68595	3.96555	4.72766	4.17159	5.98638	4.20329	5.86422	4.03919	5.1691	6.4478	4.40477	4.48842	6.49708	5.63829	4.66229	4.04873	4.13659	6.74298	5.30848	5.32953	8.2282	3.91591	4.67824	7.08269	4.90904	5.35331	5.45544	4.38301	3.9493	7.13861	4.68128	5.12462	4.03573	5.0327	5.86751	3.98077	6.20634	4.06867	7.14514	4.22698
RP11-274H2.5	4.34133	6.71505	7.61181	7.05648	8.13416	6.15588	4.36071	8.59704	8.03283	7.42578	9.12767	6.67192	5.20038	3.67679	6.15357	7.77091	8.30307	6.94763	10.0748	5.75022	8.76974	5.57052	8.24665	5.32508	8.65979	9.27068	8.21819	5.26747	6.44673	4.83475	7.58046	6.49736	8.69209	5.45267	5.14725	5.41235	6.90621	6.25141	9.17738	6.48736	5.22135	10.1439	7.3965	7.09899	7.01917	9.22235	4.67085	5.64498	6.76391
FLJ22763	4.02919	3.36657	3.19885	6.92958	3.66092	5.34089	3.81664	3.13399	3.10427	3.6326	3.02849	3.11007	3.28455	3.30243	5.03014	3.13586	3.17468	5.00593	3.29411	3.67541	7.73789	3.45133	4.52784	3.29092	3.09137	3.20448	3.27143	3.7373	3.35707	4.58398	3.25672	3.20482	4.00188	4.35871	3.26275	4.03656	3.097	3.22469	3.83311	3.14515	3.12422	7.91074	6.36084	3.02978	3.15591	3.33366	3.14475	3.77557	3.41843
HHATL	3.97415	4.37217	4.39337	4.20769	4.44881	4.12435	5.51856	4.12435	4.25384	4.12076	4.25993	4.01136	4.11423	4.23427	4.04668	5.13467	4.65845	4.10098	4.59089	4.34341	5.08451	4.13819	4.37057	8.64523	4.02348	4.13758	4.86433	4.12358	4.26261	4.34522	4.07113	4.38876	4.52134	4.15405	5.37761	3.97478	4.04081	4.30087	4.29051	4.15223	4.52848	4.06846	4.12015	4.15621	4.47606	5.57005	13.2584	4.45957	4.13421
LINC01187	4.00579	4.07299	3.79284	3.8488	3.82302	3.70523	9.60904	3.7458	3.80679	3.65713	3.75955	3.81094	9.86136	3.72858	4.01756	3.7915	3.89067	3.85541	3.84316	3.89475	3.9057	3.66723	3.70964	3.69153	3.66252	3.62172	3.62763	6.6321	4.29963	3.65115	3.73583	3.90592	3.63701	4.76918	4.34405	6.05951	3.85069	3.69629	3.81334	3.83355	4.93527	3.88166	3.83462	3.84316	4.04767	3.64014	3.73918	3.9763	3.75454
GHR	5.52732	3.8891	6.36548	6.07452	8.08134	8.01941	6.71297	5.63404	6.26423	7.53359	3.73131	7.77329	7.69849	6.65546	8.88832	6.50131	4.07357	8.36897	3.97672	6.98293	6.89579	4.94172	8.12756	4.18169	6.54171	7.27231	3.47098	7.41141	5.60385	6.04759	8.88309	7.13791	7.12828	8.02208	5.83711	7.44008	7.80978	7.49722	5.27801	5.8766	6.27404	4.16104	7.44008	3.88822	6.66622	5.49715	6.99581	5.94796	7.08639
SLC17A1	4.74795	3.71941	3.67071	3.96142	3.68172	6.58286	4.81903	4.12555	4.10456	6.37136	3.64635	6.58257	3.51635	4.02732	8.13033	7.92949	4.44489	4.87027	3.78437	6.00506	4.1857	5.73048	5.63999	3.53193	4.3766	5.07421	4.05239	5.51574	7.94971	6.61007	5.08583	5.08493	5.22013	6.86157	4.80671	4.77058	4.61318	6.68657	5.39115	5.90095	3.47787	4.46381	6.36329	4.02471	3.5457	4.38282	4.26971	6.98458	6.44315
DDC	8.09101	4.47989	4.51634	4.15903	7.91327	8.15091	6.95966	4.29033	5.3076	9.41417	5.56089	7.70075	4.50262	4.94224	7.26005	6.41625	4.3728	7.49606	4.19766	6.30121	4.54496	5.39297	8.86991	8.97084	5.20863	5.49453	5.81998	8.088	7.22006	8.11223	7.69378	7.89274	9.2318	9.8142	6.04335	7.07695	6.24342	8.49595	5.30581	7.70255	5.41053	7.11504	8.57937	5.1831	4.20175	6.38775	5.3176	8.17721	8.34929
DEPDC7	5.60864	6.16129	5.4251	4.59441	7.76095	7.38639	5.38879	4.34405	5.43296	7.01664	6.25038	6.67222	3.01103	3.57703	7.68051	7.30172	5.80806	7.28219	5.5994	6.47625	6.47078	4.77608	5.55577	3.61059	5.48966	6.90253	3.84941	6.42166	4.67762	6.29264	7.48277	6.03918	7.53734	6.63843	5.61359	5.21154	6.55412	6.49766	4.97415	6.58651	3.82936	8.45296	7.05716	4.03795	6.38242	6.99352	3.9095	7.24698	7.31997
TCN1	4.27111	5.3352	10.686	4.77456	4.18071	3.81906	4.08138	9.80291	4.16878	3.80267	6.03653	3.74235	4.53923	4.49966	3.8823	5.56867	4.38508	4.06322	6.62847	4.24573	7.3432	4.21738	4.01367	4.28673	4.18549	3.91808	4.23225	3.89577	4.62716	5.04051	3.92615	3.94972	4.89223	4.01615	4.74773	3.79462	3.99287	4.07562	5.81647	3.79507	4.44227	4.5572	3.98299	4.0033	4.35332	9.03036	3.97354	4.30774	3.93825
RGS17	3.8261	4.93611	8.02263	4.19502	4.52885	4.16146	3.74603	8.05642	4.2467	3.96251	7.5733	3.8761	4.1851	4.37341	4.26319	5.14268	8.61607	4.50485	8.05963	3.96929	4.55924	4.20488	5.90631	3.8521	4.47687	3.96229	5.35586	3.89725	5.96325	4.33671	4.25581	4.134	4.06888	3.99222	4.30834	3.91286	4.31855	3.87211	5.0727	4.39999	4.4789	9.03227	3.71615	8.03725	5.94746	6.6041	4.11929	3.67794	3.98256
PAEP	4.37217	4.34522	6.41787	7.38191	5.22966	4.06023	4.23079	4.52827	4.15386	4.03592	4.67066	4.18549	4.1274	4.11403	4.00247	4.85336	7.34012	4.11403	9.35065	4.1924	8.19352	3.83726	4.41028	4.06969	4.21375	4.1332	6.54516	4.01262	7.37888	4.30292	4.14022	4.14043	4.11283	4.12803	4.75894	4.24154	4.12923	4.17645	5.74106	4.02348	4.19542	7.7227	4.42638	4.17928	5.25594	9.26824	4.1171	3.92725	4.44921
GRB14	6.70929	4.34446	7.98888	9.21748	5.81195	5.16955	8.98614	6.47352	5.73604	6.01927	5.5808	6.57664	10.5899	5.64143	7.16275	7.78405	4.05239	6.99154	7.70776	5.02971	7.78123	8.23231	8.50012	7.49643	5.62588	5.81975	6.12034	7.4876	5.76878	6.37317	6.91896	5.72241	6.87215	7.19143	5.11701	8.967	5.04371	6.66044	6.09577	6.5078	5.12924	7.07123	4.81527	5.96506	3.55824	5.94994	9.25075	5.47685	5.66478
CHST9	4.33055	3.91656	3.95199	6.35687	5.77979	4.17384	3.67985	3.4558	6.83865	6.23875	3.41433	5.37199	3.57631	5.92694	5.53654	4.17179	3.83876	6.71232	3.63023	3.47234	6.65664	4.94864	5.89137	3.52782	6.33808	7.58669	4.1803	5.06815	3.45496	5.25709	4.51387	4.24953	5.35446	5.05621	4.50707	5.55419	6.11184	4.6694	3.83705	5.8364	4.67163	3.86932	6.25646	3.51894	3.56409	4.02687	4.65556	3.4994	6.15588
PCDHGA4	4.1068	4.78211	7.33697	5.21241	3.99201	5.93227	4.84003	4.97826	4.7256	5.26586	7.27893	5.19001	3.99747	4.62178	6.21596	5.41235	6.93291	5.5155	5.14834	4.37057	5.00571	5.85021	5.50109	4.46624	4.80588	5.92576	7.87027	5.2415	5.43404	5.69618	7.18781	4.52496	4.53884	5.25072	4.84083	5.26656	4.47218	4.96239	5.83934	4.58055	5.27779	7.45234	6.88358	4.4235	5.59677	4.49185	5.84516	5.85468	4.18713
SLC6A3	8.42597	5.60032	5.03532	8.53665	8.03497	9.34266	8.23727	6.12653	6.03774	10.338	6.02342	9.98226	5.38305	5.30085	11.7303	6.17832	5.89377	8.67045	5.62259	9.75686	10.1295	10.5763	8.77715	5.26563	8.89699	9.38724	5.88417	9.85529	9.44519	5.45062	9.57061	8.93377	6.1985	7.89924	9.26944	5.42854	8.36007	10.3158	6.47928	10.9755	8.22635	5.3361	9.65711	6.13811	5.19241	7.63768	5.48803	6.90754	9.47644
KCNT2	3.94385	4.20447	4.60873	4.67143	5.21466	5.73823	4.21822	5.64217	5.68967	4.04832	4.15621	4.81193	3.43169	3.66608	3.97146	5.82263	4.55075	5.5902	5.48222	5.30939	7.42821	5.7358	5.47595	3.51295	5.66453	4.93716	4.58398	5.3336	4.3756	6.98458	4.66271	5.45293	4.26261	4.0818	4.03592	4.32917	5.06946	4.37964	5.53991	4.86158	6.30863	5.91274	4.69268	4.90733	5.63566	5.14416	4.13381	3.5846	4.13008
F5	4.46503	4.75216	4.35989	9.68269	5.99254	7.23917	6.94885	6.1013	4.34216	5.40689	4.46123	4.09564	4.34728	4.2284	6.71973	4.59665	4.47645	7.1028	4.65723	5.54485	8.88309	5.92162	4.49762	6.47274	4.23287	4.25725	4.69814	5.72192	6.27144	6.0316	4.32978	4.46343	8.81749	4.53597	4.31449	4.50769	4.39634	4.28613	7.20179	4.4797	5.10131	4.4451	4.28071	5.04928	4.263	6.40566	4.37741	5.90656	4.13741
SRPX	6.3208	9.29062	8.23174	6.47845	5.79679	7.77371	7.23658	6.78932	6.39865	5.40231	4.62158	6.27614	4.45812	5.68759	4.97305	4.3019	5.86701	6.96604	6.07504	7.39567	5.38099	5.41235	5.19089	4.82962	7.29531	6.34538	5.92405	7.75636	8.23422	4.75389	6.69542	6.838	4.89676	6.45214	6.62847	6.77269	7.76418	5.67115	6.84909	6.44809	10.1981	7.88434	5.157	5.45267	12.1254	6.39286	6.02543	3.78677	5.80283
IRX5	9.23404	4.57801	6.68186	5.21617	6.03966	4.42574	4.41353	6.18344	5.17131	5.67831	4.82047	5.66311	4.06867	4.22413	5.3482	6.76695	4.19811	7.33737	5.14638	4.26587	8.22578	5.66716	5.69155	5.10884	4.54843	6.83767	5.38856	4.42657	5.7657	8.06067	4.08265	5.60655	4.83808	6.80787	5.3393	6.77483	4.59564	5.80066	5.98615	6.17045	4.64229	4.05705	4.85638	4.81944	4.74646	7.88871	6.60945	8.16069	5.31119
EPCAM	8.79227	8.06477	7.58548	9.86722	9.59448	9.95444	10.0584	3.56183	5.84825	9.32031	6.26084	8.23231	10.3589	5.06904	9.15272	5.96325	5.47896	8.79885	3.67817	7.92242	9.86906	7.20988	9.43993	6.79115	7.22581	8.0441	7.01049	9.31146	7.69592	8.76011	8.33803	5.45754	10.4041	9.17859	6.99025	11.4563	7.25806	7.65381	9.4227	6.65634	8.02591	4.88877	8.94018	5.47896	3.63867	8.26852	5.61359	7.49796	8.6287
EGF	4.82536	3.59243	4.91158	3.91891	4.36171	4.01302	8.11384	4.02534	4.69537	6.25854	4.13919	5.09817	8.48153	3.80654	4.59665	4.71669	3.78857	5.06904	3.60794	3.62763	3.80546	3.53887	5.38121	5.16669	3.5192	5.68759	4.47707	6.85972	3.91979	6.46969	3.61835	3.9645	6.66191	8.04037	4.25263	10.4224	5.28425	5.27044	4.27908	5.39727	5.45084	3.87211	4.09809	4.19284	3.98256	4.63127	5.44064	3.46905	5.76619
SLC47A1	10.7593	6.61922	6.02883	8.90145	10.0748	11.5546	10.1271	4.58604	8.14339	11.0825	9.48775	10.7796	4.07236	10.0796	11.9829	8.39094	5.86138	11.1253	4.94456	11.5212	9.18421	9.74976	10.7875	8.67281	10.0264	10.0356	7.6498	11.1991	10.6715	12.1079	10.6752	9.6522	9.2581	11.1585	10.4926	8.48353	9.89987	11.2623	8.17488	10.8977	5.7552	4.27089	11.4037	7.10442	4.56631	9.29432	10.6425	10.4102	10.4558
PF4V1	3.05426	3.71522	3.12894	3.23321	4.94606	3.38177	3.05886	6.16077	3.54058	3.4347	3.01384	3.29314	2.93657	3.05303	3.09647	7.18427	3.08926	4.24075	2.98072	3.10052	3.49698	3.53753	3.32244	4.29921	4.66188	4.50302	3.91407	3.27173	3.4734	3.02588	3.50801	3.22179	4.92686	4.19523	2.88777	3.32183	3.16214	3.72538	4.39614	3.00614	3.05303	2.96095	4.90246	3.4135	3.19619	4.28592	3.49195	2.85762	4.63853
CCNYL2	3.44249	4.77541	3.49144	3.58857	3.42159	3.63821	3.4361	5.25047	5.53033	4.86136	3.46576	4.59047	3.70758	4.49126	5.75215	6.1356	6.88797	3.63307	3.64705	3.26448	3.64971	3.93845	3.96251	3.30628	5.63545	5.00215	7.16412	3.96079	3.46051	3.19354	4.33096	3.76242	5.6278	3.59168	3.33132	3.27076	3.86071	3.97457	5.1822	4.28091	5.90537	4.01055	4.22799	4.66086	3.71615	3.66633	3.24636	3.43895	3.58411
IL12RB2	4.49105	4.21923	3.72747	3.82784	5.44972	3.72419	3.88058	4.14328	3.79632	3.99099	4.79168	3.79768	3.71158	3.56691	3.92379	4.22008	3.51165	4.8015	4.23225	3.85519	3.3421	5.0131	3.66157	3.57311	5.881	4.19851	4.01554	5.1678	3.87211	3.59868	3.77538	4.11345	3.68942	3.67472	3.77538	3.64256	4.29182	5.06858	4.41807	3.75391	3.51788	4.04059	3.76855	4.53162	3.75862	3.82914	3.6152	3.80043	9.20925
CYS1	8.58898	7.0051	5.94746	3.75933	7.32494	8.93377	7.42972	4.12659	6.97999	8.42862	6.54316	8.53159	4.21882	11.0771	8.51827	8.2932	3.81576	7.87929	4.77916	6.83583	5.55602	7.85663	9.42569	9.49392	4.44696	7.34955	4.54234	9.02025	7.49681	8.25702	7.81504	7.12126	9.22704	9.22592	8.06589	10.2769	7.18427	9.2187	7.68747	8.41038	7.1071	4.24293	7.92746	5.62352	5.5118	6.52829	7.66972	7.70119	7.19957
MMP7	6.15331	10.6974	10.5797	10.628	8.23727	8.37871	8.37354	7.75075	11.1253	7.4372	5.27954	7.77233	9.29651	9.61073	6.27171	10.4772	5.65904	10.1368	6.5567	7.24121	6.32843	8.84973	9.04889	8.07309	8.49731	9.59126	9.30909	10.0748	8.56701	12.2862	7.13383	7.43523	10.628	8.74452	5.23167	11.48	9.47206	6.34618	11.9235	9.31023	11.2426	5.5567	6.96349	6.44264	8.97852	8.40707	6.22289	7.17678	6.94289
DCDC2	4.54192	4.87888	7.89274	5.73918	4.83599	5.74396	4.80212	5.93913	5.33255	5.35331	3.83529	5.46407	4.08911	7.67666	5.40465	5.83544	4.89503	5.41143	3.63188	5.5222	5.04731	4.72017	5.14119	4.29327	5.36683	4.79321	8.90588	5.44174	7.89873	6.13866	5.10373	3.60719	5.48565	5.01184	4.01676	5.92646	4.73086	4.57285	6.51179	5.23884	4.2156	3.64778	5.52313	5.33652	3.27986	5.2791	4.33791	6.02367	4.32483
MYOT	3.60429	3.25809	3.35467	5.37352	6.81126	5.0727	3.72584	3.13034	3.48873	5.69155	3.15292	4.02489	4.17324	3.86238	6.12803	4.08286	3.12748	5.60579	3.06329	3.93498	6.52661	3.89809	4.95033	3.64112	3.23778	4.75432	3.36223	4.79425	4.01136	5.65129	6.03576	3.80766	3.25276	5.37199	3.21192	3.48187	4.23814	4.92076	3.28389	6.44463	3.69892	3.30045	3.41641	3.43169	3.39167	3.72904	4.05135	3.35434	5.5902
CUBN	8.58672	4.47585	4.53822	5.44635	9.07822	8.67281	7.22901	4.92458	6.10054	9.23994	5.44546	8.5209	4.38322	4.49331	9.20233	6.20486	4.86392	8.57352	4.73549	8.35875	6.07552	6.71567	8.09036	4.46827	6.9632	6.71653	5.92694	7.66363	8.05588	7.74572	8.63471	8.66135	7.82363	9.18645	6.56678	6.70048	6.80399	9.01064	6.57803	7.34735	6.04734	4.58138	9.73028	5.60579	4.99783	8.55176	4.48762	8.82518	9.67413
COMP	4.08386	4.87355	4.43227	4.34405	4.12517	4.07482	4.42067	5.69319	3.86869	3.9966	4.01178	5.86875	4.73858	4.3766	4.1076	3.84815	4.61021	4.51365	4.52194	6.43182	5.04477	3.84985	4.92179	3.82654	4.46262	4.01615	3.82262	4.76148	9.03036	4.20213	4.01262	4.02836	4.16085	4.23794	8.41883	4.3479	5.13295	4.84568	6.32657	5.14482	6.5047	5.27348	3.83334	4.20688	4.90943	4.73192	4.00661	3.82197	4.17527
C16orf54	4.93798	7.39306	5.43013	4.96671	3.79306	6.38429	4.48278	7.98054	5.77711	5.16475	5.58528	6.68743	3.5002	4.03573	5.73439	7.153	4.61298	5.01632	5.22035	7.33132	4.06239	6.93482	3.5101	4.35592	4.74987	5.22613	6.23621	5.45406	5.8916	3.93498	5.21573	4.1218	3.67118	4.12279	3.41955	4.1435	5.89282	4.37422	6.13684	5.70471	5.32844	5.70584	4.80588	7.97055	4.10701	4.19018	4.81468	7.08269	5.5162
WNT5A	5.1288	8.66828	8.74389	6.2611	5.48758	5.75638	5.87807	5.51244	6.22677	5.10793	6.02194	5.02736	4.52678	5.20236	5.00107	5.74279	5.39884	6.3346	4.95923	6.08661	5.65928	4.87191	4.59339	4.78835	6.80641	5.94356	6.26245	5.53079	5.69923	6.71685	5.42394	5.85879	5.85468	5.55349	5.01779	6.84972	7.71716	4.98707	6.11427	4.75875	9.10448	4.49944	5.37691	6.01287	5.28695	5.6063	4.95221	5.14882	4.56588
SLC22A2	8.00591	4.90624	4.61847	8.37935	9.52005	10.3501	8.91779	10.0091	7.56699	8.46839	4.76	9.2069	4.51798	6.39067	9.67596	10.3557	5.52599	9.23994	4.63833	8.23231	4.39796	9.81814	8.39731	6.74877	6.79024	7.23693	5.58265	9.42708	9.29175	11.035	8.62722	9.00487	8.61607	10.1686	8.41102	9.1056	8.21578	10.6002	7.71989	8.51353	5.94232	4.39474	9.1177	6.87056	4.11648	7.81265	5.51157	10.0175	9.89788
LOX	8.08742	9.0941	7.64082	6.98836	8.58372	8.68909	7.5559	8.60708	8.78624	6.83034	8.95638	7.2548	4.19203	4.71543	7.06348	8.92723	10.5018	7.87128	11.0001	6.18495	8.34052	6.66622	4.43474	3.97693	9.20126	10.5204	8.43859	8.80914	7.65293	3.89067	10.0424	8.11223	10.2582	6.42166	8.82179	4.85466	8.99693	7.92143	7.39107	9.29778	6.51461	10.7635	7.38829	9.10341	9.12311	9.59126	3.99895	5.17932	7.60586
ZNF404	3.92061	5.0986	6.94348	6.52964	4.18755	4.17059	4.65599	4.19953	5.41979	5.10396	4.03089	4.41093	6.37667	4.7225	4.27709	4.38322	4.80383	5.80115	3.65279	5.51646	4.21663	4.03656	5.38235	5.79583	5.15833	5.34273	7.24855	5.71991	6.28059	3.23949	3.6504	4.19363	5.33139	4.22413	3.42392	5.09062	4.54356	3.57088	4.02665	3.68082	6.4951	3.85069	5.53409	4.53201	6.70457	5.10771	4.85746	5.98517	3.67375
FNDC1	4.17527	3.94868	7.161	7.01145	5.32889	6.15868	4.85723	7.19994	5.4395	4.38301	3.62927	5.69104	4.04212	3.77399	3.88802	4.06762	4.20429	4.57758	5.67855	5.87319	5.57125	4.31593	5.55277	4.01472	6.51291	5.03641	3.85089	4.89526	5.89377	3.79885	5.76829	5.73363	4.15346	4.83745	6.9367	4.43188	7.39343	4.63833	7.27605	4.49185	7.06993	4.29722	3.85178	4.3553	7.25769	5.84516	3.89536	3.65713	4.06929
AGXT2	9.1309	4.23565	4.55176	4.37381	8.75099	9.4509	8.14574	4.50066	5.7054	10.0772	6.14945	7.48033	4.73549	5.14142	9.88568	7.3006	7.36212	8.11671	5.66954	10.3589	7.0014	6.94165	8.47251	5.40161	5.94572	6.31385	6.17313	8.52026	9.55207	8.76335	8.31492	7.94152	8.59118	9.29892	6.98552	7.2537	7.36369	9.24721	7.59986	6.82161	5.42163	6.85405	9.64385	4.66578	4.3375	8.26494	5.02539	10.0112	10.0911
ISLR	4.23896	6.91543	6.68044	5.9487	4.31978	6.27225	5.62871	7.6395	4.37095	4.76855	4.78499	6.08394	4.82113	5.0197	4.37341	4.35831	5.71336	4.80983	7.05069	7.90184	5.95728	4.67885	5.91444	4.44757	6.48706	5.97723	4.38203	6.46635	6.44157	4.56504	5.31188	6.21544	4.58359	5.48334	5.77711	6.50527	8.34558	5.59491	8.26731	5.42533	8.93095	4.97891	4.68314	4.69919	7.2197	6.11932	4.47833	4.34111	4.58562
SCG2	3.74985	5.20225	6.76419	4.50026	3.80107	6.1985	4.56546	4.65048	10.1612	4.21985	5.58102	6.28138	3.57016	3.95569	4.41628	4.65364	7.14411	4.45231	4.37217	5.14098	4.72744	3.67985	4.77795	3.94385	7.38302	6.14117	5.14661	4.84904	6.23569	4.15326	5.85567	4.89438	4.02687	3.59986	6.6842	3.72881	6.54902	4.78748	4.88041	5.42464	4.41333	6.22934	3.83043	4.39756	6.21079	5.00924	6.70929	3.7535	3.59607
MAMDC2	3.90757	3.79955	5.72835	4.62098	4.21334	5.05557	4.00432	3.63121	5.33427	3.79213	4.012	4.17724	3.71449	3.55404	3.3637	3.25605	3.4877	4.37762	3.55655	3.7442	3.52309	3.58532	3.70713	6.72895	5.03816	3.98236	5.39297	4.96394	3.34745	3.47471	4.44306	4.58192	3.21704	4.45169	3.31205	6.29338	5.39658	3.9378	4.59007	3.8964	6.37424	3.66863	3.94342	3.97543	5.36361	4.15204	6.05128	3.25011	3.13496
SEMA3C	4.23308	6.60693	11.3541	4.43578	6.69628	5.43905	6.51911	8.63392	6.0822	5.41278	9.48636	5.30557	8.10887	6.33625	5.19241	6.81759	9.66063	6.16257	7.6359	4.93798	5.26408	4.87695	5.71241	3.77085	6.23518	6.77727	8.03989	5.86678	6.20274	4.78418	4.83475	7.15955	5.46974	6.43563	4.87717	6.33196	5.60772	4.76796	6.8936	6.03576	7.56053	9.15494	5.48916	7.33474	5.31331	9.15044	4.30774	4.31816	5.23861
EGR3	5.42787	5.02583	4.81172	4.95466	4.45393	4.84694	4.59585	6.5391	7.32569	7.84453	5.5262	6.93573	4.17989	7.49999	5.03425	5.15319	5.42232	4.4852	5.18397	5.36974	5.16607	4.95533	4.10119	4.29288	4.82383	7.68793	4.92627	6.26135	5.57896	3.60671	6.34728	6.34933	3.7136	5.04752	4.00167	7.17051	6.89391	5.89651	5.7401	4.75368	7.62839	5.08994	7.64937	5.34843	6.32817	5.07506	5.80806	4.78378	4.63232
CRISPLD1	5.14725	3.70964	3.7485	4.39196	5.31981	3.68459	3.54341	3.5373	5.50852	5.2874	3.33247	5.80375	3.3945	4.79632	3.7895	5.61887	3.17777	4.58257	3.64161	3.9528	3.809	4.79902	4.56294	7.87983	4.78708	3.19658	5.50946	5.31358	3.97924	4.52377	4.68001	4.52848	3.76133	5.01396	4.01115	5.23839	4.20052	4.65494	5.24172	4.51815	5.23595	6.65872	3.93713	3.92528	8.97559	4.56437	7.45513	4.18429	4.22089
ABCA17P	9.12311	4.79804	5.16031	5.04477	6.06349	4.67943	4.21663	5.90095	4.90733	5.2453	4.19663	5.18374	4.54256	5.28425	5.25204	5.36267	5.38191	4.4937	4.83116	5.78628	7.51892	4.28135	7.87477	4.65537	6.29289	6.18751	5.13008	5.00882	5.74346	5.10439	4.95923	4.75785	4.78769	4.54278	4.43536	4.79613	6.64676	6.19695	6.40432	4.77895	4.22799	5.6168	8.19829	4.34587	4.31071	5.8466	4.64396	4.95987	9.53359
CRTAM	3.55276	6.56882	4.75705	3.99452	3.96313	4.91158	3.92528	7.01858	4.88313	4.49495	5.81719	6.34187	3.34686	3.76764	5.20148	5.45918	4.80087	4.57244	4.67163	6.96831	3.89936	6.53329	3.65279	3.98466	5.06772	4.19811	6.26499	5.31425	6.23038	3.79284	4.19462	3.72767	4.30915	3.86049	3.75999	3.87379	4.91245	3.6822	4.86518	4.82216	4.08688	6.23927	4.63542	8.34115	4.73966	3.92808	3.96577	7.14787	6.20634
PRAME	4.48921	4.84608	5.45662	7.79074	5.9157	4.34607	4.33425	7.56993	6.14094	4.58966	6.6499	5.20403	4.5274	4.91198	4.29091	7.74613	8.87419	5.07785	7.34242	5.71886	6.19925	4.76628	8.10833	6.51857	5.45964	5.11767	6.96285	4.23508	6.48453	5.73604	4.94349	4.55989	8.27342	4.77876	5.08819	4.62448	6.20143	4.70947	7.03854	4.56608	5.81269	8.72452	4.4797	5.75568	4.8288	7.30097	6.62609	6.18909	6.74119
OLR1	4.64944	5.53589	5.05537	5.58623	7.30211	5.28647	4.17928	6.53213	7.04079	7.18359	6.21413	7.4011	3.9324	6.41026	6.56299	7.19812	8.57278	4.95399	4.13601	4.66519	5.35168	4.48901	5.09354	6.42697	6.85128	7.67836	7.9674	6.02068	6.69655	5.40322	4.48783	5.74637	6.0296	5.85418	4.20073	3.75329	6.98098	5.29927	5.90514	5.95478	5.17779	5.49991	6.15561	6.48902	5.47663	6.38691	5.4929	7.78175	7.27416
RAPGEF4	5.35379	3.87464	5.14834	6.53047	6.33781	7.14126	5.73363	5.28855	7.34584	6.42994	4.4227	7.13285	6.6393	4.02665	6.44588	5.51201	3.72675	6.56592	3.87038	5.34657	5.36637	6.51408	4.98987	3.45109	5.91321	5.05537	4.00024	6.43954	5.42163	3.35613	7.00912	5.08798	3.86783	6.22701	4.56751	4.7509	5.94994	5.9787	5.03708	6.48237	5.46596	3.63428	6.19319	5.24825	5.06163	4.91947	5.27436	4.07767	6.23773
BCL2A1	6.56708	7.8669	5.51316	5.71689	5.63174	6.14391	4.85746	7.47474	6.66768	5.57548	7.34955	6.20042	3.7375	6.84787	4.93015	7.35679	8.86818	5.97453	7.2632	7.55294	6.39433	5.69155	5.19773	4.69941	6.72389	9.05602	8.95827	6.09194	8.27826	5.83184	6.72837	6.19443	7.30588	5.15519	5.20424	5.13008	7.03013	4.32875	7.06048	5.96	5.10506	7.38951	6.12063	8.12413	7.04112	6.21981	6.6267	6.62638	6.43345
MAGEA6	3.46217	9.68269	3.36573	3.40368	3.30403	3.35401	3.54011	3.41265	3.24159	3.38349	3.31908	3.43556	3.5824	3.2591	3.70315	3.53626	3.2651	3.56666	3.29918	3.53472	3.53835	3.66069	7.27745	3.51035	3.3551	3.35584	3.56358	3.27891	3.40056	3.32643	3.54366	3.63428	3.5373	3.4294	3.38729	3.236	3.39891	3.40825	3.40114	3.674	3.33698	4.03551	3.40539	3.71522	7.96629	3.29546	3.34922	3.38992	3.42967
PLCB4	5.68514	5.46078	5.36158	4.26929	7.50237	5.69946	6.37238	6.57664	7.52881	6.50953	4.74523	6.39892	4.06404	5.14857	5.39591	8.23788	9.19653	6.96635	4.11972	5.98784	4.26665	8.12924	5.33953	4.00288	5.74687	6.19245	8.54876	6.07598	6.01738	4.45352	5.79608	6.78507	6.85033	4.84525	4.55176	6.13811	5.91298	6.32213	6.79876	5.07076	7.64382	6.00156	5.10815	6.5225	4.52074	5.8616	5.94035	8.79227	6.10805
HIST1H2AE	6.18163	5.59256	6.52773	3.47657	6.84575	3.91656	4.27764	8.03989	3.71473	3.62622	7.05276	7.48683	4.87273	3.87017	4.07011	7.25226	5.9113	5.11723	5.76641	5.67523	4.79882	5.42787	5.34112	7.63225	7.5813	6.49766	5.5935	4.43699	4.14777	4.1332	4.95335	5.11746	5.7198	4.70507	5.20468	5.43449	5.51059	4.98145	5.64831	4.29192	4.19564	8.04512	5.66716	5.41748	5.13826	5.09529	4.9974	5.76205	3.98446
CLDN2	6.16968	4.6958	6.74724	4.48901	5.3673	7.33819	6.34346	4.28387	7.53975	8.65832	6.2385	7.95023	4.48093	5.90757	7.96793	6.76244	8.0945	9.08374	4.25303	4.78876	4.20273	10.6566	8.23354	4.12397	7.26659	7.19423	5.74778	8.26312	6.989	6.49426	7.88434	7.65757	4.7528	7.62572	8.40707	6.68131	6.68362	9.36786	7.28289	8.29873	4.41028	5.03554	9.49392	5.56185	4.55905	6.54081	6.87439	5.11855	8.99494
TDRD9	6.80758	3.86324	6.51545	6.34055	3.47578	4.90818	3.65543	3.40945	4.03028	3.82852	4.0218	3.58558	3.69153	3.46877	3.6761	3.94139	3.88822	4.46503	3.69867	3.73773	3.63073	4.0033	3.41697	8.31796	4.00309	4.01451	6.65749	4.92926	3.91163	3.79816	3.39745	3.60402	3.89193	5.63103	3.55076	5.00571	4.02534	3.42744	3.63867	3.53298	4.77372	3.75656	3.44665	5.31538	6.54626	4.19481	6.07378	4.04443	3.81469
AMDHD1	6.48124	3.80459	3.76452	5.04392	6.88016	6.10682	4.19766	4.05197	3.87762	6.84391	4.4848	5.39203	3.44725	4.15502	7.30247	5.10462	3.50362	6.01167	3.54446	5.19001	5.64879	4.74127	5.04029	5.45685	5.32276	4.9737	3.77062	5.52313	4.0072	6.42777	4.79425	4.81005	3.6521	7.05682	3.53987	4.13724	5.38764	5.5994	3.89193	5.7365	3.58532	3.50467	6.41787	3.75815	3.83507	3.83441	5.33497	3.97991	6.41813
TCEAL7	7.22619	6.06349	5.25297	7.11706	4.6943	5.84541	4.17745	4.26222	5.43972	5.06209	3.68246	5.36933	3.4314	5.00149	4.90143	3.97904	4.11626	5.78768	4.56525	4.28426	4.92481	3.84178	4.95444	8.24026	5.94332	5.31259	3.71826	6.08096	3.67794	3.21373	5.89549	4.92627	3.64971	5.40322	3.36207	6.3663	6.28268	4.8761	5.46148	4.59544	6.60749	3.36865	4.04974	3.57212	3.70689	4.91991	3.68459	3.37417	4.78688
PDZD2	6.61836	3.89281	5.18909	4.37014	8.65751	6.92415	6.24264	4.79403	6.09577	7.75027	6.70692	6.51515	6.26941	4.03836	9.35724	7.08604	4.26419	8.44335	4.34321	5.43653	5.54302	7.04313	6.94611	4.77039	6.89841	6.61751	4.33281	7.73789	5.50223	3.93565	6.47108	6.94853	7.35029	5.84295	5.30718	6.29712	6.37531	7.30759	4.97328	8.26494	6.61892	4.1568	7.32456	4.71086	6.68333	4.74626	4.59276	4.0818	6.29875
RP11-999E24.3	3.28618	5.80685	4.43208	4.28934	4.35429	4.67416	5.50403	3.71244	4.39873	4.32094	3.60257	4.06259	5.66716	6.65018	3.63964	4.72312	3.28716	5.34066	3.75635	4.91094	3.79213	4.15326	3.9283	4.10897	4.01577	3.60862	3.38845	7.45234	5.36136	7.07025	3.86049	3.65497	3.72514	6.10231	3.34563	6.92251	4.24854	3.93887	4.11423	3.57728	5.3253	3.45248	3.83194	3.32276	5.25663	4.66333	7.3432	3.78036	4.40499
MTTP	3.34983	3.25605	3.366	6.66533	3.53119	5.83785	3.96658	3.16051	3.30564	3.28057	3.42856	3.12748	3.2269	3.10568	3.13763	3.72007	3.27374	3.54469	3.40338	3.48212	3.57455	3.27636	3.40338	3.37354	3.27537	3.42774	3.21887	3.33308	3.99287	3.86071	4.92012	3.19808	6.04239	4.26201	3.25411	3.66443	3.24022	3.52309	3.37296	3.29642	3.45383	3.80086	3.21042	3.22936	3.13177	4.4559	3.37792	5.07207	3.40172
GPR143	4.42555	5.03772	4.33239	4.81944	4.93096	4.92585	7.73111	4.27993	4.5312	4.08768	4.13442	4.23712	6.8971	8.33803	4.36008	5.15855	4.90246	5.49523	4.17847	4.87232	4.62923	4.99439	6.97374	10.1686	6.47681	4.54171	7.37771	5.38835	4.72962	5.65622	7.50957	4.43941	5.00414	4.53162	5.41028	5.64217	4.63461	4.12965	4.71607	4.56009	4.68213	4.39416	4.53023	4.00126	6.02342	4.82324	10.6142	4.78336	4.31613
CCDC102B	4.28426	3.47711	5.33587	6.3531	5.94572	5.79396	3.9028	7.0538	8.22289	6.02835	5.99957	5.76689	3.67723	3.33308	6.21389	5.3673	6.61551	6.51545	5.85468	6.75629	6.93543	5.85996	3.92421	3.35613	7.51036	5.615	3.91245	4.50404	4.83767	5.32756	6.2881	5.92309	4.34299	4.85207	5.7956	4.47813	7.41064	5.40667	5.51338	4.84759	5.11325	5.32323	5.05768	5.54583	7.47474	5.34089	3.2269	3.78349	4.88017
AK021804	4.03919	4.85466	7.97996	6.80031	5.60579	6.00998	6.71145	6.49287	5.25912	5.14482	5.40689	4.95964	10.1736	4.65473	6.21258	5.46687	5.15947	7.23224	6.13207	5.61218	6.66878	7.10749	6.31999	5.72619	6.92219	6.93605	4.4054	7.02015	6.33299	4.87334	7.33819	5.39568	4.96502	5.24436	6.01831	7.32753	8.41816	5.04477	7.38342	5.71812	8.48086	9.06983	4.90518	4.97758	6.48594	5.06231	4.85313	5.09732	4.9493
CYP4F11	3.46462	3.46822	3.76809	5.30512	5.40853	3.4734	3.4611	3.78036	3.78504	4.41807	3.47098	4.70465	3.49036	4.82655	3.55777	5.80806	3.79306	3.88933	4.79613	4.19851	5.81647	3.34268	7.10341	3.65973	4.24771	3.61451	4.67143	4.37463	4.3244	4.64781	3.79591	3.9333	5.97428	4.7642	3.47787	4.1248	4.16146	3.72098	6.5513	3.56039	3.80335	3.66092	3.32829	3.69774	3.4361	4.29014	3.45937	5.94646	3.50618
LIPC	4.47833	5.09223	4.62118	6.54541	5.28855	5.39226	4.93142	6.57052	5.5902	5.50922	4.16738	6.34346	5.12073	4.85141	5.13557	7.1775	4.69708	7.80878	4.54562	5.76158	6.1214	6.659	5.96677	8.22458	6.52496	6.50497	5.80928	7.28329	6.56708	10.5473	7.40607	6.91195	5.95854	5.75281	7.59113	6.57862	4.91795	8.00955	6.06006	8.85223	5.47663	4.65968	6.48153	5.31891	5.14769	4.98815	5.6407	7.64216	5.27327
PNMAL1	7.98101	7.34279	9.07086	8.2	8.61153	5.27021	5.45964	4.56213	7.04662	4.51613	6.87749	6.19217	5.17866	8.56278	4.00825	6.8238	4.12239	6.67192	4.32898	5.3731	7.87128	4.2282	9.33201	8.92906	6.81032	6.58001	7.80784	6.74969	5.68041	9.05009	5.95478	4.87191	7.23262	6.36601	4.28368	8.59704	6.36923	6.40566	8.2282	4.7902	6.23746	4.68062	4.32503	3.88738	5.69685	7.3291	7.94971	4.34216	7.34549
PSAT1	6.43845	8.34375	7.66886	4.50545	7.24485	6.71232	7.3283	8.02095	6.22573	4.17766	10.4435	5.18536	7.33697	6.29079	4.43352	8.31681	8.24367	5.31649	9.81601	6.74027	5.27757	5.02906	7.5108	7.51118	6.99025	6.03653	7.14959	5.40161	6.58257	5.88875	5.49666	4.64965	8.66592	7.71852	4.23508	5.71146	5.17977	4.67639	6.93976	4.91115	4.79487	7.17223	4.53457	5.97972	7.11137	8.72764	6.88423	6.11782	4.68746
APCS	4.39873	4.16503	4.31978	7.77091	4.5566	5.22523	4.7528	4.38897	4.40301	4.49165	4.20094	4.37401	4.33629	4.62985	4.25929	5.45382	4.43578	6.07921	4.55454	4.65805	9.92522	3.95013	6.12192	4.12098	4.26501	6.16457	4.70989	4.53884	4.52173	4.4294	4.65238	4.18332	6.92251	4.29306	4.2347	4.99873	4.13276	4.41134	4.25622	4.23448	4.25227	4.58521	4.09151	4.4496	4.54562	4.04649	4.34341	4.31272	4.06364
RNF186	6.37562	4.68476	4.87312	9.54901	8.59773	9.84929	8.62722	4.99074	5.2874	8.03232	4.69983	7.31733	5.00751	5.50201	6.28371	4.96865	5.17172	7.88531	4.59319	7.9178	8.87508	6.49823	9.02324	8.77547	6.15385	6.97705	5.8921	7.81687	7.54187	5.39932	8.35301	4.92458	9.66063	7.95072	9.06861	5.63588	7.11102	6.50897	5.47305	5.78796	5.3425	4.94795	7.36438	6.22417	4.84649	5.93034	5.2221	4.84083	5.49153
SCGN	6.98065	4.93885	4.77456	4.96758	5.32163	5.23431	5.2446	4.83347	5.8921	9.47068	5.18197	9.69802	4.9648	6.3237	10.1439	6.79508	5.06252	5.50946	4.82448	5.0783	5.17571	5.95555	7.10992	4.90839	6.13233	6.25486	4.96394	7.07331	5.50546	5.28534	6.75863	7.63632	5.06163	7.37498	8.25035	5.17172	5.51016	8.93471	4.75153	8.03836	5.11921	5.00215	8.98414	5.27531	5.25924	4.75516	4.73065	8.40976	6.57636
QPCT	9.68099	6.51745	5.96844	7.04696	7.71716	6.01663	8.0441	6.41267	9.03227	5.76641	5.46217	5.83352	5.75638	6.07552	4.71607	7.42855	5.69392	6.89391	4.97107	6.26499	8.088	6.7087	4.8138	8.49048	6.54626	8.84973	6.27877	5.30581	5.25476	6.34266	5.99082	5.63289	5.26563	6.08863	4.41668	6.63961	6.81792	5.88806	7.32494	4.90266	7.03885	5.5544	4.97284	8.00423	6.84877	5.48222	9.01258	4.6462	4.70214
IGLL5	6.38083	7.62444	7.43885	8.45709	5.69467	9.21275	8.25946	11.5293	6.33196	5.35999	7.96004	7.6204	6.03032	9.18077	5.39956	12.195	6.31435	6.21829	9.59787	8.57937	5.62049	9.0675	5.82263	5.77109	6.15972	5.77184	10.299	6.77028	7.75349	6.36158	6.60803	7.16731	8.33358	6.32265	9.15044	6.72004	7.75397	5.89401	8.94487	7.58256	8.11956	9.88568	6.5633	10.1391	5.76136	6.16023	7.44202	7.67836	6.84548
CTXN3	3.51869	3.48823	3.46822	3.61258	3.49827	3.50362	3.55777	3.28555	3.60695	7.18567	3.42528	3.51708	3.51708	3.51998	3.24058	3.62738	3.44169	3.59846	3.46303	3.51035	4.36375	3.3965	3.63211	5.77585	3.3838	3.54726	3.63701	3.64824	3.57088	3.71404	3.51217	3.51611	3.51035	7.05616	3.66069	5.25862	3.41089	3.40338	3.38729	3.55801	3.3406	3.43697	8.3729	3.38086	3.47471	3.39108	3.63	3.80335	7.22761
DSP	8.08072	7.16767	6.66389	11.015	10.0424	10.3158	10.0772	7.36738	6.08661	9.4592	8.89265	8.0687	10.5505	8.0467	8.43196	8.38122	7.09563	9.53359	8.40976	8.86211	10.8076	7.45868	8.76496	5.02301	5.45566	8.00478	8.63848	8.63541	9.90834	10.0046	9.0183	5.98638	10.583	7.91277	6.88922	10.2058	7.66929	8.22401	9.38441	7.58833	7.44668	5.71074	6.94045	4.64313	4.85876	9.2187	8.77456	9.6258	8.04134
NMU	4.16738	5.77063	5.60976	5.83886	5.26338	4.99632	4.44941	7.86537	5.47872	4.33832	4.68517	4.35509	4.50466	5.0418	4.15781	5.85394	5.99455	5.5243	6.26527	5.49569	4.92768	4.51575	4.35156	4.36929	4.59132	4.32256	4.78189	5.28855	5.32393	4.34092	4.52295	4.22953	7.56407	4.33949	4.02511	4.3728	4.58138	4.48698	6.18216	4.31351	5.16496	4.77249	4.3475	5.02561	6.68833	5.49105	4.37539	4.89887	4.38529
TEX15	3.48346	3.40825	3.52258	7.12451	5.2051	5.85926	4.4173	3.61881	3.53626	4.13819	3.40368	4.71543	3.54082	3.50072	3.79861	3.55097	3.54877	5.13735	3.36283	3.51378	5.90046	3.7078	3.61665	3.55582	4.25015	3.99494	3.41089	5.56068	3.41781	3.64947	3.89475	3.63796	3.81269	3.47526	3.92167	3.41872	3.92083	3.50176	3.35338	3.73452	3.59961	3.41752	3.55123	3.37033	3.38057	3.49855	3.46603	3.40313	4.9454
LIPG	3.85241	6.54374	5.23345	4.77876	5.65505	5.1645	4.42026	4.45253	5.86947	4.10741	5.27822	5.63035	4.00762	3.63845	4.59421	3.98098	3.83616	3.83919	4.5677	3.95032	6.50581	4.51116	4.6265	3.87422	4.33239	5.27327	5.54583	5.98711	5.60266	4.36493	3.65996	4.28113	8.25035	4.96031	3.84469	8.2661	4.48762	5.09223	6.01144	4.25703	5.35631	3.72328	3.70523	6.14769	5.78721	4.26811	3.67284	4.65343	3.66466
PMAIP1	5.01505	6.95627	5.91152	6.85716	4.92686	5.08147	6.27066	5.60888	5.7573	4.67329	5.19578	5.74997	8.84446	3.94972	4.44267	6.11377	6.33599	4.87438	5.31538	4.76918	6.26891	5.69923	3.83151	5.43517	5.35586	4.95964	7.02513	5.2241	6.6839	3.78973	4.89718	4.82047	4.41826	4.22878	3.87275	5.79346	5.27279	4.63232	6.06958	5.11831	4.9737	7.83174	4.23527	8.44264	7.64216	5.21219	3.69867	5.56795	5.12574
C8orf4	6.70106	7.91031	7.24519	10.4743	7.08236	7.86052	9.46067	6.1371	9.55526	7.74661	6.25393	7.5088	8.75271	6.25978	6.11007	6.32951	5.6831	8.94866	5.32889	7.934	10.3894	6.47302	5.41455	4.2035	8.71109	6.81542	4.93991	8.15207	6.97637	3.66748	8.04088	8.00955	4.07281	8.176	7.4432	11.0825	8.56572	6.71387	6.74515	6.71772	8.72605	7.02773	6.92892	7.69849	7.70955	5.89944	5.00946	4.9416	5.96603
CLIC6	4.73024	6.0518	5.33542	6.1311	9.41548	5.42352	5.49546	4.84105	4.55989	4.21457	4.50728	4.76316	4.73213	7.09563	4.12299	7.86104	4.34072	7.24972	4.5145	4.9414	4.45649	6.85003	4.31816	4.76588	5.75801	4.85876	4.35631	5.77711	4.71353	6.99383	5.55602	4.86415	5.13401	4.78793	4.79168	6.45293	6.36712	4.34932	7.06857	4.85424	6.02268	5.73868	4.24535	4.20012	4.16146	9.62067	4.91311	4.49762	4.51694
DAPL1	4.76525	4.56525	4.09379	4.2849	4.24218	5.49177	7.42503	4.44002	4.4018	4.16918	4.32524	4.26501	8.56851	5.67399	4.09172	3.91568	4.46562	4.58665	4.76484	5.3498	4.29722	4.61064	4.40762	12.9767	4.23712	4.24415	7.53935	4.54256	4.81674	5.32866	4.3857	4.32544	4.98553	4.1851	5.70333	4.49432	4.25403	4.30593	4.41865	4.52074	4.93164	4.01014	4.5603	4.3579	4.58521	4.81026	12.3418	4.54171	4.81509
LOC101930415	7.64301	6.93856	5.58574	6.26397	5.9558	7.27893	6.27378	7.04079	7.14685	6.77331	6.95761	5.33427	6.05666	5.27845	7.7249	6.82597	5.99611	7.45951	4.88313	4.8635	7.6178	9.63227	6.72979	6.88764	5.74613	4.95378	5.48286	6.43073	6.54902	7.37613	5.73628	5.46455	4.48358	4.88191	5.65573	5.30939	5.62707	5.10396	6.98929	6.9464	7.07025	7.21761	5.34045	6.533	7.58504	6.78444	6.39067	5.22677	6.67192
MEST	6.91962	6.57693	7.40607	8.7382	8.88481	7.6395	6.54626	8.65832	7.14445	6.52026	5.84825	6.40376	5.08692	9.57061	5.14311	6.27693	6.89965	5.80928	6.9193	7.35861	9.09082	8.39094	8.43326	6.94671	7.87027	6.42166	7.86537	7.98303	7.52836	9.58667	8.38061	6.12878	4.51136	8.41299	6.01809	8.35047	7.99091	5.82759	8.28554	4.90518	8.64599	7.47911	8.04563	5.37352	7.14411	8.71109	5.53942	5.96651	4.85207
TYRP1	3.25777	4.61994	3.20633	4.87417	3.03907	3.40681	3.15844	3.19275	3.05247	3.0745	3.16539	3.07341	3.14214	4.6694	3.10619	3.28746	3.78901	2.97828	3.21042	3.17621	4.92138	3.22761	3.85583	3.29546	3.09952	2.96014	3.08036	4.12118	3.07019	3.07985	3.12602	3.08192	3.27827	5.03944	2.95169	6.60057	3.07715	2.98897	2.89602	2.96778	3.31701	3.12748	3.13264	2.90665	4.10623	3.46849	10.0748	3.19158	2.87879
OLFM4	3.7185	5.53749	4.05071	4.93464	3.27173	3.38645	3.32467	3.33337	3.69082	3.34122	3.63576	3.35162	3.69679	3.44581	3.3256	3.26577	3.5811	3.26378	3.95951	3.74486	5.05854	3.09647	4.1847	3.30999	3.17068	3.44031	3.38412	4.91375	3.5548	3.13083	3.38469	3.36312	6.53329	3.66114	3.05364	3.66069	3.48239	3.51557	3.98077	3.25777	3.47284	3.45383	3.1878	3.30502	3.44835	3.34533	3.34416	3.52652	3.30594
GBP5	4.65494	8.53873	5.5703	5.05684	4.64396	5.70042	4.75304	7.54267	6.46775	4.85207	6.46833	7.64216	4.2546	4.22896	5.35423	7.6153	6.53071	5.37331	5.98958	7.20494	4.8761	7.19774	4.45023	4.71127	5.38901	5.65857	8.5216	5.76205	7.32456	4.46205	5.36546	4.97214	5.08192	4.8865	4.50667	4.8717	5.84686	4.53946	6.82101	6.00036	5.33587	8.10618	5.76424	9.71972	6.22547	4.64739	6.08096	9.34266	6.97902
CXCL3	4.34446	7.08137	3.80526	4.19203	3.96412	4.25787	4.0317	4.32175	5.96124	5.28805	6.85343	4.70947	3.87588	5.38305	4.77714	4.84066	6.27251	4.30795	6.95375	4.62014	5.85716	4.81234	5.68686	3.7354	5.05899	8.65265	5.81122	4.56134	5.02472	4.17117	4.33221	4.06969	4.19585	3.72976	3.77805	4.75601	5.3167	3.87672	5.53079	4.07482	4.30433	9.54753	5.96962	5.95304	5.6476	4.72766	3.90757	4.33363	4.85746
SUCNR1	4.48401	6.90882	5.16757	5.10396	7.05984	6.66101	6.15766	5.76497	5.85833	7.49523	5.65319	5.70333	7.37042	5.0362	6.533	4.38488	5.00128	5.71501	5.29636	5.26204	5.08471	5.47872	3.98343	4.22718	6.77331	5.53168	6.58677	7.16798	7.12726	4.76774	5.01716	4.9787	7.12414	7.14091	5.23502	6.0827	7.22265	6.40999	5.41189	4.66791	4.98041	5.05054	4.56751	6.12114	4.29091	5.2173	4.42801	6.37562	5.77562
AQP9	6.34985	7.66321	5.31305	11.8473	9.04101	5.44291	4.92903	7.92294	6.84179	5.03641	8.61078	4.95311	4.61098	5.20259	4.76609	7.70211	8.70164	5.82482	8.29381	6.39485	6.83092	5.04862	8.76177	4.8383	7.19143	8.73572	8.03128	4.9961	6.57136	4.91375	7.96204	6.1985	9.34135	5.71787	5.14246	5.754	6.75983	4.48114	7.07295	5.17346	4.65643	5.63009	5.67587	6.71505	6.68044	7.60851	5.55482	4.66169	5.96912
NPR3	7.22156	5.69344	5.20532	4.85943	5.66645	7.80317	7.00542	5.76401	5.38099	10.1512	4.88944	8.16815	6.05307	5.58433	9.84558	6.12296	4.62673	8.13246	4.96217	5.46974	5.20797	6.6387	9.08779	4.7959	6.50131	7.934	6.02618	7.94971	8.28744	8.01558	7.74979	7.54919	4.61549	8.69135	8.16124	6.80673	7.50156	9.04295	5.29836	7.3366	4.75496	4.50667	8.97285	4.72432	5.94646	4.75663	7.17859	7.63545	9.43426
NAP1L3	5.49105	4.17117	7.09704	4.54436	3.74215	5.7351	4.07338	4.94246	5.29007	4.7225	4.02283	4.96715	3.64374	6.41864	3.60889	5.95825	3.75143	5.07138	3.57909	4.67782	4.2089	4.19502	5.79321	8.78305	5.82431	4.20869	5.78581	5.68164	4.59935	5.41213	4.72622	4.78378	3.16862	4.81674	3.87038	6.26735	5.97581	4.42638	5.05517	4.09358	5.96844	4.55541	3.86529	5.11303	5.56633	4.74584	5.44612	4.41134	3.91224
DMRT2	3.91936	4.53617	4.06548	4.89503	3.89809	4.00309	8.59056	3.874	3.94034	3.8646	3.89913	3.99139	9.93577	3.87147	3.85303	4.05215	3.93306	4.01347	4.03266	3.8061	3.76197	3.91787	3.85199	3.79861	3.87566	3.81553	3.85324	5.75169	4.23267	3.69334	4.03028	3.99077	3.74145	5.10771	4.00247	6.72504	3.96845	3.91613	3.91396	4.06447	4.13659	4.08688	3.80129	3.92061	3.89913	3.80418	4.03857	4.01347	3.83616
SLC38A5	4.91991	7.63318	9.66909	7.81687	7.03818	4.53841	4.78315	6.57693	5.61981	4.29114	4.86071	4.5352	5.19836	4.71689	4.50525	5.85495	5.23253	4.90536	9.62879	5.66671	7.00404	4.60834	4.68254	4.44797	4.8109	5.26163	7.70776	4.80755	5.44361	4.41511	4.64661	4.70233	4.80854	4.67066	5.03772	5.07571	4.94433	4.73966	7.5136	5.03185	6.8025	8.98317	4.64498	8.26012	6.31275	8.74059	5.02992	5.05205	4.85812
ATP6V0D2	4.76062	4.79041	4.54356	4.74087	4.96845	5.74373	11.72	4.23773	4.28893	4.49411	4.49985	4.34426	12.4156	5.33381	4.30108	4.22953	4.62566	4.7038	5.41912	4.4797	4.55801	4.24554	4.4173	4.46726	5.08106	4.73689	5.28293	7.71716	6.37262	5.71787	4.57472	4.54585	4.95598	6.55728	4.25703	8.22057	5.07549	4.3523	4.44715	4.54927	6.03475	4.27529	4.43799	4.62385	4.77269	4.80298	5.01483	4.35509	4.64396
WT1	7.26762	6.15026	3.978	4.65303	6.44698	3.71473	3.99873	3.95905	3.83086	4.60254	4.39634	3.95549	3.70245	3.79932	3.81685	5.48638	7.82989	6.86865	5.55205	3.84815	6.78175	3.96374	5.34135	3.77805	3.73243	3.70733	6.1541	5.98663	5.74756	4.06948	5.00192	3.93034	5.57406	4.79213	3.90148	4.46223	6.1914	3.90086	5.96772	3.60719	4.33322	6.24903	4.68808	3.6521	5.13735	6.47329	3.84579	6.25953	6.11279
REG1B	4.85638	4.18917	4.3585	9.67762	6.67989	3.89452	3.91203	3.91677	3.99265	3.98612	3.63723	3.86071	3.78437	3.97436	3.78146	3.89789	4.46707	7.26512	3.92808	5.24689	8.18186	6.36948	4.30951	3.74939	3.61542	5.88612	3.85133	4.18858	7.21721	3.85241	3.71615	4.27631	4.03695	4.04255	3.87588	3.61813	6.8213	3.81709	4.99762	4.70233	4.01494	3.57754	3.72215	3.7704	3.93673	4.40928	4.29803	6.11476	3.57239
ZNF711	5.31692	3.34563	5.72786	4.09277	5.40875	5.80614	4.45917	3.8985	5.39273	7.22901	3.38759	6.97736	3.49383	4.82757	3.93418	5.58455	3.50772	6.19622	3.4347	4.52438	4.53395	5.37042	4.31593	6.30964	4.40139	6.52855	5.37019	4.8592	3.63284	4.96931	6.33886	4.87232	3.25177	7.11504	3.39393	6.57193	5.92162	7.16831	4.57364	5.88028	5.3489	4.20063	3.63	4.05726	3.53707	4.78667	5.49831	4.82859	5.97554
DPYS	9.32419	4.55497	4.40341	3.9172	9.53817	9.21631	7.97263	6.36385	6.63441	8.77804	9.78434	8.95922	3.95569	4.01534	9.16849	9.03628	8.4084	8.22458	9.47789	8.30609	7.3804	7.98054	9.20925	10.3073	7.97672	7.65071	5.33208	8.39417	9.20925	6.85624	8.88566	7.75777	10.7677	9.5614	7.38639	6.89579	7.61016	9.13323	8.6445	8.40776	8.75518	8.73257	9.26456	4.79902	4.04629	8.42008	5.80522	9.8774	9.46486
PDZK1	10.1462	5.64118	5.95256	9.69971	10.5731	10.7133	8.98515	3.76406	7.61357	10.8889	8.63019	9.88362	4.22878	7.18892	10.6073	9.28676	4.02348	10.6073	6.05079	9.9933	8.58003	8.84538	10.3501	4.7509	8.01834	9.48636	7.07997	9.8142	10.9338	10.7353	9.29301	9.04798	9.4466	10.7435	8.503	9.83973	8.06221	10.4403	9.4509	9.65549	7.67666	3.86741	10.4621	8.088	3.83529	9.30272	8.49457	10.6175	10.7796
AGPAT9	5.21263	4.09869	5.00282	7.13622	4.84927	7.10782	9.66226	4.17448	5.41432	9.05934	4.49205	6.09117	9.14925	5.61119	6.77148	5.49223	4.7235	6.9632	4.59979	5.34317	5.47046	5.42044	6.61033	7.26976	5.18557	6.28447	4.95311	7.26216	6.22313	7.65801	5.02194	6.21621	5.46663	7.27267	4.63044	9.03818	5.06099	5.50179	5.62121	6.31305	5.57708	6.01738	8.05251	5.00946	6.18368	4.93737	6.02761	5.80907	6.92348
TNFRSF11B	6.77424	6.24366	5.79934	5.186	5.42651	5.07332	4.07053	4.26544	5.2151	6.58257	4.5562	5.88756	4.09911	5.54536	5.36361	8.12924	5.10728	7.36438	4.4886	4.12555	6.02292	5.44452	6.2658	3.82914	5.11017	7.92949	5.78003	6.34959	4.94013	7.77138	6.35416	6.00875	7.43599	7.26694	5.46926	7.79217	6.40813	5.73363	7.10608	5.44452	4.7976	4.33651	7.3397	4.65517	4.14595	6.0503	4.2849	4.707	6.95499
TMEM158	4.83368	11.2823	7.56181	6.24134	4.67903	5.26185	5.505	7.78175	5.96174	4.58456	7.77791	4.95357	4.85358	5.08278	4.25539	4.56833	7.03385	5.02906	8.35241	5.30085	6.17313	5.06925	4.54029	4.21782	5.31826	6.70076	6.08494	5.83403	7.03385	4.85424	5.2627	6.58257	4.7256	4.82026	6.06227	6.27404	6.51911	4.65385	7.06651	4.89202	7.81741	8.61387	5.00215	6.35845	7.26942	7.41474	5.14834	4.35175	4.59828
RP1-93H18.6	5.21973	7.05884	5.10728	4.1662	4.2121	5.4	4.37057	6.80095	4.37057	4.71086	6.1371	5.08973	3.60208	3.64209	5.17664	6.88922	4.93336	4.14022	4.63006	6.66191	4.23586	6.41732	3.88293	3.61614	4.9853	4.41372	5.39773	3.9057	6.47382	3.62667	3.57286	3.86483	3.85541	3.46849	3.48134	3.96782	4.52848	4.18694	5.91102	4.84169	4.43878	5.3004	4.39196	6.11957	5.36091	4.05135	4.09237	5.31559	5.93497
SLC12A1	3.96678	3.90548	4.37804	3.79908	3.74829	4.15405	4.08768	3.88272	4.19564	3.89767	4.0526	3.86932	4.24335	7.98827	3.82479	3.78878	3.71776	3.71544	3.77332	3.98198	3.68246	3.80546	4.04749	3.70245	3.7203	3.68172	3.80985	6.43618	3.90652	5.0913	3.91306	4.00106	3.79484	7.22761	3.52179	8.85575	4.25498	3.80152	3.70502	4.22413	3.97226	3.83705	3.86071	3.85408	3.83855	3.73429	4.72641	3.72904	3.90822
S100A2	5.34703	9.97349	8.03617	5.62424	6.08638	6.24005	6.70664	5.72713	5.95208	5.5424	5.64523	5.02428	6.53851	11.2623	5.56255	5.62962	6.50872	5.548	7.30868	5.98089	5.24215	5.56024	7.44437	6.33009	6.09327	5.28805	6.40813	10.9433	6.34429	6.18881	5.42068	8.23422	5.06031	7.45353	6.03918	10.4073	6.92219	4.65195	6.15331	5.48518	10.7317	6.53329	6.55728	6.53187	6.75354	6.03082	6.50953	4.81761	5.56867
IL33	3.77962	5.81095	5.26747	5.33115	6.09067	7.29922	5.58996	5.78652	4.95378	5.48662	4.22413	5.66809	3.92167	3.60503	4.21759	3.74235	7.19994	6.98652	4.52457	4.9397	4.50046	5.13249	3.81403	6.25353	6.76244	4.85988	4.33445	6.24566	5.44883	3.97714	5.9653	5.75754	3.74486	5.17281	4.74751	4.65947	5.54893	5.98958	5.25776	6.03253	6.79783	6.25878	4.43516	4.89141	3.96163	5.00128	5.92794	3.94846	4.78584
VGLL3	3.32183	5.79487	4.98104	4.29071	3.47234	5.16496	3.80267	4.82962	3.94239	3.61059	4.47606	4.30334	3.21154	3.20633	3.38263	3.37821	4.99936	4.09172	4.52173	5.35098	4.58236	3.70293	3.61905	3.5452	4.96758	5.29882	3.54595	5.68946	4.43738	3.07934	4.14715	5.60484	3.41669	4.18189	3.20745	5.32142	6.12549	3.59071	5.06752	3.80702	6.39433	4.15163	3.33366	3.40425	5.74155	4.1024	3.24231	3.16453	3.39309
SLC5A1	5.80685	4.51575	4.37381	5.93352	6.47078	4.54049	6.26657	4.2745	4.53946	8.80573	4.38854	7.22901	4.76898	4.67204	8.14863	4.60646	4.57201	6.88457	4.43779	4.61866	6.33653	4.82365	8.00902	4.47198	4.47074	5.8364	4.5679	5.71383	6.50072	5.73337	4.82196	7.89824	4.89481	7.4057	4.68618	5.18512	5.30939	8.53368	4.41372	6.77727	4.96437	4.25663	8.18238	4.33791	4.46223	4.25581	4.42758	6.80031	7.84696
SFRP4	4.67416	7.22265	5.43678	5.74373	4.66333	4.35891	4.54049	8.06531	4.11812	5.22362	3.9729	5.5294	4.29288	3.849	5.32889	5.704	4.45649	4.2733	4.77834	6.49766	4.82943	3.79861	5.13488	3.66092	4.64702	4.45314	3.7354	4.81903	6.80369	4.17587	4.54585	4.33551	4.7419	5.50062	5.31305	4.67023	5.77781	5.25882	6.40868	4.68106	7.63318	5.09243	4.54153	4.20569	5.82287	5.8564	7.77839	3.78568	4.08911
FOXI1	4.60501	4.93205	4.30814	4.31753	4.31873	4.17137	10.0153	4.1498	4.39894	4.43779	4.27409	4.14082	11.1042	4.45752	4.46788	4.18549	4.75765	4.21582	4.37341	4.28592	4.17724	4.09358	4.21702	4.11038	4.39206	4.4402	3.93116	5.6407	4.47665	4.63833	4.29843	4.31634	4.59889	5.22435	4.7171	7.26434	4.36532	4.1568	4.3481	4.32583	5.46826	4.15223	4.2156	4.20467	4.13502	4.15442	4.10321	4.01893	4.32094
DDX3Y	3.48239	4.67143	6.43104	3.46462	4.86071	5.9142	5.52064	6.55216	5.75593	3.70804	3.60475	3.55076	4.20447	3.68573	5.15968	5.97602	6.43978	5.47233	5.62588	4.95837	6.51066	6.14769	6.68596	3.55801	5.25882	3.59868	3.54185	5.66429	3.43924	3.54161	6.3346	3.60916	3.5679	3.53042	5.79608	3.44776	5.62145	3.41955	5.28046	6.05436	5.74179	3.68573	5.04992	3.59269	5.5439	4.8383	3.51946	6.32633	4.97479
LOC284825	7.12794	4.30108	3.86761	9.11009	8.11492	7.33242	5.68514	3.46081	6.68017	8.05421	4.94672	7.46602	3.68128	3.57481	7.7573	6.49067	3.70315	7.81976	3.64301	5.98137	8.49188	6.34482	8.49595	8.96024	7.23011	7.8997	6.91133	7.58336	6.68158	7.78071	6.17832	6.14697	9.21991	7.20356	5.20775	5.93253	7.22866	8.14808	6.41651	7.70431	6.07009	4.34237	7.82363	5.71839	3.82479	7.47515	7.69232	8.7729	7.98465
GPR171	4.1488	6.54712	4.91416	5.60908	4.55273	5.73289	4.40499	5.16141	6.30039	5.71	5.57193	6.77301	3.99514	4.2463	5.48846	6.53021	5.52013	6.48343	5.80952	7.25622	4.98815	8.19177	3.98299	4.39873	5.4486	5.52755	6.94919	6.12165	6.21877	4.65029	5.65062	6.21052	5.3105	4.33832	5.03575	6.1773	6.09851	4.8305	6.3587	5.62469	6.18648	8.17423	5.30869	8.38502	4.86031	4.556	5.25529	6.60322	6.11007
SLC14A1	3.70897	3.62622	5.14857	5.8616	3.92022	5.87087	4.64821	3.84493	4.17928	4.21131	3.52728	5.03314	3.677	3.90191	4.93948	3.35495	3.51998	4.84403	5.09971	4.99161	4.47484	4.25663	3.70568	3.59722	6.10582	4.94412	3.98529	5.36223	4.19383	3.60989	5.42878	4.74481	3.40114	4.69833	4.66729	8.01886	6.26191	5.05726	4.72898	6.10755	7.41141	3.78612	4.9439	3.89536	3.36807	4.52701	4.20849	3.41872	4.4516
TNFAIP6	9.91873	7.21172	10.8333	6.16155	7.55965	9.40428	7.8708	9.21392	10.4435	11.0096	10.1956	10.4132	4.48842	5.02494	11.0452	10.5404	10.0935	9.93577	9.24358	6.18344	6.21902	8.19884	7.15369	3.81469	8.42797	9.09186	6.23978	8.29381	9.53067	8.99693	6.18417	8.53873	5.6831	10.1439	8.13718	4.77103	8.00362	10.6142	9.65896	9.17072	6.34856	8.24727	10.8549	7.5361	10.2505	9.17738	4.78814	4.99675	10.6533
PBK	4.01676	6.10154	8.09562	4.42574	5.68233	5.68334	4.47326	5.80614	5.38992	4.95945	4.86476	4.67741	4.74523	3.42187	5.10219	5.24665	4.96394	4.62259	5.59677	4.41865	3.69334	3.96187	6.63644	4.27292	5.27021	3.7428	7.19632	4.5991	5.2612	3.47657	5.03445	3.93758	4.38467	4.64251	3.3643	3.26212	4.56812	4.4294	5.14595	4.3539	4.0315	7.2647	5.12328	6.34132	5.65597	6.17445	4.18592	5.00437	4.32175
RERGL	3.60889	3.67425	3.8061	3.48847	4.97001	5.34453	4.3557	3.74123	3.80788	5.22742	3.58585	5.29007	3.82372	3.88145	6.15077	3.61133	3.34416	5.79777	3.40912	4.1152	3.47041	3.57783	3.8118	3.95569	5.16757	4.52641	3.34107	6.14415	3.65473	4.01302	4.28113	4.66127	3.72675	6.12827	4.87762	6.21569	4.28135	4.96394	4.0033	4.96417	5.70725	3.7166	4.75705	3.79816	3.8405	3.74145	3.28837	3.21261	4.13089
NAP1L2	4.49515	4.36233	5.65224	3.67911	5.73172	4.32058	5.81696	4.63523	3.58978	4.31491	3.65352	5.34066	6.28294	5.91872	3.68526	5.86253	3.35766	5.21175	3.52479	4.23651	5.60976	4.15963	3.34774	5.9765	3.77694	3.59347	4.2089	5.39839	4.72189	4.2689	6.28573	4.30932	3.30243	4.64721	3.4625	7.2197	3.78437	6.49796	3.98136	4.04728	4.20507	4.50545	3.47869	4.99957	3.45162	4.12576	5.25452	4.68599	3.4726
TXLNGY	3.62576	4.3857	6.08321	3.65376	4.64416	5.9125	5.3237	7.31619	5.68664	3.66092	3.67888	3.56967	4.14124	3.58882	5.71193	7.0024	6.52801	5.47706	6.13377	5.63566	7.26357	6.76903	7.15849	3.74736	5.44132	3.66045	3.6761	5.46826	3.65592	3.71244	6.36923	3.667	3.6593	3.59443	5.2082	3.59243	5.84122	3.65592	5.50732	6.18241	6.71653	3.75999	4.68128	3.63328	4.9454	4.38184	3.69727	6.80219	4.92746
RP11-369C8.1	3.51762	3.72514	3.606	3.66723	3.5963	3.5143	3.69702	3.81576	3.7561	3.68732	3.43781	3.48051	3.33849	3.48797	3.64326	3.4718	3.55053	3.52728	3.54469	3.40338	3.39309	3.75032	3.65327	11.48	3.62883	4.6941	7.1793	4.39177	3.70009	4.102	3.63917	3.59193	3.81598	4.1435	3.92061	3.64064	3.55097	3.70689	3.51788	3.59347	3.52859	3.70434	3.62576	3.65016	3.60208	3.5143	3.76357	3.53221	3.69798
ARG2	7.96004	6.37111	5.6084	10.1223	8.33927	8.551	9.24109	6.58228	6.20709	6.18624	6.24957	6.50527	7.34584	6.57106	5.34727	8.92906	5.22742	5.81317	5.21069	7.68602	7.21495	5.12665	7.62393	10.7133	6.58874	9.14057	8.03342	7.75397	6.68657	5.6686	6.62266	5.32778	10.9613	7.55165	5.59137	10.0378	5.67902	6.29875	7.36212	4.73024	4.65195	5.04202	6.81391	4.94842	7.42619	6.69955	6.43705	5.86228	4.92814
LOC344887	3.94765	4.13703	5.73892	4.29306	5.15384	4.03676	5.71359	3.60671	3.79955	3.8213	5.58407	3.69702	4.23388	4.94735	3.74145	6.65222	3.93157	3.65016	4.41333	5.26038	4.09952	3.70456	8.65832	3.94139	3.81774	4.47463	4.2284	3.93713	4.39177	5.32142	4.65682	4.06181	5.88731	3.84726	4.30354	3.78746	4.14043	4.58644	7.20421	3.86071	3.86952	4.46888	3.88457	3.87544	4.99331	4.60999	4.02941	3.85902	4.06762
ALDOB	4.68517	4.12299	4.63066	6.14144	4.61042	8.35047	7.77601	4.07132	5.52313	5.84075	5.44154	4.58706	4.79103	4.19746	4.60361	4.11262	4.11671	5.67546	4.19725	7.08365	5.85973	4.8036	4.16918	4.70024	3.98236	4.26441	4.7763	6.21569	7.09394	4.77414	5.78866	4.8478	4.48901	7.74844	4.59704	6.34728	4.26117	4.20094	5.24085	4.61021	4.15386	4.02622	5.4139	4.1086	4.20627	4.4008	4.19523	6.54957	6.26632
NUF2	3.2651	5.49268	6.63414	3.62432	4.54843	4.4006	3.52652	5.36819	4.62547	4.11563	5.48892	4.69558	3.46877	3.12289	4.72084	4.67701	5.08604	3.87544	6.16305	4.22109	3.83943	4.20031	5.7497	3.30749	4.6462	4.01367	6.23518	3.98529	5.22831	3.44389	3.87167	3.83311	3.76855	3.64112	3.30594	3.31581	3.92272	3.71776	5.44591	3.98991	4.18449	6.67024	4.00805	6.52993	5.58357	5.25047	3.35102	4.41967	3.96374
KRT19	6.01809	6.66795	7.08065	7.84116	7.36478	5.4522	5.0161	6.90501	6.12576	3.92638	7.55086	4.64125	4.89614	4.45511	6.01714	5.32298	8.02208	6.62819	4.22756	5.00969	7.53	7.44707	6.13966	4.46989	5.9255	5.79777	7.90288	6.61721	6.79145	7.45995	5.21594	4.88129	6.05749	5.46527	4.88313	6.98395	6.27042	4.85445	8.0612	5.28761	7.70255	4.58417	3.97693	7.11919	4.03391	7.42821	3.95361	5.96772	4.40402
SOX11	5.41366	3.69988	4.48379	5.10241	5.18197	3.68172	3.59916	3.80437	7.36133	6.67637	3.52703	6.0948	3.79591	3.70171	3.89684	4.58377	4.05093	4.80256	4.45532	3.97946	4.44041	4.2595	4.85529	3.53424	6.13254	3.8913	4.29269	5.72786	3.53987	3.667	6.35553	5.18043	3.66347	4.57305	6.95437	3.61085	6.63065	6.8034	6.15714	3.77717	5.76806	5.25093	4.36832	4.61152	6.6178	4.98772	3.61451	3.85858	4.17724
ASPN	4.52315	3.77085	8.22936	7.18248	5.97504	8.00206	6.45214	5.95353	6.8238	6.15634	5.64592	6.59279	5.34727	4.51654	4.55497	4.45691	6.69863	6.54737	6.26992	6.2113	6.51717	5.83984	6.44133	4.82471	7.21428	6.9059	4.69941	7.84937	6.14843	4.32627	7.23951	7.43402	5.03944	6.34592	7.81922	7.40607	8.93835	6.33915	7.3773	5.60818	8.52236	4.89802	4.3786	5.49897	5.62682	6.2622	3.86912	4.87717	4.78876
KMO	8.71027	5.44817	5.71313	9.8046	9.31509	8.3775	7.06921	10.0069	9.39152	7.85855	9.77323	5.66526	4.05197	4.59525	4.58562	8.77127	6.69628	7.60199	10.5534	7.41436	9.05209	5.49831	5.59326	4.48134	7.43444	8.04088	6.90312	6.05538	6.95405	6.2385	8.1941	6.07083	9.14495	6.54139	4.50302	5.43928	5.91819	6.78568	8.88566	6.69955	7.03084	5.21802	5.91622	7.0555	5.2627	9.60436	5.0497	5.90343	7.21861
C7	4.45552	5.73986	7.29023	5.51946	4.43309	7.49042	7.11571	7.62528	4.41865	5.36245	5.0144	5.61265	6.52332	5.4676	4.01034	4.4024	5.31119	5.21466	5.88151	7.49755	5.41122	4.47606	5.99108	6.78114	7.45399	6.15026	4.49004	7.68184	5.46974	4.55137	6.54427	7.28593	4.31211	7.22619	5.57526	8.11384	7.92294	5.50062	6.87981	5.03921	8.31239	5.12839	4.59665	5.1873	6.59367	5.69708	4.63602	4.08726	5.5406
PCDHB15	5.48199	3.6473	3.92746	3.50545	3.91372	4.34871	3.5989	3.98343	6.60749	4.22109	5.48685	3.97146	3.23286	3.29154	4.31491	3.78213	4.90713	4.24195	3.52453	3.48267	3.94202	3.52629	3.92505	4.05012	4.01222	4.53576	3.842	4.07132	3.65092	3.56843	4.48901	5.1351	3.30936	4.86833	3.20966	4.15761	4.2282	4.31291	3.66396	3.75522	3.95951	4.19018	3.86304	3.37997	3.66301	6.14674	5.62259	3.71449	4.49866
EEF1A2	5.40577	5.75353	8.52306	5.63428	7.3397	5.41432	5.74563	5.28112	5.16053	4.95706	5.17688	4.8592	5.64993	5.82312	4.93249	4.87148	6.71266	5.24128	5.80211	7.37654	4.7528	4.56483	7.01081	4.72876	4.8486	5.34586	9.15946	5.11591	7.43094	8.68909	5.34912	5.1953	5.1358	5.11966	5.6861	5.30848	4.94013	4.95598	8.23849	5.0144	5.24017	6.07921	4.98205	5.08516	5.32933	8.87969	5.13758	6.65281	5.58243
ZNF521	6.35712	5.19024	4.71169	6.035	7.59176	7.83078	6.39458	4.76568	6.85818	6.32817	4.12416	6.43926	5.14207	4.08929	5.31447	5.24017	4.4455	7.58917	6.71145	6.72062	5.73604	6.35605	6.41864	8.572	6.7433	5.89401	4.45373	7.01013	5.70979	3.68106	7.14022	7.36175	3.98644	5.96454	5.87904	5.05808	7.09018	5.98832	6.20896	5.58433	6.1526	4.88334	4.60792	4.89503	7.39267	7.96953	4.0899	6.43537	5.10793
PNCK	6.14144	5.30985	5.16275	7.55206	8.43196	5.48081	5.38282	5.26163	6.33491	5.43273	8.08353	7.40682	5.40875	5.63221	8.70241	7.53204	5.42764	6.46014	8.72605	8.10291	10.4894	9.69971	8.18531	5.27348	6.73581	7.55965	6.94885	7.62487	6.58031	5.22875	9.82217	7.66108	5.08451	7.26395	6.56387	4.96217	5.34273	6.75205	8.67599	8.58149	9.50792	7.96468	8.53873	5.56819	5.72002	8.59704	5.37109	7.20387	6.28626
CDHR5	7.69009	4.55137	4.61108	7.84408	8.05041	7.72975	7.00371	4.39853	4.82984	8.41816	7.1631	7.30282	4.64016	4.71976	7.41436	6.12852	5.8916	7.26357	7.76773	7.27088	7.69638	6.42141	7.72626	4.34565	5.1913	6.08889	5.11675	7.55043	7.85563	5.97921	6.35921	8.08742	4.55294	7.06048	6.95832	5.88945	7.3773	8.14065	7.84408	8.35487	5.14882	7.26904	8.01941	4.87888	4.47687	9.21991	4.5677	9.36122	8.17233
TCHH	3.95095	7.40034	4.75131	3.62119	3.56086	3.81511	3.62454	7.15567	4.34174	3.81288	4.47094	3.4922	3.50046	3.71941	3.68968	3.60769	3.96658	3.96741	5.11767	3.80679	3.55755	3.65138	4.07194	3.64466	3.86571	3.80129	4.47345	3.85027	3.53626	3.70033	3.7521	3.45303	3.71776	3.57138	3.58807	3.67656	3.7984	3.46409	4.14677	3.82282	3.74305	7.11882	3.51505	4.7229	4.5274	4.3426	5.92718	3.63964	3.67213
DDIT4L	7.59045	6.43563	5.44546	5.04456	6.20681	5.89896	8.98317	7.28219	6.40159	6.31435	8.28616	8.87164	6.82194	8.62794	4.54865	6.63961	5.21372	8.73181	7.75777	5.85269	6.56102	7.49606	7.27535	12.1254	5.0312	9.8877	7.35186	6.34805	5.66573	6.57524	5.88249	5.9098	6.19523	8.55986	6.91165	7.30478	6.23952	8.39027	5.44839	5.88464	5.62004	4.23565	4.59685	5.66173	9.39019	6.08965	8.30674	5.49313	5.37654
FAM81B	4.1072	3.1533	4.85291	4.33671	4.62819	3.88866	3.30812	3.52404	3.8646	5.32323	3.30628	4.16362	3.13446	3.39621	4.52335	6.16863	3.17978	4.1842	5.05642	4.28292	6.01809	3.85858	5.00024	5.71764	3.57606	4.85405	5.1253	4.64965	3.96313	7.33279	3.5932	3.37761	4.25808	4.50243	3.47578	4.3879	4.19442	4.49495	5.60655	3.32276	3.32615	3.31492	4.20569	3.235	3.20815	4.75805	3.64112	3.52962	3.91602
TINAG	7.83078	4.27631	4.27051	3.6801	5.20424	7.18141	5.72543	3.62975	5.37964	7.7573	4.77652	7.33934	3.77557	3.79017	6.99383	6.54817	3.83832	6.60945	7.3177	6.11806	3.71706	5.38555	6.6907	3.74645	5.11855	5.92381	4.48358	6.22212	6.70249	7.70473	5.93641	7.20248	7.92343	7.62839	4.92858	5.18888	4.93464	7.58461	5.29369	5.88564	3.82914	6.79968	7.80501	5.08192	3.88999	5.1519	3.72396	7.59134	7.20248
DIRAS2	5.88151	3.51088	3.40395	6.53242	5.28945	5.63289	4.54436	3.46713	4.4026	6.31223	6.16077	6.45624	3.70479	3.50441	7.10248	5.06273	3.34477	5.8364	3.27472	4.89824	5.75855	4.95663	5.61565	6.3509	5.54985	5.46148	3.90443	5.27888	5.52686	3.56666	6.19825	4.3481	4.76876	5.88899	4.70065	3.88889	4.49312	6.72979	3.96993	5.78888	4.26015	3.68639	6.04734	3.87232	3.38645	5.24482	7.98998	5.15855	5.90463
GXYLT2	7.12379	8.76416	8.43123	4.48401	7.00371	6.22959	6.19749	8.32049	6.93512	3.95778	7.53777	4.41052	7.7931	4.71127	4.13299	6.33196	8.14574	6.58228	7.69592	5.11701	5.2033	5.49105	5.19815	6.32922	6.25301	6.37054	5.65016	5.87783	5.75096	5.44635	8.33424	5.07549	8.65344	4.00975	6.1043	4.58686	6.28059	4.02941	7.04344	6.89743	6.24771	7.46483	4.40421	5.4092	9.94	9.02937	5.79013	4.38631	4.79967
TREM1	4.8865	7.3659	6.27016	5.43678	6.18801	4.69941	4.46521	6.27225	5.45475	5.36569	8.79631	5.14638	4.70315	5.67637	5.48034	5.64453	7.86929	5.22787	9.56293	5.63128	7.89363	4.29465	4.98707	4.67963	5.0497	7.77694	7.93949	4.51654	6.2501	4.67579	5.36179	5.64523	7.46034	4.90019	6.40975	5.38787	5.88756	4.61697	7.3219	4.90187	4.32483	6.28651	5.92283	6.56856	7.1064	8.21279	5.32002	4.16442	4.72474
SLITRK4	4.55761	4.26991	4.25498	3.46163	4.68128	3.69965	3.3695	5.91893	4.57285	6.77453	4.86559	6.36896	3.49434	6.39625	7.46602	5.52246	7.25226	5.43248	4.64144	4.34174	3.79397	5.23526	6.60351	3.90908	4.81447	5.96677	4.35989	5.5155	4.46686	5.61862	4.75765	4.46381	6.98293	7.13993	4.28215	5.74851	5.60952	6.41891	4.36493	6.19622	4.76018	3.34328	3.69679	4.43126	3.58783	4.67456	4.45571	6.98776	6.72444
RP5-1092A3.4	3.61304	5.10219	4.39853	4.38529	6.22261	5.82848	4.19706	7.16944	5.13116	5.98137	5.22362	6.32843	3.66347	5.03816	6.65516	6.99746	4.72452	4.92564	5.8704	6.95499	6.31411	5.76595	5.95652	6.38456	5.87087	5.11877	5.80907	5.79632	4.86331	5.35237	5.02758	3.25111	5.1288	4.85876	3.46631	6.46747	5.25116	5.28626	6.04166	6.76332	4.97347	5.82406	5.58788	6.39042	4.15264	4.79403	4.66519	6.92673	5.87953
TMEM130	4.88252	4.90326	5.12097	4.06719	5.89307	4.82345	4.48093	8.44399	6.72805	4.28329	4.20052	4.76733	4.50166	5.15925	4.08099	5.43838	4.29051	6.12246	4.51489	4.28613	4.37401	5.70352	7.59905	3.99616	6.35033	5.96224	4.82261	5.64663	4.21071	4.7038	5.65693	5.42878	4.51798	4.29742	5.95208	4.64478	7.03285	4.84717	5.08713	6.70076	5.59702	4.35135	4.1906	4.12358	4.74336	7.38191	4.41274	4.1498	4.67721
ABCC6P1	4.05667	3.33189	3.50748	3.61764	7.13827	6.11882	4.80232	3.30967	4.21601	4.46439	5.34273	4.01262	3.31428	4.02225	5.78605	6.1038	3.41669	4.70721	4.89503	4.73338	4.16523	4.76609	3.45133	3.66931	3.73176	3.79861	3.55901	4.36971	5.84247	6.56244	5.11258	3.42967	6.39946	4.31112	3.40056	3.78547	4.24611	4.56917	4.63793	4.45571	4.87931	5.87227	5.01205	3.44332	3.35249	6.86004	4.07461	7.6076	5.59114
HMCN1	6.21751	6.09602	5.58034	6.63321	7.07695	6.79567	4.54781	6.09527	6.1726	6.43485	5.38329	6.72062	4.02264	3.84556	6.65634	4.75851	4.09603	6.96699	4.39357	6.33516	6.99713	5.27845	4.63461	4.45897	7.37771	6.41374	4.04767	5.46285	6.83738	3.94322	7.33132	5.57146	4.18653	6.484	5.49595	5.24257	6.59398	6.4456	5.83833	6.01515	6.20681	3.96013	5.06431	4.7526	7.82885	5.1579	3.6623	4.49411	6.2009
SOX18	5.92891	5.09108	4.11219	4.17607	4.47909	5.19332	4.51202	4.47585	7.13791	5.90561	3.95549	6.11957	4.32276	3.98216	4.50728	4.29564	4.20973	5.65153	4.85466	4.65664	5.7365	6.33325	4.14043	3.88979	6.43788	4.75304	4.2849	5.39525	3.97415	3.96638	6.43926	6.94415	4.07357	4.66706	6.88199	4.90578	7.76142	6.77301	5.32933	6.10404	5.21617	4.30249	6.02416	4.39835	5.5588	5.8059	5.31007	4.50147	6.14017
SERPINA6	7.59134	4.56935	4.83665	8.77891	7.84502	6.06502	5.02624	4.30774	4.97891	8.51071	6.38988	7.07364	4.42657	5.19882	7.96311	8.04462	4.75051	7.43288	5.04624	5.26073	9.47644	4.9901	6.6628	6.19294	4.83577	6.25194	4.77916	6.20657	5.04371	8.94487	6.7037	7.89363	8.66674	7.3629	4.64396	7.31015	5.82191	8.26555	5.00085	6.83522	5.04581	4.52037	7.27231	4.63622	4.36272	6.36464	7.71347	5.31959	7.63809
C5orf27	4.01596	4.06948	4.27929	3.99243	5.94796	3.97969	4.05865	4.0035	4.15984	3.96271	5.31425	3.87147	3.87762	4.17428	3.97502	5.71383	4.0317	5.45497	4.17867	4.4654	4.8383	4.8138	3.99725	4.01534	4.3585	5.25452	3.92638	5.48733	4.36152	4.0816	4.51715	3.99535	6.56102	4.36071	4.10996	3.93927	7.28002	4.10517	4.09623	4.76898	5.52132	4.29822	3.87017	4.16798	4.36752	3.88437	4.10623	3.92421	4.00661
SCGB1D2	5.99181	3.76406	3.47973	3.6761	3.87995	4.87888	4.65764	3.32528	3.47388	6.56446	4.09379	5.85614	4.25663	4.28874	5.0865	3.42554	3.76675	4.02161	3.6363	3.45162	3.55097	3.54825	7.95697	3.52579	3.81028	4.53822	3.50125	5.30783	4.36114	4.28893	4.56397	4.07917	6.7221	4.79168	4.00045	7.30282	4.90164	4.73213	4.21964	4.19625	3.34239	3.37644	6.23826	3.84031	3.30936	4.04853	4.04191	5.24551	5.50337
HPGD	3.76651	3.79332	4.19564	8.6124	5.58505	6.13536	7.15885	4.36114	5.87783	4.02772	4.68725	5.45318	6.306	6.1643	4.5574	4.48597	3.85199	6.6318	3.97756	4.34932	5.9811	3.94221	6.44291	8.64057	4.73589	6.21283	6.30863	5.91078	4.64721	4.59525	7.50078	5.17084	5.2033	6.20867	4.39177	6.49399	4.26362	4.40421	4.78456	5.46382	8.63772	4.17527	3.89324	5.0514	4.49004	4.65947	6.68715	4.14282	3.85687
PTPN20B	3.31492	3.18366	3.09345	2.91029	3.075	3.10145	5.33587	3.46985	4.23546	4.90862	2.95591	3.13083	6.52442	4.05705	3.07765	4.87803	3.12199	3.18617	3.39891	3.08036	3.22655	4.20707	2.97432	2.96095	3.95179	5.53457	4.33055	4.26646	5.02345	5.01205	3.01589	3.07881	3.39507	5.25882	3.42634	4.58706	4.23835	2.97432	3.15591	4.58174	3.3753	3.18136	5.43838	3.53119	3.1525	3.15292	3.01518	4.29984	5.31517
FGF9	3.93396	3.82677	4.05767	4.98731	3.74736	3.80526	7.08604	3.72514	3.74463	3.59939	3.85563	3.65257	8.99102	4.53986	3.57832	3.76289	3.77893	3.62172	3.93351	3.924	4.9493	3.56135	3.75143	5.18108	3.53472	3.51189	3.78724	5.34657	3.87952	4.07562	3.60402	3.64753	3.6719	5.31188	3.37908	6.78024	3.86891	3.58831	3.6841	3.52381	4.92948	3.91182	3.59145	3.69334	3.88694	3.77805	5.70725	3.57481	3.67071
DEFB1	9.95625	9.78972	7.42357	7.78589	11.2557	7.9118	13.1162	8.67362	8.95638	9.43142	6.06754	6.95695	13.5155	12.7988	10.0772	10.9855	4.99873	8.44123	6.77209	7.87276	9.37629	6.18216	7.91934	4.88481	9.15044	7.99647	8.485	11.1638	8.38313	10.2825	8.53873	6.59854	10.0133	10.6316	7.38264	11.9829	8.97755	6.41374	11.071	10.511	10.1295	5.03404	10.031	6.79876	4.90226	9.66744	6.16787	6.55244	9.84929
EMCN	7.50394	5.13557	6.59632	6.61892	7.25845	8.80149	7.63675	5.47187	8.52645	8.83224	4.73382	8.67599	5.78025	6.01617	8.03232	6.19498	5.34021	8.74309	5.22699	7.68697	5.8609	7.70342	6.66504	6.20611	8.63919	7.30321	5.19903	9.39603	6.98065	4.93485	8.46711	8.65979	5.13716	8.94206	7.94253	8.96407	8.8109	8.74452	6.00403	8.15611	7.05346	5.27327	8.55466	5.64993	7.523	5.72333	6.39374	6.16533	7.78882
DMKN	7.46319	5.70657	4.83181	7.05205	7.10749	6.7509	7.44868	4.22935	3.99789	6.25434	8.86901	6.49287	7.30693	7.45112	6.20511	4.38144	5.00708	7.17463	4.70925	4.23057	7.54058	5.7985	5.10971	6.4329	5.21844	4.10075	4.44267	6.85405	4.74795	6.97866	6.02883	4.47929	8.54372	7.00775	4.10477	8.14745	6.538	5.28134	7.18639	6.51857	5.97723	4.05865	4.06613	4.32175	4.69687	7.36931	6.58257	5.76089	4.09664
ESRRG	4.79654	4.32997	4.43414	6.35921	6.16305	6.01541	6.40159	3.72675	4.06908	5.50109	3.74785	5.03728	9.07395	5.26769	6.51291	4.88352	3.79816	5.57406	3.77109	4.06867	6.3248	4.8132	5.48175	5.19353	4.06948	3.95043	3.78036	6.13938	4.0218	5.18977	4.69081	5.3755	5.4721	6.69217	4.16188	8.13598	5.22277	5.71479	3.82827	5.37352	4.85766	4.11483	6.80369	4.11749	3.58632	3.72376	5.91078	6.10728	5.30718
SHISA2	3.49698	5.14098	4.42007	5.04092	3.82979	4.55639	6.28573	3.64516	4.30633	3.2757	3.40974	3.72651	8.16636	3.80129	3.79955	3.72143	3.38845	3.86071	4.01756	3.55173	4.27993	3.96555	3.44725	4.3275	3.69426	3.49672	3.7078	5.43108	3.43725	4.91607	3.59168	3.6887	4.47563	4.28613	4.18897	6.03206	4.58686	3.62883	4.36971	4.06063	3.8821	3.4856	3.47633	5.37919	5.17172	3.96013	4.63127	3.38557	3.40201
FOSB	7.24662	6.22134	5.29767	6.34239	5.34657	5.56469	5.67423	6.37317	9.09186	11.5634	6.22984	9.85529	5.98188	9.27562	6.80673	6.98131	6.38053	7.43806	5.97141	6.06349	7.43523	6.71387	5.27207	5.6308	6.37317	8.98995	5.82312	9.79904	8.95526	5.57434	8.25094	9.9229	5.35725	6.51545	7.97885	9.57061	9.8142	8.03725	6.34728	7.95438	9.1156	5.94822	10.0911	5.62707	6.65604	5.64785	5.89038	5.55833	6.18934
GAS2	3.95424	3.42528	4.14452	5.35491	7.79217	5.11086	7.03619	3.7747	4.38224	4.38508	3.57239	4.49762	7.03348	4.49742	4.93653	7.0315	3.58679	4.47424	3.67495	4.46262	5.84848	3.47925	3.77738	4.13193	4.69983	4.73279	3.70758	5.18197	4.66729	4.77456	5.72858	3.92569	7.18321	4.89438	3.55349	5.0729	4.15663	4.09094	4.32875	3.91591	5.70422	3.67094	4.70823	4.12965	3.39052	5.27163	4.13682	4.60213	4.31855
IL17RB	6.80308	5.20127	5.42044	8.0612	7.3196	9.10131	7.84116	4.86518	5.47089	7.77371	4.99957	7.65673	4.63399	6.16736	8.91115	7.35257	4.56567	7.57413	4.57325	7.37349	8.18888	8.83927	7.98619	8.77804	6.67024	7.49084	7.54387	7.18284	8.71819	11.3408	7.41474	7.083	8.74059	8.92993	5.64713	7.97724	6.69431	8.42258	8.66511	7.87128	6.87626	4.59665	9.25566	4.62587	4.32216	6.24723	5.54014	11.2364	8.0488
LINC00924	4.50928	4.05966	6.94106	5.71241	4.24415	7.82413	6.53413	6.42112	5.19623	4.74902	5.19174	4.93843	4.58377	5.46263	4.48638	4.41173	4.68171	5.02345	6.29103	7.18284	5.2173	4.95378	5.07701	4.38692	6.4313	6.51661	4.07724	5.95802	4.11671	4.10517	4.56731	6.43104	4.06591	5.41748	3.73338	6.31866	8.0488	5.0418	6.93824	4.46643	7.39685	4.6174	4.06344	4.17448	4.14472	5.44269	3.92485	4.13173	4.27745
CTHRC1	7.75397	12.0291	10.796	10.0199	10.0356	8.98614	7.98251	11.2689	11.0051	7.59475	6.68833	8.36584	6.65194	4.39715	6.03991	8.27521	8.42462	8.98515	12.4537	8.89619	9.37913	8.06221	9.53817	4.22286	11.2496	9.95038	10.7393	8.72685	11.6658	6.0431	8.9679	7.71127	11.362	7.23589	9.95877	6.91993	10.5174	7.84652	10.7593	7.63138	10.04	8.03725	9.07822	10.5932	12.7369	10.4804	6.3041	5.48846	8.89346
TM4SF4	4.57888	4.52927	11.8861	6.81515	4.4155	4.33931	4.3555	4.19121	4.26419	4.26222	4.65622	4.25403	4.16503	4.40441	4.29583	4.62385	11.015	4.45352	4.57677	4.2268	5.58996	4.36252	4.37381	4.59768	4.53576	4.31834	11.088	4.93291	4.46726	4.16167	4.17324	4.38083	5.15474	4.57971	4.59564	4.17989	4.3786	4.41414	4.11138	4.54585	4.06427	4.59029	4.39676	4.25766	4.19018	4.66899	4.7148	4.46242	4.3137
CLEC5A	4.54642	5.51734	5.28134	4.26137	4.45752	4.26461	3.9114	4.38631	5.70308	5.56045	6.89743	5.14438	3.96229	6.79288	4.43839	5.95256	5.95728	5.58196	7.07257	5.32756	4.94842	4.83787	4.83308	5.66976	5.28534	7.58548	7.63015	4.52354	5.5029	5.06714	4.13799	5.62517	5.4092	4.04464	4.97437	4.22737	4.59642	4.72207	7.44868	5.51923	5.12308	4.88017	4.27089	5.32095	6.58624	5.19241	5.40322	4.39553	4.71895
APOBEC3B	4.48617	6.91418	7.16516	3.81094	5.81339	4.65408	6.90754	6.9925	5.41704	5.14438	6.06158	5.19926	5.30512	3.26674	5.68164	6.31596	6.67374	5.28782	6.40349	6.44615	4.30028	5.13758	7.44586	5.15255	5.1764	4.64355	7.11333	4.83392	5.40533	4.0315	4.54377	4.48257	5.458	4.82067	3.68197	4.57758	4.84882	4.92198	5.29098	4.73752	4.44635	7.5348	5.05789	7.78022	4.39277	6.37667	4.36433	5.88706	4.72145
DKK1	4.3369	8.28133	8.40192	4.59889	3.65115	3.98118	3.6353	3.66323	3.80314	5.89377	4.11812	4.98639	3.9532	3.77424	4.03288	3.75815	5.37691	4.0853	3.84091	4.3906	3.72699	3.91764	3.82633	3.56384	4.8605	3.80065	7.8265	4.27764	4.22109	3.43697	4.71832	4.3768	3.93095	3.98904	3.75522	6.27431	4.19932	5.0658	3.91483	4.67478	5.66671	3.83919	4.46418	3.64753	3.75055	3.99564	3.76382	5.21887	4.81468
SLC22A6	4.65174	4.70607	4.62259	4.61447	4.76628	6.60665	5.82613	4.72103	4.84759	6.75659	4.51776	5.65457	4.8495	5.3167	5.52893	4.47262	4.9601	4.65238	4.59665	5.77257	4.38242	4.81403	5.8564	4.82067	4.54477	4.74356	4.89696	6.37213	4.80588	5.31007	5.31891	6.74572	4.4177	8.11615	5.66909	5.45427	4.56418	8.87508	4.57037	4.80588	4.64376	4.83981	7.85905	4.59007	4.83028	4.52134	4.82004	5.67423	8.38061
CHIT1	5.21397	8.36328	4.39435	5.64663	6.03007	5.72882	5.37827	4.68846	4.72371	5.05357	4.69844	4.71292	4.62385	5.99254	4.00953	4.62966	4.65926	5.00107	4.81674	7.64036	5.01375	5.21284	4.76978	4.8134	6.21751	4.81214	6.04536	5.06342	7.35492	10.7015	5.70494	5.25901	6.08785	4.19685	5.61426	4.61655	6.31305	4.41788	4.86893	6.7087	5.00969	4.91859	4.91586	5.38011	4.60421	7.16275	4.81297	4.64416	6.53939
CYP8B1	4.53734	5.71592	4.9903	4.93015	7.65071	4.78276	4.22737	4.01872	4.54742	4.95052	4.57758	4.54212	3.86974	3.83377	4.71292	4.80983	4.45552	5.99881	5.14142	5.04752	5.48175	5.29814	6.66822	3.99979	4.15463	4.58174	4.36049	5.71241	5.2173	5.21823	4.35671	5.35213	6.14621	6.86433	3.80654	4.93054	5.48638	5.37641	5.94671	4.84066	4.91331	3.76023	5.39437	3.78146	3.90529	6.41569	4.14472	6.93093	5.42533
HGF	4.39735	6.23593	9.86521	5.98418	4.49105	5.02712	4.54948	7.74932	4.77834	4.70741	4.80983	4.87781	4.13048	4.1696	4.48278	4.49701	4.7123	4.62883	4.51552	5.27779	5.06881	4.22799	4.12637	4.45064	5.66622	5.29767	4.86873	4.74817	7.0014	4.0333	4.62198	6.05513	4.29171	4.56875	4.16085	5.37528	5.42186	4.58096	5.44995	4.65473	4.48421	10.0153	4.51158	5.61334	4.67416	5.13359	4.30511	4.74047	4.64272
SLC47A2	4.4408	4.8228	6.64331	4.89268	4.45453	5.3237	4.9648	4.31753	4.70779	4.92437	5.50898	4.60273	4.80298	6.23012	4.66814	5.03425	4.74605	4.58768	4.65113	4.9493	4.19992	4.88169	5.58309	5.13467	5.02215	5.00259	4.46343	6.14722	5.51016	9.71456	4.38832	4.74047	5.49523	6.78175	4.41924	6.25752	4.73192	4.81297	4.95444	4.5603	4.53478	4.59789	5.07549	4.36233	4.4654	5.01141	6.39865	4.69288	4.69919
ZNF114	3.37296	3.93906	3.69988	3.58658	7.62973	3.68294	3.97039	4.95052	4.39435	3.70293	7.81074	3.59168	4.34688	3.69605	3.55755	3.55053	3.57212	3.72651	3.82677	3.74645	3.4247	3.9466	3.75436	3.7041	4.89097	3.84534	6.41813	4.12823	3.45658	3.82282	4.71689	3.75281	7.11777	3.55777	3.5083	3.65808	4.14307	3.63023	3.88103	3.93285	4.54642	3.56159	3.61327	3.56384	4.05726	6.8025	3.66045	3.56358	3.55728
LY6H	4.03209	4.3371	4.45611	3.84838	3.68151	5.07935	4.50203	3.83705	5.1064	5.29882	3.61813	6.06527	3.98864	3.71918	3.82959	3.57212	4.23608	4.80087	4.6698	5.22989	6.1043	3.79955	4.3557	3.9941	7.87328	5.64118	4.21355	4.13236	3.59939	3.97523	5.72522	6.07428	4.02795	4.02554	5.8437	4.02511	8.94675	6.07181	4.7669	4.50322	4.02451	4.19932	4.26319	4.27529	6.88326	4.49887	3.94202	4.00066	4.23508
LOC440934	3.81136	5.64498	3.95466	5.81672	4.37095	3.66323	3.95444	4.13601	3.75635	3.98864	4.54477	3.50231	3.47041	3.71683	4.22577	3.82544	3.13719	4.28195	5.39158	3.96122	4.32175	2.92178	3.44944	7.93142	4.03613	3.72584	6.55501	3.54544	3.71826	3.99812	3.76698	3.89172	7.3633	3.48453	3.48586	4.50466	3.35307	3.34805	6.01879	3.5093	3.49119	4.16004	3.70223	4.33077	6.1487	4.9946	5.06119	4.63562	3.21338
SLC26A9	4.58906	4.80298	4.13919	4.34321	4.27192	5.12574	4.52599	4.25151	4.99116	5.8224	4.61826	5.10728	4.16146	4.4284	6.36302	4.61508	4.50992	4.22392	4.45335	6.24903	4.48195	4.80588	6.45903	4.20569	4.18592	5.3291	5.87685	4.73527	8.24909	4.3371	4.72312	4.60666	5.28248	4.84673	5.08062	5.84565	4.28893	5.51669	6.02141	4.8698	4.29984	4.21861	7.43052	4.50748	4.3689	4.48881	4.69328	7.8932	6.99746
NRN1	6.46447	6.77727	7.66621	5.22035	9.01064	6.9955	6.04166	7.38829	7.59218	5.96772	4.48901	6.46581	5.32552	4.57344	5.01396	4.28348	4.35693	7.36668	7.85329	6.09577	6.39119	7.43094	4.59889	4.78916	6.85496	5.98686	8.89787	7.19214	8.54013	4.3873	6.15507	6.79658	6.503	5.78652	5.76664	6.27458	6.26966	6.55326	8.7947	6.01953	5.59303	5.54462	5.64568	5.45825	8.92066	8.36965	5.68088	7.69146	5.27483
HNF4G	4.28329	3.56039	3.96658	4.65113	4.36613	5.5294	4.16523	3.73131	3.97039	5.29591	5.23618	5.0641	3.47312	3.614	5.55855	4.8815	5.74539	5.29858	3.91463	4.35693	4.91816	4.79343	3.65257	3.28587	4.15346	4.60541	4.5312	3.95992	5.66645	4.09257	5.05293	5.10793	6.07107	5.44682	3.68551	3.75257	3.68294	5.19151	4.11832	4.06846	3.46794	7.35825	5.9098	3.99012	3.61929	4.41294	4.14124	5.86583	5.54776
SLC6A13	9.28676	4.88191	5.06474	5.25616	9.79904	10.829	9.77866	5.36245	6.30278	10.9024	7.88727	9.31262	5.66101	6.937	9.39461	7.2283	5.45777	10.8631	5.20283	10.0112	5.88249	8.45782	8.99202	8.41232	7.47992	8.65191	6.78631	9.67269	9.03227	9.96295	10.1736	7.61738	9.43142	10.4833	8.26494	8.50445	10.0748	10.1031	6.60468	9.55526	7.33474	5.20236	9.92085	7.21428	4.83745	9.41417	7.90586	8.36453	9.40024
TTK	3.6899	7.01533	5.9928	4.01451	5.22945	4.8109	4.01853	5.40533	4.8916	4.59828	5.81672	4.63232	4.54029	3.53272	5.2149	5.17239	5.40599	4.37721	5.43449	4.8765	4.17625	5.0182	6.48263	3.78845	4.62178	4.19663	6.53939	4.17304	5.71048	3.86111	4.12803	3.35707	3.90191	3.85795	3.38845	3.33636	3.92356	3.88293	5.70584	4.09237	4.49064	6.75983	3.7458	6.27538	6.07205	5.49546	3.89303	4.50086	4.09521
STAP1	3.67865	4.10741	3.77962	3.77219	3.66586	4.23014	8.17113	5.26141	3.7713	3.57529	4.13512	3.87485	10.4375	4.33221	3.58188	5.3867	4.16188	3.91808	3.67746	4.47155	3.63121	4.13421	3.57188	3.66114	4.00661	3.7458	5.07616	4.96284	4.40826	3.72928	3.66586	3.7354	3.76197	4.5753	3.88822	7.0261	3.87524	3.63236	4.02058	3.66909	4.85056	3.88802	3.72376	4.95555	3.86593	3.62576	3.83129	4.00868	4.08872
BEX5	9.00388	7.65071	6.77148	6.95966	8.15554	6.62609	9.55207	5.08861	5.45754	7.85517	4.28893	7.56577	9.03526	7.85713	6.598	7.81128	4.5145	8.46773	5.88658	6.7019	6.0078	6.14621	5.50969	7.8528	7.3629	8.14119	4.78728	8.5344	6.79721	7.14304	8.45989	7.71347	7.05171	7.64433	6.7102	8.48153	7.15781	8.58149	5.92769	7.87929	5.74687	3.91849	7.46984	5.39135	3.842	4.55454	5.50639	5.08861	6.00854
SGIP1	6.47302	3.73495	5.48916	6.3046	4.79632	5.70494	4.06741	4.63314	5.1271	7.88279	5.15519	6.38589	3.77178	4.17345	4.8478	4.25849	4.7526	6.25486	4.69328	4.59808	6.6273	4.21882	3.92872	3.4294	6.15077	5.89626	3.50152	5.89015	3.84359	4.27253	6.17706	5.29615	3.68106	4.86224	3.96678	7.34658	6.00875	4.2689	5.09553	4.60895	6.16968	3.75838	4.11929	4.47014	5.71479	4.24293	3.7322	3.6887	5.26098
TAC1	3.235	3.0438	3.35942	2.99205	6.29313	3.22212	3.03478	3.01103	3.25344	3.1866	3.17468	3.40338	3.08141	4.55137	2.99951	3.05111	3.0438	3.12017	3.02782	3.31205	3.05829	3.14643	3.521	3.31178	2.93657	3.05886	3.06395	4.56418	4.63314	3.10959	2.95591	3.47949	2.92277	3.35851	2.93748	3.55728	3.80724	3.10241	3.2564	3.21448	3.39864	3.15926	3.09592	3.13083	3.056	3.23568	3.16214	3.04495	2.91029
PLA2G2A	4.9946	5.6036	4.83308	13.7424	6.7923	4.95074	5.15902	7.00542	5.13826	4.88352	5.55132	6.54516	5.25594	4.96261	4.8305	6.28294	5.47595	4.6654	5.98212	5.13072	10.6821	5.16518	4.86725	5.18469	4.889	6.15948	4.98465	4.91331	10.9519	5.33652	5.01354	5.16364	5.32393	6.19799	4.84628	4.99395	6.14896	4.84628	5.51899	4.89976	8.41686	6.30711	5.04928	4.8383	5.91371	6.30517	4.92564	5.15769	5.07332
ATP6V1G3	4.32503	4.64355	3.87189	4.01893	3.92528	4.15821	9.7622	4.09993	4.1218	3.79397	4.29843	3.81841	11.04	4.21286	3.84226	3.85753	4.05487	3.92462	4.11992	4.46123	3.77265	3.83485	4.26401	4.01136	3.94365	3.87736	4.06508	6.71114	4.45169	3.98529	3.98697	3.91372	4.28835	5.46126	4.05406	7.19031	4.06467	3.82852	3.87544	4.17345	6.02416	4.07519	4.09172	3.91979	4.22896	3.81754	4.02836	4.09623	3.8224
CYP4X1	5.43361	3.47442	4.10222	4.50647	4.66729	5.59466	4.5753	3.98739	5.86021	5.96844	4.56955	6.31515	3.35132	3.49802	5.33542	4.32276	3.8615	5.94822	3.62119	4.0481	5.43561	4.41314	4.51836	3.58783	6.27512	4.7148	3.55531	6.14597	3.79017	3.92638	5.66286	5.81975	3.50905	6.17232	3.86869	6.59993	6.1434	5.72566	5.12574	4.89593	6.27718	3.74011	4.8538	3.98592	4.78083	4.12378	3.69218	3.63	4.91221
ANXA13	6.09428	4.2925	5.27954	8.3639	4.85812	4.76796	4.73966	4.59213	4.18529	9.46486	5.24172	6.72415	4.25303	5.25093	8.50519	6.00156	8.29749	6.02165	4.71995	5.84075	8.78215	5.78888	6.12063	6.57106	4.3067	5.94332	4.33651	5.6761	6.41569	7.16028	4.93054	5.31692	9.10448	6.71917	6.89903	4.8592	5.64262	6.72837	5.42697	5.17016	3.97083	6.04685	7.46157	4.79632	5.64971	6.69628	6.98458	4.98858	7.03521
SLIT2	5.10619	8.25094	6.00156	8.74533	5.20283	5.6728	8.9225	6.73072	6.71203	5.42968	4.67824	6.09043	9.23064	4.06783	4.97736	5.09354	4.67352	5.38444	5.14812	5.82074	5.53193	5.28966	4.89656	4.39756	5.93716	5.56936	4.94627	6.54051	5.15384	5.07571	5.37176	5.52505	6.56651	6.31622	5.15519	5.2006	6.85818	5.12687	5.90955	4.62693	8.1423	4.38671	4.1502	5.54916	7.3773	5.31891	4.08119	5.39016	4.58076
SLC5A10	8.56776	5.20911	5.42416	5.24172	7.55294	9.1896	8.05535	4.97955	5.17218	9.09512	7.1301	8.46711	5.10553	5.43361	9.73738	5.97163	5.26518	8.21756	5.16408	8.44052	5.03532	7.8212	6.53826	4.98639	5.67375	7.21721	6.18909	8.25766	9.33748	6.72563	5.65363	8.53297	9.41814	8.75683	8.32666	5.88125	5.61793	9.01535	5.66429	8.19829	4.95378	5.25025	9.45359	5.14617	5.04581	7.30795	5.43905	7.90889	9.97765
TWIST1	4.16658	8.308	4.07482	4.69646	4.3728	4.29703	3.74556	5.42044	6.20017	4.62528	4.125	4.50787	3.43442	3.77446	4.48617	4.1118	5.63265	4.34216	4.63149	5.2151	4.78814	4.46017	3.60503	3.39834	4.91947	5.06209	3.83172	3.99638	4.89676	3.50878	4.06181	4.50827	3.7442	3.68639	4.50026	3.66135	5.55156	4.3541	4.78336	4.05786	4.76169	4.535	3.77219	5.34608	9.06233	4.09418	4.9482	3.36101	3.62244
ENPP3	8.52717	4.42555	4.08748	9.74976	10.1246	9.83401	8.28616	6.49483	10.2532	7.64777	9.87327	10.1811	4.1248	5.06733	10.7245	9.00964	7.79026	9.97349	8.28299	9.47789	8.55466	10.4102	10.3158	7.00614	10.5297	9.26824	7.27231	9.52454	9.70726	8.19113	9.90401	8.83131	9.77674	10.0264	9.89371	4.77165	8.5473	9.75507	7.87328	9.69971	7.66666	5.19241	8.80659	7.72536	4.11056	8.98136	5.2033	8.57571	9.35974
SNAI2	6.80965	7.8688	7.91124	7.8621	6.65693	7.80642	6.44369	7.23806	8.89875	7.0024	9.89593	7.04761	4.92406	3.89767	6.15236	4.97891	5.55719	7.12303	8.76335	6.39599	7.81355	6.45817	5.6733	7.31583	7.79123	7.01917	5.42487	7.49084	6.17338	3.71826	7.5817	7.03722	4.95421	7.55846	6.95208	8.32542	7.7628	6.78081	6.4238	5.85269	7.30656	5.46619	5.00107	6.27929	9.99552	6.99451	9.59448	5.27185	6.02713
RP1-142L7.8	4.11302	3.48212	4.1066	4.98553	4.69307	4.46017	3.77178	6.72238	7.04531	5.33404	6.3488	4.33949	4.1036	3.64635	4.8432	5.93449	4.27469	4.82239	3.809	3.39167	5.17059	6.98776	3.59513	3.46739	3.93758	4.25663	3.74645	4.10119	4.12416	3.39864	5.67809	4.05426	3.6473	3.45303	4.38935	3.63964	5.60169	4.00762	4.75475	4.14371	5.33381	4.43516	4.15243	4.53539	6.03819	4.66557	3.535	3.5679	3.80267
RP6-99M1.2	3.57581	4.79403	5.3475	5.32866	4.57244	3.86071	6.70785	5.04092	6.05464	4.60853	4.25151	4.45711	8.36717	8.26555	3.89725	4.31873	3.85453	3.87672	4.80319	4.23917	4.00267	3.85753	3.72419	4.14452	4.37381	5.75903	5.53124	4.79168	3.99936	4.18169	5.88829	4.6893	4.29485	3.83022	3.57832	6.49903	4.90477	3.84726	5.21754	4.01735	4.8538	4.77205	4.89614	4.99873	7.17428	3.60889	7.36858	3.96313	3.82872
NEXN	3.89172	7.36406	6.92058	5.40781	4.22973	7.07025	6.32708	6.97736	5.66101	5.08713	4.97891	5.37133	7.7874	5.46619	4.66479	5.41143	4.59463	6.51234	5.33767	6.9823	5.9765	6.2801	4.76898	6.17651	6.56446	5.76424	5.97334	7.58833	5.19174	5.54132	6.14769	7.33549	4.20507	5.98982	5.26249	7.15781	7.03084	5.09817	7.04935	5.75828	8.75442	6.04042	4.90081	5.80306	6.88953	5.05517	6.49933	7.84891	4.3906
EP300-AS1	4.66663	4.3375	4.69687	4.7239	4.33221	5.04477	4.74336	4.4408	4.00679	6.12827	4.20372	4.98837	5.13873	3.30812	6.95761	4.61064	4.24974	5.6036	5.01462	4.22454	7.09286	4.00106	5.03772	3.65257	4.59808	5.3076	3.79484	4.32563	3.73018	3.59295	4.50626	6.1434	4.81719	4.87312	3.70758	4.10497	4.18372	5.41143	4.2314	4.7127	4.08628	3.99033	6.50357	4.9439	3.53987	4.29327	4.2489	4.68995	5.86422
AOX1	5.42139	5.30488	5.41958	5.82687	6.28268	8.25827	7.01887	5.20553	5.05832	8.21456	8.08916	6.17678	4.60751	4.69983	8.55913	6.07057	4.59441	8.05695	4.88794	6.8405	6.56244	6.52442	6.42543	7.32343	6.70929	7.18107	4.63622	7.66488	5.33698	6.36188	6.98361	8.49595	4.88543	8.95344	8.09623	7.6835	7.72083	6.54683	5.23345	8.57715	6.70664	4.7671	9.01627	4.95964	5.74851	6.42112	4.80427	7.17051	8.74059
ENPP5	6.96222	4.63665	4.61549	7.23048	7.36013	7.18359	6.63899	3.86529	6.04239	6.95113	3.3274	5.90656	6.16994	5.28447	6.94321	5.32733	3.55276	6.37748	3.27537	5.86228	6.5966	5.26073	6.69863	7.8426	5.67049	7.09187	5.17131	5.60495	6.45436	7.54427	5.97117	5.51037	7.65891	7.47391	3.86552	6.7145	5.55928	6.80999	5.56185	5.85926	4.45511	3.11686	6.0948	3.56641	4.012	5.57708	6.70842	6.838	6.94702
SLC12A8	4.50485	10.635	6.54929	5.13202	5.63009	4.42409	4.8865	6.74544	5.25363	4.24573	4.65745	4.5266	5.89871	5.84122	4.07978	5.32276	5.45593	4.98062	5.81388	6.50013	5.85903	5.01569	8.32542	4.93696	4.49985	5.12119	5.77906	4.48421	5.61523	6.3587	4.31092	4.28974	6.94165	4.32462	4.19706	5.50381	4.60915	4.10321	6.6321	4.35693	5.10861	6.39973	4.13131	7.24299	5.90149	5.55301	5.84825	4.88395	4.04587
GLYAT	7.66108	4.31652	4.28532	4.45107	7.24972	6.81032	5.66954	4.01955	6.04189	7.72183	5.30176	6.37616	4.15122	5.50805	7.36965	6.88016	4.29722	6.65844	4.24195	6.80277	4.27689	5.79184	7.37076	7.72355	5.38191	6.07798	5.1791	6.99776	6.66822	8.93277	6.18909	6.04042	7.49251	8.09036	4.56671	6.74515	5.954	7.01984	5.91545	6.47078	5.13093	4.12535	7.53777	4.36135	3.96431	6.24391	7.87128	7.23985	7.56098
RAB25	4.39215	6.66622	4.87003	6.11402	4.18228	4.1922	7.46714	3.82349	3.97991	3.9466	4.00579	3.94075	7.81355	4.3689	3.73452	3.86006	4.28071	3.88123	4.48541	3.89067	3.75999	5.07181	4.33671	3.98236	3.91591	3.94723	4.04149	5.68259	4.29192	3.86194	3.98425	3.82852	4.02815	5.61911	4.6052	8.31987	4.41945	4.07194	4.04443	3.7926	7.93047	4.00001	3.94365	4.19303	4.17039	4.0816	4.31311	4.12279	3.93016
SLC51A	3.92441	4.1851	3.90592	6.60322	5.63499	4.76876	4.45792	3.8195	3.76608	5.76784	4.44863	5.14164	5.15101	4.23773	4.72432	5.34843	4.12261	7.06048	4.09299	5.46432	8.36328	6.08838	5.82895	4.05885	3.99494	3.79284	4.53696	6.28703	4.89202	4.10397	5.51084	6.47625	6.91829	6.72444	4.84465	4.2268	4.06141	5.29659	4.60421	4.48638	4.14043	3.92421	6.47163	3.757	4.27783	5.34773	4.13601	6.64564	7.2402
HIST1H2BC	5.02194	4.01615	7.66321	4.34871	5.62235	6.30331	4.90883	6.61089	3.91163	7.36438	5.80375	5.40231	4.04853	4.27709	4.9601	6.60832	4.19523	4.99783	6.24698	4.01302	5.1288	5.06297	4.98575	7.29389	6.42942	8.02208	8.38767	5.14185	6.18011	3.93673	4.19141	5.19174	5.88612	4.8109	4.55054	4.70925	5.39796	5.28022	5.4624	4.7239	4.1851	7.72083	6.32505	4.05525	5.66502	5.20619	5.22807	7.56448	7.05918
TMEM45A	8.54234	10.2741	11.5988	11.301	9.23529	7.25113	6.92093	12.1079	10.4465	7.53081	7.10177	7.68835	4.73902	8.44816	7.48197	10.4527	10.4711	8.69607	9.9338	8.92993	12.0131	8.17834	8.51071	7.60586	9.33475	11.015	9.81021	8.19113	9.82425	6.3279	7.2559	7.33474	10.2769	7.12627	8.70319	6.39229	8.59118	9.09712	11.3754	7.22408	7.47143	8.05913	8.93565	9.08258	10.6897	10.431	6.41981	7.08604	9.02025
LINC00942	4.21477	4.17304	5.15588	4.01115	4.01872	3.84178	4.1118	3.98697	3.93095	4.13621	4.08768	3.93866	3.908	4.16402	3.98425	5.39135	4.18775	4.01596	3.96555	3.96678	4.01814	4.02142	8.66433	4.09257	3.85497	4.29545	7.0068	3.92546	4.14307	3.94117	4.18208	4.17304	5.27436	3.86891	4.08807	3.69403	4.00699	4.0033	6.56446	3.85626	4.13819	4.18429	3.97268	4.55215	4.07319	4.14739	3.83594	4.05907	4.03551
MUC20	4.52599	5.29148	4.86476	7.74477	6.80552	6.37861	10.1586	5.5155	5.16387	7.37692	5.14185	5.91819	10.0796	7.00577	7.997	6.7373	4.48299	7.18141	5.2051	6.94763	8.19293	7.16448	6.95145	4.82943	5.79087	5.84028	4.84003	7.18497	7.25333	7.66843	8.42328	5.45018	4.3359	7.31129	7.43483	8.46243	6.82858	7.49007	6.31515	7.87174	6.23569	5.25639	7.14582	5.57896	4.81234	4.74968	7.10073	5.46501	6.43235
SLC44A4	4.81985	5.42901	5.19656	7.36133	5.29326	6.10858	5.31167	4.09788	4.56671	4.99632	4.13542	5.17977	4.2286	4.46123	4.59057	4.00288	4.42007	6.34026	4.29424	4.83224	6.01466	5.08973	4.60085	4.20608	4.93142	4.333	4.14472	5.92067	5.64523	7.7836	4.63006	4.50105	4.59066	5.98188	5.1137	7.75168	4.93054	5.07442	6.41319	4.89055	5.27555	4.22577	5.80806	4.19542	4.10641	6.55161	4.15761	8.25766	4.55947
ZBED2	3.87806	5.85418	3.69774	3.58558	3.91591	4.12358	3.62095	5.41257	3.69218	3.66795	4.08447	4.36592	3.61232	3.78036	3.52988	4.44306	3.97589	3.54825	3.97268	6.19191	3.80199	5.0129	3.757	3.86761	3.72813	3.41781	5.71501	3.97185	5.88923	3.95466	3.58291	3.31428	3.54395	3.63236	3.80853	3.83043	4.12618	3.5101	7.25113	4.0855	3.83151	6.61581	3.69403	7.29274	3.9095	3.87189	3.71497	7.49875	4.83456
MZB1	4.74584	7.97001	5.3076	5.41958	4.79425	5.77804	5.27933	10.353	4.97912	4.69142	5.21844	5.51899	4.83434	6.86402	4.58521	9.84369	4.8484	4.6113	6.9342	7.79647	4.65845	6.72238	4.79321	4.81153	4.62405	4.57992	7.89221	5.23431	6.34482	5.10686	4.8538	5.31581	5.42742	4.79902	5.25862	4.70065	5.45732	4.72061	6.37369	5.1922	6.02292	7.83461	5.05726	8.13144	5.03357	4.82715	5.31845	5.72908	5.07852
TCEAL2	3.76023	5.04862	3.76787	3.37616	3.40597	3.59822	5.43473	3.41752	3.42043	4.28715	3.59269	3.52202	4.07194	3.32675	3.7485	3.62342	3.59467	3.69468	3.45522	3.79332	3.3613	3.76608	3.71683	6.40403	3.63506	3.4	3.70873	6.12219	3.66931	3.59822	3.82197	3.67936	3.6222	4.36771	3.52579	6.00403	3.92615	3.59772	3.72304	3.51351	6.1316	3.56916	3.57382	3.25572	3.8083	3.22581	4.33139	3.59418	3.38588
LOC340340	3.98885	3.769	4.61278	5.47395	8.37417	3.62859	3.49775	4.81783	4.2519	3.59746	5.34632	3.53449	3.61013	3.41145	3.4602	5.15407	5.47115	5.63709	4.04649	3.94533	4.27132	3.67048	3.57357	3.70009	3.45162	3.75402	5.97895	3.7984	4.31917	4.31978	3.52453	3.6649	5.01883	3.55531	3.5335	3.5963	3.72976	3.41579	4.92665	3.75372	4.29327	7.02641	3.52479	4.7503	3.67213	6.57162	3.63211	3.6841	3.54235
LOC100505874	3.7136	4.46604	4.39815	4.12055	5.28335	4.98815	5.6997	4.2715	3.85367	6.65105	6.85405	4.65113	6.06109	3.92996	5.00708	4.46707	3.76242	5.14164	5.85319	4.83072	6.25462	3.75885	6.52111	5.17197	5.61242	5.77044	5.0729	3.8145	3.87973	6.95727	3.74235	5.2241	3.79127	6.51377	3.67841	6.79354	5.73439	3.80221	4.08669	7.02015	5.00506	4.50026	5.50781	6.05006	4.34029	5.44383	6.32319	3.70545	3.63121
MACC1	5.5036	4.28592	4.89245	6.88016	7.43094	6.22677	4.9607	4.22896	6.44108	6.6436	3.78416	5.88464	5.82736	5.88028	6.79935	4.66834	6.30331	6.81215	3.7731	4.91416	6.20736	5.93008	5.70188	4.63542	5.03511	5.68259	5.17503	6.19875	4.38935	7.94767	4.53779	5.26929	3.90086	6.98552	4.18011	7.28914	5.42581	5.92381	6.94045	6.31435	4.82239	7.24374	7.02641	4.27671	3.62432	7.18533	4.24771	5.64428	6.1457
APOB	4.09379	4.06404	3.98055	8.04134	6.51999	5.1822	4.52784	3.81709	5.02278	4.7642	5.17392	4.13601	4.05705	4.12576	4.44366	6.71174	4.09828	4.66415	4.65303	6.0095	8.0995	4.19421	4.10641	3.96678	4.55353	4.05012	4.14163	4.25054	4.42212	4.19706	5.70725	3.78834	4.03209	4.44446	3.76152	3.84643	4.30994	4.20073	5.58599	3.9937	4.01262	5.00729	4.27727	3.92105	3.75186	6.76126	4.20909	4.40703	4.68353
PANK1	7.55419	5.78193	5.52455	5.20576	7.64263	7.80455	7.95485	4.45611	6.54023	8.77205	6.15077	6.95798	8.09623	7.961	7.71901	5.95304	4.00147	7.12414	5.48803	7.38302	4.92726	4.97692	6.9955	8.62351	6.18163	6.49287	5.83093	6.47329	7.41512	6.03991	6.77148	6.22701	7.44202	8.94587	5.97265	7.83511	5.73534	7.43806	5.10396	5.96912	4.79425	5.53457	7.961	4.83787	5.58858	6.39374	7.89174	7.30434	7.82748
CTD-2292M16.8	6.58596	6.32265	6.28916	6.11681	5.95279	6.84113	5.79608	5.89307	5.80881	6.59307	6.69683	6.78261	6.14769	4.74377	6.82858	6.71297	5.33232	7.12487	5.45255	7.05648	6.95898	6.59993	6.54516	6.42247	6.54541	6.91039	6.22908	6.74424	5.0725	5.67049	7.01825	6.0345	5.71287	6.11352	6.23243	6.47078	6.30652	6.00205	5.63855	5.67115	5.18751	5.27577	6.30791	6.01144	5.51084	5.73722	4.95466	5.21397	6.71917
HAPLN1	5.5439	5.59726	4.48541	7.45275	7.71388	5.53363	4.32396	5.43748	6.70516	4.91177	7.00614	6.65781	4.69558	3.87652	6.03228	4.79321	4.14797	5.7946	4.29114	5.37849	7.03854	4.93054	4.70947	3.6011	6.34187	5.00969	4.35811	4.64925	4.94714	3.80875	7.22044	4.34848	5.90731	4.93821	3.92188	3.70126	4.84383	4.53043	5.47964	5.62494	4.97001	4.54377	4.65494	5.97265	6.13966	7.161	3.65522	4.1987	6.85749
TSIX	4.15183	3.978	3.80766	6.27564	3.6956	3.67817	3.59986	3.62412	3.78258	4.8316	6.8665	5.60242	3.49802	3.75793	3.66421	3.60889	3.56487	3.69856	3.7041	3.62692	3.60377	3.61739	3.57581	4.72661	3.77018	5.47258	5.42901	3.65115	5.68538	4.67478	3.66633	4.75216	5.37352	4.67456	3.32276	5.35866	3.56159	5.27069	3.6363	3.5452	3.71826	5.8564	3.64112	5.88272	3.57455	3.57041	5.01779	3.68482	3.67472
GZMA	6.92474	9.58029	7.3919	7.03485	6.26761	8.03777	7.06489	8.27521	8.57352	7.08099	7.99594	9.71627	5.25452	6.2622	8.62042	8.19884	7.34242	7.16798	7.01699	9.41134	6.00403	9.20351	5.28313	6.39704	7.34697	6.9925	8.96601	8.02912	9.14715	5.43176	7.45745	5.47439	6.13536	6.13637	7.44586	6.74938	8.19005	6.0802	8.17358	8.61678	7.12828	9.86136	6.42486	10.7715	5.7595	6.23188	8.35301	10.0288	8.86464
ERICH5	3.45215	3.61835	3.55728	5.14725	4.21642	5.92502	4.32377	3.27205	3.67771	5.40092	3.35014	5.63151	3.27143	3.98446	6.27144	5.29258	3.56039	5.88393	3.27404	3.67332	4.3879	4.67456	6.43954	5.15057	4.35351	4.8765	3.49566	4.73752	4.28553	3.65973	4.91926	4.28911	7.00473	3.94385	4.32396	3.94425	3.89684	5.31981	3.54976	5.02906	4.57201	3.34028	4.94098	3.42842	3.33337	3.35467	5.14416	4.39317	3.58532
PITX2	3.12063	3.01929	4.15861	4.67981	3.1533	3.70943	3.26342	3.24022	3.05426	2.87879	4.58055	3.07019	3.20221	3.07934	2.91132	3.3785	3.49883	3.02655	3.51457	2.79632	3.1354	3.03228	3.343	6.82729	3.05829	3.29411	3.26414	3.05053	3.96493	3.0354	3.62642	3.03102	2.91029	3.04752	3.25206	3.18487	3.01929	2.99951	3.59489	3.17544	2.99287	7.20356	3.02782	3.23392	7.42541	4.61847	3.25809	4.42758	3.24602
PIPOX	5.6378	4.90102	4.83537	4.60541	5.57753	9.23529	7.55801	4.715	5.54939	6.94165	5.79583	5.03687	4.21782	4.15366	5.45497	5.63357	5.36888	6.29313	6.69804	9.24482	4.69162	5.54677	6.19443	4.57472	5.53243	4.59747	5.09062	5.48662	6.41891	4.81297	5.25901	4.64882	5.89724	7.64814	4.28974	6.08539	5.45708	4.74502	5.68284	4.67204	5.2082	4.44366	6.02367	4.83392	4.71875	5.63128	4.05071	5.29591	5.72786
G6PC	3.71337	3.72493	3.65138	4.01534	3.85963	7.7628	6.08394	3.77649	3.79484	6.44133	3.92105	4.35251	3.69514	3.80569	3.93016	3.73384	3.80043	4.84608	3.91182	5.12462	3.90612	4.02665	3.89536	3.75723	3.70456	3.75907	4.16188	4.64272	4.04126	3.9363	4.07957	4.24934	3.81511	7.19069	3.62479	5.43151	3.91849	4.45792	3.74785	3.90021	3.81928	3.5963	4.91541	3.66206	3.46081	3.91182	3.61158	4.56631	4.79343
UBE2QL1	5.6464	4.3377	4.43516	4.63542	6.17808	5.62825	8.38895	5.68967	5.34956	5.39178	4.86454	5.03404	9.24721	4.11541	5.15146	4.81783	4.27409	7.2402	4.07194	6.6178	4.7471	5.06252	4.80298	4.03939	4.44529	4.35631	4.78769	5.99205	5.78095	4.15143	6.62984	8.02208	4.96329	6.56132	4.26544	6.49877	4.7619	5.4624	4.77652	4.9961	5.28022	4.5568	5.81388	4.57491	4.67046	5.96989	3.92996	3.89516	5.73674
ZBTB16	7.31883	5.14351	7.05205	5.68284	5.52177	5.25093	6.9777	4.94349	6.77086	6.97705	6.91512	7.49486	4.95266	6.22365	7.44361	7.55505	7.33621	10.2264	6.1847	8.76011	8.28744	9.53067	8.44399	6.83614	8.80914	7.49606	5.69662	9.35974	7.97153	6.52689	9.86336	10.4711	8.39094	8.85575	9.58829	9.96713	6.53467	8.37417	6.7406	10.1906	7.82167	5.82947	8.24493	5.86183	6.89015	5.98137	8.81929	7.69985	7.27745
SMIM24	6.90561	5.36569	5.30672	6.25038	9.79541	10.1686	10.9386	4.80446	5.74179	9.30148	5.91002	8.97378	10.1612	7.64263	10.1008	7.21721	7.37888	7.88927	5.97581	8.95344	7.67365	9.09296	7.84408	5.11989	7.06993	7.56009	5.96251	9.91231	8.49595	9.41814	9.32031	8.14065	7.70731	9.46771	8.21279	8.64817	8.32049	10.4012	7.99244	8.97378	5.59137	6.26812	9.07293	5.1139	5.0641	8.60926	5.754	9.23404	9.51555
GRIN2A	4.12299	4.10822	4.19141	6.36923	7.49042	5.8432	4.62158	4.34237	5.37397	4.29882	7.13893	4.81234	4.23651	4.08726	3.95179	3.8761	4.00412	5.39591	8.05361	4.17241	7.08365	4.12261	4.52577	4.65517	6.43871	6.19319	4.51613	5.17571	4.03857	4.52295	4.73065	4.37298	7.67494	4.06063	4.19162	4.18816	5.91723	4.3728	4.16167	5.7324	5.79372	3.88979	4.02124	4.00772	3.89979	5.38011	4.48678	4.05606	4.02019
LINC00626	5.08819	3.86761	3.64801	4.24554	4.08365	3.88758	3.99812	3.95488	4.00453	4.58906	4.63232	4.34668	3.87672	4.09931	4.06322	3.69751	3.73338	4.06888	3.54925	4.65195	4.46503	3.85133	4.02161	4.16286	3.90508	4.1169	3.82914	3.88543	4.14797	3.77627	4.01034	4.0855	3.76877	3.82872	4.26665	3.57581	3.86006	3.71592	3.81642	3.81469	4.24611	4.28993	3.75793	3.97714	4.77895	4.41314	3.93176	3.521	3.87588
LOXL1	5.30869	10.7317	9.41004	7.57453	6.43235	7.00743	7.33242	8.12695	7.2566	5.69297	4.68995	6.9823	6.87249	5.70018	4.35193	4.95987	6.54051	6.36247	7.69638	7.37692	7.4278	7.0261	6.8232	9.75148	7.73133	7.6106	9.00487	8.19941	7.08674	7.51813	6.46252	8.13416	5.58907	6.91228	7.65337	7.46829	8.52236	6.32398	9.26944	7.38567	10.4772	7.26585	4.74295	8.64748	9.65549	7.64937	6.65486	6.49258	6.60861
MICU3	5.03857	2.98375	4.74254	5.80758	6.3528	5.74492	5.53566	3.75119	5.06515	5.91746	4.37881	6.78473	7.28219	4.63994	4.94497	5.92333	5.68635	6.47302	3.84941	5.54583	5.27577	5.07227	3.73869	6.65313	6.20788	4.58138	3.53963	5.63855	4.68846	5.23773	7.08707	6.15284	3.27111	6.51798	3.39021	6.82631	6.09826	5.78118	4.95137	6.38403	6.54683	5.81909	4.12555	4.65682	4.17947	4.93843	6.83646	4.2089	5.34112
KNG1	3.88313	3.74396	3.82349	3.70147	3.73291	4.34133	4.31333	3.68802	4.01262	3.72168	3.7442	3.63892	5.96023	5.14547	3.63845	3.7442	3.62951	3.6516	3.67712	3.77738	4.76062	3.54595	3.64396	3.81403	3.49993	3.52554	3.70921	6.67251	3.58708	3.79191	3.66252	4.00913	5.71839	7.10608	3.90866	9.84738	3.73797	3.66677	3.57909	3.82587	3.62172	3.81202	3.72236	3.59916	3.60836	3.72881	4.61612	3.62412	3.66323
TOX2	5.89478	7.59818	4.12098	4.92544	4.87847	5.35002	4.36992	5.89137	5.40599	6.18673	4.93991	6.91639	3.84815	3.71497	6.18113	5.09754	4.6284	6.67251	5.15541	6.95079	4.48822	6.96447	4.25808	3.82372	5.92044	4.62587	5.55058	5.80259	6.27171	3.62366	6.69045	7.08236	4.0341	6.19117	6.40594	4.64681	6.35845	6.62093	5.99636	6.59307	4.44468	5.54108	5.96	8.00955	5.99156	4.71127	4.45023	8.09502	6.65987
C12orf56	4.04953	5.18665	3.85709	5.95113	3.80546	4.04443	5.33208	3.85429	5.4664	3.96394	4.65926	3.76452	4.2715	4.0903	3.85563	6.09752	3.88437	3.7485	4.64272	5.26954	3.61281	5.17932	6.65105	5.25158	5.14547	3.95569	3.97226	4.24112	5.19644	5.56795	3.89303	4.50667	5.56068	4.00538	3.7078	4.50166	5.59092	3.74305	4.8305	3.9028	4.70885	7.24628	3.86283	3.79284	4.10937	3.82544	6.26295	3.99958	3.73495
AIM2	4.401	7.71852	9.34943	5.10373	5.11989	5.32844	5.16053	8.64293	5.59585	4.6265	6.47736	5.57665	4.4402	4.69708	4.79841	7.88727	5.53654	5.38421	6.27278	7.0447	5.42068	7.3594	5.98266	4.57699	5.24391	4.99265	8.71901	5.0418	6.42007	4.24112	4.45086	5.11877	5.06668	4.53779	5.28855	4.62237	5.74082	4.32938	6.18648	5.67163	5.42374	6.00628	4.30711	8.77547	5.53654	4.76297	4.57449	7.54671	6.15868
ANGPT2	6.79174	5.39066	6.2306	7.93549	8.27402	7.13962	6.04335	8.1401	9.17281	8.67523	7.99647	8.76335	5.17437	3.953	8.11554	6.43788	5.33632	7.76996	6.20511	6.71772	8.53078	7.86781	6.58874	5.63499	9.1896	9.28072	7.26005	6.86525	7.02674	4.20668	9.0312	7.42503	6.63414	7.5076	9.61402	5.89061	8.72362	8.49802	6.97672	8.02689	5.58623	6.05513	7.56274	6.83034	7.91879	7.73244	4.61655	5.83045	8.37998
DLGAP5	3.23429	7.54587	6.13135	4.0622	5.50403	4.65947	3.82872	4.87107	5.23478	4.22067	4.87825	4.86476	4.12637	3.42528	4.62797	4.6752	4.78378	4.55391	5.5799	5.40274	3.97543	4.49887	5.65275	3.60817	4.90556	3.82587	6.77086	4.12239	5.24391	3.37997	4.06678	3.62119	3.91224	3.69702	3.93609	3.14987	4.23794	3.54341	5.35168	4.05705	3.70664	6.27016	3.82959	6.51999	6.87783	5.37374	4.14202	4.39357	4.02161
PRSS8	5.74733	6.06133	4.54256	6.72805	7.20916	6.63616	8.13953	4.36493	4.42596	6.76535	6.97537	5.71193	8.66828	4.57592	6.79413	4.56525	6.52717	6.61666	4.14677	6.35737	7.09324	5.37528	5.63199	6.59826	6.04636	6.88892	5.3889	6.88736	7.15027	6.77666	4.58644	7.6359	3.9283	7.83814	5.78528	8.13303	6.33703	5.97015	7.22441	6.9373	5.01205	5.44143	7.99342	4.1924	4.03266	8.18477	5.29052	8.28248	8.86038
ITK	4.82859	7.11199	5.49968	5.56351	4.83937	6.07897	4.85405	7.083	6.66339	5.52088	6.45903	7.37157	3.69654	4.38282	5.85567	6.67549	5.42044	6.10706	5.55397	6.76419	4.79507	7.03552	4.24075	4.45571	5.50337	5.42374	7.23083	6.27877	6.59484	4.48134	5.92915	5.14331	5.04818	4.65745	4.67844	5.58951	6.55925	5.03575	6.77453	6.24984	6.24823	7.605	5.3207	8.80828	5.03511	4.62716	5.92841	7.38454	6.36548
RBM20	4.5274	3.39864	3.7185	4.07704	4.61697	5.03879	4.2093	3.86111	5.69492	4.17078	3.94365	5.15989	3.78416	6.06373	3.87762	4.27908	3.7704	4.93798	3.32954	5.25944	4.38651	4.79321	3.4361	6.598	4.99654	4.00392	4.1222	4.90943	3.84792	6.26707	4.20094	4.88293	3.60862	3.94342	4.10222	4.52315	4.82492	4.25132	4.0417	5.00046	4.10378	3.36777	3.70055	4.72474	3.83462	4.02752	7.22761	3.94159	3.95822
SLC2A10	6.81246	7.19316	7.5076	6.78568	8.2849	6.5747	5.39956	8.28366	6.57442	5.81243	5.02082	6.19245	5.51646	5.62494	5.28945	8.76809	4.7311	7.03981	5.31845	4.87781	8.43058	5.55527	7.81128	8.44123	6.84266	5.43062	4.26319	6.23469	5.23502	7.49999	6.15131	6.11106	4.12397	6.35364	5.73002	6.72952	7.10442	5.84051	6.78809	5.25882	7.52755	7.85663	5.04329	4.53331	8.82675	7.4706	8.31925	3.78303	5.36616
PDE1A	4.17686	4.17947	9.28072	4.66207	4.29843	5.00571	5.51386	5.14098	5.49831	4.80232	5.3673	5.22922	6.9464	8.24252	4.26792	4.83328	4.52927	5.12506	4.28693	4.97347	4.42067	4.11992	4.11606	7.63361	5.49715	4.96738	3.89958	6.09428	4.21738	3.55404	6.11255	5.16974	3.64947	5.90222	3.96805	8.13898	5.96725	4.70655	4.82426	4.19442	5.02041	7.30868	4.1435	4.20329	4.16188	4.38812	8.60708	3.60836	4.25663
HAO2	6.69985	4.34008	4.15163	4.46302	5.4899	7.47474	6.1796	4.26281	5.22546	7.47309	4.28448	6.3663	4.41648	4.54436	6.81337	5.26432	4.2312	5.78215	4.16381	4.75304	4.26627	4.63728	4.47155	4.83006	4.54171	5.49223	4.33239	6.17832	5.37691	6.14818	5.83474	5.43316	6.09353	7.9178	4.50203	6.55612	4.65408	7.41266	4.51552	5.64831	4.26035	4.40119	7.27927	4.45064	4.30396	4.4329	5.0308	4.8912	7.07221
NR2E1	8.32299	4.00805	3.75793	6.57052	4.74026	4.07645	3.87254	3.84857	4.28954	3.89216	3.89236	5.64785	3.86324	3.99638	4.99978	3.78589	4.03695	4.6263	3.9763	4.06762	6.7923	4.21822	4.55541	7.72802	3.93176	4.36493	3.9524	4.20909	3.76066	3.92188	4.09338	3.99222	3.93653	4.1502	4.3877	3.958	4.10558	4.38612	3.8211	4.00001	5.16387	4.04483	4.0089	3.92546	3.94824	3.99594	6.77086	3.93906	4.15423
PDE10A	5.15146	3.86636	4.69963	4.31693	6.82411	4.43435	4.55215	5.79274	5.60908	4.33117	7.25515	4.73382	3.82872	4.21131	3.99854	6.11007	5.23502	5.83019	6.27303	4.62777	4.90062	5.75661	4.0033	3.61564	4.77372	3.94095	5.83474	5.47754	5.40712	3.6363	6.5772	4.51428	6.93946	4.60044	4.58886	4.79675	5.73772	4.3477	5.05357	4.82383	5.71911	3.68802	3.97652	6.29875	5.00992	5.01672	4.20991	3.74011	4.07745
PKIA	5.55032	6.10934	6.58286	7.73833	5.62169	4.22067	9.00487	5.45039	5.68164	4.05468	4.15143	4.52477	10.2453	4.4229	4.1791	5.75022	4.83621	5.80978	5.48494	5.70471	7.36252	5.09288	4.01283	4.67478	4.5712	3.86656	4.91991	5.8788	5.18288	5.24237	4.37539	4.05507	4.03836	5.23345	3.83855	6.19799	4.51136	3.91808	5.08755	4.2765	5.7054	4.36114	3.83217	5.3673	6.20949	5.61659	6.76965	5.24576	4.74689
ASPA	7.76328	4.36951	4.18248	7.7307	8.47383	8.37159	6.99649	6.02567	7.38528	9.12878	7.56361	9.09186	4.10119	4.20329	9.99765	6.58509	4.91991	7.5716	7.91879	7.36133	7.70431	7.73156	7.68097	7.51277	7.65337	7.63015	6.06527	8.22697	8.41883	8.17943	7.26512	6.58057	8.55243	8.72532	6.88672	7.54226	7.30247	9.15044	7.19143	8.43986	6.75384	6.74149	8.63617	5.3934	4.05885	7.86487	7.3192	8.94771	8.3857
RP11-981G7.6	4.3275	3.05053	3.83855	4.09215	5.15496	4.29447	3.50336	3.59269	3.66092	6.62984	3.79172	5.91274	3.81642	3.41233	6.66935	4.24094	3.33458	5.08343	3.29822	3.78458	4.27069	4.2264	3.57261	4.11832	4.30711	4.01432	3.97523	4.82471	3.80356	3.99789	5.59585	4.57971	3.49383	4.9691	3.59045	3.96412	4.08929	5.39483	3.98055	5.04818	3.49277	3.52075	5.32209	3.62269	3.62095	3.57455	3.58267	4.99783	5.40599
FAM151A	4.38045	4.24094	4.68274	4.2715	4.47484	5.19046	4.71026	4.15621	4.64781	4.74968	4.73549	4.29306	4.32728	4.28775	5.05033	4.73488	4.4286	4.70823	4.13048	4.707	4.34321	4.50466	4.41134	4.51895	4.56751	4.44124	5.19484	6.01215	5.37574	4.24335	4.79675	4.12555	4.90862	8.04618	5.30738	4.65343	4.23245	5.5546	6.15845	4.73045	4.28934	4.04381	4.80278	4.11851	4.41274	4.01014	4.26544	8.45921	5.32209
ZIC2	3.45608	4.81884	5.42722	3.387	3.99033	3.38992	3.21742	4.40301	3.42605	3.61232	7.64562	3.43528	3.51658	3.47156	3.58882	3.79745	5.80424	3.3695	6.79385	3.57239	3.51246	3.4994	6.15845	3.57606	3.86847	3.57681	5.69056	3.52153	3.65376	3.53653	3.57065	3.20966	5.54085	3.46303	3.3637	3.37997	3.32862	3.34951	3.79106	3.29214	3.25535	5.34912	3.42914	5.37943	4.6543	4.94119	3.51505	3.42802	3.55149
ZNF204P	5.64618	3.72469	4.05323	6.94763	4.28993	6.11427	5.5211	4.30795	4.11219	6.1366	4.22661	6.38137	5.38444	5.06008	7.22761	6.46862	4.30951	6.62008	3.63404	4.3244	6.26812	5.33792	3.6094	5.3105	4.51222	4.60421	3.59822	6.59452	4.60853	7.02739	6.23297	4.62341	3.39108	6.15456	4.09192	7.23448	5.70746	6.09577	4.08243	6.64703	4.90862	3.54595	3.92704	4.15285	3.45856	3.62763	4.56418	4.49474	6.34214
EOMES	5.63174	8.45709	5.93376	5.13446	4.90164	6.42593	5.33115	7.75305	6.85281	5.73986	7.11571	8.03617	4.48114	5.22637	7.25515	6.79935	6.20973	6.19041	6.15103	9.49226	4.95598	8.64293	4.61994	5.22875	5.82312	5.39273	7.28289	6.72035	8.80914	5.3425	5.93278	5.0514	5.15496	5.25429	7.11536	5.3121	6.70341	5.22567	7.71475	7.45593	5.8432	8.53297	5.37397	10.0657	5.27954	5.21973	5.45062	9.20925	7.83078
SMCO3	6.60555	4.34299	4.45253	4.46849	3.64256	4.13601	4.54843	3.55607	3.40395	3.58009	3.58906	3.61813	4.86893	7.06048	3.59986	3.65473	3.71567	3.75815	3.76877	5.17461	3.64014	3.39282	3.85133	9.02834	3.83964	4.19564	5.49808	4.54356	5.42258	4.05323	3.68435	4.08406	3.44636	4.31491	4.21334	4.36292	3.84292	3.55029	4.28368	3.48425	3.82872	3.4213	3.5932	3.46794	3.91098	4.89416	8.60926	7.84652	3.56666
RERG	6.64245	5.28557	6.11629	7.28665	8.2063	6.29264	7.76465	4.71086	7.10676	6.98165	4.74968	7.20065	6.66044	6.29906	7.76142	7.44398	4.67963	8.87338	4.63542	4.94246	7.28476	6.21544	8.4346	7.12794	8.04134	7.6007	6.3322	8.48571	4.35811	7.87834	8.88141	6.74694	8.03342	6.90531	7.59004	7.54427	8.34375	6.8025	5.72406	8.25885	6.46802	4.01915	8.29381	4.45957	5.67212	7.88131	7.12695	6.59073	7.58419
FXYD4	4.48541	5.12924	4.61634	4.24094	4.43983	4.39377	7.45275	4.04993	4.3244	4.26362	4.09684	4.05606	7.47309	4.62609	4.39337	4.11992	4.37482	4.07258	4.30533	4.25745	4.16362	4.30593	4.58966	4.51634	4.20073	4.10477	4.06888	8.19884	3.908	4.51472	4.38025	4.42574	4.39398	7.77742	5.15452	12.0615	4.05586	4.21093	4.22027	4.36613	5.36114	4.15346	4.43022	3.90259	4.25209	4.21738	4.37014	4.46082	4.02305
KRT20	3.10052	3.29346	3.39538	3.56568	3.37701	3.24536	3.42418	3.25206	3.29822	3.25411	3.34533	3.33189	3.35276	3.236	3.33247	3.20553	3.37091	3.27143	3.13177	3.53548	3.36163	3.25206	3.32339	12.0131	3.37325	3.30719	6.64676	3.35879	3.44695	3.32801	3.29918	3.24704	3.61209	3.24159	3.40172	3.31701	3.13129	3.28806	3.31057	3.20181	3.56718	3.38845	3.30875	3.36657	3.68482	7.60114	3.4161	3.25473	3.13676
SLC44A5	3.40455	3.44527	3.49566	5.49595	3.41955	3.50203	3.5106	5.61334	3.70804	6.07722	3.55149	3.59045	5.44361	3.73918	3.48927	4.25323	5.04051	5.31581	3.48535	3.51404	3.64232	3.54209	6.85593	5.77539	3.56435	5.72333	4.84297	3.75305	4.51715	4.32175	3.70388	3.60503	5.24196	3.70664	3.65257	4.91437	3.50388	3.5143	5.15813	6.30149	3.75678	6.7724	3.5192	3.43697	3.62692	3.5689	4.21942	3.47682	3.43442
PCSK1N	5.33976	5.90149	5.34518	4.80484	6.57579	5.83403	5.74733	4.83266	5.05557	7.55965	4.91541	7.28914	5.62213	7.68793	8.76809	6.25408	5.7245	5.57503	7.00844	6.12982	5.27257	4.77229	8.78874	5.45267	5.10771	5.1755	4.78456	6.58677	6.11377	8.72685	6.27982	8.3291	4.934	7.4795	6.30094	7.80272	7.18925	6.66995	8.31371	7.86641	8.14339	6.48849	5.24846	4.97847	5.11411	7.5328	8.38642	8.77456	7.72581
IGF2BP3	3.9645	5.6831	4.28553	3.81797	5.35237	3.76336	3.65736	4.45352	3.8613	3.63	5.16825	3.68919	5.88612	3.82566	3.60817	5.51923	5.63381	3.70171	4.57158	4.01115	4.32094	3.70897	6.26632	3.597	3.91396	3.76946	6.3663	3.58316	4.74377	3.72767	3.7373	3.62975	6.23721	3.49434	3.69727	3.54802	3.66421	3.63167	5.14703	3.85069	4.10222	7.88871	3.58558	5.44197	4.19953	5.35586	3.60719	3.68686	3.76518
RBM24	5.18265	6.0244	4.03003	3.97062	3.71196	5.96325	4.23427	3.86006	4.54927	3.71497	3.73315	4.79985	3.40856	4.47585	7.43885	6.39758	4.36433	5.84098	3.76452	4.45629	4.00679	4.97214	3.66748	4.39676	4.21822	3.64161	3.71592	4.82448	4.52216	5.45318	4.81719	4.91459	3.65783	4.74066	4.29424	4.42921	4.48961	5.48565	4.29545	5.50429	6.81187	3.88437	6.13429	3.63506	5.08583	3.81007	9.10892	3.54209	5.69249
IGHM	5.84028	8.05535	6.76844	6.95594	4.92665	7.62703	6.93946	10.9386	5.92381	5.14746	6.38825	7.29757	5.53145	6.69045	5.05965	10.1031	5.89307	5.94332	8.19529	8.06327	5.40138	7.39306	5.45987	5.5792	5.53821	5.35467	9.8572	7.33438	6.78114	5.96251	6.12219	6.60112	6.93023	6.32398	6.84723	6.35389	7.93703	5.73196	8.40509	6.50412	6.93573	7.22373	6.0688	9.02834	5.47283	5.75259	7.00912	7.09052	6.36791
FBXL21	4.77144	3.49802	3.47899	3.58734	5.32664	3.86238	3.73655	4.07917	4.31613	6.14466	4.09993	5.17218	3.67071	3.99178	7.08137	4.84505	3.6094	5.02322	4.66958	3.58082	3.6593	3.65327	5.72474	5.49246	4.84993	5.87613	3.83441	5.50454	3.60695	5.80211	4.51654	4.68867	5.78866	3.74829	4.91757	4.67782	4.69833	6.33808	3.97502	6.46969	3.61542	3.95951	5.09971	3.50958	3.67888	3.93565	4.30834	3.6461	6.3797
OSR2	6.21855	5.10352	3.75999	3.7731	3.54366	4.24274	3.94702	3.86507	4.01814	3.83661	3.6649	4.88313	3.84272	3.84155	3.62172	4.07113	3.58954	5.63009	3.64778	4.50363	3.31178	3.70664	4.64438	3.3942	4.73774	3.30243	3.68459	3.84272	4.34688	4.54887	4.53023	3.97373	3.61739	4.33281	3.65376	5.91494	4.65152	3.64112	4.23814	3.66045	7.01178	3.96142	3.59513	3.57631	6.64104	3.79745	4.00024	4.94267	3.74077
CFH	5.31029	7.88434	7.65891	8.38375	8.52857	8.48353	7.13217	8.66902	7.71716	6.47541	8.80914	6.79783	4.55905	5.39412	5.19376	8.11492	7.51404	6.937	10.7015	9.3333	9.92085	5.71738	5.80637	4.36071	8.54509	8.31492	6.59043	7.61906	7.18675	4.62756	7.3746	7.86487	8.75442	6.3322	7.75539	6.96604	8.31624	6.57944	7.34475	6.54683	8.45709	9.28437	5.33743	7.6973	8.90322	7.76773	6.66071	4.97152	6.10634
FOXD1	6.0296	8.84013	5.97064	5.44569	6.69863	5.05205	7.53814	5.36569	5.48542	4.55215	6.26735	4.8605	4.06259	4.04629	4.27631	5.2534	4.43474	4.84083	4.48278	4.82067	4.86873	4.47707	6.76933	7.25333	4.99675	4.91563	7.36668	5.58243	4.48318	4.24835	4.85098	5.5162	6.27225	4.94412	4.44207	5.82947	6.83614	4.53437	6.00156	4.25766	5.36796	7.04178	4.39435	6.42805	6.3386	4.73234	7.59818	4.21477	5.9643
PPAP2C	4.75051	5.8749	7.78541	6.69744	4.23527	4.62883	4.43819	5.53009	4.34341	4.32156	5.0485	5.58102	4.4937	4.45192	4.36454	5.56328	8.60708	4.3679	7.42821	4.84251	7.0024	4.43414	5.1148	5.08604	6.34645	5.05247	7.71475	6.10706	5.38329	6.65664	4.51116	4.60771	6.29658	5.30361	4.63293	5.53894	5.85442	5.82711	7.18463	5.55602	6.18163	7.60718	7.4706	6.54316	4.62034	6.70991	4.46521	5.3443	6.97216
GZMK	6.80787	10.5204	7.69547	6.51515	6.83677	8.24433	7.14481	9.8877	8.83496	6.53047	8.65265	9.79541	4.92746	6.63527	8.50367	8.68594	7.6835	7.32604	7.42313	9.87542	5.3925	9.6157	5.12553	6.88984	7.16275	6.70785	9.27068	8.56776	9.41681	6.09428	7.61401	5.86183	6.6318	6.36247	7.8402	7.18746	8.13539	6.33599	8.79631	9.09186	7.2219	9.59289	6.83988	11.48	5.98364	6.35553	7.43169	10.7051	9.14715
FABP3	7.39267	7.27013	5.57526	6.5047	8.39543	8.10668	8.33988	4.48338	5.56867	7.65718	5.44086	6.33679	7.86976	8.49802	6.62034	5.51132	4.7894	7.55043	5.3482	7.09052	5.15057	6.58425	6.02241	9.68621	7.90237	7.42658	6.83954	7.10248	7.91934	6.95339	6.99417	6.24391	4.74459	8.26312	6.86004	7.54387	6.42593	5.67924	5.12391	6.68509	6.4535	4.75894	9.16284	5.72786	5.70516	6.58791	8.10349	4.70507	7.8818
RELN	4.93991	4.66578	5.19198	4.67329	6.67637	5.21263	5.6278	4.60955	6.41026	4.60771	4.59256	4.27311	5.40465	8.19592	4.7556	4.85034	5.05402	5.0658	4.80405	4.79654	6.98327	4.92564	6.26992	5.26477	4.89526	5.32417	5.66405	5.23077	5.51316	10.3473	4.69369	4.61487	8.46243	5.20488	4.16167	6.56882	4.80383	4.52234	4.78876	4.9004	5.01483	4.92286	4.81254	4.73172	5.57943	6.85686	4.79861	4.76062	4.60999
RP11-38P22.2	4.84694	3.88103	6.63152	5.83161	6.84484	6.63991	4.62716	6.42994	6.65136	6.92186	5.86348	6.05638	3.4954	3.59443	6.45846	5.43151	3.99594	6.70755	6.64935	6.79475	6.16787	6.56738	4.06741	3.57065	7.30759	5.86678	5.47305	5.60888	6.14645	3.89704	6.07277	5.8776	4.56134	4.9903	4.64416	3.58507	6.08446	5.85495	5.40853	6.13207	4.81592	4.87695	5.00282	6.31596	5.62235	5.54175	3.34446	4.38123	5.66976
COL23A1	9.69283	5.21002	5.37738	10.1368	8.85306	9.18645	8.15319	5.16847	8.40707	10.3501	5.03162	9.58829	4.56315	5.14119	9.9338	7.36054	5.39115	9.23772	7.11777	8.54952	10.8631	8.88566	11.5546	6.39485	8.93377	9.29301	7.20065	9.95877	8.14687	6.16155	9.19422	9.4592	9.00388	9.08038	9.45228	5.26098	9.2606	9.82425	8.82358	10.0469	8.69447	4.61064	9.4212	5.68444	4.74481	9.59448	5.83544	7.99396	9.73893
UNC5D	3.9966	4.05546	3.53753	3.50413	3.69654	4.96196	7.75123	3.66021	3.53325	4.08929	3.70196	5.29703	6.36385	3.83746	3.42528	3.73562	3.98157	4.77895	3.51708	3.60232	3.89621	4.99542	3.55123	4.58827	3.75656	3.66537	3.5963	4.648	3.90716	6.04805	3.8355	3.65425	3.5442	5.06838	3.47012	5.06163	3.80702	4.21683	3.66633	4.18938	3.87189	3.53016	3.53679	3.72651	3.86304	3.87017	3.51998	3.62622	3.52859
SERPINE1	7.4015	9.65079	8.24252	8.20878	6.97407	6.75028	6.03774	9.1177	10.8631	7.99647	11.1815	8.21517	5.30488	5.98784	6.21027	8.80231	10.4772	9.88362	10.628	7.59905	9.46486	7.11955	6.15634	4.77795	9.54753	10.0446	10.6681	9.74976	8.65666	5.29615	10.8673	9.78972	7.5447	7.74613	10.0025	9.92522	9.75686	8.11384	9.47206	10.7921	8.69531	10.7593	7.70776	11.1305	9.61402	9.33994	6.90407	5.51016	7.05137
RP11-138I17.1	3.24194	3.4718	3.24881	3.20371	3.42774	3.27795	3.3519	7.47633	3.34181	3.15634	3.52153	3.52153	3.49144	3.50388	3.75566	3.49063	7.06146	3.5072	3.62738	3.31524	3.43867	3.40856	3.37119	3.53835	3.64232	3.41843	3.49383	3.52334	3.23536	3.74305	3.75586	3.34387	3.58882	3.48051	3.23846	3.35823	3.31146	3.521	3.5101	3.44751	3.44751	3.22397	3.47949	3.35707	3.31492	3.45424	3.43053	3.1853	3.58188
DHRS2	4.5533	4.88041	4.31938	4.44757	4.45294	4.33445	8.4156	4.49025	4.3756	4.70589	4.44941	4.3875	11.071	4.74943	4.4237	4.36771	4.73668	4.18878	4.7336	4.18897	4.26362	4.59604	4.41511	7.09767	4.59789	4.51406	4.60213	4.51836	4.43331	4.93737	4.44124	4.3549	5.62707	5.33698	4.10955	4.86643	4.34891	4.30374	4.59152	4.41865	11.9107	4.56895	4.58076	4.50147	4.76609	4.81131	4.91245	4.5097	4.50466
RNF183	5.2232	4.95882	4.39534	8.12924	6.91729	7.27568	6.09092	5.34773	6.00231	6.59603	4.54906	4.87355	4.46282	4.16979	4.48803	5.51991	4.46686	8.32779	7.07793	6.42247	7.22156	9.45359	6.90344	4.50728	6.0876	5.41053	5.48589	7.48197	6.70048	4.94204	4.51592	6.46551	7.27196	6.45903	4.79466	4.89032	5.55855	4.70003	7.30434	4.86662	4.1218	4.21316	7.04178	4.58055	4.78563	7.0922	4.2396	6.5837	6.53158
C19orf80	4.36613	4.72124	4.48278	4.60873	5.57824	5.87613	5.35654	4.571	4.32018	3.95716	6.71828	4.19992	4.67541	4.96758	4.34627	6.15634	4.58477	4.50808	5.42673	8.88929	9.94	4.1274	4.39796	4.25766	4.36192	5.11347	5.02428	4.25808	4.82492	4.23388	4.46205	4.3857	9.51092	4.69814	5.28134	4.48541	4.31674	4.27864	6.80552	4.27689	4.10538	4.7731	4.40281	4.44366	4.35429	9.33864	4.47503	4.08365	4.38467
LOC102723845	7.50356	3.8789	3.91568	4.9901	7.20494	7.40375	6.07504	3.80923	6.43345	7.13487	6.38613	6.90951	3.9283	3.94159	6.41347	5.93985	3.95631	6.88263	5.7009	5.58012	5.61636	6.24111	7.35787	5.64568	6.23397	6.07107	4.49536	6.44888	5.85833	8.85395	6.47984	5.64855	4.28573	7.91625	5.31981	5.255	6.63588	7.05346	4.89908	6.2306	4.46562	4.00848	7.37313	4.15721	3.64971	6.83865	5.08041	7.28808	7.37575
PLEKHH2	5.75544	3.89536	5.37619	4.7604	4.1987	4.7292	4.31112	4.01834	5.53315	5.74106	4.12055	6.34933	5.09396	7.07257	6.95375	5.82074	4.21191	5.42438	3.84922	4.93164	4.75173	5.47139	5.11127	4.62923	6.4113	6.03576	4.8871	5.7054	5.5928	8.80742	4.32789	5.16321	3.66957	5.89499	4.97001	7.26831	5.52847	6.00403	5.04371	6.68017	5.25001	3.76174	6.43208	4.43393	4.82196	4.19912	5.2867	5.13557	4.86071
MAP3K7CL	6.63036	6.507	6.34026	7.29236	9.06042	8.26074	7.08502	8.30674	8.69996	6.3157	6.37641	7.29169	6.15385	5.2769	5.50086	7.91074	6.68158	8.03617	5.52599	6.79783	6.36517	7.05313	6.84359	8.22936	8.82598	8.75352	7.55378	8.21701	6.2485	5.17392	7.50518	5.60122	8.51622	5.87783	7.44948	5.41213	8.38895	5.44839	7.06317	6.91543	7.3219	7.72355	5.93766	6.24795	6.06678	7.15533	7.65381	7.36738	6.09627
C9orf66	5.96276	4.15641	3.66396	3.95929	4.93205	7.01566	5.53267	3.88293	4.56153	7.44478	4.84525	6.67133	4.51755	3.79038	5.88612	6.31969	3.71802	5.00327	4.46686	4.87847	4.23388	4.52477	4.90624	5.17822	4.91266	4.64313	4.28251	5.80449	6.29208	4.37401	5.45618	4.52234	5.08085	6.4113	4.52927	4.52017	4.77103	5.81885	4.79824	4.68274	3.98864	3.75233	6.8926	4.02329	3.73268	4.5574	4.77652	7.33242	6.6758
PLA2G7	6.41813	8.57866	5.24301	7.44281	6.92989	7.32114	6.30012	5.4434	5.88923	6.35765	7.13756	6.02811	5.33091	5.58907	5.34608	5.51411	5.3475	7.0447	6.75174	7.92594	6.7866	7.28808	4.51387	4.73446	7.45191	5.46803	7.1276	5.83161	8.39543	7.34918	6.68802	5.57847	6.87308	4.44468	5.94895	4.42716	7.33819	4.51736	6.34482	6.95966	5.44523	6.02543	5.75709	7.45071	7.98148	7.37076	5.78581	4.54192	6.57776
PLA2G4A	4.04894	5.47849	5.44947	4.94204	5.10174	5.54413	6.55048	6.34566	6.25539	4.97524	6.92641	5.7245	6.70722	3.97393	4.10281	5.58309	5.41979	5.81766	5.91152	5.81975	5.42186	4.13778	4.67395	4.7125	5.74778	6.37589	6.36818	5.58972	4.71209	4.38467	5.39956	5.50179	4.23245	5.59491	4.12903	7.92038	6.58901	4.54927	5.64286	4.5646	7.5496	4.55215	4.87191	6.22832	5.52505	6.09194	4.05155	6.81421	5.36431
KIF11	3.59489	5.89651	7.26434	3.87973	5.79777	5.24777	3.89346	5.73048	5.42764	5.01483	5.94695	5.61981	3.84963	3.39891	5.2453	5.51037	5.55551	4.91692	6.41813	4.95729	4.18011	4.34133	5.704	4.1451	5.33	4.95444	7.28914	4.39574	5.44039	3.40568	4.47833	4.19891	4.97305	4.59544	3.64705	4.06081	4.71813	4.4455	5.9595	4.70174	4.4219	6.86373	4.73836	7.30478	5.33115	6.0078	4.50992	5.55009	4.61487
ITGBL1	4.14491	3.68362	4.98226	6.89935	4.53437	5.82023	4.77732	5.32978	4.13361	4.51531	4.38224	5.15124	4.39553	3.59746	3.77062	4.07299	4.01178	4.88063	4.3689	5.34453	5.30627	4.04567	4.21457	3.59024	5.74897	5.18578	3.6363	5.57102	4.37319	3.74761	6.76419	5.51692	3.82043	4.71832	5.18022	5.06142	5.76377	4.71854	5.91995	4.95137	7.53242	4.80693	3.95737	3.80724	5.34773	4.73424	6.31919	3.83919	4.32037
C1orf210	5.61773	4.3545	4.06888	5.28805	4.83266	5.95427	5.7507	4.07461	4.31172	6.26031	4.23751	5.42627	5.14503	4.14328	5.57217	4.04104	3.84922	4.6756	3.88378	4.21151	5.29415	4.06304	5.77979	4.05907	3.96825	4.77564	4.28176	5.29636	4.67143	5.34183	3.88123	4.46223	5.86899	6.67549	4.60915	6.91195	4.44863	5.8982	4.65494	4.25424	4.02599	3.80546	7.12197	4.04296	3.84726	4.2595	4.06569	6.63097	6.66533
LINC00113	3.66092	3.7041	3.67865	3.74829	3.93887	8.25702	6.94009	3.45	3.56718	6.47625	3.8477	3.87318	5.27391	4.46302	4.7313	3.51378	3.7622	5.46926	3.78036	4.46282	3.69988	3.80943	6.92579	3.69727	3.63355	3.96825	3.75414	4.10158	4.58906	4.78276	4.49165	3.72304	3.72559	5.16321	4.05648	5.3489	3.9468	3.71032	3.52554	3.78525	3.69514	3.51816	5.69757	3.66396	3.59961	3.85408	3.66655	3.86173	4.18917
THBS2	5.82848	10.8249	10.2608	9.80085	8.36255	10.1295	9.08144	10.0112	7.98519	7.7401	9.31786	8.20577	7.4049	7.85663	5.7552	7.25888	8.17298	7.59218	9.32693	10.5731	8.83224	8.78624	8.26437	6.04734	10.6974	9.76972	6.43788	9.51701	9.319	10.5404	9.33748	9.10341	6.9107	7.75397	10.0513	7.89824	10.2187	7.98945	10.5797	8.35362	11.8103	8.83665	5.81195	7.01306	10.4743	8.62649	6.51122	5.32023	6.48153
ZNF826P	7.75349	4.79363	4.1662	5.69708	4.03391	4.05135	3.80679	5.04456	5.91695	5.93693	4.05197	5.52847	3.59024	3.74374	6.02811	7.4049	6.69773	6.23371	6.68305	4.18208	4.78979	4.73924	4.6044	5.65434	5.10419	4.8278	4.70528	5.32163	6.24748	3.57932	6.07229	4.81783	6.52332	6.76815	4.11199	6.05694	4.4392	6.47382	6.07649	6.59427	5.06752	6.04734	6.13991	5.01842	3.84534	5.05422	5.07355	5.63829	6.02618
NR2F1	7.46279	7.69232	9.01448	6.35765	6.32213	8.51691	7.33318	7.92143	7.31203	7.99444	6.23826	8.62578	5.40298	5.06515	8.26312	5.14967	5.2173	8.36965	6.02985	6.77483	8.66433	8.39543	7.69276	7.46199	8.27043	6.68715	4.35135	8.47186	5.22989	4.36211	7.51118	8.25155	4.04059	7.0315	5.05492	7.90237	8.88227	8.04037	7.69378	9.17608	9.09613	8.19005	6.18673	5.19484	7.61226	6.26657	7.2269	4.21169	5.30848
EPHA7	5.12901	3.57909	9.06535	3.35467	6.88672	5.40599	4.09993	6.21621	6.70484	6.47163	4.66086	6.19393	3.34416	4.16503	6.31147	6.20788	5.537	6.35793	3.43169	3.52755	5.04222	5.03185	5.2612	3.3352	5.46596	5.60888	5.85295	5.15407	3.90065	5.70839	5.72499	4.44347	5.80496	5.47046	4.40441	5.24665	5.46596	6.51745	3.53325	5.56374	4.64841	5.89353	5.59232	4.57137	3.35796	6.59484	5.43426	3.38321	6.63644
TRAT1	3.41724	4.70885	4.08608	4.27631	3.56867	4.48617	3.49119	5.09509	4.8696	3.90971	4.02409	5.3755	3.22036	3.40425	4.715	4.26241	4.02919	4.30067	4.26544	4.3875	3.73429	5.02949	3.09085	3.70758	3.95972	3.63506	5.71096	4.14022	4.7256	3.28869	4.30067	3.84493	3.65808	3.50772	3.48425	3.74235	4.78126	3.61665	4.48318	4.74436	4.07855	5.70609	3.78813	6.91449	3.50618	3.73384	3.65327	6.36188	4.96738
PRAP1	5.90582	5.2064	5.16141	4.6284	8.60926	8.12298	7.24339	4.89438	5.4624	6.60231	6.20587	5.65039	5.02149	5.08451	6.35737	5.93227	4.67701	6.04117	4.6113	6.94978	5.55181	5.45849	7.29682	5.09529	5.65039	4.76733	6.02594	6.06678	8.39731	6.28864	6.65634	5.95377	4.93569	6.88232	6.79876	4.92627	6.73369	7.25405	6.5553	5.96072	5.05986	8.35875	7.17463	4.83683	4.70465	9.02123	5.64335	9.64556	8.25702
HMGCS2	4.79302	4.5556	4.40762	5.88806	5.94772	4.49722	6.81733	4.39815	4.41924	7.20215	4.72124	5.57595	7.39306	4.70315	4.98187	4.51875	4.59319	4.7671	4.33342	5.19601	4.82261	4.73382	4.98187	4.69452	4.56213	4.52074	4.78276	6.20949	4.47909	5.11655	6.19722	5.03641	4.58456	7.74752	5.70471	8.77365	5.56278	6.13783	4.49045	4.95378	7.20387	4.40624	5.22875	4.36433	4.64478	4.66958	5.12665	4.51875	5.4386
HHLA2	3.25942	3.28187	3.39167	4.13859	5.27619	5.60701	4.59704	3.34387	4.05344	6.03774	3.64256	5.15362	3.41781	3.53143	5.94968	4.33201	3.49302	4.90671	3.63506	4.70947	3.67239	4.93569	6.17982	3.40597	3.79082	5.57874	3.69583	5.11086	6.66533	4.88794	5.5621	5.50156	6.72415	4.88691	4.78398	3.55678	5.3361	5.4792	5.25818	4.79718	3.51165	5.04886	5.73558	3.95905	3.55097	4.75875	3.52505	6.02466	5.81122
MLLT11	6.35416	8.46773	7.18603	6.28942	6.66101	5.9098	5.73963	6.38666	7.63809	5.92744	7.24812	6.27016	5.25135	6.96572	5.87205	6.4051	7.12379	6.27665	6.95727	6.36576	6.75205	6.03918	6.49958	9.54598	7.1918	8.24665	9.91873	6.53939	8.19177	6.62699	6.57748	6.30863	6.77727	5.67139	5.42558	7.18003	7.23623	6.08539	6.64703	6.38747	7.63858	9.99765	5.88658	7.74932	8.25334	7.73287	7.6977	5.45685	5.77468
TMEM178A	5.96772	5.65645	5.8739	5.92186	4.95074	5.92694	6.15103	5.59466	5.82687	5.86183	4.63688	6.37369	5.60888	8.05535	6.2855	6.68569	6.94611	7.13993	4.88129	6.07947	5.98064	6.02567	5.99455	6.23721	6.08171	5.75661	5.67568	7.94152	6.77786	7.89512	5.79321	5.41748	5.93913	7.18892	4.33179	9.05404	6.6622	5.81072	6.23902	6.0095	6.97119	4.54396	5.92381	4.56631	7.36175	5.04949	5.39389	4.03775	5.96844
LIN7A	5.13895	3.62198	3.95529	3.71055	4.13703	4.68517	7.51238	3.82893	5.02801	6.14745	3.94095	6.50612	8.25094	5.17437	5.71545	5.43995	3.89621	5.72333	3.66957	3.88251	3.85626	4.40362	5.40138	5.44197	4.55823	6.09552	3.6698	4.75705	4.16639	4.50166	4.14262	4.92726	6.48539	6.05587	4.76649	5.04669	4.50302	6.40538	3.75281	5.27888	4.34848	3.75746	6.00529	3.96251	4.39815	4.10602	7.26112	3.55555	5.3336
ZFPM2	5.10771	3.98034	5.06163	5.22124	4.73467	6.15922	4.83402	5.37019	6.13637	5.97581	4.18351	6.28398	3.88397	3.46631	4.82757	4.6943	4.18489	5.52776	4.60021	5.38329	4.85313	4.70947	5.02992	8.94964	6.97736	5.7164	4.50485	6.42968	4.68683	3.64778	6.36329	6.09851	4.09911	5.57642	5.15722	5.15384	7.26549	5.65505	5.57595	5.25529	6.42942	5.74539	4.28113	4.18208	7.67538	5.02105	9.04694	3.77493	5.93985
TMEM252	5.08106	5.09971	5.10531	8.66135	5.21307	6.42459	5.4792	4.24771	4.4402	6.12956	4.59047	6.14466	4.7731	5.22167	4.42128	7.99904	4.64537	6.60832	4.63688	4.72703	6.68657	5.26007	6.01689	4.18977	4.14797	5.46309	4.5677	7.83365	4.85988	9.13753	6.55779	5.93008	9.08374	8.31987	5.59232	7.47595	5.66005	6.09454	4.61549	5.62986	4.43042	4.48338	6.32134	4.48462	4.24872	5.77184	5.35026	4.45752	6.06603
TSPAN1	6.44478	8.68447	7.67413	10.9294	10.4743	11.088	9.99111	6.57524	7.37007	6.73581	6.7373	7.64859	7.44948	7.34012	9.46067	7.47711	6.42061	9.81814	6.09851	8.59773	7.2647	8.76648	8.45163	7.75489	7.09671	8.71109	7.01533	8.97378	8.65509	10.3501	9.13323	6.18126	10.9069	9.84738	9.20463	10.0887	8.34868	7.22478	9.07714	8.32727	7.56655	5.69579	8.30859	6.08539	5.21887	10.511	5.39016	10.2963	8.46839
PABPC4L	5.62541	3.93116	5.2769	6.20303	6.0678	5.81339	6.61636	4.98944	6.55779	7.8688	4.21582	7.19666	8.28585	3.80023	7.25445	5.33677	3.81403	7.41736	4.00538	4.64125	5.06988	6.31811	6.81915	3.90548	6.98684	7.25041	5.06714	7.17051	4.92076	5.61613	7.13285	6.83552	4.02622	5.55719	5.08471	5.31826	7.04761	6.87308	4.75785	7.02579	5.02494	3.87379	7.01566	5.33814	6.08539	4.95335	5.8495	5.85614	6.14769
STRIP2	3.72951	5.23773	3.83897	5.80164	6.12246	5.55419	4.99373	3.89979	3.81754	3.87524	7.87929	3.76023	4.07939	5.05875	3.85453	4.25033	8.24727	4.31333	6.97902	6.89743	3.85838	3.93565	4.63833	7.18892	3.83485	3.78701	4.87396	3.87339	6.17611	4.11364	6.51857	3.62095	4.06508	4.4894	3.75305	3.55801	3.95054	3.84425	4.75454	3.61542	3.55984	7.73519	3.60283	4.91198	5.10619	5.4929	5.38351	6.83614	5.72192
PKIB	3.79038	5.84028	4.98269	4.14615	5.35538	5.43361	6.96126	4.57865	5.14052	5.30647	4.87673	5.16408	6.63815	4.37319	5.42464	5.8059	4.83347	5.47374	6.60351	4.36152	3.92441	4.32917	4.45938	4.71007	4.9659	4.67885	5.88151	3.94888	4.89802	3.94447	4.15861	3.43414	3.81379	4.49165	4.0072	4.18917	5.45777	4.11992	5.14052	4.99395	4.06948	3.62904	5.48758	4.88129	5.12308	5.10083	3.94221	7.5226	5.61959
KCNJ3	5.75049	3.53887	3.54341	5.53724	4.86683	5.14098	4.13741	3.57984	4.27824	5.15565	3.69988	5.34339	3.67794	4.63728	5.4039	4.30951	3.74011	5.17866	3.60283	3.98077	5.36047	4.21375	6.91572	7.68883	4.33404	5.74945	4.12697	4.94651	4.03958	5.21175	5.5255	4.09849	5.32485	5.49922	4.76356	6.02194	4.97692	5.64021	3.57286	5.25709	4.1983	3.489	5.00327	4.0037	3.56159	3.74873	3.83705	3.9528	4.18611
CYP1B1	5.65762	5.64453	7.84696	6.81187	6.90155	7.16345	6.26682	8.19651	8.09036	5.18154	7.63138	6.03551	5.77279	7.09461	5.16109	8.68059	6.77028	6.58956	7.07663	6.62819	7.03084	6.15156	6.97637	11.7303	7.01858	7.90889	7.5496	7.22761	7.2095	7.28986	6.01904	7.38639	7.17859	6.35472	7.36252	8.74943	7.1599	5.60217	7.43676	6.68362	7.45399	5.24665	5.31141	6.18189	8.4953	7.72308	8.187	4.40908	5.39681
NPY6R	6.18138	4.28233	4.1702	6.71232	7.47474	6.59515	5.40736	4.14282	4.79967	6.96029	5.24755	5.81787	6.12703	4.83621	6.01287	6.07995	4.14144	6.27016	4.21052	5.29213	7.45593	4.89976	7.74428	7.19888	4.07605	5.56867	4.46381	6.19575	6.82476	6.53712	6.50387	4.66436	4.49806	6.98489	4.36572	4.15821	5.35912	7.68969	4.67085	6.62266	4.55454	3.96638	4.24075	4.35058	3.90652	5.83544	7.83561	6.49736	7.24261
SYNC	3.76741	7.83561	7.49643	4.0699	3.73452	4.57344	4.41924	4.77775	3.94595	3.97969	5.255	4.46439	4.74295	4.87888	3.96534	3.53548	5.13249	4.87568	3.70196	4.40382	4.49331	4.12416	3.78525	6.15688	4.86744	3.94953	6.04262	4.62587	4.68561	4.10937	4.1702	4.25478	3.61835	3.88758	3.78325	4.96091	4.52535	3.56641	5.58058	3.908	5.6029	3.55097	3.4602	5.37804	4.36171	4.53636	6.3224	3.40511	3.58831
ABCB1	5.05684	4.49205	4.84465	5.42603	5.75281	6.18648	4.89999	4.77585	6.00427	5.19993	4.59007	6.04386	4.12378	4.75239	8.01278	8.40509	6.034	7.16028	4.43104	4.86031	4.57758	5.91872	6.5115	3.83262	5.31167	5.43108	4.69731	6.42486	5.33976	10.6142	5.67399	6.87564	6.88358	6.23188	5.36201	6.95437	4.36152	6.30863	5.39932	6.54051	5.51157	5.24344	7.10782	5.23995	3.90235	5.0037	5.62938	4.91757	6.39458
DCLK1	4.75346	5.80375	4.65664	5.92694	5.96201	5.3034	4.38224	6.51632	6.24391	4.54007	3.54235	5.63545	3.44973	4.43373	5.70516	5.03835	4.19706	5.21663	4.29269	5.90413	5.1601	5.81998	6.24134	5.71911	6.7923	5.7068	5.69779	5.65573	4.91991	4.51654	5.16669	5.31029	6.48822	4.0333	4.75979	4.42046	5.87929	4.58437	5.22989	5.70609	5.55373	4.25581	3.72723	5.96962	6.22444	5.28248	6.65516	6.13684	4.47304
CD36	6.81856	4.6854	4.8681	6.24771	6.49796	6.39625	5.4899	7.46115	7.41658	7.39378	6.79812	7.27605	4.08138	4.58118	7.44989	6.16506	5.86824	7.07731	5.03532	4.90839	6.31515	6.83677	5.43995	4.68274	7.81741	6.33037	5.63009	6.81126	6.01261	5.05537	6.75532	7.12901	5.67212	6.93497	6.43591	6.00451	7.71213	7.61445	4.91437	6.74391	5.60242	6.0688	7.06619	6.05513	5.82759	6.05436	5.21047	4.84717	6.74236
NPHS2	4.95444	7.51968	5.90245	4.54356	4.46686	5.35561	5.02388	4.24356	5.65249	4.5085	4.97804	4.63622	4.66918	4.86683	4.55863	4.69731	4.85943	4.54906	4.7175	4.52354	4.39098	4.77693	5.54175	5.12643	4.75193	4.64376	4.42492	9.96713	4.49595	5.04243	4.78255	4.61467	4.82515	8.49395	4.44921	5.02322	4.54823	4.67124	4.63665	4.67184	5.07506	4.43146	4.57244	4.50066	4.31112	4.80671	4.78456	4.46583	4.72876
MME	6.22521	7.84754	4.93315	8.69367	8.81667	8.49731	7.25445	4.87781	6.57693	9.28437	8.16525	8.3704	4.49576	4.6284	8.6906	7.05753	8.38313	7.71089	5.21372	8.60997	9.19193	5.91695	8.20115	4.58947	6.13401	8.17358	7.89924	8.30485	8.32299	6.21855	8.65902	7.99147	8.89435	9.71972	6.3748	6.06158	6.47845	8.71667	6.75807	7.18179	5.78167	5.70746	8.3775	9.03315	8.70952	7.97784	4.61021	9.17859	8.00748
OGDHL	7.16448	5.77371	5.72215	5.16185	7.90237	8.82271	10.4621	4.69452	6.53739	8.28806	7.28772	7.79402	11.142	11.2295	6.99219	6.61433	6.68509	7.17356	5.92576	9.36383	4.70967	6.78024	7.52755	8.61464	6.68017	5.94822	6.679	8.54091	8.88309	10.2852	7.71347	5.55624	6.3224	8.65666	5.87319	8.44895	6.69187	7.21172	5.66149	7.39915	6.28889	4.98553	7.70075	5.56936	5.12987	6.44835	10.7172	6.41319	7.26255
KRT222	3.31524	3.29064	3.20181	5.59845	4.47033	3.23568	3.08824	6.07649	3.01787	3.23846	3.113	3.24505	3.24194	3.91732	3.00968	4.93885	3.39681	3.49036	3.10716	3.22726	6.01762	3.40172	3.28964	7.91327	3.24777	3.19236	3.61209	3.32339	3.17659	4.4408	3.25741	3.67307	4.65113	3.24881	3.30906	3.51647	3.24704	3.25206	3.2474	3.30113	3.77649	3.28521	3.1159	3.39021	3.04088	3.11733	5.55719	3.12894	3.25605
ESRP1	3.93196	5.25204	4.556	4.60605	6.00654	4.03349	7.50356	3.84272	3.92229	3.84579	3.79794	3.82175	8.54372	5.07442	3.91348	3.91936	3.96951	3.72514	3.91286	3.76698	3.77581	3.89979	3.92767	5.08561	3.92105	5.18353	3.82762	5.11746	4.90187	4.31753	3.73198	3.96229	5.9487	5.17461	4.07917	7.64476	3.97146	3.85429	7.45151	3.93306	6.2485	3.99769	4.02687	3.64635	3.92462	4.83872	3.92872	3.8613	3.98343
MMP3	3.3597	3.91224	4.22776	3.41433	3.50203	3.45496	3.38673	3.82076	3.71449	3.56867	3.35677	3.59443	3.28521	3.36895	3.39195	3.50441	3.49459	3.35467	3.45796	3.47124	3.58708	3.48453	3.58558	3.52988	3.521	4.89374	3.83594	3.36544	3.49724	3.50905	3.53016	3.59868	3.26744	3.49471	3.69334	3.47071	3.54825	3.38469	3.45437	3.41811	3.47413	3.48692	3.56013	3.42014	4.68414	3.32895	3.36749	3.35525	3.51708
EYA1	4.32076	4.1195	4.10378	4.20253	3.9378	4.05885	4.00661	4.05667	4.05786	4.08447	4.20467	4.05093	3.98343	3.96699	4.50046	6.65929	4.51798	4.08489	7.09767	4.10438	5.18977	4.29365	4.16207	4.3553	4.50504	4.2689	4.33608	4.43146	3.88979	4.22248	4.23369	4.07519	7.77233	4.03128	4.24237	4.33445	3.90202	4.09215	4.1983	4.27089	4.1847	5.97504	4.13799	4.84799	8.35612	4.90797	3.9778	4.12318	4.31253
CCDC80	5.29304	9.4509	7.69378	6.1832	5.25276	7.06384	6.87375	8.20993	5.83184	5.12416	5.66358	6.26371	6.71653	5.7973	4.51346	4.89097	8.61963	5.03921	6.37721	6.97216	6.15791	5.19903	5.5799	6.97803	7.07331	6.64158	5.06793	6.35605	7.08604	4.62883	5.69368	6.58737	4.99632	6.11882	7.59395	5.83569	7.359	5.32778	6.916	5.30939	8.92626	7.58504	4.66834	5.59303	6.82945	5.99809	6.35687	4.61467	4.77353
DCN	4.79841	5.99205	6.89391	6.61316	5.54872	7.10923	6.41952	7.44008	5.12506	4.7292	5.08908	6.35921	5.55928	6.40999	4.19121	4.86268	7.22619	5.38555	6.48984	6.61551	5.7925	4.41009	6.03701	4.99587	6.20303	6.1914	4.39398	7.10782	6.67251	4.62341	5.69946	6.36385	4.63482	7.10852	6.49958	7.8688	7.31808	5.31714	6.89294	5.34158	8.39543	5.89084	4.68062	5.63428	8.12125	6.10331	4.72898	4.09317	4.48698
ANK2	5.0144	4.05984	5.11767	4.53636	4.71522	7.33169	6.21335	5.16974	5.21109	4.84882	4.46665	4.92879	3.81709	6.32843	4.32583	5.63404	4.51489	5.42722	5.10861	5.59845	4.67001	4.60213	5.13826	7.33549	5.02258	5.29703	5.66078	5.75353	7.61488	4.70823	7.24052	4.8871	5.43583	6.04612	5.40231	6.93385	4.921	5.31425	5.62331	5.2221	6.8213	4.59441	4.29033	5.03816	3.63576	5.05726	7.32791	8.10833	4.65494
MMP9	7.78071	7.71213	7.18141	8.87508	8.23967	7.27496	6.83767	7.72889	10.5174	6.03551	5.83651	6.61551	5.89571	5.9396	5.15925	6.39571	7.01065	7.74477	8.35301	9.66063	8.61311	7.2402	7.32945	5.4929	7.64128	6.70722	8.52717	5.87367	7.13553	8.27164	7.67321	6.3248	7.41695	6.25779	9.319	5.45267	8.73658	6.83522	8.37417	6.15995	9.4466	6.95179	6.04262	6.71859	11.8601	8.30485	6.24984	5.56958	6.36056
RNF182	4.75851	4.63643	6.56012	3.52284	3.51246	4.78499	4.12903	3.5072	4.78126	4.14777	3.83422	4.64599	3.75008	7.16168	4.3691	6.01831	3.85429	4.24497	3.72376	4.20849	4.13659	4.39337	4.13193	3.59002	5.46309	3.72281	5.50086	4.97955	4.45812	5.5406	4.63336	4.41924	3.69654	4.26222	3.91547	6.09194	5.15034	4.05487	4.43516	3.86891	5.0727	3.57311	3.86348	5.6788	4.40218	3.77848	6.79174	3.7354	3.9524
SHCBP1	3.79284	5.81549	7.34401	4.11423	5.72713	5.27279	4.2156	6.19191	5.16119	4.4844	5.41527	4.78126	3.94888	4.1908	4.37943	5.47187	5.74563	4.87292	5.99333	5.30869	4.64781	4.78189	5.86138	4.66877	4.98205	5.00414	6.65018	4.31272	5.48565	3.76313	4.33239	4.25132	4.78255	4.55476	3.65279	6.02594	4.90226	4.54316	6.49877	4.67541	4.45731	7.32604	4.48031	6.3397	7.51158	5.84637	4.33077	5.46078	4.68062
PPP1R14A	6.51094	4.61612	7.07025	6.23978	5.38329	7.81922	6.64818	5.17877	7.49007	6.3663	5.59702	6.39758	5.14905	5.00046	5.49831	5.26185	6.01439	6.72594	6.18163	8.30917	6.86807	7.10248	6.28757	4.46017	7.49921	6.73215	4.99204	8.02432	5.65645	4.86915	6.8839	7.49796	4.82365	6.18856	7.49486	7.59641	8.12413	6.38	8.00798	6.91729	9.5614	5.754	6.0441	5.57619	4.34994	6.67637	5.3105	4.56153	5.67924
P2RY14	5.09419	5.88829	5.4386	5.51991	4.7528	6.67928	5.37919	6.88736	6.39119	6.14769	6.53158	5.91517	4.37804	4.53374	5.51434	6.84877	5.90514	6.78081	5.25226	6.35033	5.38121	6.33944	4.00001	3.75678	7.39343	5.80449	4.86031	5.82535	4.65238	3.88694	4.99587	6.20117	4.58138	6.62583	4.85162	5.41053	7.15064	5.33404	5.43248	5.80327	6.03082	3.77493	6.56856	6.01541	3.66608	4.6677	4.32938	5.87732	4.98575
ABCB5	3.84838	3.97589	3.85178	3.89958	3.79442	4.12697	3.95756	3.77446	3.94846	3.6404	3.98782	3.69218	3.75566	3.96251	3.7166	4.37057	3.88457	3.82633	3.80023	3.8926	3.9466	3.83832	3.809	10.3807	3.84091	4.86433	5.60701	3.667	4.04609	4.23835	3.90212	3.93478	3.80199	3.82936	4.17766	3.78036	3.846	3.76496	3.77826	3.849	3.73291	3.76584	3.87081	3.68526	3.9645	4.41924	10.537	3.87379	3.92615
EDNRB	8.96651	6.23646	6.60665	6.98458	7.56009	8.06221	6.87689	6.53413	8.98317	9.52751	6.68074	9.64556	5.33587	4.53437	8.74223	7.00339	6.17523	9.52454	6.26552	7.77043	6.27773	9.12767	6.98327	4.81111	8.78388	8.06819	6.27641	9.32943	7.07093	6.00703	9.74077	9.27562	6.72119	9.49081	9.4509	8.85143	8.03283	9.71274	6.40594	8.70394	7.03752	4.80834	8.87508	6.75384	6.43262	6.47788	4.75216	6.67344	8.40976
SCN4B	7.67538	4.07073	4.63044	6.60555	5.24301	6.34781	5.59726	5.056	7.29604	6.61522	5.79299	7.39149	4.64944	5.6278	6.09269	5.18643	5.37964	7.55889	4.79945	6.65575	6.95208	6.18138	6.02428	7.29023	7.91426	6.19575	4.73752	6.56708	4.87825	4.41093	6.6161	7.34812	5.79227	6.72624	7.82023	5.49201	7.74283	7.50394	5.24978	6.73038	7.74332	4.16777	6.96096	4.66855	4.52985	5.10815	7.73474	4.16979	5.92381
GFPT2	5.20127	8.14925	8.93835	5.2151	6.8594	4.94562	5.51222	8.4829	6.33516	4.7667	8.89527	5.37331	5.88589	6.34402	4.65599	7.08911	6.96158	6.55838	9.80819	6.44998	7.04565	4.78645	5.35586	4.81803	7.21207	6.18241	6.59073	6.07674	8.66592	5.82736	6.25804	6.13927	8.30736	5.39568	4.89593	6.15077	6.71567	4.86704	7.98465	6.23569	6.57162	10.0935	4.84608	8.09562	8.72532	7.80225	6.58084	6.53683	5.47485
MAGEB2	3.77446	9.55526	3.52908	3.57041	3.58485	3.62951	3.53424	3.43528	3.47633	3.49409	3.50618	3.45496	3.43275	3.63454	3.35434	3.40856	3.70147	3.44499	3.70502	3.80788	3.65952	3.68151	3.64161	3.40114	3.50618	3.57016	5.14943	3.51869	3.45248	3.57065	3.72119	3.56487	3.8224	3.50125	3.57909	3.34152	3.4247	3.71683	3.45328	3.64064	3.37559	3.52126	3.45383	3.72493	5.77492	3.46489	3.55928	3.4213	3.73986
LEFTY1	4.52515	4.23308	5.18421	4.40199	4.00188	4.32135	4.17548	4.4852	4.29903	3.92853	4.33874	4.04274	4.33117	4.23876	4.10075	4.1568	4.43309	4.33913	4.50302	5.36223	4.4606	4.49248	4.87191	4.1274	4.0855	4.04274	4.24592	4.39676	4.14739	5.56889	4.02752	3.94301	6.85847	4.45711	4.75785	5.14075	4.7902	4.08425	5.14372	3.96514	4.4408	4.1066	4.37095	4.28532	4.31152	4.33853	4.56994	4.78359	4.32583
REPS2	4.72766	4.50046	4.57137	5.74302	7.05205	6.71537	5.54893	5.15474	6.14493	7.06993	9.18745	4.8538	4.10558	5.36974	6.3397	6.62266	5.29659	7.60284	7.03348	6.36302	6.81451	4.72207	6.82886	5.82613	5.24413	6.37158	5.45427	5.82736	6.44588	6.54199	4.93756	7.19491	8.53592	6.87026	5.48589	6.32817	5.93082	6.97407	6.49851	6.1582	4.68952	7.25186	6.51745	5.71432	5.69852	8.03442	5.27735	5.74302	7.37239
CXCL9	7.29309	11.6266	7.68184	6.70603	7.21896	8.01505	7.11606	9.70365	9.34266	7.23297	6.50527	10.7435	6.47598	4.78499	6.65575	9.0675	6.53356	8.15091	6.9438	9.41814	6.00231	10.6389	6.75596	5.40781	7.48963	7.46714	11.0247	8.70634	9.49226	5.05205	8.41436	7.08333	7.56361	7.24299	8.74145	7.27858	9.13858	6.59452	8.48976	8.38375	7.05984	9.06042	8.13539	10.9951	6.80399	6.5691	8.36075	11.1154	9.13206
EGFL6	3.46051	4.40624	3.58679	3.96514	3.60527	3.71267	3.74829	4.67375	5.93129	3.69988	3.54595	3.60671	4.57325	3.78325	3.78325	3.78813	3.74257	6.1227	4.24135	3.63677	4.16918	4.29152	3.84469	3.48107	5.36114	4.64438	4.00825	3.62119	4.10955	3.42885	3.75055	3.4471	3.97185	3.70851	3.81709	4.05426	3.9399	3.47762	4.63171	3.5485	5.60725	4.97088	3.70921	4.00934	4.24075	5.55032	3.67167	3.6719	3.59193
RHCG	4.88459	4.8912	4.57078	4.40845	4.49887	4.74047	10.5333	4.70989	4.73752	4.96715	4.65218	4.58562	11.6658	4.90671	4.61194	4.36094	4.7528	4.70272	4.72684	4.66026	4.22953	4.58398	4.57264	5.22787	4.71415	4.77498	4.71934	7.00171	5.27801	4.94694	4.77834	4.76588	4.71127	6.39042	5.19601	7.64128	4.64537	4.60126	4.43352	4.78478	4.91266	4.45314	4.8174	4.75193	5.11946	4.84882	5.58455	4.39914	4.51674
PPP1R14D	4.57717	4.6044	4.67046	4.7528	7.60851	7.66154	6.53383	4.44387	4.76876	5.79372	7.50356	4.66791	4.93843	5.16254	7.07093	6.88953	4.93991	5.79608	5.14882	6.93356	4.60234	5.14812	4.66457	4.48379	4.675	4.45571	4.51654	4.6654	6.40211	4.87191	4.74106	4.86496	8.46115	4.88212	5.19464	4.61173	5.61587	5.24017	7.51158	5.05557	4.94584	6.05749	6.4631	4.51592	4.52905	7.48643	4.48597	7.64859	7.84309
ZNF300P1	4.45773	3.80724	3.89936	6.19271	4.18189	4.33281	3.74873	3.70758	4.55235	7.16412	3.72419	4.89481	3.47364	5.88635	3.82043	3.62642	3.83661	5.92987	3.60035	4.40684	3.87442	3.3274	4.04381	4.72039	4.24535	3.80569	3.55766	4.30414	3.64538	3.58389	4.48238	4.27089	3.40945	7.08983	3.67284	5.84779	3.89346	3.82979	4.44757	4.03128	4.53265	4.1276	4.9152	3.73797	4.09703	3.65834	3.67353	3.56384	3.85006
MTCP1	4.12098	4.1072	5.25818	8.82764	6.75748	6.03819	4.96196	5.30015	5.54872	5.60056	7.28986	6.78689	4.91049	4.31793	7.02217	6.3432	3.95054	6.18909	4.6	4.82301	7.29569	6.7866	6.30517	4.2743	6.00181	6.32213	4.99502	5.5287	4.6462	4.50445	6.92026	5.04243	5.17755	6.15535	4.93096	4.65784	5.19815	5.58172	4.8698	6.80399	6.54111	4.21964	5.5508	5.6997	3.8081	5.06623	4.68149	5.28381	4.93527
ANGPTL3	3.2474	3.43867	3.29607	3.24811	3.75414	6.77607	5.47706	3.34239	3.34533	3.58291	3.41376	3.43924	3.36252	3.75978	3.24602	3.84469	3.38673	4.79547	3.33729	5.32095	3.44249	3.61451	4.37341	3.51482	3.23073	3.36749	3.63892	3.757	4.43983	3.44835	3.769	3.46188	6.73674	4.40826	3.36163	4.00805	3.23073	3.60671	4.87107	3.54082	3.59534	3.41781	3.40172	3.46135	3.3785	5.49476	3.37587	6.28473	3.49648
IGFBP2	6.08515	6.7572	6.8232	6.19775	6.28651	6.46392	6.49676	7.07494	7.22083	6.22782	7.09599	6.16379	6.18776	5.8236	4.38045	5.47305	6.96539	7.51605	6.92641	6.42141	7.76142	6.95798	6.46665	5.53632	7.68697	5.99082	6.24288	7.86104	8.85664	5.94994	6.16355	7.33096	5.45197	7.38491	8.38187	9.80819	7.87983	6.8772	8.44958	7.41695	10.5566	11.1533	6.13135	5.63522	10.4283	9.95038	6.73943	5.81953	6.16204
TUBB4A	4.91007	4.71813	4.88481	4.00825	4.18332	4.4024	4.63127	4.28091	4.64498	4.14636	4.51406	4.78359	5.02082	7.24972	5.54653	5.21047	4.63399	4.19303	4.35332	4.4018	4.10879	5.26432	5.57434	8.43662	5.78095	4.50908	4.78814	4.53841	4.49806	6.02835	5.17437	4.54316	4.47345	4.64376	4.76958	4.26342	4.17567	4.92179	4.51305	4.921	4.74502	4.29564	5.95503	4.47074	4.53353	4.94989	12.2315	4.70214	6.04386
GAPT	3.64947	3.39918	5.7298	4.62054	4.60461	4.66415	3.64801	6.08494	5.27257	5.70955	3.73198	5.20576	3.77962	4.42088	4.71415	6.6907	4.36572	4.25787	3.47312	3.67771	3.59295	3.62479	3.96534	5.99006	4.91481	5.38901	5.66381	4.32418	3.51323	3.8926	3.9028	4.04318	3.71007	4.21601	3.48212	3.68802	4.98378	4.99565	4.9903	5.09462	4.55967	3.50493	5.64808	4.68765	3.76835	5.33208	4.70359	7.73789	5.73747
LGALS2	10.0046	6.56299	5.22854	5.92841	9.57867	9.96295	8.5209	5.50685	5.93766	10.0199	6.73215	9.29301	5.22966	7.11232	10.378	8.23114	5.92451	9.13323	5.51525	9.1309	4.87568	9.11232	9.5614	5.68538	6.91099	7.64649	6.52829	8.91968	9.67762	9.17504	8.30307	8.97755	9.69456	9.58356	8.50162	6.94823	7.94922	9.91655	6.9373	9.54276	6.95932	8.0318	9.61073	5.97772	5.62283	8.44052	5.84418	9.19774	9.70169
S100A12	7.81027	4.84974	3.82959	3.97083	4.07194	4.3479	5.0701	4.42962	5.07313	4.65845	5.80907	4.81275	3.57881	4.14677	4.51035	4.75644	7.0608	5.76017	4.35311	4.85313	4.29288	3.61858	4.68434	4.64294	5.48518	5.81027	6.30814	4.39337	5.41748	3.53016	6.11857	7.22545	4.48177	5.57311	4.34299	5.14661	4.33179	3.92638	4.13919	4.49432	3.83217	6.38564	6.16204	4.96284	3.97523	4.09338	5.38787	3.5689	4.48257
RRM2	6.20196	9.59967	8.86378	6.3811	7.8003	7.44361	6.29184	8.68219	7.4888	6.28573	8.24252	6.92026	5.09441	4.57137	7.07632	7.5108	8.53592	6.68596	9.16396	7.39378	6.32684	6.31069	8.75185	5.5621	6.659	6.63588	9.03628	5.58551	8.09562	4.68434	6.48453	5.01653	7.07526	6.03475	5.12308	4.43227	5.92139	5.81317	8.25455	6.06227	5.75925	9.51092	6.44108	9.6124	8.84538	8.31048	5.62004	7.01699	5.84565
SLC22A12	6.00875	5.52915	5.0197	5.01842	5.2453	6.08369	5.86253	5.07485	5.30402	7.32569	5.40138	6.78903	5.78095	6.36056	7.49643	5.19089	5.27207	5.84923	5.26073	4.90671	4.73172	5.83161	5.06602	5.42944	5.01738	5.05163	5.19001	5.91002	5.18665	7.8932	5.3034	8.51957	5.44972	8.33866	6.32606	6.84423	5.11325	9.56445	4.92481	5.9462	5.73389	4.91733	8.38642	4.95357	5.44132	5.33139	5.66622	5.53843	7.64859
CLIC3	4.18998	7.00011	6.85529	4.73424	4.36008	4.46503	4.333	4.3426	4.68887	4.45938	4.70214	5.34703	3.76336	3.9645	4.81488	4.63688	6.26735	4.66958	4.15366	5.11767	4.47155	4.82556	6.33405	4.28974	4.67105	4.06569	5.30783	5.07852	5.74492	5.10793	4.26137	4.04935	4.26035	5.40067	4.5679	4.40583	4.94627	3.89871	6.44864	4.82155	5.03985	7.53242	4.06719	4.92926	5.65954	6.4238	4.06161	5.96603	4.78604
CENPK	3.75723	6.83244	7.19888	5.21443	6.75354	6.3157	4.38322	5.96376	6.23978	5.24846	6.62759	5.44452	3.61905	3.76809	6.64217	5.3729	5.93376	5.3731	6.38242	5.57572	5.02736	4.93926	6.79535	4.66499	5.3334	5.02779	6.56856	5.11545	5.98958	4.11972	5.42581	4.46242	5.38787	5.32323	3.54235	4.08058	5.31425	4.7361	6.33299	4.97001	4.89739	7.76773	5.20105	7.35376	5.54723	6.22908	4.31449	6.1832	4.43779
AC007389.3	5.72641	5.69827	5.41235	5.58172	5.60385	5.15146	5.83958	5.16825	5.24551	4.57386	5.30939	4.75936	6.06603	6.33571	4.40762	4.61655	5.27069	4.54971	5.55977	5.28447	5.0592	5.78721	5.06515	5.6693	4.97671	4.75624	4.82047	5.10686	5.52823	5.46687	5.59986	5.38692	5.37439	5.23951	7.21861	5.23123	4.95444	5.51803	4.97804	5.05832	6.10805	5.36158	5.47305	4.7361	5.32276	5.71618	5.66333	5.5071	5.26226
FMO2	8.01056	5.31141	6.33491	4.91733	6.97637	6.71421	5.80472	6.26191	8.54372	7.9857	8.75601	8.66592	4.59359	6.55501	8.63471	7.06048	5.09817	8.16576	5.49384	6.6436	7.53814	7.84453	7.38639	5.28626	8.69607	9.02623	6.00974	6.92641	5.0312	5.22341	6.60112	6.51408	4.82177	8.91494	8.10513	7.85855	7.26357	9.09296	6.27824	7.80501	7.25333	5.31471	6.97672	4.80755	6.14674	7.59905	6.95798	4.50787	6.68074
PEG10	7.09358	4.37902	4.87459	4.07957	7.4015	6.76097	5.78866	4.35948	5.40231	7.26762	4.56751	6.94978	5.33183	6.53939	6.46498	5.36997	5.29858	6.484	4.45938	4.44188	3.97478	5.22523	8.30736	6.21258	6.09602	6.06905	6.23746	6.62931	5.42603	6.26245	7.8003	6.17832	7.28183	8.45163	6.20736	7.31243	6.0645	7.4812	4.6	6.71567	5.11746	4.69687	6.76786	6.63527	7.28845	5.9811	5.88295	4.20292	6.14168
ANKRD22	4.70252	8.02912	6.29131	4.53023	4.40499	4.95772	5.63009	7.44361	5.16496	4.93164	5.51899	6.76072	5.29767	4.73172	4.76525	6.85033	6.09627	5.1137	6.18598	7.45868	4.69919	5.65016	5.13962	5.1148	5.68164	5.99205	7.5733	5.70042	6.58677	4.58076	5.15679	5.63881	6.2367	5.54701	4.95074	6.41651	5.68113	4.9359	6.82259	5.48425	5.28447	6.7572	5.11238	8.89102	5.14683	5.12052	4.94056	9.32943	6.51604
DACT1	5.80758	8.66976	6.11525	5.77711	5.55855	6.89294	7.42081	6.13536	7.1028	5.12967	4.85897	5.64523	8.51895	5.71955	4.33893	4.2031	5.03728	5.62049	5.46782	5.78652	5.55719	5.00946	4.8681	7.20101	6.88517	6.68925	5.1623	7.02674	4.7556	4.38263	6.14144	7.16982	4.48134	5.47573	6.22782	6.42543	7.89614	5.50946	6.1574	4.92458	7.13756	4.37422	4.33139	4.62341	8.03497	5.09994	7.07061	4.58456	4.46123
RSAD2	4.86915	5.49922	5.77347	5.08041	5.08951	6.12738	5.13446	7.7307	5.11632	5.46527	4.63293	6.56071	4.58542	4.20094	5.48518	6.21309	6.31491	5.58668	7.64689	5.9516	4.94971	6.32265	4.52419	5.46285	5.92817	7.30868	8.88566	5.67546	6.23621	4.79824	5.82482	5.48312	5.43653	6.51688	5.40897	6.1985	6.54316	6.38613	7.10476	6.53021	5.78819	5.30985	6.30765	7.23985	6.37238	4.92835	5.09688	7.07221	6.16736
SDPR	6.46065	5.49666	5.02388	6.14597	6.44341	7.47711	6.6473	4.68001	6.90093	7.57453	4.81965	7.36821	4.93547	5.99305	6.92312	6.43073	4.85271	8.72764	4.13919	5.48565	5.76328	5.95974	6.0549	6.85069	7.91074	5.95825	5.34158	8.67836	6.13915	6.38638	8.52717	8.91494	5.34679	8.59412	7.98251	8.45782	6.7724	8.35422	4.99331	7.97105	7.21134	4.85336	8.20755	5.78049	6.01927	5.4486	6.46775	5.15012	6.75236
NR4A2	5.6075	6.14239	5.12032	7.28438	5.32209	5.6063	6.14621	6.25621	8.82948	8.17113	7.8212	7.91124	7.88776	6.72744	5.39932	6.60749	6.75778	6.46523	5.79993	5.81122	5.7623	6.02141	4.32216	5.06297	6.15284	7.53852	5.96725	6.06227	8.08513	4.75725	5.79299	5.85173	4.36472	5.02758	5.74733	5.97723	7.17497	6.1582	6.57136	5.86205	7.5169	8.62722	7.77469	6.55189	7.65593	5.36819	4.6677	7.13827	6.47788
DSCR8	4.35251	4.26261	4.09828	3.85858	3.8488	3.86826	4.13236	3.88038	4.10623	4.20749	4.07812	4.0315	3.77243	3.81269	3.82804	3.92505	4.23565	3.80943	4.14202	3.81883	4.16817	4.03695	6.9085	4.17686	4.12517	4.16124	4.29465	4.01389	3.97105	3.88585	3.94095	4.39853	4.05747	3.79571	3.88738	3.95695	4.20728	3.98592	4.04993	4.11116	3.91547	3.86395	4.1908	3.86593	3.8852	3.95361	4.14938	4.00045	4.10579
FOLR1	9.40711	7.15231	10.3616	5.96479	10.1882	7.84164	6.94228	4.82576	7.72975	8.97755	5.37331	9.16503	5.10174	11.315	7.65632	9.54598	5.25986	7.8659	4.78876	5.55277	5.5036	6.08171	7.81741	5.97945	6.64217	9.00874	6.79444	8.22176	8.54302	10.1784	6.90471	9.0512	9.09613	8.90753	6.37531	10.0112	8.36134	9.59967	7.35639	9.619	7.55631	5.6464	9.33748	5.54606	4.20232	8.27402	8.07143	7.58878	9.75148
RCAN2	7.80592	6.86553	6.18934	8.35678	7.41023	9.00188	10.635	8.03617	8.85306	10.2532	6.65281	9.41282	11.0096	7.15263	7.74237	8.25272	5.89896	9.12648	5.57146	8.54804	7.23339	8.35678	7.56993	10.5534	8.75766	8.80492	7.05346	9.80819	9.67596	7.6204	8.47672	8.12867	10.1082	8.34929	9.62405	9.075	8.59925	10.2638	7.43253	8.49188	8.64817	5.32231	9.47068	6.39625	6.9925	6.62789	8.48848	10.796	8.15319
SPESP1	6.01617	3.53375	3.77871	3.54877	6.35446	3.71751	3.56843	3.99033	3.48267	4.54971	3.40395	3.93887	3.45215	4.401	4.87568	3.35276	5.57874	4.1278	3.78547	4.04567	3.83919	3.50854	3.4726	7.69009	4.14938	3.61691	3.78768	5.26929	3.42993	3.39108	4.78315	3.51869	3.79591	4.73065	3.36003	4.15122	4.68043	4.39796	3.99789	4.2172	4.14491	3.16372	4.29192	3.92126	4.78063	3.31492	3.14262	3.49855	3.92083
MFAP4	5.24323	5.881	9.02123	5.92405	5.87205	7.91934	7.0325	7.24226	6.74969	5.28046	5.04071	6.32684	5.84295	6.00006	4.4024	5.26586	5.55419	5.55181	6.11578	7.50156	5.40231	5.1873	6.50872	4.7667	7.2566	6.9464	6.16585	8.05799	6.34266	5.23167	6.36548	7.64607	5.056	7.17187	6.93796	8.41436	8.19236	5.71501	7.97412	5.44926	10.628	7.29062	4.97214	5.31119	7.64518	6.89995	5.15034	4.82405	5.23055
CCNB1	6.07154	8.76255	7.61656	4.84127	6.77844	5.6913	5.26518	6.35143	5.56656	5.1148	6.93158	5.18709	4.45412	4.79507	6.14769	5.58482	6.538	5.4395	6.76244	5.84028	5.26027	4.70528	7.08502	5.22362	4.82673	5.05054	7.46561	4.84485	6.0572	4.4654	5.2142	4.33468	5.62634	4.6677	3.83462	4.61152	4.79654	4.90266	6.72837	4.93696	4.75304	7.86157	4.51798	7.18818	6.67874	7.29079	4.79213	5.15541	4.64355
NDC80	4.04296	6.86525	7.39029	5.32597	5.29258	5.86923	4.23565	6.4951	6.66251	5.23502	5.27257	5.81269	4.3728	3.61133	6.11476	5.27391	5.20729	5.61887	6.55296	6.86776	4.93249	5.66381	6.36188	4.3153	5.77828	4.73488	6.47571	5.59795	5.9971	3.7078	5.20532	4.72622	4.21256	4.6476	4.06569	4.3549	5.98567	4.87068	6.69247	4.86621	5.36997	6.50727	4.72432	7.57794	6.79259	5.897	4.3019	6.02241	4.83411
LOC145474	3.85199	3.87696	4.45917	4.36734	5.04741	4.80504	4.14307	4.39496	5.02061	6.19393	6.02737	5.98933	4.14656	4.22286	6.26371	5.75801	5.45964	6.26476	5.73219	5.31845	5.6761	5.53079	4.64821	3.83855	5.78238	6.39014	5.29191	5.5243	4.65093	4.70607	5.29992	5.97945	5.93716	5.12665	4.64985	5.3673	5.83428	5.41366	5.34866	4.94369	5.3176	4.10222	5.37439	6.11156	5.79947	4.19625	4.46343	4.77855	4.5795
KIF20A	4.37156	8.06268	7.51524	4.54396	6.71505	5.22721	4.4894	5.70259	5.46951	4.51158	6.6473	5.07506	4.43414	3.86173	5.6464	5.74229	6.87468	4.84588	6.98293	5.02237	4.67903	5.0514	7.20771	3.8672	5.35701	4.71374	7.471	4.77813	6.38403	4.11483	4.95575	4.25227	4.5558	4.09725	4.74106	3.67071	4.91777	4.47707	6.59632	4.78211	4.79902	7.93949	4.37721	7.06348	7.9049	7.03981	4.23182	5.27069	4.64438
ENPEP	9.57867	5.01418	6.15308	11.0247	11.1991	10.1008	8.56851	8.46115	10.5082	11.1305	6.78839	10.9247	3.83943	4.27409	11.2623	9.62879	6.42191	10.7435	7.6973	8.32049	9.74621	8.69135	9.49855	10.6497	10.3807	10.7593	9.20233	10.4894	10.7353	8.77127	9.76972	10.0001	10.7553	10.9755	9.66226	6.937	9.36383	10.7796	8.08072	8.9187	7.24593	8.09893	10.5731	8.28248	7.57119	9.26582	7.47022	10.5404	10.4465
PCDH10	3.50695	3.53806	3.55928	3.54106	3.62342	3.85687	3.60402	3.66301	5.37919	3.85497	3.48425	4.39735	3.5606	3.61978	5.18421	3.56231	3.56309	4.00679	3.62531	3.72236	4.87547	3.6338	3.4611	3.60744	5.03335	5.17036	3.50072	5.45872	3.72584	3.56718	4.35117	4.63875	3.49119	3.70964	3.56991	3.75723	4.92726	4.25303	3.54595	4.17137	4.13028	3.29642	3.68551	3.48425	3.385	3.74894	8.22697	3.50283	3.45496
NTN4	8.40192	7.29309	7.43288	7.21428	8.01003	8.17174	7.84984	8.25518	7.03084	9.50633	6.61285	8.38061	7.64562	6.85033	8.74533	7.66666	5.74034	8.99693	4.88084	6.27144	6.65844	8.20821	7.17258	6.30067	8.95922	9.24721	8.06268	8.41232	7.23623	6.80758	8.82518	7.27416	7.47391	8.64817	8.65509	10.2852	7.52345	8.45782	6.65575	9.22592	7.92949	5.11855	9.89168	6.74634	6.58315	6.51263	7.45628	7.83316	8.28062
TF	4.81468	4.35156	4.28091	4.45294	8.17113	4.18878	4.34446	4.3691	5.10439	4.30814	4.22351	4.44227	4.2031	4.54049	4.25303	4.60106	4.65452	4.53539	4.3527	4.4177	9.15607	4.58988	4.5568	4.23608	4.50284	4.82026	4.20507	4.35193	4.36513	4.41433	4.97671	4.34426	4.57449	4.31978	4.5572	4.50243	4.30731	4.37195	6.01336	4.28911	4.27802	4.59623	4.46185	4.15842	4.77144	5.38351	4.20012	4.29014	4.29843
ATP8B4	3.43867	4.14797	5.93641	5.57548	4.3373	5.81931	8.16815	5.64546	5.3034	5.07117	7.43842	5.25093	9.13753	4.05885	4.3426	5.23442	5.71241	5.07957	6.44478	4.64272	4.28793	3.86593	3.83065	4.88436	5.28492	5.99982	5.87832	4.58276	4.51098	4.04688	4.48721	4.83498	3.95905	4.69016	3.9378	4.6464	5.7519	4.58257	5.0729	4.66877	4.85445	5.04029	4.78478	6.46417	5.99082	5.19601	4.32237	5.67738	4.65764
GRAMD1C	4.25498	4.81214	5.38739	5.9098	7.3177	7.32645	7.29833	5.15722	6.22908	7.12828	4.09952	7.32753	8.71667	6.65844	7.93096	7.11064	3.91203	6.88517	4.88668	6.69279	7.21896	6.4329	7.30097	6.62296	6.48453	6.75807	4.43002	6.82825	6.72683	6.76758	6.85593	5.7068	7.91327	7.08639	5.69104	8.40056	6.63961	7.359	5.99481	5.76923	5.98266	4.21275	5.67831	5.60952	5.28647	5.29052	4.50222	7.83703	7.35068
DEPDC1B	3.72699	5.67568	5.72192	3.57631	4.78043	4.21071	3.71983	4.84649	4.29642	3.65543	5.44995	4.59726	3.74761	3.40945	5.48758	4.43819	4.92726	4.07664	5.5243	3.87696	3.86395	4.0622	5.73604	3.28249	3.93478	4.00599	5.70929	4.03613	4.21882	3.64348	3.83286	3.75257	4.06063	3.92725	3.37005	3.45383	3.79397	3.65618	4.86331	3.89411	3.94405	6.11985	4.00538	6.06029	4.06948	5.24846	3.51114	4.11563	3.58585
BTBD11	3.9112	5.68399	5.05402	5.52963	6.76216	4.12239	3.81974	5.84122	4.90226	3.99265	6.30359	4.22188	3.66396	5.7351	3.71941	6.10179	4.22953	5.8224	4.06678	4.91859	5.76111	4.31978	6.56799	4.55843	5.35122	4.40928	5.41075	4.7371	5.64736	4.59869	4.62923	3.75586	4.04504	4.6727	4.01472	6.17575	4.58604	3.78393	5.68514	3.77446	4.66877	5.23639	4.04873	4.65987	5.03036	6.53047	4.63421	6.06985	3.89193
CHL1	3.29699	3.49195	3.79191	4.34193	3.2269	3.72628	3.36835	4.70655	3.38057	3.62738	5.07527	3.50152	5.46501	5.72641	3.51635	3.63121	3.25313	3.521	3.06735	3.80221	3.18487	3.27827	3.83616	7.49606	3.32401	3.17621	4.05786	4.50222	3.71337	5.51386	3.17698	3.29376	3.83811	5.2064	3.20515	5.69875	3.85649	3.48953	4.39999	3.36573	3.7801	3.3421	3.37147	3.32801	5.85442	3.53963	5.37528	3.36312	3.3274
LAG3	4.83266	7.67022	4.78234	4.29942	4.30028	4.41924	4.50992	5.6686	4.80446	4.76754	5.68967	6.1796	4.23773	4.61467	4.90883	5.9492	5.80833	4.60895	6.07402	7.08137	4.2215	6.24288	4.20488	4.13463	4.6677	4.07216	6.46252	4.6727	6.199	4.34193	4.60853	4.41846	4.58726	4.3027	5.80522	4.77855	5.33208	4.85228	6.8167	6.09878	4.68192	7.19598	4.81275	8.68447	4.68274	4.76211	4.89141	8.53078	6.25727
SCIN	4.72039	5.87904	6.12449	8.36584	6.84237	5.23728	8.28428	6.54985	6.52224	5.27232	5.10307	5.39796	8.54581	7.01178	4.52848	6.60861	6.45379	7.10408	5.06793	5.57503	7.30759	6.66906	7.41931	8.31739	6.44108	7.03981	5.98443	6.96126	5.78334	8.35301	4.64985	4.74066	7.31846	6.80999	4.63622	8.34558	5.82825	4.98247	5.2534	5.83352	5.35331	4.56233	5.41596	5.70562	4.97692	5.67399	6.79753	7.38869	6.01122
NOX4	7.27671	4.39037	5.37087	5.61025	5.36114	7.52755	6.98098	7.91426	7.81831	6.98868	5.7956	7.13148	6.80154	4.80854	8.03557	5.58058	4.45294	6.63036	8.19005	7.92193	5.70657	5.60266	4.73086	8.05361	6.9085	6.27641	4.84927	6.33703	8.17943	6.72415	6.56359	5.94572	7.88871	7.27416	5.54916	4.9152	6.25301	7.08365	5.62191	5.98958	5.14812	6.96831	5.34795	5.4976	6.21649	7.5977	6.72269	7.20421	6.34373
LOC440173	4.2314	6.15053	7.07429	5.35051	5.68988	5.96772	5.67257	5.7164	3.90592	7.26182	4.39256	7.11536	4.11972	5.08604	6.25621	7.37421	5.51457	5.70979	6.41404	4.00805	6.13536	6.59854	6.29906	3.95013	3.81116	3.92421	4.09891	6.85343	6.33653	4.00147	5.17822	5.80327	4.53986	5.79777	6.77546	5.42944	5.54536	6.81515	6.06754	3.69002	4.16286	5.01758	6.50527	4.63994	4.44002	5.14438	6.59854	5.92067	3.89819
LOC285768	3.55149	3.5611	3.33278	3.67865	3.39918	4.44188	3.85519	3.48982	3.27076	3.88694	3.47657	3.86029	3.55173	3.50176	3.48453	3.75372	3.52604	4.33874	3.4314	3.34745	3.42365	5.1517	5.08169	3.49009	3.27827	4.55033	3.48372	4.17179	3.49909	3.87952	4.99892	3.53575	3.56309	3.85563	4.87975	3.36341	3.68755	3.57556	3.36689	5.13735	4.02665	3.48134	4.42312	3.37504	3.57631	3.34922	3.44169	3.3643	3.59846
RGS18	4.376	4.14043	6.60612	6.11007	4.80733	6.26707	4.68581	7.29757	6.23421	5.93985	6.82194	5.92865	3.70033	3.94139	4.75516	7.04014	5.71863	6.02141	5.87536	5.87367	4.45335	5.34317	4.09237	5.09709	6.47845	5.99907	5.97311	4.8278	5.14331	3.80129	5.57102	6.2113	5.08973	4.94714	5.66526	4.85549	6.12602	5.49337	5.78674	5.74687	5.02438	4.02511	6.11007	6.78932	5.33864	5.25204	4.63974	7.38909	5.92333
CD69	4.23267	6.13891	5.81766	5.49408	4.62363	6.41319	4.64396	7.40912	8.06919	6.47788	6.94289	8.13416	3.79191	7.04178	5.90537	8.05091	6.56799	7.24087	6.52304	7.96684	5.1401	7.64689	3.58216	5.20424	6.57748	7.7931	7.26434	7.70473	7.62886	5.28985	6.14645	6.1656	5.35774	5.38968	5.10619	5.70164	7.31053	6.26632	6.24622	7.01113	7.51929	7.61016	5.84172	7.59556	5.27664	4.95837	6.17832	7.33203	7.13285
CCR6	3.57808	3.55928	3.97946	4.67802	6.13637	7.76639	5.70018	4.43002	3.98717	3.79551	6.25699	3.84748	3.34774	3.38617	4.28387	4.34029	3.79213	5.19836	4.14103	5.84708	5.08106	3.91591	3.83172	3.48482	4.04402	3.86049	3.97268	3.797	4.02489	3.61304	5.20192	3.97226	6.83583	3.51246	3.86006	3.63307	4.11851	3.81356	4.48177	4.06141	3.85687	4.80066	3.66277	4.56294	3.84469	5.45172	3.48927	3.772	3.86974
THEMIS	3.3406	5.02428	3.9399	4.04894	3.57311	4.66557	3.60862	5.06858	4.67163	3.89172	4.71934	5.66976	3.16051	3.34239	4.58437	4.64016	3.66396	4.32276	3.81116	5.01098	3.54011	4.80066	3.27764	3.69751	4.0317	3.84556	5.68854	3.94513	4.59957	3.51842	4.33322	3.73063	3.42774	3.44891	3.55326	3.58585	4.55253	3.61085	4.65784	4.47626	3.94301	5.33976	3.48081	6.55383	3.63167	3.67213	4.16698	5.87299	5.06623
CXCL10	7.09256	10.1271	7.15401	6.32581	6.76663	8.00955	8.65509	8.74309	8.52575	6.66995	7.30833	11.5805	8.67198	5.00662	6.59632	9.09512	6.99285	7.82989	8.23422	8.47606	5.92865	9.92935	6.68158	6.11629	7.04407	9.05833	11.2107	8.24433	9.57867	4.68414	8.26555	6.55353	7.66972	7.89614	8.65265	7.68432	8.80231	7.91625	8.29873	8.76094	7.09187	8.5764	9.02025	11.217	7.7998	6.71232	9.52602	10.9338	9.80819
MXRA5	6.26864	11.4721	9.23286	10.5333	8.40192	6.40271	5.43817	11.3274	10.3616	7.66108	5.4155	8.30366	6.30912	10.5297	6.20065	6.94479	6.04262	7.96311	5.78334	7.6007	9.13952	7.63057	6.32532	7.01825	9.26711	6.36975	6.67722	7.59395	8.36652	9.22825	7.92797	7.09119	6.74486	7.23521	8.09394	8.99295	8.72764	6.00156	8.08294	6.84632	9.01731	6.92058	5.56492	6.02883	12.2139	8.36836	10.1663	6.59367	5.75855
APOD	6.26271	6.36923	4.94864	5.79824	6.1066	5.88875	5.85319	5.13557	6.53548	5.8916	5.27577	6.75236	4.96758	5.34183	5.16161	4.66415	5.23639	6.31097	5.11831	5.82049	5.6733	5.30512	5.09796	5.55419	7.92645	7.11571	4.70065	6.03277	6.9101	5.11946	6.39146	7.7227	5.2232	8.20937	8.03617	7.69276	9.5413	7.61822	7.55846	6.1742	9.36383	5.53991	6.67312	4.96307	9.38586	6.14364	5.67304	5.10728	5.49177
NEGR1	3.6801	4.55215	4.30972	3.44141	4.73151	4.1066	3.65497	3.49009	3.62342	3.92148	3.4149	4.77	3.47206	3.50854	5.36147	3.89536	3.53424	4.95243	3.59394	3.46546	3.42914	3.35495	4.69369	3.70315	4.23161	3.6094	3.39864	5.02928	3.53016	3.45025	5.65319	5.32573	5.48542	5.11148	5.11436	4.9493	5.64382	5.22875	3.50493	5.63289	5.14289	3.49566	3.42828	3.34624	3.4954	3.52284	3.40742	3.36749	3.47869
SOX7	6.77301	5.30647	4.98752	5.62447	5.84612	5.93278	5.2471	5.34407	7.39799	5.94746	3.98823	6.25301	4.32687	3.93196	4.97715	4.65494	4.23225	6.52547	5.083	5.32209	5.63174	5.81953	4.59441	4.46439	6.7509	5.55227	4.63066	5.82994	4.91136	3.73562	7.62132	7.89614	5.11811	5.20403	6.76072	6.0899	8.3639	6.69369	5.86348	5.59772	5.50805	4.67579	6.50161	5.0017	5.95652	5.19198	4.78359	4.41687	5.5071
CTTNBP2	4.60234	4.90943	4.51592	7.11641	5.93179	4.92708	6.48902	7.48719	5.85069	6.02713	5.0129	5.84802	6.97151	5.72048	5.97064	5.57361	6.15845	6.84515	4.69919	4.22537	5.94332	5.88968	6.17071	8.32603	6.72238	5.45293	5.29659	7.02286	4.22537	6.46472	4.79526	6.3748	8.13953	6.8619	4.32898	5.74897	5.32978	6.22007	6.0688	7.09634	5.78118	3.9034	5.89258	5.6345	3.55404	6.72683	6.36896	6.48041	4.92858
HLF	6.50872	4.57037	4.05844	5.77828	5.80736	6.98361	6.02835	3.88585	4.66045	6.8276	4.67802	6.74236	4.80024	8.43596	6.78081	6.05279	4.04149	6.98836	4.74148	5.3105	7.05313	5.60411	7.51892	6.9896	6.06665	6.843	5.20148	7.00808	5.23345	7.93703	6.02466	5.71911	7.65718	7.01984	5.86701	6.93449	5.897	7.54876	5.61379	6.45323	5.83911	3.80176	7.37349	4.09418	3.88166	5.63612	6.4478	7.31507	7.46753
DPY19L2P2	7.15027	4.48698	6.22677	5.63035	6.61142	6.08687	5.45894	5.34632	6.68277	6.51433	3.874	6.9085	6.76758	6.81856	7.9674	6.54712	3.31027	7.09052	5.45987	5.05163	6.51661	5.77781	6.84877	4.76211	8.08017	7.5813	6.81451	6.8106	4.8601	7.13078	6.71567	6.68895	4.77058	6.79475	4.6263	6.27773	6.33781	7.21826	6.33378	7.55248	4.56751	6.53602	7.07695	5.69923	4.23876	6.1985	4.15223	5.36478	6.19393
PCDHB14	8.25392	6.40813	6.83034	6.01738	5.10329	6.37721	4.80651	4.81592	5.8766	5.84295	5.37221	6.09353	3.32801	4.78959	7.30795	7.06247	5.68733	6.40919	4.37362	5.68921	6.39229	4.56272	5.56704	4.45877	6.80466	6.43815	6.35416	6.64217	5.62121	5.04285	6.53329	6.63728	4.33016	6.71567	4.38224	4.72124	6.98263	5.99108	6.12192	7.32945	5.54916	5.51803	6.21955	4.24154	5.63709	5.7742	5.46194	8.16758	6.03749
SPAG1	5.66526	5.01015	4.80588	5.4624	5.78796	5.64191	4.5607	5.06752	5.80211	6.62034	6.58677	6.79968	4.8092	4.43536	7.12269	6.45293	6.78411	6.5078	5.90831	4.12679	6.08914	5.44086	5.84923	3.97991	6.12751	6.53939	6.66995	6.00181	6.20511	6.30888	6.7932	6.25699	8.06268	5.70422	5.26586	6.42007	6.01904	6.61316	7.59599	6.35634	5.8307	4.88459	6.54597	6.20587	4.37804	6.06029	4.71311	7.34359	5.98736
NCAPG	3.71776	6.55808	6.74453	4.24415	5.20236	4.65864	4.1702	5.4904	5.10553	4.8901	5.29326	4.98126	4.23328	3.80724	5.35002	5.36179	5.08671	4.59256	6.30964	5.33542	4.31712	5.37804	5.57146	3.76357	4.76548	4.1171	6.90407	4.34237	5.80522	3.83661	4.1924	3.74761	4.68972	4.102	4.29882	3.6152	4.2059	4.12457	5.97581	4.40583	4.92352	7.5328	4.15799	7.46829	6.50897	5.40941	3.94785	4.84228	4.17324
GAD1	3.86806	5.42764	3.97436	4.08447	6.64964	4.60193	5.64736	3.88357	4.43146	3.95529	4.98083	3.75635	6.38589	5.12945	3.8145	3.98179	5.78167	5.35888	7.56827	5.77735	4.99632	4.52867	5.62169	3.9559	5.23639	3.92485	5.41842	4.59235	4.15346	3.83594	4.13193	3.9172	3.94576	4.20707	4.21296	5.67809	5.20403	3.85902	5.96579	4.34426	4.50808	3.86826	3.95509	3.81883	4.40017	7.27048	3.78994	3.99684	3.7801
IFNG	4.12697	6.35389	4.21861	3.84031	3.97969	3.99638	3.88866	5.65342	4.38203	3.93095	4.79882	5.80858	3.81797	3.97991	4.1024	5.18977	4.68725	3.99348	4.49452	4.3879	3.88397	4.69898	3.73705	3.78724	4.17989	3.98739	6.48124	4.02142	5.81456	3.91547	4.1504	3.75008	3.75186	3.83507	3.97567	3.79529	4.15463	3.86194	4.71396	4.44326	3.58978	7.75075	3.86678	7.81451	4.07482	3.99494	4.36252	7.56577	5.36524
UPK1B	4.38282	4.86538	4.34341	4.17467	6.23138	6.17523	5.19709	5.39862	4.22008	5.14331	4.82448	4.26076	4.29014	4.16362	3.96471	4.59132	4.47424	4.85336	4.2083	3.90971	5.24368	4.49639	4.05323	4.37521	4.07917	3.99535	5.60192	4.47366	4.64396	7.04178	4.15264	4.06548	6.99614	5.11701	4.38263	4.96307	3.97126	4.10075	6.00063	3.92251	7.6973	4.21033	5.61334	4.09237	4.07767	4.27689	4.1076	4.28251	4.7311
RAD54B	4.76754	5.17594	5.50615	6.48011	8.28554	7.359	5.8776	4.63811	5.53525	5.51734	8.64817	5.21109	4.81944	4.40989	6.53575	7.18391	5.95903	7.77091	7.89873	6.71685	6.46747	6.48902	7.73746	6.6413	6.63961	5.20424	6.40538	6.08711	7.05616	5.62825	6.62034	5.51879	10.3726	6.45846	4.73774	5.58357	5.10728	5.11017	6.90407	7.14091	6.68074	8.9159	5.10262	6.63588	5.51201	7.06719	5.6674	6.45214	6.14645
SPX	6.04239	5.35844	5.04992	4.30087	7.14411	5.11946	8.11554	4.66291	4.64579	7.64859	4.74211	6.77902	7.57245	5.25776	7.13078	7.34051	7.05616	6.41457	4.69515	4.56418	4.4237	5.15298	7.77423	10.9519	5.23571	7.04729	6.97601	6.62266	6.86373	8.15901	6.17368	6.03057	9.88958	6.89048	6.90093	7.76596	5.05517	6.63265	6.59105	6.99451	5.05271	4.59726	8.58447	5.10396	4.7292	4.88588	9.00297	7.31733	6.89644
KIF14	3.59822	5.0469	6.44998	3.86071	4.54278	4.18228	3.73606	4.75153	4.44387	4.21417	5.4148	4.57736	3.8848	3.59772	4.68274	4.45532	5.22362	4.38977	6.53213	4.27171	4.30454	4.26342	4.98619	3.58658	4.50565	4.08243	6.1351	3.82698	5.00506	3.50493	3.96993	3.77265	3.91787	3.55349	3.56462	3.489	4.21093	3.86974	5.51037	4.1983	4.12697	6.75659	3.94075	6.16457	5.11458	6.10502	3.96866	4.44696	4.14959
COL5A1	6.45379	11.1479	10.3045	8.23114	7.34084	7.79123	6.77362	8.56572	9.3333	6.43926	7.5169	7.00044	5.87249	5.0327	5.63265	6.00729	7.95535	7.11137	8.14284	7.87376	7.58917	7.07093	6.9082	5.00458	8.81585	7.30478	6.38298	7.12343	8.89961	5.65739	8.08857	7.20882	5.87227	6.37262	8.85143	6.60202	9.29546	6.9101	8.99494	7.0538	9.60904	9.20463	5.59606	7.96575	11.3408	7.62661	4.96524	5.02736	5.7298
FAP	5.26907	6.33491	7.39762	7.47751	5.9492	6.72952	5.66173	7.67753	7.08569	5.55205	4.99223	5.9113	4.70152	4.52556	4.79804	5.30783	6.13353	6.11255	6.57305	5.91995	6.42777	5.29791	5.87929	4.39139	7.21356	6.11156	5.42163	6.05638	6.47736	4.24135	6.5966	6.41651	5.02278	5.52335	7.13685	5.05226	7.76996	5.68733	7.29977	5.59161	6.89326	5.52177	4.77693	5.45941	8.74943	6.05307	4.77456	4.55863	4.82859
TMEM119	4.28233	4.52535	6.01855	5.46455	4.78478	6.40432	5.59491	6.50841	7.42821	4.98509	4.56353	5.47642	4.63542	4.66396	4.53023	4.85162	4.52037	4.83577	4.59359	6.66906	4.75325	4.91586	4.9495	5.05226	6.32452	4.89055	4.90266	5.76424	5.30382	4.48721	5.38258	5.70352	4.34237	5.08214	5.73534	5.07506	6.89518	5.0592	6.38775	4.90414	7.8659	4.32237	4.6476	5.35701	7.69424	5.66716	4.62237	4.82673	4.78645
LINC01268	5.16541	3.68503	3.9493	5.8921	6.81886	6.24795	4.4654	4.7556	6.02737	5.98567	7.15781	6.90376	3.80418	3.99287	8.11615	6.61751	4.83787	6.17095	4.58337	6.43591	5.50615	6.60555	5.26701	4.76169	5.58951	5.73026	5.21994	6.10805	7.06821	8.21111	6.62833	5.2874	4.67395	5.40736	4.29212	4.85616	6.12956	6.37943	5.29028	6.96635	6.98131	5.87179	5.31692	5.73462	4.0855	5.93105	4.80192	6.95375	7.12695
LRIG3	7.20882	5.2355	4.5568	7.52881	8.11554	6.75689	5.07227	5.79346	6.78932	6.20736	4.74436	6.59252	4.17428	4.22537	7.1624	7.26216	3.99472	7.5328	4.84465	5.20105	7.40338	5.51316	6.49454	7.07899	6.79086	6.05538	4.89526	6.5225	5.67375	4.54843	6.28138	5.59606	7.0803	7.75216	4.23448	5.81095	6.21181	6.87026	4.87027	7.05205	5.75661	3.66396	5.84295	5.03772	6.80494	6.37531	6.09653	4.26461	6.49567
HOGA1	6.72147	5.51084	7.23048	5.0727	7.02444	6.79174	6.89995	5.64663	7.20666	7.35603	5.14905	6.93196	4.56935	9.27438	6.63557	8.74533	7.84408	7.11473	5.37896	6.51205	4.89438	8.76094	6.64476	8.18238	7.83078	6.53213	7.86442	8.92152	6.44291	9.08977	5.80375	6.90123	8.155	7.96417	5.47849	8.56572	5.58012	7.13893	6.73072	7.14959	6.45739	6.22134	9.04798	4.90624	3.87485	8.39921	9.46619	9.00576	9.639
NEB	3.57856	3.51557	5.02215	4.82536	5.57642	4.45917	3.93825	4.47443	3.98118	3.80923	8.96989	4.12965	3.88058	3.83086	5.2573	5.19376	6.53047	4.27233	6.1778	4.20292	4.53201	4.40139	4.42638	3.65688	4.21759	3.64947	4.18549	4.36592	4.0526	4.89245	4.30047	4.12986	5.73986	3.97393	3.74556	4.30028	3.94425	3.95361	3.91055	4.13173	4.31593	8.24909	3.79172	4.37762	4.30334	6.01663	3.65376	4.42555	4.87211
LIX1	3.38992	3.30243	3.78166	3.23846	3.31612	3.90128	3.47471	3.23429	4.93569	3.23006	3.40228	5.24801	3.597	4.58808	4.97152	4.1498	3.28088	3.25572	3.32675	3.39918	3.2141	4.03634	3.72928	3.81928	3.64516	5.10153	3.28618	4.20627	3.30782	3.81028	3.34328	4.87355	3.58608	4.43435	3.45769	6.79024	3.59394	5.53724	3.38879	4.40642	4.62507	3.33132	3.44471	3.4152	3.25741	3.24845	4.84525	3.47606	3.33787
LOXL1-AS1	4.24554	7.65673	6.99649	6.27693	6.4051	4.37298	4.93096	4.70359	4.74837	3.46546	3.43669	5.07421	4.08306	3.54678	3.17659	4.17788	5.02322	5.83833	5.85787	3.9491	5.73363	4.42148	4.97692	6.71828	5.33139	5.69225	6.86373	5.25549	4.48678	5.79872	3.73679	5.4466	6.02416	5.49808	3.46163	6.39704	4.31652	3.82804	5.53267	4.74047	4.71875	5.20468	3.18326	5.00685	4.69941	4.68213	5.58811	4.83392	5.02105
BHMT	10.1882	7.66577	6.89015	9.55973	11.3821	11.8601	10.6037	9.26188	8.63848	11.8981	7.91327	10.6602	5.83809	6.838	11.301	10.8373	5.85044	10.8549	5.91545	10.6897	8.22994	10.5049	9.47917	9.41681	9.51701	10.6073	6.78809	10.7015	9.16957	6.59105	11.1154	9.42569	7.91985	12.0131	10.6681	9.55377	9.58029	11.4111	9.54753	9.89168	8.90057	5.48871	10.7553	6.9059	4.58276	10.6002	7.41141	8.69135	11.6362
LOC102724689	3.76336	3.31939	4.8486	5.29481	3.5106	3.78416	3.48639	3.47552	5.37462	5.06925	4.59111	4.9601	3.62292	4.13028	3.69218	3.8405	3.89087	5.26361	5.37331	3.93136	3.61133	3.59168	3.42774	5.08973	5.06881	4.95882	4.8138	3.68459	5.42722	4.97173	3.61614	4.52722	5.8697	5.30271	3.81531	3.82219	3.85709	4.80794	4.63482	4.10016	3.71895	3.60402	3.44443	5.26073	3.77265	4.7509	4.75173	4.40826	3.69447
ACSM3	5.76829	4.16124	6.53467	4.05648	7.71765	5.25429	5.97844	6.42486	5.82664	7.10782	6.17575	7.10543	6.12602	6.65222	6.68686	6.93326	6.12852	5.97334	5.04243	4.6677	5.10108	4.49268	7.86976	10.4804	6.3488	5.62069	6.19393	6.85593	5.04349	7.10676	4.89635	5.38579	8.60349	7.47828	4.97671	7.24339	5.95652	7.60419	4.47074	6.29208	4.89416	5.31167	5.99932	4.22935	3.75233	7.01664	8.85575	6.40159	7.58959
FBLN5	5.83184	6.50727	8.66208	6.73615	7.46561	8.97176	8.20463	7.10814	5.72145	6.89965	7.19704	7.8818	7.04211	6.38	5.07805	6.17095	6.53683	7.53777	7.0756	7.67236	5.99636	6.60721	7.73111	7.12303	8.38438	7.6758	5.21554	9.77866	6.73882	8.45638	8.35362	9.19308	4.88691	8.69209	8.39159	10.3752	9.73566	7.67198	8.75518	7.668	10.9855	5.90608	6.43235	5.80568	7.77329	7.79931	7.40797	6.19393	6.79259
SLC7A9	8.56351	5.02516	4.93991	8.44687	7.85329	9.17175	8.10513	5.7573	5.79993	8.32476	5.91517	7.86487	4.9279	5.35514	8.83411	8.0472	5.22875	8.14629	5.15079	8.11492	6.34831	7.53081	7.51564	5.13116	6.09502	6.87915	5.89038	8.44756	8.35612	7.06348	8.50367	7.62088	7.40607	9.36657	6.62409	6.53602	6.65136	9.40576	6.35972	8.37225	6.71595	8.3935	8.61963	5.8224	5.17239	6.61551	4.81254	9.57061	8.9804
MOCOS	3.842	6.45517	6.67374	5.69779	5.76784	4.12318	3.99725	5.57595	5.44947	3.79284	6.45407	3.92746	4.06161	4.56376	4.26566	4.69369	6.99879	4.27069	6.85686	5.82687	5.93376	4.33322	4.3019	6.03774	4.67375	5.19332	6.16329	4.40321	5.21973	4.02643	4.20232	4.35631	6.23826	4.05426	4.00953	4.67247	4.52967	3.94824	6.05128	3.93845	4.88966	7.20811	4.2745	6.24928	5.74945	5.87708	4.68334	6.0572	4.1851
LRRN4CL	4.66436	5.22013	4.63088	4.30653	5.7985	5.58668	4.7419	5.66954	5.10174	4.2079	5.25986	4.52599	4.41826	4.43208	4.32418	5.91847	6.33142	4.90081	5.23367	4.76275	5.95184	4.68746	4.29033	6.76126	4.29114	5.39016	4.68846	3.95424	4.37444	4.36008	5.57619	4.16146	4.15761	5.87367	4.00205	4.43352	4.9903	4.41986	5.26656	4.12942	6.55189	4.01136	4.13276	4.65926	4.85249	5.40689	9.60734	5.30848	4.40341
ERP27	5.528	6.14017	5.90561	7.52713	5.37691	6.11756	12.3231	5.47872	5.81317	5.80833	5.12267	6.26245	13.0847	5.41323	5.46285	6.03603	5.1499	5.66149	5.38901	6.30383	5.48565	6.32869	6.60975	6.67874	5.92451	6.39704	5.64736	7.74705	6.95145	6.63321	5.83569	5.50381	6.35634	7.24485	5.04071	9.07822	5.81456	5.53772	5.25594	5.5456	9.34396	5.09904	5.29392	6.01714	4.5145	5.50201	6.82476	6.09269	5.81317
AMIGO2	7.13113	8.97943	7.94558	8.37998	7.69052	8.12242	9.79147	8.0264	8.41749	6.87056	8.48848	7.6973	9.78608	6.07107	6.95594	7.73789	8.4156	8.08568	8.22635	8.07171	7.56913	8.00536	5.87367	5.47551	8.60207	6.59968	9.68792	8.67442	9.02937	5.56563	8.22578	6.97307	5.61168	6.82292	6.98032	8.01335	7.89824	6.5044	8.10349	7.39953	9.32813	12.3231	6.46498	8.86818	6.13429	8.34684	11.3274	7.79171	6.93573
C19orf33	6.61551	9.55377	8.36199	8.98317	9.6258	9.17859	7.94767	8.24552	6.43318	9.26316	7.13585	7.43094	5.03687	5.00637	10.7475	9.68942	9.71972	9.34804	9.8532	10.5932	9.10448	10.9294	8.87338	4.50606	8.9679	6.3322	9.29892	8.86211	10.5297	10.1198	7.49875	7.85329	9.31509	8.65588	9.34943	7.00775	8.5693	7.98998	10.4772	10.3501	8.76335	11.04	10.628	10.1105	4.89739	10.7051	4.48217	10.1512	8.99991
HSD17B2	3.82936	3.97083	3.64112	7.75539	6.01591	5.09596	4.46827	4.29603	4.72684	5.30296	4.06239	4.39534	4.00226	3.90212	5.1953	4.07093	4.66877	4.02941	4.13193	4.06042	8.18826	3.92022	4.97996	6.3309	6.17313	6.62382	5.58407	4.01014	4.17304	4.4046	4.92835	3.56691	7.36517	4.80876	5.01462	6.34907	4.57264	5.53967	3.93196	4.5753	6.70815	3.79484	5.26385	3.88038	3.99574	4.24356	7.08269	3.98592	4.76796
PHYHIPL	7.73519	4.79882	4.78999	6.24005	6.74236	6.13938	5.29028	4.38854	5.20729	7.78022	5.02041	7.08983	5.02428	6.15588	7.523	5.98042	4.6507	5.59539	4.81069	5.40488	6.11932	5.5902	7.36133	9.07714	6.26966	6.48959	5.72307	6.38483	6.28677	9.0675	6.12088	5.86138	8.17538	7.02808	5.32464	7.73701	6.37238	7.05242	5.24953	6.64818	5.03057	4.30932	8.59704	4.62673	4.90536	5.51646	8.60489	6.86343	7.93949
HTRA4	4.48762	6.00628	4.49555	5.47351	5.2791	5.10262	4.63602	5.00437	4.73488	5.22341	5.00614	4.33117	5.2874	4.49515	4.74564	5.64382	5.06668	4.68001	4.28893	4.30129	5.26249	7.51442	4.16678	4.12416	6.12703	4.27171	5.44243	4.04894	7.52713	7.58006	4.41885	4.09398	4.60708	4.0033	4.04443	3.76043	6.50872	4.25498	5.19667	5.16207	4.43962	6.39918	4.52477	7.4376	4.49639	4.94224	4.45491	4.90496	5.42093
LOC100288152	6.42834	5.79704	6.63644	6.11857	6.50327	8.1001	7.17223	6.71297	6.99154	5.58907	6.95531	6.48849	6.0296	6.25353	9.19881	6.00181	6.42328	6.81421	6.06399	5.54439	5.84418	8.07963	6.10231	4.57592	7.25622	8.52367	5.74059	7.4076	10.0446	8.06978	8.66208	6.3558	5.69392	9.56293	10.1008	6.47436	5.84006	8.55913	5.85903	9.10666	8.77804	6.95375	7.1259	5.49808	6.71623	6.0876	6.82972	6.17552	6.3208
LINC00622	5.31119	3.38787	5.15855	4.05365	5.02322	5.06881	3.89281	4.83872	5.94008	6.67665	5.98711	5.44383	3.47682	5.16297	6.62008	4.67541	3.76088	5.11148	4.01975	4.16899	4.46482	4.05448	4.91733	6.07302	6.40349	5.76974	3.66863	5.14595	4.06042	5.62331	5.11062	4.64681	3.42967	5.74131	3.59145	4.29984	5.80424	5.46826	4.17724	5.51201	4.2035	4.62797	5.26361	4.58768	7.48683	4.07957	5.28647	3.40681	5.58482
CDC42EP5	7.49796	6.1832	6.7663	6.08539	6.54023	6.68715	5.97821	6.15482	8.07742	6.94671	5.30985	7.05716	4.24435	4.73902	6.50953	5.96	6.19799	7.14928	6.21544	7.69189	6.97837	7.91625	5.67024	4.6727	8.11894	6.69572	4.97067	6.69922	5.96479	5.7164	7.46359	7.43483	7.75261	6.63469	7.70517	6.98098	8.94288	7.44202	7.04112	7.28702	8.85057	8.48086	6.46635	5.78095	8.11956	6.57278	4.76588	5.85021	6.92546
PRTFDC1	8.03939	6.00132	8.66592	6.37452	7.31129	6.85818	6.79115	6.44809	6.65162	6.12751	4.8478	6.92381	7.2987	6.73009	6.24516	6.29685	4.30574	6.73245	5.60461	5.70352	7.69505	6.71421	7.29097	6.83184	6.9389	6.33113	6.78746	6.08785	4.95011	5.39907	6.07995	6.06653	3.64656	6.0822	4.57699	6.43156	6.89229	5.9113	6.05382	4.3369	7.2946	7.18248	6.11304	6.60381	6.95594	5.73674	7.29274	4.93569	4.95837
RP11-373D23.2	4.77652	6.22573	6.02268	4.81193	4.7604	5.85173	4.97692	6.94165	7.54919	5.90704	7.76371	6.00307	4.24195	5.11062	5.37528	5.48034	6.24698	5.16714	6.09219	5.4676	6.29156	6.48652	5.56563	5.17325	6.92989	5.63829	5.94822	5.52776	7.58089	4.57221	6.8785	6.81484	6.48763	5.38835	7.22478	6.83552	4.94184	5.77233	6.12628	7.29604	6.88922	6.58199	5.46619	5.88682	7.82413	6.08914	6.75778	4.83621	5.4148
TNC	4.98901	7.0756	6.31969	5.70725	4.79125	6.14544	5.21351	7.05716	5.71932	4.93142	5.27044	5.96795	4.65218	5.86726	4.27489	4.72331	5.42438	5.26073	6.88293	6.00255	5.78049	5.16888	5.59419	7.57289	6.61228	7.78222	6.17678	6.84021	6.46065	6.26915	5.78747	6.98131	4.68128	5.47987	4.46665	8.16015	8.25766	4.99957	6.54957	5.61265	7.6395	4.97935	6.77607	6.09826	4.93843	5.26163	4.0622	4.46624	4.65556
ADRA2A	4.44654	4.46381	4.30795	4.25683	4.3768	6.28371	5.21109	5.6029	4.05215	4.70152	4.29525	5.40465	4.33599	4.50485	4.39236	3.96471	4.20467	4.55433	4.47135	6.88138	4.91991	4.17928	4.47033	4.85723	4.71627	5.45427	3.85795	5.03335	5.30557	3.96825	4.6017	6.5988	6.15845	5.11107	4.5991	4.97524	6.34055	4.60501	5.77347	4.17488	6.39541	4.38102	4.21663	4.01367	4.98944	5.26385	4.39534	5.76181	4.19363
EFEMP1	5.80833	8.20345	7.01013	7.23589	7.48429	7.58753	6.96572	8.02208	7.52633	5.69946	5.85495	6.65664	4.77477	5.42303	4.59213	6.84332	6.19294	6.97084	8.14687	7.508	7.31129	5.6407	6.15026	6.96255	7.8402	7.99091	6.13966	6.71653	6.45132	4.3353	7.13993	7.12089	6.81032	6.0033	8.15146	7.02978	7.60284	5.99205	7.19704	6.91418	8.28806	8.00107	4.72661	5.83161	7.74752	6.83361	6.92186	4.98083	5.16475
C4orf6	3.5525	3.66887	3.95992	4.88567	4.83328	5.01738	4.28775	4.51994	4.67824	4.7731	4.09072	4.63665	3.53626	3.62531	3.74374	5.17977	3.73384	4.45691	3.91075	6.13734	4.40562	5.38879	4.06404	3.51683	3.78213	6.30683	5.02667	5.06602	3.6841	3.90757	5.08628	3.83355	6.32265	5.11501	4.5274	3.44944	4.12535	3.98529	5.77302	3.92272	3.98697	3.69334	4.62507	4.134	3.3519	3.73606	3.50072	3.5192	5.40941
DQ592442	6.58651	4.85445	5.10484	6.33009	7.92746	5.97529	6.12751	5.87638	5.44682	5.57572	5.98418	5.15319	5.98784	6.598	4.76568	5.80663	6.01024	7.38342	5.39568	4.77585	6.63237	6.25671	6.55353	7.14753	4.74564	5.08951	7.3366	5.0783	5.21089	6.36412	4.70484	6.00006	5.19442	5.59513	5.97581	5.56633	6.50327	4.59564	6.34592	6.30094	7.4876	7.80831	6.67192	5.09223	5.37619	6.82697	7.10033	4.48278	4.75957
ADIRF	9.69802	7.17783	8.26976	8.88832	9.96087	9.45228	8.48221	6.52224	9.25327	11.9388	7.01791	11.3821	6.52964	11.2233	11.5723	9.77497	6.39458	10.5566	5.44523	10.2797	8.71981	10.7835	9.39885	5.99408	10.3237	9.71274	7.05313	10.9519	11.1755	9.54753	9.75324	10.8673	5.97995	11.0247	11.0937	9.43993	10.4375	10.9804	9.33201	9.92085	11.2753	5.81953	11.9235	9.73028	5.1737	8.51007	7.21534	11.3345	11.0937
SLC17A4	5.83207	3.97946	3.8105	7.34955	5.58012	6.96255	6.12246	3.93196	4.2083	6.60351	4.00995	6.50271	3.85027	4.24394	6.83614	4.70903	4.04212	5.78605	3.9645	5.12032	6.40132	5.69033	5.64879	3.92528	4.00001	4.28855	3.83065	6.18648	4.11056	5.06474	6.52661	4.22129	4.23814	5.22296	5.10108	3.80985	5.41912	5.4166	3.79284	6.53712	3.8213	3.87995	4.81631	4.74006	3.72007	3.75436	4.67943	3.85603	4.99873
LOC100134445	7.09563	6.68481	6.26812	6.78114	6.42191	7.67753	7.14787	6.87026	6.67251	7.5496	6.63673	5.43972	8.19352	6.96065	8.61678	7.37692	5.79777	7.00808	5.54219	5.73868	7.90933	8.56851	6.65634	6.32764	5.65175	5.67855	6.27171	6.82411	7.24155	7.34437	5.95555	5.57479	5.13919	5.82406	6.84575	6.13377	5.61748	5.28924	6.68715	7.28144	6.99807	7.55337	6.07674	6.91355	8.11439	6.08321	6.03526	6.79812	6.64158
LINC01094	4.36634	6.19367	6.10179	5.9558	5.93693	5.26007	4.37721	7.42393	6.75324	5.73485	7.10341	5.42697	3.87058	4.47116	5.57896	6.58228	6.28916	5.7657	6.90062	6.37136	5.16485	4.75851	5.15255	5.87536	6.63321	6.95339	7.11169	4.44124	5.05832	4.6174	4.80405	4.80107	5.18445	4.4329	4.38612	3.54011	6.55983	5.25047	5.59137	5.53079	4.6654	5.13488	5.0469	6.79203	6.6946	6.24463	4.33342	6.39704	6.05056
RBP7	10.5404	6.4116	6.95832	6.82069	8.61531	8.26373	7.8003	7.97836	8.41816	10.0069	7.18212	9.28553	7.1393	7.53652	9.8357	7.48033	6.68452	10.0469	6.81856	8.25581	7.0618	9.38586	6.65486	6.54199	9.46208	6.7663	6.50161	9.11116	7.92852	6.49067	8.9989	9.31638	5.92794	8.40254	9.21631	7.97515	8.21279	9.80291	6.88048	9.67269	6.92415	6.52332	9.69283	5.89871	5.73219	7.56448	7.19527	6.56738	8.21883
POU4F1	3.97313	3.66723	3.56309	7.06619	3.63552	3.52023	3.51635	3.64064	3.54185	3.57932	3.68106	3.70055	3.63867	3.73338	3.70337	3.75475	3.52023	4.38488	3.61013	3.77085	6.64703	3.55429	3.6011	3.71873	3.74486	3.50125	3.78677	3.58033	3.5912	3.64994	4.0293	3.58435	3.60035	3.55728	3.59269	3.59024	3.58978	3.65172	3.74603	3.8029	3.60648	3.72215	3.66323	3.81576	3.72328	3.65859	3.76741	3.50388	3.62095
SYT13	7.40338	5.19198	9.26456	6.92381	7.78022	6.48428	8.02964	7.98199	7.45151	6.29549	6.42328	6.40297	8.56131	6.96831	5.86726	7.25113	4.82655	7.7628	9.36383	7.46522	8.11554	6.57498	6.04386	4.40562	5.42722	7.29682	8.68524	6.55326	8.1309	7.28363	5.84441	6.85686	8.78469	4.94908	7.10852	6.28421	6.96799	5.75377	8.09893	6.79906	6.64046	5.4139	7.41104	8.33291	4.45192	8.167	5.95068	6.54712	5.3423
KLHL13	7.40375	5.72934	6.78507	5.36091	5.38214	5.73002	7.70517	4.78439	6.05155	6.124	5.21554	6.16483	8.49048	9.75507	6.39625	5.94404	5.98159	5.51411	4.41072	5.35701	5.06231	6.04562	7.43599	8.70558	5.99108	5.5148	5.33474	6.83122	5.25385	6.24463	6.39433	5.38646	7.76954	7.51238	4.15903	8.33803	5.66691	6.35895	5.18775	5.754	6.69744	4.09603	5.50852	6.1078	3.66396	4.95421	7.79599	6.24239	5.77324
LPL	6.95627	4.80896	6.40297	8.29811	6.87564	6.93639	6.35252	6.14493	7.10142	8.96125	7.63183	7.06857	5.08427	7.51277	7.07494	6.39678	6.00036	7.17187	5.53919	6.09677	6.14117	6.75983	5.49595	6.2385	8.39094	5.95677	5.16868	7.85759	7.38567	6.26657	8.61678	9.16726	5.45242	7.44281	7.5737	7.91031	8.19529	7.86537	5.38033	7.43013	4.98205	4.49331	6.78839	6.06252	9.11884	6.7433	8.66902	4.92948	6.42593
ZMAT4	4.72432	4.91136	4.76628	6.12373	6.20167	4.72017	4.69515	4.25827	4.64208	4.58583	4.74377	4.70109	4.48617	4.50928	7.97672	5.84344	4.74544	4.75601	4.87459	8.11276	6.1661	5.57458	4.68561	7.40338	4.84673	4.73338	4.94774	5.33792	4.81569	4.49966	4.58236	4.93863	4.78439	4.52885	5.11811	4.7528	4.64556	4.70741	4.53716	4.6943	4.68498	4.75516	7.34051	5.09288	5.03057	5.11148	5.22341	4.85529	8.45782
TMEM155	3.74894	5.47305	4.16601	3.78059	4.17507	4.19663	3.69892	5.38033	5.05537	4.30994	4.33988	5.68399	3.37091	3.51907	4.59029	4.59685	4.13069	4.29642	4.18311	5.56399	3.99452	4.82636	3.71124	3.54106	4.97955	3.89023	5.20105	4.59029	4.45314	3.50388	4.42514	3.98633	3.8105	4.29327	3.8182	4.08968	5.80327	4.3234	5.32733	5.33091	3.44443	5.96725	3.9468	7.31319	3.97415	4.03592	3.74145	6.77424	5.00708
FOLH1B	6.45739	4.83777	4.89503	7.76009	6.9389	6.48124	5.16141	6.82194	7.59475	6.12246	6.12602	6.03132	4.11749	4.21396	5.45849	5.30827	4.5578	6.35634	4.60623	5.91002	7.04211	5.02278	4.37195	6.76844	7.01178	6.71745	5.12506	4.9903	4.73549	4.17159	7.09119	5.59726	5.49177	6.26992	4.95748	4.6654	6.59687	6.34805	5.22945	6.04662	4.49595	5.54701	5.61426	6.16813	5.84098	6.93639	4.88794	4.31674	5.91916
AC024560.2	4.55294	5.01526	4.53374	5.6861	5.49177	4.401	4.84465	5.64044	5.27391	6.87815	4.79613	4.70925	4.76465	6.80673	7.14582	6.49903	5.42901	4.36135	4.71669	7.34203	7.03418	6.87249	5.90879	4.60401	4.47385	7.34697	5.43838	5.0144	6.32684	7.12089	8.95437	4.75685	4.69268	7.89274	7.08169	5.74467	4.62693	5.4148	5.75593	6.989	4.54396	4.42492	6.37562	4.94735	4.7173	4.53779	7.26799	4.92686	5.80833
RNF180	5.03162	3.38907	4.02901	4.03735	4.95923	6.51825	5.21069	3.69491	4.44797	4.76231	3.41233	5.66125	4.6906	4.89332	3.87147	4.11094	3.53626	6.30489	3.40144	4.62405	4.96955	4.74544	3.45	6.09703	4.89614	5.37595	3.42634	4.76465	4.02264	4.91007	5.29814	5.43817	3.40597	4.73732	3.49672	5.69995	6.00974	5.10197	4.53141	3.90673	4.58215	3.30113	3.63506	3.71963	3.33427	4.557	5.7365	3.31908	3.67518
SALL1	8.04563	5.17239	8.3704	7.42044	8.23293	8.22176	6.78081	6.62699	7.51729	7.97361	8.09893	8.9679	5.5588	8.77205	8.80573	7.86641	3.3307	9.23883	7.51929	7.41512	8.49943	7.09286	7.82316	8.45029	7.57539	8.08353	6.03301	8.07742	7.42541	7.11199	8.08294	8.29873	8.31624	9.62405	7.76508	9.03526	6.34701	8.52792	7.13827	8.64372	5.96989	6.91258	8.25581	6.23493	3.21961	8.32969	8.34615	7.81876	8.12924
MRC1	7.88672	9.78434	9.35724	8.42328	7.68515	9.55973	8.42258	8.28003	8.39796	7.43402	10.8207	8.0085	5.18088	7.17497	6.32951	6.33009	6.72979	8.61745	10.5082	8.90421	7.72132	6.43073	6.15077	6.6907	8.95437	9.02221	9.37629	8.43859	8.75352	5.58528	8.92993	10.1536	8.59191	8.0275	9.37495	8.86639	9.22116	6.81094	7.87427	7.39724	7.74844	6.31785	7.24189	10.5566	8.91024	8.58898	7.55419	4.26419	6.94076
HSPB6	5.04329	5.74373	5.53193	4.64985	4.68083	5.80066	5.77711	4.83006	4.94034	4.3353	4.81527	4.9961	5.07722	5.49223	4.36433	4.51243	5.65084	4.64821	5.79133	5.0418	4.99936	5.11655	4.93991	5.02624	5.04886	4.88212	4.49085	6.06527	5.46285	5.11767	4.99632	6.0842	4.83872	5.4773	6.10582	6.124	6.97338	5.20841	6.90093	5.54653	9.71093	4.95794	4.99373	4.73279	4.76316	5.60797	4.73424	4.53779	5.03057
CAPN6	3.39365	3.78547	4.80466	4.67782	6.58706	6.03966	5.02061	3.38759	3.52479	3.41089	5.44039	3.89577	3.76427	3.56742	3.82325	3.5989	4.40301	4.30834	5.85763	3.69679	4.75805	5.22502	3.56039	3.53887	3.54976	3.48586	3.51557	3.94385	4.38446	4.94369	3.39195	3.49089	4.98401	4.039	3.73176	5.36546	4.29402	3.50594	4.50184	3.44973	4.27727	5.47778	5.49852	3.6649	3.49036	5.50337	3.53193	6.31097	3.7767
SLC38A11	5.04772	4.11832	4.01615	4.90904	4.82426	4.75765	4.43941	6.30765	6.62064	5.3975	3.91764	5.62375	4.50728	3.96599	5.51574	4.11324	3.78458	6.90786	3.65688	4.2618	3.87232	4.48401	4.81822	8.44052	5.63881	4.39017	4.27272	5.49692	3.83964	5.02449	5.61074	5.02801	6.12602	5.528	5.00282	6.82161	4.35033	4.88481	4.19953	4.90164	4.04767	3.84622	5.22458	3.66045	4.37821	3.83355	7.05242	4.40017	4.39337
DPY19L2	5.77638	4.03288	5.41257	6.56477	6.62984	6.83646	6.55353	5.04669	6.21725	4.7902	5.29392	6.76044	8.03725	6.29441	6.03869	7.31544	4.32627	7.14859	4.30396	4.73732	6.98361	7.02382	6.09043	5.65739	6.71232	7.00171	4.53374	7.35714	5.06142	6.99912	7.20458	6.33599	4.36832	6.24876	5.92718	6.89229	6.57106	6.80729	4.60813	6.34429	7.4087	4.80192	6.1356	6.51941	4.8132	5.72763	6.54403	3.73942	3.98674
FCGBP	5.73289	5.19689	7.37007	5.32508	5.36546	6.91449	5.9839	7.90889	6.16023	5.67375	10.9069	6.36975	5.18332	6.01261	7.16549	6.49369	5.46574	6.24957	8.97084	8.40254	5.53843	5.92576	7.0689	5.37595	7.46944	8.05855	5.25882	5.83428	5.34912	7.91228	5.47417	6.43788	4.8092	5.55277	7.12089	8.39669	5.46803	5.33159	9.86906	6.22108	6.26735	5.2874	5.34183	6.28573	6.95865	8.12529	5.66029	5.64453	5.50223
LINC00619	3.41985	7.48471	7.53893	2.98607	3.02782	3.17144	3.05995	3.06794	3.28316	3.08873	3.09392	3.10835	3.11346	3.15416	3.3421	2.89038	2.9185	3.08926	3.24811	3.30875	3.70434	3.26744	3.00028	3.10241	3.34533	3.41205	3.18017	3.08087	2.91732	3.11733	3.06568	3.01787	3.20966	3.1853	2.95504	3.35434	3.28746	3.12943	3.38026	3.06329	3.36163	3.06103	3.10911	4.91777	3.11154	2.92944	3.20181	2.80527	3.12017
STEAP3	5.22103	6.91133	8.21639	6.64935	7.70687	5.51411	5.14351	8.34929	7.2234	4.99287	9.42856	4.94119	5.69618	5.74082	4.70885	6.00231	7.9034	5.87367	9.59611	6.19166	8.25392	5.24506	7.04833	5.73797	6.57833	8.65979	7.13756	5.32866	6.09243	6.00529	5.74155	5.79013	7.62795	4.96091	5.76205	5.26518	6.34781	4.84649	7.41736	6.57331	6.13637	8.46773	4.88063	7.09119	5.96099	9.08685	5.33404	6.19166	4.76
GSTT1	3.87696	5.87249	5.91395	6.25953	3.84685	7.35566	6.83489	6.06475	6.01336	7.28108	5.99611	6.36791	6.52743	7.49606	7.36406	6.6338	3.88058	7.93194	3.95013	4.14432	7.41436	5.98188	7.02547	7.08604	6.88358	6.39918	6.27483	6.40486	6.5391	6.29289	6.66622	6.95659	3.98739	6.42777	6.16711	6.83614	7.1372	7.14646	5.69104	6.37641	6.03377	6.13866	6.60138	5.74733	4.0744	5.926	7.049	4.3523	6.40703
POSTN	4.24934	7.05753	6.86525	7.21761	6.22082	5.65363	4.85679	7.28476	6.81032	5.66691	4.85076	5.89038	4.43637	3.97589	4.64841	5.16868	6.75596	6.35198	6.6839	6.0149	6.77786	5.87638	5.81027	3.75008	7.15727	6.55925	5.4655	6.02859	5.32643	3.93478	6.73821	6.59484	5.66691	5.07741	7.42893	4.13919	7.54587	5.94822	7.02217	6.4329	6.9925	5.52406	5.18751	5.34112	8.54581	6.3386	5.28924	3.93498	5.20038
MGC24103	3.40228	5.4664	6.57106	8.23293	7.64649	7.70819	6.80585	8.61311	6.70457	7.65021	9.31146	8.01776	6.41651	7.59599	8.60207	8.32118	7.92746	7.31619	7.99195	9.46345	7.55337	7.77423	7.10676	8.11109	8.48908	7.04112	6.8668	7.52881	6.19775	7.80978	8.40254	7.03217	8.31432	7.44668	5.93886	6.7406	7.32569	7.46074	7.99396	7.71809	8.16991	7.07793	6.6462	7.37613	8.55609	6.81637	8.08679	6.13254	6.31305
ROR2	3.44304	6.87343	4.2172	5.48081	4.9279	4.2035	3.94491	4.35752	5.03751	3.80356	3.82282	3.67565	3.43697	3.6956	3.8173	3.99243	3.71895	4.08243	5.95503	3.70171	5.44731	3.92229	3.65859	7.01533	5.12097	4.71543	3.64279	4.09215	3.68246	4.03551	3.79816	4.29903	5.69319	3.81202	3.83832	4.53182	4.96955	3.74669	4.69876	4.06741	5.76067	4.19162	3.79213	4.50262	6.79055	4.63025	6.20117	3.58857	3.7521
NKAIN4	4.52556	5.36707	5.0469	7.33359	6.12751	6.97021	5.97747	5.84221	4.43104	5.44291	4.76169	4.45129	4.8763	5.0182	4.48462	5.57168	4.85249	5.74034	6.00378	7.8708	6.20841	6.00156	4.55823	6.38934	5.74515	5.32393	5.41618	5.77302	7.74237	7.07965	4.55518	4.5718	7.70563	5.03687	4.73569	4.58299	4.54234	4.54377	7.40229	4.99828	4.9165	4.66188	4.95052	4.97238	5.97038	8.03668	5.24128	5.33864	4.96329
RP11-568N6.1	3.78525	3.94888	3.81007	3.73086	4.30834	6.05358	4.7311	5.80164	4.26707	5.33449	4.16878	4.77249	3.95179	3.99057	5.4976	6.7509	3.94972	4.89887	4.039	5.41618	3.72835	4.90713	3.94034	4.1486	3.8787	3.85668	4.03775	4.12986	5.81362	5.65693	4.14371	4.7038	4.56315	5.09462	3.59071	4.14328	3.77493	4.36929	5.93716	3.88543	4.29288	3.72304	6.4609	4.91072	3.67141	5.08798	3.96825	5.53589	5.29948
SCNN1B	4.67395	4.72061	4.59029	7.89022	4.36572	4.31834	4.56875	4.55196	4.41511	4.1684	4.31793	4.571	4.62014	4.95335	4.70655	4.5454	4.22027	4.23036	4.50626	4.82026	9.82009	4.34587	6.3663	4.22756	4.30511	4.40783	4.61088	5.74034	5.99686	4.52154	4.47665	4.54415	4.44797	5.74588	6.43845	7.58336	4.42921	4.70589	6.20042	4.34871	6.20511	4.56091	4.37482	4.50647	4.51098	4.49762	4.49331	4.39595	4.39215
SLC6A1	4.46909	3.66114	4.40804	5.72835	5.69392	5.36616	4.40218	4.55235	7.22117	5.83303	5.79777	6.10404	4.00474	4.10782	4.91395	4.95904	4.82383	5.71048	4.09072	5.03445	6.30202	4.74106	4.30374	3.6006	6.88606	5.08214	4.09257	5.06386	3.82936	4.15122	6.31251	5.29569	3.74168	4.97996	3.79861	4.71311	6.21104	4.83665	5.17346	4.36713	6.19393	3.45053	4.10897	4.22392	3.56867	4.53734	3.52755	3.58316	4.16462
MAGEA12	4.31511	8.96024	3.43752	3.54209	3.68919	3.46576	3.5585	3.83	3.44169	3.51658	3.59654	3.61232	3.35823	3.57455	3.65092	3.66277	3.49356	3.73268	3.5317	3.75566	3.61376	3.68339	4.41904	3.5317	3.53753	3.41089	3.67071	3.62146	3.77424	3.22036	3.60475	3.61353	3.39713	3.43752	3.75635	3.55029	3.69176	3.5912	3.47633	3.79955	3.53221	3.57065	3.6593	3.49063	8.01776	3.3537	3.55755	3.59642	3.41117
CHI3L1	4.14144	7.30982	5.05748	8.17834	7.47266	5.63056	5.09375	5.36158	6.36845	4.88923	5.54367	5.58528	4.24055	5.09775	4.40624	4.38083	5.2375	5.98291	4.29327	6.03966	7.28552	6.52083	7.43402	5.17977	5.85879	9.08685	7.74332	6.82101	6.67959	5.99611	5.31495	4.67639	5.90463	5.15902	6.32213	4.52074	6.96192	4.44227	7.00171	5.57406	4.75957	5.57802	5.90656	5.21089	9.06983	5.93667	7.05682	5.90757	4.66207
TSPAN7	8.41686	6.01439	5.58668	7.02117	7.48237	8.30242	10.2532	6.83301	7.78834	8.60489	5.11675	8.69771	10.2852	7.39685	7.94767	5.67234	5.33999	8.44619	5.01226	7.08535	5.59232	7.5348	7.08201	6.39458	8.60926	7.11777	5.32464	8.66592	6.82972	5.50662	9.03628	9.25199	5.48266	8.87793	8.70394	8.69367	7.8708	8.45436	5.84802	8.3285	8.24609	4.98639	7.97885	6.04142	9.1177	6.60916	6.51263	6.32843	7.8932
ITIH5	6.81822	4.63994	8.67122	6.31839	7.11473	6.60085	7.4376	9.20925	7.41474	7.35376	6.93824	5.94646	8.33098	7.61906	6.1995	7.32867	5.89871	7.70601	9.0312	7.07526	8.25946	5.92211	4.9004	8.89699	5.94008	7.24374	6.27113	6.88703	7.35679	6.26004	6.61285	6.02642	8.19941	6.0842	6.59427	7.14374	6.5747	7.67453	9.07603	6.92186	7.28289	4.52315	5.81931	5.13694	4.57201	8.60708	5.36315	8.28616	5.97216
CDH17	4.29134	3.61209	4.3373	5.99006	3.91808	3.84292	3.72767	4.02554	3.90489	4.0622	4.06467	3.99833	3.772	3.59243	3.99594	4.56397	6.09653	3.95466	3.958	3.93673	4.13287	4.09379	5.30132	9.85529	3.97313	3.89182	5.31581	4.08911	4.17324	5.66286	3.98487	4.10378	3.94702	4.00579	3.62146	3.80065	3.80199	4.02225	4.02901	3.82914	3.92485	5.41028	3.88694	3.75098	3.89536	4.61718	9.95625	3.95905	3.68686
UGT8	6.00378	4.90496	5.04285	6.8668	7.8818	6.90981	8.27826	5.49084	6.34856	6.75294	5.93082	5.94746	10.5404	6.14117	6.59196	5.57824	3.7915	6.7866	4.30414	6.31198	7.72626	5.84196	5.3489	3.79632	6.04189	6.71713	5.88806	6.6338	7.69009	7.06384	6.59854	5.6261	7.0315	6.95179	4.99957	8.91689	5.17218	6.83244	6.10858	6.00654	5.96454	5.11611	5.97242	5.48472	3.62552	6.14883	3.75329	7.66019	5.91152
EIF3C	4.08511	3.80129	4.23057	4.75051	4.92564	4.81863	4.47241	5.56068	5.95044	5.67163	3.7458	3.57138	6.65987	4.28348	5.47046	5.43628	4.72703	4.61994	3.46822	3.25344	4.72124	6.64564	4.30494	4.25424	3.92996	4.41668	4.15882	4.15002	4.83181	4.39697	4.21316	5.26563	3.79955	4.04749	3.92528	4.0033	4.00825	3.49827	4.38651	4.64862	4.07562	6.14466	3.88866	4.46849	5.30718	4.2765	3.88822	4.26035	4.8015
STXBP6	4.23527	6.1656	4.56833	6.84266	5.09904	4.0744	6.15482	5.51434	4.44635	4.38651	6.15766	4.42901	8.44816	3.86615	4.14062	4.18071	5.03249	4.77249	3.92894	4.14938	7.37964	4.33988	5.77134	6.94447	5.72358	5.09223	4.87739	5.3575	4.69162	4.29384	4.73689	3.83964	6.08494	4.19788	4.47326	5.52064	5.00236	4.63191	4.82471	4.35911	4.29822	5.20887	5.28068	4.14472	5.56704	5.17107	5.06988	3.82566	4.4894
CD27	5.70883	8.57069	6.03327	5.19376	5.28761	6.6273	5.64879	9.37495	6.68186	5.33497	6.93023	8.30423	5.12245	5.59677	6.80308	8.47751	6.51545	5.74082	7.07597	8.41944	4.95964	8.05421	5.16387	5.91371	5.94307	5.45151	8.0819	6.61228	7.87427	5.27779	5.99481	5.52686	6.38137	5.881	5.98958	5.71241	6.79753	5.73439	8.21396	7.74522	6.50412	7.83078	5.97627	9.88149	5.47706	5.53967	6.03327	9.32419	7.668
LOC101928152	4.69795	6.26191	6.7932	6.38403	8.32603	4.9549	4.86415	5.95606	6.14818	4.59463	8.44619	5.75259	4.48822	4.76336	5.85442	6.62789	6.7866	5.57572	5.75146	7.43638	7.19352	7.71127	6.65338	4.86768	5.28293	4.82715	6.4609	6.21027	5.9428	4.50908	5.56588	4.63994	4.93074	4.68043	5.82921	5.17036	6.30331	4.73424	7.18107	5.55227	8.40908	6.937	4.89202	6.18624	5.48662	7.90184	4.66499	5.99006	5.02301
OR7E14P	5.5262	4.87027	4.96051	4.10222	4.68561	5.537	7.73434	4.19101	5.21443	5.44569	3.61715	5.56446	7.05171	5.93105	5.4228	5.91321	4.04274	6.25854	3.69266	4.36752	5.33255	4.80834	5.3975	8.02208	4.84588	4.64925	5.55928	5.29791	4.24691	7.86735	4.60562	5.94111	5.66478	5.96962	4.3523	6.80816	4.3541	5.31235	5.87414	4.73172	5.89871	3.67723	5.34158	5.76974	3.44636	4.10841	5.73265	7.72932	5.34518
SLC23A1	6.73101	4.68581	4.85964	5.11545	8.15319	8.09394	6.82597	4.71584	4.97826	5.85269	5.06838	5.2033	4.36992	4.88231	5.02366	6.06985	5.53386	4.96217	7.47992	7.34511	5.80736	4.90391	7.4567	4.40281	4.38612	4.52496	5.11086	4.75805	7.37771	6.02908	4.74211	4.82492	5.35677	6.4116	3.98549	5.53843	4.71437	5.50337	6.33009	5.24931	4.52701	5.97117	6.67463	4.26829	4.01055	7.53975	5.51292	4.98794	6.68452
SLC6A12	6.88232	6.21855	4.53004	6.29131	8.43326	8.57937	8.65751	4.80466	4.84628	8.52575	7.06857	7.20916	6.51433	4.80671	7.3965	5.93565	4.70315	8.16124	6.38855	7.9857	5.54132	6.5553	7.20138	8.75766	5.75855	6.15103	5.78431	7.41969	7.69638	8.07359	8.33098	6.12703	8.19829	8.0307	6.27773	8.97285	8.42198	7.36965	6.59307	7.62616	6.18751	5.4671	7.36212	5.27508	5.90678	8.51827	6.16229	7.37076	7.61488
PTPRD	4.58583	6.92989	5.76855	4.20647	4.59172	4.16124	5.37462	4.75389	4.90536	4.79613	3.99535	4.81509	6.11832	5.86824	6.40841	5.10749	5.64948	5.815	4.01034	3.98697	4.20569	6.68305	3.84556	8.072	4.34974	3.96122	5.05875	5.35076	3.89281	6.07504	4.39317	3.83065	3.57984	6.00181	4.73024	4.87376	4.4559	3.924	4.15483	5.20841	4.90883	5.86947	5.99408	3.54877	6.3748	4.08569	6.90188	3.52728	5.3498
LINC00240	5.3237	4.00188	3.51505	4.48803	6.15561	4.80567	3.70103	4.45938	6.00132	5.03921	4.96352	5.79227	3.57088	4.00579	5.67498	6.28371	5.29392	6.36492	5.20887	5.44972	6.92093	5.12438	5.53546	3.70363	6.84723	6.64876	4.3426	4.93054	5.59823	5.17977	5.49852	5.44972	6.09627	4.03349	4.21702	4.46806	5.06904	5.11701	6.33625	6.42543	5.59372	4.56112	5.75686	4.56731	3.64824	5.10153	3.89236	5.8704	4.96692
SLFN13	5.62375	3.89087	4.9737	5.08214	6.47163	4.81131	4.18208	5.58102	5.10083	5.89651	4.52927	5.63289	4.20429	4.22109	6.71567	5.71287	5.21994	5.48153	5.03641	5.25319	6.13734	6.843	6.16994	6.46995	5.8224	5.28513	5.44039	5.07053	6.08616	7.85233	4.20052	5.63588	4.90671	6.13758	3.98198	4.75389	5.26541	6.87783	6.704	5.90149	5.98443	5.28293	7.12126	6.00036	4.56315	5.25882	4.08345	7.45868	6.81215
CALCRL	5.55855	4.99331	5.9765	7.53204	7.15027	7.31129	5.77021	5.3519	7.96847	7.20421	5.34135	7.60586	4.97107	4.36292	6.22496	5.71048	4.74436	7.8621	4.74968	5.1665	6.12425	6.8167	5.12861	4.39037	7.24121	6.05927	5.14746	6.9925	5.20532	4.4153	8.34809	6.27538	6.5044	7.34242	6.87535	6.08565	6.89486	7.51929	5.4522	6.57106	5.65201	5.46574	6.67107	5.86114	6.57524	6.02492	5.00549	5.47804	6.87439
ALPK3	7.99244	5.58357	5.09971	7.94202	7.70563	5.15968	7.86735	4.87003	7.12975	5.14547	4.77372	5.88199	8.70634	4.99957	5.46056	5.02736	4.95904	6.85785	4.921	5.29636	7.64562	7.30361	5.02822	4.51305	6.66389	7.19527	4.45731	6.11427	6.86034	7.55757	5.89626	6.06055	5.55855	5.41704	5.77828	6.54456	6.36188	6.0549	5.40599	5.29007	6.56244	4.71147	7.39067	4.93863	6.12246	5.01526	4.70843	7.37007	8.23849
LAMB3	5.6407	7.07025	8.10349	7.09796	7.21059	5.69274	5.4676	6.26992	6.60555	5.0017	6.50046	4.84105	5.83569	5.12245	4.84022	5.64428	6.92673	5.64855	6.87657	6.47489	8.67757	4.87503	7.75864	5.62962	5.14943	6.85466	5.8278	5.55132	6.53242	5.28513	5.80858	5.10018	7.38491	5.10373	5.70562	7.29236	6.35171	5.00946	9.10448	5.46148	6.58343	5.64382	4.7802	7.25186	5.29191	8.82271	5.77279	9.26188	5.60605
MAOA	8.03557	5.96224	5.25407	8.33611	9.0941	7.8823	7.73198	6.41732	5.66054	6.64303	6.55867	6.43373	8.38187	7.59686	7.09704	9.60904	5.88992	9.25566	6.54171	8.59191	8.63019	5.61288	8.95638	8.89875	7.18533	7.15198	6.65427	8.21111	7.69146	8.08454	8.49119	8.63318	10.5239	7.97885	7.51729	8.9187	7.14826	6.59137	7.67753	7.78313	7.64562	4.90774	8.21456	5.21307	9.22592	8.46308	7.68474	8.11781	8.53226
PRUNE2	7.31469	4.97046	4.87975	7.85379	7.49372	5.67072	4.67721	8.23967	8.05143	8.99102	6.58257	9.39019	4.24573	7.84116	9.11884	9.7247	5.4617	9.05404	6.43899	7.24933	7.80927	7.30414	9.27695	10.1462	8.83745	8.75766	7.28476	8.93377	7.64082	8.01003	9.47789	8.71497	8.13303	8.69447	9.09512	6.69309	7.91074	9.92935	7.08169	9.71795	7.20701	4.28071	9.48929	6.90981	4.94627	7.01306	10.6715	8.82429	9.30405
ALPL	6.11832	4.42758	4.48134	4.27111	5.5424	5.69104	5.22875	4.47665	5.44429	7.02773	5.48846	6.81305	4.59849	5.51946	4.87438	4.65343	4.67001	4.92665	4.50485	4.48559	4.89802	4.71396	6.4238	4.6464	6.28163	6.8955	4.6958	6.30012	4.56588	5.01354	6.24391	6.6525	7.04376	6.16282	5.42651	4.94886	5.57619	6.51717	4.55391	7.14928	4.84251	4.5718	7.47869	4.72519	5.00729	4.65904	5.10396	4.84403	5.83497
L1CAM	5.01694	7.58917	6.87343	4.93653	4.82177	4.85616	5.29971	5.03404	4.94971	4.73045	4.86136	4.94056	5.48966	8.10067	4.96671	4.92665	9.43573	4.67395	5.33587	5.25573	4.75591	5.60484	5.01483	7.52091	4.7471	4.65622	8.97755	5.90149	7.09767	6.04562	4.87148	4.99694	5.13031	5.60929	5.21823	7.36252	5.07485	4.79466	6.12114	4.95575	5.20598	5.29369	4.921	6.03082	4.88352	6.01466	8.58372	6.06252	5.08819
LEAP2	6.24288	4.62363	5.15679	5.98933	5.81456	8.41232	7.10887	5.78768	5.36637	8.81421	7.22156	6.24059	4.85701	4.90436	7.81976	5.94695	5.30891	5.98159	6.03991	8.84446	6.57524	5.2248	7.07393	4.80446	5.68041	6.34933	6.25904	5.85369	10.1056	6.6149	6.2622	5.77492	6.09778	6.25854	5.7595	5.96651	5.59137	6.37262	6.65077	6.40975	7.55337	6.03627	8.36897	5.81931	5.56374	7.44048	5.70138	10.2797	7.25405
SLC23A3	5.17325	4.78169	4.44468	4.62547	7.33242	7.82463	6.82972	4.42657	4.73668	7.79074	4.67681	5.43628	5.03207	5.05492	6.26915	5.52642	4.74006	5.81953	4.29071	7.1871	4.95923	5.91321	5.78071	4.67701	4.90391	5.01632	5.5567	5.97602	7.2604	4.96329	5.04949	6.503	4.53201	6.71328	5.55527	5.71074	5.29636	6.03526	6.39731	5.77539	4.90818	4.75432	8.19236	4.5454	4.75051	6.39458	6.02811	8.64057	7.78313
FILIP1	4.21702	3.5106	4.79125	4.98987	5.14943	5.61119	4.49659	4.26056	6.44264	5.86875	4.28329	6.04636	4.2215	3.72328	4.88481	4.24055	3.86111	6.4	4.12618	4.97782	5.44591	5.5222	3.99158	3.59677	6.60112	5.32464	4.08039	6.20042	3.89368	3.90592	6.72504	6.65077	4.02369	5.26338	5.49619	5.28335	6.64331	5.81647	4.71209	5.43995	4.97692	3.78677	4.79675	4.33342	4.79675	4.68818	4.16325	3.99555	4.61866
SULT1C2	7.26585	5.24323	5.69467	7.04438	7.91277	7.89924	8.58745	4.22008	6.20763	6.98585	7.87586	5.87132	9.47068	8.25702	6.21699	6.16204	5.29791	6.34346	4.39914	7.56533	6.29846	6.72895	8.60416	8.28744	7.28329	7.10749	6.6839	7.26799	8.20345	9.12419	8.66433	4.97415	7.49165	7.04178	6.68017	7.9118	6.90407	6.83924	7.23297	7.02319	6.65338	4.09094	6.81032	4.78359	4.12555	6.76275	8.75099	7.07364	7.49372
LOC100422737	9.11342	5.26361	4.93015	7.94152	8.78215	8.65191	7.28255	7.33511	7.13451	9.02623	6.32319	8.97176	3.9937	6.25953	8.35301	8.76496	7.73789	8.66135	7.10782	8.13246	7.39267	7.38715	7.92193	7.37042	6.64536	7.01338	5.47964	7.72889	8.54234	8.22578	8.18123	6.67608	6.41347	9.25075	7.29389	6.67493	6.81275	8.87882	7.24812	7.76596	7.84696	4.56294	7.22511	6.6218	4.09379	7.06957	5.26204	5.82895	8.92993
NEK5	4.11791	3.09392	4.29863	3.75793	4.1191	4.65093	3.58291	3.64442	4.21013	5.37849	3.20596	4.77977	3.15461	5.21617	6.13353	5.23367	6.19367	4.39357	3.62715	4.26241	3.98157	4.6939	5.94525	3.70502	4.53331	4.89097	4.0526	4.3906	4.81527	5.30581	3.77826	4.06867	3.64088	4.33201	3.4877	4.13442	3.63142	4.53061	3.83811	4.84083	4.15163	3.45496	4.48881	3.47843	3.24978	4.00392	3.58558	3.93176	4.78542
RBP5	9.63395	6.97151	5.75121	6.81945	10.5566	10.2427	8.88141	6.92737	8.42258	10.0911	7.35337	9.81021	5.74373	7.49523	9.05833	9.62733	6.56071	9.9933	9.16056	9.72648	8.12187	8.30859	9.61402	7.38528	8.1001	8.86991	7.92343	9.29432	10.8931	7.06317	9.64708	9.20126	9.67596	10.4012	9.25566	8.18587	9.47068	10.4679	9.09082	9.19422	6.34592	6.79597	9.73738	6.42191	5.48616	10.4435	5.43087	11.315	9.97349
RASSF6	4.67105	3.67656	4.30951	6.56799	6.0028	6.82161	5.90413	5.26385	7.39724	7.27858	4.53539	6.3248	5.24801	7.0447	8.22635	7.52091	6.16483	6.75057	5.23345	5.64618	6.59968	6.97119	6.24161	5.704	6.80703	6.71387	4.98882	6.30964	5.89282	7.73563	6.48624	6.01809	5.93641	6.1643	5.76067	5.615	5.33404	6.50271	6.66364	7.02079	7.54427	6.34161	6.76663	5.04392	3.33398	6.61636	5.51457	6.85561	6.18113
ZNF702P	3.41811	3.4558	5.80259	4.70402	4.96865	4.29525	4.06364	4.1486	5.1882	5.20752	4.43331	4.27631	4.50769	3.69679	5.59677	6.01762	3.91656	5.06602	4.00599	3.9399	4.74795	3.83	6.04335	7.14893	5.42901	3.85367	7.4057	4.65987	4.04873	5.18088	5.9748	4.83181	4.96692	4.16483	3.62904	5.8739	4.55353	4.30795	5.78049	5.42116	3.97268	3.62244	4.96567	4.70741	4.53287	3.81334	6.00875	4.42596	4.81527
CYTIP	5.52313	7.67836	6.19825	6.82972	5.86536	6.97866	8.36328	9.39152	7.44989	6.392	7.92343	7.29309	8.5693	5.17152	6.36158	9.05716	8.03128	6.8668	6.5708	8.42597	5.84779	7.66577	4.44227	4.92481	7.14269	7.18746	8.29998	6.62583	7.56955	5.3867	6.23371	6.41079	6.74515	5.81027	5.96603	5.89969	6.72298	5.27735	7.79262	7.15333	6.9932	7.98303	6.32213	8.32049	7.71946	5.92744	6.18598	7.48471	6.59334
SLITRK5	5.41005	3.36101	4.4886	3.30999	3.55029	3.53399	3.5114	3.57311	4.63274	3.66301	3.34983	5.93693	3.43807	4.3153	5.46263	3.73018	3.47736	3.69357	3.47284	3.38026	3.49434	3.56409	3.71382	3.40172	5.62517	4.83181	3.66069	3.64256	3.58435	3.42218	3.3785	4.56315	3.60817	5.02928	3.55655	3.36835	3.54341	5.81743	3.64848	4.25642	3.9333	3.36628	5.54536	3.53094	3.50336	3.47041	3.4994	3.62667	4.44863
PGBD5	9.19653	6.14769	5.1997	4.9974	7.65508	6.8971	6.05853	5.81766	7.40527	7.57539	9.84929	7.68602	4.57656	6.70991	8.68524	6.91449	4.93379	6.39256	8.91689	6.41981	5.30402	6.12878	7.17715	4.2268	6.74453	8.14808	6.97275	5.21802	6.93449	6.2622	7.5614	7.1393	8.14395	7.51036	5.20172	5.81171	5.85495	7.73111	6.49147	8.16411	7.42278	4.25323	5.97265	7.6977	5.13138	8.03892	7.21318	6.24957	6.22007
SBSPON	4.134	6.77178	6.11655	7.3283	6.23875	5.43972	4.53201	5.42923	5.07527	3.87505	4.6943	6.2801	4.1486	5.24062	6.76933	5.52847	7.01145	6.28916	4.07999	5.58357	7.91828	6.81391	6.60381	5.82562	5.14372	6.0948	5.29369	6.4051	4.77541	5.5287	5.53772	6.00307	9.20126	6.39316	5.44926	6.1013	5.95628	6.02268	6.50215	6.60555	6.87375	4.89075	5.75903	5.54823	3.87147	4.93948	4.66291	4.84546	4.76484
PCSK1	3.56159	3.61813	3.45741	3.48162	3.52988	3.5548	3.28249	4.52762	3.85303	3.90259	6.1201	3.48692	3.36341	3.5281	3.67024	3.63023	6.01973	3.69176	3.87442	3.6899	4.01696	3.30967	3.45467	3.27111	3.86238	4.23346	3.38907	3.62095	4.02836	3.41323	3.50203	3.99895	3.54285	3.68339	3.61905	3.52908	3.70943	3.63188	3.46958	3.83108	3.45081	3.73495	3.67307	3.69468	7.80978	4.38711	5.55905	3.57016	3.60304
TNIP3	3.27537	3.80526	3.435	4.00913	3.26275	3.55276	3.39021	3.9399	3.61564	3.41249	4.00188	4.03493	3.39393	3.17225	3.8081	4.21518	3.73583	3.42993	4.12986	4.08588	4.73446	3.75497	3.53298	3.42418	3.46436	3.6338	4.3153	3.41843	3.86217	6.01239	3.44194	3.52755	7.20356	3.39082	3.38057	3.50748	3.70223	3.47711	4.76377	4.07957	3.35495	5.056	3.46163	6.26163	3.40172	7.24593	3.49566	5.55349	4.29485
AGT	7.87174	5.89917	6.68452	9.14057	10.1368	11.5378	10.2936	5.62517	6.64591	10.3616	11.362	8.7729	4.9359	5.90413	10.537	9.31146	6.06181	8.24141	7.85379	9.59967	9.16284	8.27645	10.5269	4.62985	7.58336	9.57215	6.75384	8.19058	9.73738	7.8251	10.0378	8.55466	11.8601	8.30053	8.45029	7.71475	8.55913	8.69847	9.12979	9.33748	9.05833	5.83303	9.77674	6.98711	6.0797	8.12298	6.80908	7.57881	9.78608
LRRTM4	3.11493	3.04556	2.97754	3.05544	3.46765	3.22469	3.59677	2.98146	3.75414	3.02317	3.09085	3.09085	3.08087	3.0083	2.96523	3.15164	3.03417	2.94256	3.11733	3.11871	3.06103	3.69426	3.14262	2.99357	3.24194	3.78901	2.98897	2.95847	3.04144	3.01384	2.96608	3.23254	3.12289	3.14077	3.01518	3.1265	3.25344	3.1192	2.9525	3.08668	3.97543	3.06627	3.23429	3.17941	3.08721	3.22761	3.45608	2.94806	2.98607
COLCA2	7.35603	4.45169	4.84819	7.14514	5.60439	6.52416	8.96024	5.6745	4.65926	7.11989	5.64971	6.76244	9.91231	5.56889	7.20282	7.18248	5.76158	6.84391	4.62488	5.82825	7.00106	6.24957	8.34315	4.3875	6.15688	6.75748	5.68784	7.84071	5.30361	7.05413	6.33378	5.66691	7.97207	6.4535	6.28112	7.16867	5.40897	6.71174	5.34158	6.79567	6.48902	5.99181	7.16448	4.33322	3.99099	5.35821	6.73038	4.09931	5.08278
ADAMTS3	3.60625	4.67478	4.44881	4.55801	5.25452	5.02194	4.29134	4.30396	6.34985	4.13193	3.75098	4.63502	4.81674	5.02127	3.98136	4.54624	3.83151	4.80024	4.00309	5.18088	4.81297	4.64702	6.08838	5.47395	5.87904	4.79824	5.88564	5.39727	4.06344	5.17822	4.54049	5.23794	4.36613	4.04935	3.49036	4.58665	5.615	3.8913	4.47178	4.7256	5.56351	5.06815	3.825	5.35002	5.16585	4.9187	6.49176	4.47055	3.74624
PMCH	4.40826	5.2082	5.0669	4.46604	4.15882	4.21801	4.31593	6.1574	5.22233	4.0035	6.88764	4.83893	4.0901	4.06826	4.72124	5.9209	4.83201	4.00579	5.42901	6.60523	6.89229	6.11304	3.92083	3.95466	4.38102	4.05627	5.12967	4.3377	5.00482	4.01411	3.97457	3.79284	4.23267	4.39377	3.89043	3.91958	4.20073	3.96866	5.44243	6.31811	3.60085	5.44569	3.95013	6.55585	5.42764	5.05071	3.90466	8.17834	4.55497
GDA	6.44448	5.18687	4.86768	8.0995	6.92609	8.01335	7.10956	5.77562	4.65517	7.21026	7.74107	6.68627	4.68725	6.4302	8.25702	6.58596	6.63701	7.09527	8.02964	7.15533	6.37694	5.73439	6.37424	6.27353	6.45569	5.8307	5.50828	6.72776	7.92393	7.68793	6.07575	6.01617	7.55673	7.44361	5.28425	4.80693	5.11767	7.16582	6.53739	5.92502	5.38305	6.8795	7.72802	4.13483	4.07073	7.49921	8.05746	7.26585	7.67836
NFE2L3	4.68213	6.09677	6.41891	5.4377	5.93542	4.76254	3.93306	6.96158	7.11536	5.53363	4.89268	5.81095	4.32709	4.07173	5.68784	5.66833	4.8495	5.42533	5.71146	6.43345	5.20424	5.69492	6.77666	3.59095	5.79438	5.70235	8.39159	5.5036	5.34608	5.28695	6.00552	5.91622	6.97246	5.26049	4.16798	5.00527	5.94572	5.64143	6.79691	5.82613	5.0362	6.52141	5.02258	8.10404	4.22109	5.24128	4.14595	7.16516	5.15813
FLJ37786	4.1278	3.20221	3.23638	3.20221	4.17686	3.15544	3.10198	3.12243	2.97595	3.05772	3.16051	3.05426	3.25145	3.07231	3.31939	3.63653	3.01311	3.32586	3.17858	3.36777	3.1381	3.08873	3.28869	3.07825	3.03102	3.06848	3.06329	3.097	3.02253	3.06568	3.15884	3.07078	3.097	3.36003	3.06395	3.03478	3.42245	3.06848	3.23181	2.97432	3.23466	5.47642	3.07881	3.12894	3.01589	3.277	3.27238	3.19464	3.05247
LOC100507311	5.03708	3.99514	5.88612	5.83809	6.94512	7.23589	5.81672	6.95045	6.74298	7.96684	6.07277	8.11956	5.33404	7.2032	9.21991	7.83606	7.19143	7.01951	6.80031	6.20117	5.76401	8.7142	6.86034	4.94204	7.54187	7.35751	6.04066	7.60375	7.71989	7.88131	7.33024	5.98933	5.58151	6.8936	6.97601	7.24855	7.11407	5.83833	6.52055	7.40682	8.46115	4.4008	6.28916	6.88169	5.02017	5.47139	5.495	4.45453	7.45191
CDH13	7.54226	8.3291	5.72026	7.0315	6.92474	6.86496	5.56185	6.14645	8.48221	7.74522	6.03107	8.02591	4.58562	3.63796	7.37692	5.87561	5.25093	7.72402	5.54872	7.05786	6.71328	6.89229	6.03475	4.06281	7.82363	6.97307	5.62049	6.96731	5.54485	4.25683	8.03442	7.6007	5.94572	7.10408	7.59308	6.25141	7.48643	7.43402	6.22134	6.659	6.06653	5.28181	6.28731	5.52132	6.3811	5.9202	4.32377	4.97715	6.77362
MPPED2	4.76958	3.52554	4.00085	4.69854	4.42067	5.05578	7.15198	3.69106	4.77144	4.76169	4.01975	5.17197	8.97755	4.81719	4.21334	3.40885	3.52404	5.14638	4.14328	4.62469	3.65736	4.06948	3.55678	3.33877	4.46302	3.45715	3.58291	5.46901	3.78325	4.48658	4.33893	4.47626	3.35879	5.13671	3.85069	7.75593	4.5533	4.41865	4.7528	3.90508	6.07773	3.51529	3.77759	3.66301	3.98612	4.00267	3.59443	3.66135	3.79794
TOP2A	3.58316	5.94111	6.55753	4.32116	5.21617	4.81546	3.91306	5.60678	5.02322	4.56955	5.67786	4.88481	4.31855	3.4347	5.48662	5.43905	5.37738	4.73689	5.69662	4.54477	4.8871	5.5581	6.18881	3.93196	4.86579	4.28934	6.52522	4.36272	5.76302	3.71802	4.52477	4.03836	4.26772	4.17098	3.92336	3.43111	4.39776	4.23308	6.01439	4.63127	4.83872	6.98806	4.49452	6.91133	6.3432	5.85173	4.15799	5.23277	4.27971
ALPK2	9.02221	4.90578	5.99056	9.82217	9.46486	7.97724	6.61551	7.64301	8.98705	10.1462	6.30964	10.3073	4.09132	4.83289	10.9386	9.4735	5.1922	9.30405	4.26991	9.70726	9.8774	10.4494	9.02623	4.98772	8.60489	9.52928	8.94675	9.54431	9.5413	9.30272	8.44687	9.91655	8.58447	9.74077	8.55832	7.22265	8.13246	9.53359	9.41814	10.3669	9.80291	5.27092	9.85529	7.68097	4.6507	8.84709	4.78667	10.6106	9.28553
ERV3-2	6.92989	5.33907	7.08775	5.72713	9.54276	8.06424	6.63469	8.83496	8.6445	8.16929	11.2557	7.75261	4.44776	7.55419	8.79304	7.58669	8.91689	9.03721	10.1105	7.07695	8.08353	8.26074	9.13541	5.1831	9.98867	8.40641	6.31839	8.10234	9.68621	10.0657	7.88382	7.71809	8.63099	8.83037	6.58228	8.21194	7.37157	8.34115	9.68269	9.77139	8.37354	8.80492	7.67365	6.16155	6.73971	9.16618	7.44586	8.40383	7.76095
C4orf19	4.85812	5.30891	4.1987	5.49737	7.12555	7.18179	7.68928	3.9322	5.69416	6.77813	4.23079	6.16736	8.04355	6.07252	6.80552	6.79259	4.05667	6.65281	6.93764	5.5799	6.63265	5.80399	5.83833	4.72641	4.4515	5.86536	4.54477	6.09117	4.6893	6.51545	6.06006	7.25515	9.65079	6.30278	4.59132	6.34856	5.49922	6.15308	5.34089	5.67924	5.59726	3.81427	6.62238	3.93157	3.67353	7.47191	8.28684	6.60138	6.95566
LINC00520	6.60665	7.11265	6.72415	6.843	6.72415	6.32265	6.80436	6.32345	6.40065	6.06373	6.85099	6.22782	7.34846	8.23354	6.42914	6.67608	6.80399	6.42219	6.84515	6.72389	6.56477	7.61401	6.47329	6.49483	6.40594	6.39838	6.48652	6.40403	6.97933	7.15885	6.64188	6.49176	6.95966	6.73009	9.60276	6.40486	6.25699	6.46747	6.20435	6.57498	6.82886	6.65486	6.32708	6.31681	6.81573	6.69804	6.39286	6.51941	6.77634
LRFN5	4.19121	4.43839	3.55076	3.58831	3.56514	3.54752	6.72776	3.87126	3.81906	3.65138	7.17964	3.57631	8.57429	3.77604	3.56384	3.46329	3.55004	5.34273	6.71085	3.68526	3.60966	3.74056	3.59868	3.89043	4.11423	4.22008	3.72584	3.73821	4.32018	3.70103	4.06635	4.26991	3.62244	3.69357	3.85221	3.83108	3.80396	3.68823	3.63892	3.33729	4.28329	3.59797	3.63701	3.45383	3.95529	4.45511	3.40511	3.7322	3.62172
MROH2A	3.70337	3.55506	3.50336	3.84985	4.36734	3.79191	3.61881	3.56282	3.65399	3.385	4.21071	3.56384	3.42802	3.69822	3.75862	3.99432	3.62095	4.52074	3.68459	4.1384	3.6473	3.7226	5.06252	4.2597	3.62048	3.88038	3.79127	3.91525	3.86006	4.2489	6.5078	3.7895	3.95865	3.74396	4.26419	3.46687	3.51482	4.09603	7.06489	3.83919	4.28775	3.46932	3.55004	3.52505	3.62506	4.14282	3.72236	3.63023	4.01935
CCL28	7.76954	4.76297	5.83886	8.83411	7.95956	6.06158	5.36091	4.51552	6.43373	7.17859	4.71522	6.07598	4.34072	4.41707	6.27512	5.65385	6.88545	7.83511	4.38897	5.18288	7.28772	6.62064	7.27196	6.5567	6.63755	7.83412	5.86536	8.01941	4.28874	7.44241	4.50748	4.41885	7.19774	5.09596	7.08674	6.23297	7.53566	6.96255	6.06502	7.63183	6.41541	4.68192	7.15333	4.46604	4.24752	6.87249	4.45001	4.56334	7.08065
PDGFRL	7.32681	8.36965	5.38509	4.92524	5.56138	4.78563	4.61383	7.88672	6.13866	4.70174	4.73234	5.60772	5.46194	4.26117	4.45957	6.10805	6.18368	4.94584	5.6378	5.49808	4.99204	4.21861	4.18449	5.17281	6.21596	6.12803	4.93632	4.49432	6.10502	4.48617	5.03985	4.648	7.67022	5.27232	3.98717	5.21928	6.69399	4.73813	5.6345	4.66127	5.38235	5.11086	4.41256	4.42901	8.25455	6.81915	4.76484	4.50626	4.55801
DYNLRB2	6.57498	4.09398	3.80086	4.33139	5.07207	6.226	4.57364	4.60193	4.73986	5.46263	4.05907	5.86183	3.9036	5.2415	6.00156	6.69744	4.8383	6.04485	4.2849	4.86518	5.02949	4.97238	5.45566	5.91078	4.68393	4.59132	3.55404	4.62923	5.41889	6.13684	4.51933	5.04886	5.37063	5.89061	4.039	5.37397	4.68192	6.24957	4.90518	4.92858	4.2765	3.46516	5.44794	3.99574	3.55326	4.94305	4.93096	5.35168	6.63441
TOX	3.99307	5.52038	4.16562	3.82372	4.05627	4.78255	3.94846	5.74106	4.84127	3.97904	4.9648	5.43248	3.39108	3.8059	5.19667	5.20424	4.23977	4.32037	4.56262	5.81243	4.17	5.10197	4.21518	3.80481	4.25602	3.64419	5.42787	5.04412	5.41411	3.91634	4.29921	3.72559	4.90943	4.65132	3.89107	5.46078	4.48983	3.72747	4.92198	4.98794	4.0288	5.42116	3.6887	6.61228	3.77848	3.88822	4.68476	6.13991	5.16541
RP11-305O6.3	3.97924	3.64635	4.58906	4.67124	4.29447	4.97088	3.88188	4.3857	4.88989	5.00458	4.16044	5.57168	4.04059	3.88272	5.09201	5.03728	4.25909	5.21594	4.05726	3.93906	5.15989	6.6393	4.79507	3.79908	4.9482	5.02388	3.82698	5.23817	3.76629	3.8224	5.02237	6.00231	4.74987	4.44529	4.21013	4.80128	5.88564	4.87568	4.94412	4.5778	6.79535	4.40826	3.96658	5.57753	5.42627	4.20849	4.21355	3.21704	3.8808
CCDC91	5.2006	5.22277	6.65664	7.45868	9.18191	7.45275	6.87915	7.30514	6.46197	6.63843	10.2608	6.85847	7.35861	5.52155	7.23153	9.74077	7.60675	7.10782	6.85716	8.83836	8.38313	7.04112	7.37157	6.33168	6.50727	8.30182	7.59947	6.33755	7.72536	6.96572	8.084	6.43733	7.4076	6.10452	5.15101	7.10033	7.03118	6.31785	10.4711	6.74364	7.00743	7.13113	6.6685	8.01776	7.30361	7.94922	6.43373	7.26216	7.00715
SLC16A7	4.56875	4.94056	5.04647	6.19245	5.35284	5.05664	7.39529	5.55277	5.64143	4.37095	4.48559	4.46418	10.0748	6.53467	4.58477	5.50403	4.97284	5.05748	5.12861	4.47792	6.47984	5.45544	4.18489	5.2874	5.24257	4.36572	5.22386	5.02604	5.67546	6.61863	4.87312	4.48559	5.39591	5.06623	4.52827	6.70341	4.84465	4.08788	5.43795	5.02041	5.20015	5.85021	4.42737	5.31188	5.57406	5.51503	8.22231	4.6906	4.34544
CLDN3	7.42469	5.95752	5.45318	6.67959	6.96447	6.34161	6.36896	4.63502	5.03207	7.09527	4.52335	7.21826	5.20306	6.11857	6.56993	6.14843	5.35977	6.58901	5.10329	5.43062	6.83153	7.04503	8.1423	5.9157	5.64879	6.42301	6.1829	7.35861	7.06685	10.1271	5.57361	6.61316	7.2604	7.4812	6.07302	8.19236	6.34805	7.78022	7.19562	6.61721	5.6997	4.70507	7.31544	4.67701	4.50026	7.22441	4.84169	8.72362	7.67494
BEST4	4.06063	4.07605	4.11483	5.33953	5.67187	4.01222	4.10281	5.09596	5.3475	3.88437	4.17219	4.18816	3.78303	3.65138	4.19344	4.12862	4.06344	4.56631	3.72813	4.53801	5.88682	4.92524	4.45212	3.84178	5.74326	5.71787	4.24036	4.37174	4.55761	4.17947	4.00825	4.35989	4.00226	4.11094	3.94972	4.1697	5.85926	4.11262	6.21283	3.84556	4.75828	4.13276	4.28855	4.25581	4.30774	4.59441	3.91463	3.86194	3.96313
ANKRD29	7.18179	4.72145	5.92915	8.46177	7.18391	5.82895	6.86496	6.30433	6.24595	5.90343	5.47617	5.77087	8.13539	7.64173	7.68648	5.89137	6.97837	6.68333	4.88417	6.86157	7.50917	5.11811	6.30012	9.455	6.65813	5.85614	6.21362	6.33063	5.72307	6.78323	6.34482	5.36136	5.57595	6.83522	4.74148	5.15679	6.06373	6.0948	5.51059	6.69628	5.75327	4.38144	4.12697	6.78381	3.59746	6.22496	8.41169	7.37537	5.53033
ZNF667-AS1	8.34494	6.24239	5.48245	7.81597	5.56351	6.15714	8.92723	5.15748	6.82916	8.24727	5.16408	7.12627	9.02221	7.77283	5.41189	4.73234	5.0538	6.81451	4.68314	6.67133	5.5071	5.62938	4.91816	8.75019	7.22511	6.09043	5.60338	7.64607	5.08106	6.86343	6.65397	7.54629	4.50026	6.79354	6.36923	8.53297	7.63361	8.14629	5.89724	5.86348	7.90982	4.36532	5.6745	4.84148	7.99047	6.85033	7.6007	4.82261	5.38992
THSD7A	5.30557	4.76336	4.96329	6.1108	6.95113	6.6161	8.28188	4.75644	6.16155	7.33621	4.60729	5.97627	9.95625	6.58171	5.32323	5.55527	4.2595	7.64732	4.44002	5.63927	5.64928	6.84455	6.53021	9.77497	7.1775	6.00063	5.34339	6.56071	5.17688	7.07597	7.00808	6.69125	4.12299	6.78261	4.95945	8.53665	6.38589	5.9765	5.1517	6.38775	6.59252	4.57909	5.34089	5.2573	5.3489	5.69104	6.14769	4.04728	5.72738
CLDN1	6.10983	8.50519	5.93278	8.06819	6.64906	5.19903	5.38509	7.3899	6.17205	7.01211	5.20447	6.28473	5.66645	7.2388	6.80494	8.27342	7.67964	6.54541	4.78276	5.84873	8.24665	7.02841	6.57918	4.69601	6.92892	6.37398	8.22519	6.15331	4.88417	6.84909	4.73382	9.78257	7.68309	7.1021	5.24801	7.45513	6.19245	6.73337	8.89619	6.22677	5.87587	4.5085	8.20937	7.00339	4.3353	7.5838	5.30425	6.99517	6.52332
DACH1	4.70046	4.06467	4.4329	4.16362	4.88372	4.77249	3.99854	3.96951	5.78528	5.15541	3.99769	5.01864	3.68595	6.1847	5.00861	3.8913	3.63552	4.715	3.64947	3.89747	4.934	3.91634	3.95444	3.51557	5.61475	4.85424	3.7801	5.66764	3.96058	3.62786	5.33474	5.37761	3.85048	5.22742	4.58686	5.85716	5.77302	5.58883	4.21782	4.28893	5.21443	3.71007	4.28934	4.08608	5.056	4.22188	3.38845	3.54976	4.68171
EHHADH	6.2645	4.98104	5.14943	5.62121	9.05507	8.30674	7.05242	6.34856	7.28882	9.64708	6.43156	8.29195	5.87904	6.49986	8.88752	8.86547	5.23526	8.02376	5.59466	9.22366	6.93023	6.43705	9.13323	7.77742	7.39306	7.98888	6.70959	7.1599	8.60997	8.36075	9.09613	7.99904	8.65265	9.28187	6.73038	7.34549	7.3594	8.94018	7.34697	7.33549	5.04349	6.76332	9.14715	5.76007	4.49944	8.14395	8.02376	8.63099	8.82598
ZC3H12D	5.58996	5.34518	4.98639	4.54336	4.11324	6.19575	4.27409	6.44315	4.74356	4.81488	6.37213	5.57776	3.96866	3.81709	5.79993	6.21829	4.56731	5.51757	4.97457	7.0888	4.16325	6.62789	4.39553	5.30085	5.48012	4.62297	5.43928	5.2149	5.41868	4.69224	4.69854	4.64821	4.32483	4.71353	3.74985	4.25263	5.49153	5.08021	6.02093	5.56795	5.14311	6.18934	4.76754	7.4644	5.00128	4.95011	4.12261	6.68895	6.00754
CTD-2540F13.2	5.62145	3.35677	3.85603	4.20569	4.59213	5.02278	3.6516	4.04668	3.86228	6.04856	4.11364	5.09688	3.20671	3.48692	5.83592	4.87527	3.62412	5.62469	4.81234	4.89202	6.1796	5.66005	4.68213	3.54261	4.91733	5.41257	3.99452	4.46017	5.31358	3.61281	4.80578	4.39756	3.81841	5.73147	3.33247	3.80023	4.55863	5.95854	5.24062	5.78528	5.85716	4.77103	5.25276	3.58869	3.20633	4.34668	3.32153	5.00637	5.51037
SLC22A4	8.14517	6.53101	5.94332	6.27512	6.51408	7.77928	6.37641	5.90805	5.7442	8.86378	7.67198	7.63457	3.80152	3.85178	9.80634	6.57359	6.1066	8.1567	8.2932	6.84693	6.79145	5.52383	7.17783	4.08872	5.94846	6.31463	7.34401	8.02591	7.3196	6.33378	7.66666	9.78608	8.31306	8.86726	6.85656	5.17594	6.8025	9.04592	6.5837	7.7157	4.8901	6.20587	7.47515	6.77148	5.05205	7.39378	5.62962	7.11606	7.94558
CCDC113	4.27908	4.40341	4.4408	4.3875	6.41891	4.10917	4.54801	5.2534	4.96567	3.59443	4.52807	3.92767	4.07605	5.9105	5.13031	5.57406	5.50946	5.00946	4.13213	4.952	5.37508	3.6353	5.51364	4.75828	4.18392	3.44005	3.94617	4.557	4.34668	5.99504	3.7535	3.80376	3.89979	4.09439	3.36777	5.01779	4.2081	4.00868	5.56747	3.88629	4.71127	4.16064	4.01656	4.50243	4.00825	5.41596	4.82636	4.26159	4.72744
CLDN10	8.73095	7.10923	6.78411	7.69896	8.53159	9.58829	8.24367	5.01924	6.48291	8.85664	5.97821	8.42731	4.93074	4.87089	8.59056	8.35748	4.45001	8.03836	4.67885	7.63545	6.99879	6.29741	8.69447	8.49873	6.5377	7.80784	5.52915	8.89346	8.62578	8.37998	8.9159	7.8669	8.50588	9.37913	7.58587	10.6602	6.97506	8.88227	6.15922	7.87328	5.94796	4.27929	9.46345	5.65084	4.41154	7.61698	7.5259	8.38438	9.03227
SIM1	4.58417	4.32647	5.25072	5.83184	4.46343	4.29346	5.76158	3.91871	4.84251	5.14164	3.90929	5.40623	8.15611	4.3523	5.77397	5.33	5.19421	4.94774	3.89662	3.85668	3.95341	5.53894	4.16584	3.74305	4.39337	5.60908	3.73198	5.54776	4.15721	6.15456	3.92593	4.96567	4.59726	6.24795	4.06063	7.19851	5.10108	4.21151	3.92336	4.04443	4.48678	6.51604	5.15588	3.96013	5.27757	3.9028	5.85614	3.99472	5.6029
LINC00472	6.28059	3.52629	6.19166	4.19141	4.56651	5.12287	5.82641	4.60834	4.7669	5.16297	5.0312	5.76524	7.30656	7.47266	5.91395	4.62716	4.54562	5.32733	4.17117	4.30108	4.7239	4.72622	4.48597	6.85818	4.45711	4.76978	5.19836	6.09902	4.72876	4.82693	4.77585	4.7729	4.95555	6.30227	3.68526	8.00696	5.06363	5.76641	4.26201	5.18557	4.29365	4.3275	4.8316	4.04894	3.67118	4.00934	6.8668	6.1541	4.78189
SLCO4C1	6.52083	3.66513	5.29435	3.22973	6.81945	6.59223	5.33632	5.2064	6.22651	6.71799	6.46281	6.35009	3.88758	6.70959	7.62973	7.30728	3.31335	6.03057	3.7704	5.41889	5.27207	5.03014	6.46041	6.79086	5.5148	5.79036	4.75496	6.12852	6.89809	7.09394	5.71074	5.97141	7.34955	6.79535	4.85833	6.19393	5.38144	6.64818	5.75661	5.95503	4.5562	3.53069	6.44918	4.58846	3.26112	5.52313	5.88075	5.95728	6.10831
HIST1H4H	7.37537	4.43168	8.1309	4.36613	5.67072	5.46078	4.30915	6.26707	3.92894	6.15868	5.32393	5.23187	3.94765	4.30067	4.17928	5.0986	5.35401	4.80278	4.7419	4.1018	4.87003	4.06003	4.97088	7.70211	4.99805	6.76184	7.2234	4.75601	5.78238	3.63773	4.67416	4.90206	6.78294	5.12861	4.19141	4.82984	5.25818	4.81254	4.66108	4.31035	3.68362	7.81504	5.31029	4.47626	5.76181	5.30627	5.16098	7.41064	5.94502
IBSP	3.79127	4.19891	4.36292	8.42462	4.32237	4.07113	4.04381	5.76784	5.46877	3.91286	4.07833	4.04381	4.37741	4.3371	3.91396	4.20728	5.13962	5.40046	5.71458	5.1822	4.92835	4.48073	4.5097	4.06404	4.43699	4.45532	4.17607	4.19141	4.67981	4.17428	4.40826	3.90866	4.14043	4.01853	4.2035	3.86741	4.69142	4.33322	5.31358	4.23939	4.26137	4.05546	4.02161	4.79321	4.6654	5.58407	4.2369	3.99594	4.08345
ELTD1	8.31796	7.14341	7.20916	8.85484	9.30663	8.99102	7.79026	8.08353	9.99111	10.0611	7.5088	9.67925	6.51798	5.7112	9.41134	7.55165	6.34566	10.0331	6.69892	8.92818	8.93653	9.82217	7.41586	5.47617	10.4375	8.52938	7.03951	9.16396	8.38502	5.02516	10.1082	10.0221	7.18567	8.92818	10.0446	8.23967	9.86722	9.28676	7.8222	9.43993	8.27342	7.68229	8.72136	7.84754	9.32813	8.50162	6.32452	6.9101	9.07714
NME5	7.75539	4.98925	7.30361	6.39316	8.34494	8.088	6.83552	5.53612	7.10374	5.19376	4.55075	7.05069	5.47896	8.67599	7.74107	7.79788	5.9462	7.44122	5.71026	6.97968	7.43135	7.43966	5.24622	7.67321	6.53467	4.91627	6.39405	7.30888	7.68793	8.53005	7.04282	6.61114	7.48159	7.55294	5.25072	7.8265	6.1541	8.10291	7.31015	6.3397	6.49176	4.32037	6.12373	4.65218	4.02858	7.9652	7.70642	7.8669	8.36134
LRCH2	3.80244	3.59846	4.3369	5.46078	4.38282	5.01141	5.56747	4.3359	4.60421	4.84588	3.88782	5.22147	6.12034	5.59256	4.1086	4.45064	4.3786	4.92416	3.76741	3.71313	4.47218	3.81928	6.76726	5.92502	5.25529	4.52113	3.77288	4.98509	4.27745	3.61881	5.43273	5.54776	3.66909	4.59213	4.00699	5.47663	5.16408	4.54661	4.50485	4.27971	5.28985	3.62095	4.11302	4.15781	5.79346	3.60257	6.95659	3.32002	4.04993
MN1	6.03576	4.56895	6.08616	6.61199	5.33743	5.7951	4.73299	4.89503	5.77371	4.66436	6.85818	5.34795	4.07173	3.84446	6.66965	4.14777	5.78652	5.32686	4.35117	5.13381	5.24344	5.77371	5.29007	3.9399	6.91829	4.96567	4.90904	5.79438	5.47233	3.97185	4.7171	4.87334	5.20863	5.62331	5.28985	4.82448	5.78334	5.95451	5.2232	5.65671	6.69339	4.23057	4.75496	4.68581	6.28626	5.91494	4.17889	4.57201	5.59256
ERAP2	3.72835	3.80199	6.49593	5.63128	6.25168	5.88945	5.21132	6.74027	4.13008	4.24154	6.45766	6.07302	3.86891	3.66466	6.13811	5.08192	6.48011	6.08171	6.64274	5.91025	5.94595	4.86833	3.8162	5.55577	6.39678	5.65954	5.20403	6.58171	4.65764	5.18374	6.06703	5.6861	4.45373	5.68733	3.83705	6.04386	6.24185	5.83379	5.7281	5.95606	5.38717	6.8864	3.96929	6.54427	5.90317	4.44387	5.34385	6.74453	4.92534
MACROD2	4.27802	4.22248	4.30774	6.74298	7.45824	4.51836	4.68952	5.26408	4.41093	4.4392	6.96926	4.3017	5.37221	5.01056	4.80298	5.50038	6.97216	4.829	3.85774	4.74584	6.31651	5.17084	3.85709	4.92032	4.29564	4.11501	6.45323	4.90818	4.57305	5.18512	4.25303	4.14202	7.05814	4.24415	4.08911	5.08169	4.23079	4.31449	5.2321	4.46909	5.40344	3.58082	4.3155	6.11602	4.2031	6.78903	4.54133	3.89107	4.27351
TFEC	5.32464	4.47871	4.6939	4.50728	6.30912	6.27328	4.87355	5.14225	5.03511	6.704	7.32645	6.02068	3.62576	3.54703	6.83244	5.75377	4.3521	5.81293	6.06805	5.06119	4.00147	4.82819	4.48498	3.97523	5.47595	5.2033	5.79921	5.61288	5.73196	5.32393	5.69517	4.80256	6.13915	5.82895	3.79591	4.19992	5.36501	5.84612	4.71292	5.70516	3.91075	4.65723	6.06629	5.79801	4.675	5.91893	4.19442	6.26031	6.08591
FRZB	6.48096	4.53779	5.60507	6.43899	6.37748	6.69863	5.95137	5.61242	5.80164	6.27797	4.93775	7.01664	4.77125	4.77	6.03966	5.5456	4.97804	6.63961	5.10971	6.09552	6.00307	5.99056	7.19352	5.36047	6.82886	6.72837	4.47852	6.84909	5.40298	4.8063	7.13685	6.3528	6.94106	6.16257	7.42081	5.9177	6.72866	6.3748	5.94085	6.11231	6.54985	4.29642	5.69368	5.25798	4.24154	5.63289	6.00036	5.0727	5.74446
CNN1	7.24812	7.39412	7.32377	6.21955	6.14291	8.33866	7.71901	6.13303	6.79385	6.01239	5.95208	7.51036	6.37943	5.75616	5.71287	5.70725	5.95137	7.10142	6.72744	8.42462	6.47025	6.8594	6.63616	5.06075	7.05446	7.14893	5.87414	9.13323	7.668	5.62049	7.43599	8.20405	5.60888	7.19738	7.77601	8.35748	8.77715	6.34701	8.31432	6.84846	11.3274	6.72594	5.65175	5.54219	4.84568	6.88457	5.30647	5.20215	6.23243
IFI44L	6.24264	6.20813	7.35298	5.98137	7.8621	8.0945	6.97837	9.87103	7.89714	8.02912	6.97837	9.68792	6.22883	5.54823	9.35458	8.43196	7.5226	7.46074	9.66226	7.4011	4.88084	8.73492	6.92026	7.87637	8.06327	9.49392	10.4102	8.5352	8.3242	6.56477	7.86	7.86976	7.72975	7.9034	8.50012	8.53734	9.58356	9.78972	8.91024	9.8046	8.63617	7.58006	8.53734	9.46208	8.54804	6.42668	6.41513	9.3079	8.20821
NR3C2	7.32791	5.18977	5.58058	6.53881	5.54325	6.79508	8.80828	5.18775	6.09454	7.33549	5.22502	7.03217	9.96492	8.07143	7.27605	5.92359	4.7256	6.81126	4.54781	6.02068	6.10282	5.40254	5.91152	6.76044	7.30656	7.28593	5.13781	7.56827	4.90019	6.98165	6.64676	5.28718	4.56376	7.00614	6.07674	8.66511	6.73306	7.22006	5.20685	6.75174	6.57636	4.16286	6.46065	4.70003	4.69162	5.36594	6.86865	4.76105	6.39892
PLG	4.48358	4.51406	4.49268	4.35752	4.36752	7.09796	6.12524	4.56651	4.68062	4.48401	4.2689	4.55075	4.4457	4.76169	6.0202	4.13659	4.4237	6.99977	4.40477	4.3585	4.54256	4.28071	4.263	4.40642	4.30875	4.2648	4.2715	5.24689	5.26724	4.37762	6.1726	5.29415	4.6044	7.46639	4.78895	5.963	4.715	4.29583	4.17428	5.53821	4.29662	4.29114	4.36008	4.66918	4.3373	4.33509	4.38083	4.37501	4.88395
MS4A1	4.05386	4.06161	4.36832	3.88889	3.63845	5.32573	4.26159	6.75384	4.27253	3.97543	3.88694	5.0768	3.79571	3.71963	4.0208	6.12956	3.98256	4.68972	4.1152	5.74687	3.88145	5.06815	3.74396	4.02264	3.83507	3.92148	5.61334	5.12328	4.07053	3.86416	4.19605	4.08891	3.85583	3.90466	4.32237	4.18132	4.61655	4.02836	5.00969	4.25808	4.46185	4.23369	3.84111	4.81674	3.88145	3.825	4.03919	5.08604	4.48299
AQP1	10.5966	7.62393	8.85947	8.03128	8.23849	10.6462	9.53217	6.56621	10.3098	11.7986	6.79444	11.1871	7.50957	6.23269	9.92522	7.74932	6.27113	10.3863	6.08494	8.503	7.24628	9.47068	8.90421	5.80858	9.66226	6.67608	7.79262	10.7835	9.4835	12.0457	10.7758	10.8594	6.43705	11.3345	10.816	11.217	9.36122	11.4638	8.05695	10.4073	9.30909	6.73276	11.5212	7.49625	7.11536	8.62276	6.79475	10.3237	10.7715
IGLV1-44	5.5869	7.33438	6.49676	6.88048	5.12687	6.82069	6.47248	9.39461	5.7985	5.18022	7.06019	6.72504	5.35954	7.3945	4.92242	9.54276	5.62494	5.69875	6.63673	7.4912	5.43606	7.30693	5.68635	5.4676	5.40984	5.15656	10.635	6.05255	6.99649	6.09243	5.89846	6.21902	6.45709	5.77468	6.74298	5.75259	6.54845	5.58102	7.71946	6.41732	6.72563	7.04407	5.90678	7.74752	5.38329	5.59962	6.44211	6.21902	5.93542
HSPA2	7.68184	7.83126	7.42503	7.20666	7.55248	7.69505	7.97942	7.29833	8.73978	5.87832	5.90656	6.5513	8.47042	6.6685	6.40432	5.95184	6.12956	6.90376	5.74446	7.58046	7.84891	7.05786	7.37196	9.54431	8.12695	7.07462	6.85159	8.07088	5.56089	4.63066	7.10374	6.84816	6.76726	8.59337	6.39704	11.5988	8.0747	6.80522	7.50394	7.46522	8.25094	5.78991	5.8564	6.66472	6.90621	6.58624	8.17538	5.50685	6.62583
INHBA	5.11411	5.68759	6.53021	6.54597	5.76111	6.94733	6.11352	7.01113	6.40621	5.74563	5.07701	6.16329	5.71839	4.31112	5.83428	4.46205	5.84075	5.9039	6.68986	6.9367	6.56856	6.10634	6.12524	4.47929	6.79842	7.51646	5.28403	6.7037	6.7923	4.46343	6.37616	6.32735	4.84042	5.41301	7.2095	5.83303	7.55	6.05079	7.37421	5.69852	7.48429	5.58309	4.84066	7.58833	7.04865	5.73196	5.3076	4.12015	4.87148
PRSS35	3.18408	3.50099	3.64326	3.6094	3.60769	3.96291	3.33787	3.26414	4.06201	3.77062	3.14905	3.62479	3.26342	5.12097	3.51378	3.57703	3.16008	3.8162	3.20815	3.74962	3.78878	4.72809	3.67746	8.83321	4.76978	3.62244	4.19625	3.98761	3.19315	3.58679	4.39634	3.51788	3.51088	4.15903	3.93948	5.63635	4.57364	3.51974	3.66748	3.49594	4.20292	3.11641	3.37936	3.27729	3.17468	3.50958	3.50594	3.22073	3.54925
ZPLD1	3.38148	4.07216	3.92379	3.38907	3.26309	3.24022	3.27827	4.22188	3.28837	3.32528	3.24671	3.2108	3.24536	3.35276	3.25777	3.24194	5.35677	3.40395	3.20448	3.38469	3.18819	3.40681	3.37417	3.29607	3.14862	3.49459	6.1201	3.6698	3.9532	3.31581	3.28555	3.21815	3.187	3.32213	3.35102	3.35132	3.23142	3.27472	3.58608	3.20707	3.37936	3.44082	3.25809	6.90786	3.21849	3.17144	3.82872	3.23039	3.23321
VTCN1	4.14202	6.83988	5.27459	5.21865	4.33949	4.61318	4.35989	4.14163	4.16188	3.87566	4.20647	3.98466	4.39157	7.51892	4.15285	4.12299	4.40017	4.2369	3.91525	3.95054	4.1191	4.22188	4.2849	4.5454	4.24237	4.11199	4.11056	5.91793	4.19162	5.93403	4.15702	4.28329	4.4235	5.12032	4.30511	7.73966	4.52037	4.36674	4.4457	4.15882	5.70746	4.00913	4.01735	3.98571	3.87717	4.24017	4.35175	4.34587	4.1358
MFAP2	5.75306	10.9433	9.44806	6.6218	4.9737	5.79227	6.15634	5.87979	7.18141	5.57078	4.99311	6.26057	5.94307	5.86656	4.94246	5.44477	6.26004	6.3216	6.75922	6.37641	6.49708	5.74997	6.05006	5.2033	7.34279	5.5424	6.62638	6.31515	7.56993	4.91498	6.97968	6.39599	5.27303	5.92359	8.06327	6.91291	8.84871	6.12931	7.36013	5.22035	7.63809	5.71215	5.33885	4.99978	9.71274	6.94348	5.40644	4.94204	4.77564
TEX11	3.84292	3.82717	3.89789	4.18392	5.83184	4.05984	3.97991	4.00868	4.15944	4.53923	4.1152	3.86974	3.978	4.14797	5.07658	6.03749	4.53734	5.23453	3.81028	6.23188	3.90043	4.82673	4.09072	3.83507	4.74773	4.74773	4.88966	4.69349	5.96699	4.08726	4.39196	6.48791	3.77243	3.83485	4.21052	3.8213	4.7371	5.09754	4.89824	4.46205	4.24872	3.93136	6.9167	3.83683	3.94617	5.0469	3.92208	7.4888	6.67844
RP11-389C8.2	7.69101	6.14973	6.06109	6.8955	7.41266	7.8069	6.69628	5.42022	8.20755	7.54798	5.59137	7.66281	5.06714	4.41314	7.41969	6.24669	4.25263	8.5023	4.72189	7.62929	6.7037	7.99091	5.67546	4.49576	8.35047	6.57106	5.62469	7.5108	6.34566	4.32687	8.02124	8.43925	5.59845	7.48237	8.22176	6.99451	7.43013	7.46714	5.82096	7.55889	6.0149	4.65864	7.07931	6.00729	6.97803	6.13006	5.33159	5.69155	7.22083
CD8A	6.52496	9.42856	6.33886	5.74106	6.08863	7.04438	6.3309	8.01941	8.07415	5.67523	7.86157	9.38724	5.43473	6.86744	8.38251	8.01222	7.59599	6.78114	7.62088	8.86293	5.09267	9.65389	5.26676	6.35765	6.17908	5.51946	8.57494	7.68229	9.20233	5.81293	6.226	5.64948	6.32843	6.08321	7.39915	6.34346	7.70687	5.86114	8.46654	9.10448	7.11169	9.41417	5.89137	11.1638	6.1796	5.86376	7.82796	10.5566	8.5444
SCNN1G	3.76946	4.29942	3.77515	7.41104	3.7442	3.81094	3.60353	5.87953	3.63892	3.74305	3.60353	3.79745	3.57481	3.42993	3.73891	4.08588	3.89346	3.89621	3.6956	3.78746	7.52176	3.65688	5.43338	3.62412	3.69514	3.93565	3.86847	5.55156	4.36613	3.58291	3.96619	3.99555	3.66771	5.84972	3.93498	7.05004	3.85303	3.79106	4.37881	3.90043	4.67824	4.77693	3.65352	3.67048	3.84685	3.78834	3.84815	3.81028	3.62003
RAD51AP1	4.53779	6.30254	6.95045	5.21778	6.64017	6.08446	4.91757	6.50612	5.66333	5.52481	6.21621	5.71479	4.71669	4.00934	5.73628	5.96868	5.5975	5.76448	6.26321	5.1517	5.08147	4.70024	5.74396	5.05163	5.65622	5.35586	7.64036	4.93863	6.0802	3.99178	5.1912	4.16064	5.58668	5.03554	3.83043	4.15183	5.38077	4.69731	6.27198	5.08386	4.29921	6.72657	5.32953	7.15431	5.94208	5.88945	4.48822	5.86398	5.0084
XK	5.6308	4.42409	4.31896	4.39236	4.44347	3.41781	3.46436	4.22537	3.2802	3.25473	3.36544	3.11818	3.32304	4.28634	3.8891	4.25151	3.56539	4.89268	3.19808	3.69774	5.51879	3.48666	4.09952	3.32213	3.24942	3.20146	4.15264	3.90757	3.9378	3.4161	3.34152	3.35677	6.91572	3.6159	3.27764	4.91586	3.42043	3.14077	4.35712	3.28057	4.48217	3.50441	3.19956	3.8646	3.83311	3.80244	3.92105	3.70315	5.13072
TTLL6	4.57656	4.43962	5.70906	7.85713	8.14119	4.7175	4.95444	5.21949	6.17368	4.51472	4.95311	4.531	6.71358	8.41232	5.88564	5.30199	5.05578	4.88105	4.94477	4.96371	6.43373	8.21883	6.20223	7.60419	5.08561	5.43382	6.60112	4.98421	5.12287	5.95628	6.58624	5.13671	7.98827	5.00348	5.69392	4.83557	4.58846	5.15947	5.48494	5.56889	6.17832	5.40759	5.60461	5.32619	4.11992	5.60908	7.62929	5.93227	4.99936
RP4-680D5.8	3.86507	3.82784	3.62146	5.03099	4.71669	5.15276	4.17968	3.47098	3.72493	6.25378	3.63404	4.94477	3.69357	3.65449	5.72786	4.48901	3.27922	4.76356	3.71941	4.72744	4.92903	4.04104	5.03057	4.52535	4.05567	4.99805	4.28755	5.10971	4.25703	3.79355	4.70065	4.7225	5.07616	5.37221	3.91034	4.42449	3.99099	5.26724	4.3879	4.54153	3.60353	4.36352	6.55557	3.58869	3.63964	4.00205	3.60503	5.26027	5.69517
RSPO3	4.90266	5.21284	6.21104	4.68846	4.41668	6.34482	8.15207	4.52216	4.99936	4.06569	4.11749	5.86228	7.07862	4.24274	4.87355	4.26929	4.06635	5.86536	4.81026	6.31463	4.3875	5.48245	4.2031	3.90171	4.93054	4.31409	4.46604	5.56588	5.64568	3.83065	5.15233	4.46562	4.26607	5.26724	4.58927	6.84359	5.89377	4.19038	5.72566	5.52985	6.04066	5.65249	4.62118	4.77165	7.38264	4.49205	5.98159	3.97062	4.92076
BEX2	10.7835	7.25733	6.51883	7.08502	9.4592	9.97349	9.95625	6.98458	6.55471	7.44361	6.59909	9.57711	9.99552	10.4253	9.07822	8.58077	8.46177	9.58829	7.486	9.41681	9.15946	8.56351	10.628	9.41282	5.91746	7.94971	8.24367	8.71497	8.18826	9.19653	9.9229	6.07504	6.66906	10.1223	8.83665	10.0069	7.85953	9.94	9.63395	7.54058	6.7406	6.12653	5.49715	7.0888	5.39818	8.33098	8.78388	7.20031	9.45786
GTF2H2B	5.09575	4.67802	5.55252	6.35033	6.86931	6.74271	6.0645	5.73026	6.14921	6.78839	8.451	7.28739	5.74396	5.27459	8.90145	7.08983	7.43211	8.12413	6.14674	6.51911	8.30307	6.51351	7.25005	5.46619	7.07695	6.44918	6.10081	6.1967	7.28808	8.06589	7.72355	6.87026	6.39973	5.83958	7.01403	7.17895	6.73581	7.00542	7.05849	7.25845	6.44291	7.09087	6.84909	7.61822	7.50917	6.69835	6.72147	6.59427	6.88797
NKG7	7.23011	9.73566	6.03182	5.83688	5.72566	6.90721	6.10205	7.77371	7.19143	6.19875	7.35976	8.84709	4.58174	6.15156	7.05786	7.39875	7.16657	6.42355	6.88138	7.79026	5.51244	8.03989	5.37666	5.73219	6.63527	5.78605	8.45989	7.20179	8.87247	5.35608	6.74515	5.81696	5.98266	6.26552	6.77873	5.66622	7.60114	5.99832	8.20463	8.28188	5.88782	9.29778	6.41483	10.6462	5.77371	6.27693	6.62903	10.2453	8.76575
CDH1	6.91543	6.18989	6.93196	9.38041	7.75824	8.2932	8.95248	6.42777	6.18163	6.65048	6.56071	7.20458	9.06233	5.58286	6.60888	6.56856	7.15708	6.87084	3.97714	5.82165	8.551	6.06551	8.36965	5.84196	6.36464	6.80908	6.83897	7.8518	7.39343	5.82263	6.4238	6.76419	5.45084	8.65191	5.85949	9.44121	6.06985	7.31698	7.55889	6.71297	7.42972	5.2471	7.38604	4.88252	3.68777	8.1423	10.2714	8.71027	7.26112
CCL2	8.43326	10.0935	9.63395	8.98614	6.86004	8.49119	7.43966	9.78076	9.67269	11.873	7.44361	9.9338	6.60025	10.7091	7.87983	9.22482	8.72605	6.43156	9.12767	6.25301	7.82023	8.02484	9.55207	10.3752	8.49048	11.4111	10.9755	9.51856	8.90057	6.59909	10.2187	10.6897	5.94695	8.74389	8.27466	10.8977	10.0288	9.4835	10.5863	6.68596	9.41814	6.99614	11.998	8.38704	6.12524	7.07257	8.21578	6.68044	7.85612
WDR72	5.45987	4.28874	4.57699	4.65093	4.87954	6.80466	6.89871	3.69892	4.75454	6.85003	4.79145	5.98266	7.28476	6.034	6.79385	5.52198	4.38812	6.67312	3.90466	5.67587	4.48881	5.44926	6.62123	9.20925	5.48057	6.03749	5.57406	6.39946	5.9516	6.30094	6.21027	5.926	7.11407	7.38155	6.25779	6.87407	5.34407	6.23773	4.03634	5.77609	4.53716	3.83507	6.65781	4.51014	3.90191	4.31693	6.36084	6.05538	6.392
KIT	7.46561	6.39119	6.51066	6.97705	7.90024	8.09679	11.0937	5.37508	7.76095	7.41586	6.14191	7.76731	11.7413	8.70081	6.13254	6.598	6.26371	7.54141	5.74279	6.49851	7.17018	6.22212	5.64286	4.4496	9.29892	7.40797	5.73097	7.88434	7.65593	5.84848	8.15038	7.17964	8.12924	7.39953	8.83836	8.80149	9.17963	7.38491	6.70636	6.90501	7.53852	5.86443	5.88564	6.10609	8.35552	6.24748	8.27585	5.25594	6.13637
TFPI	5.90317	5.20934	10.5049	7.92543	7.37196	7.3629	6.07378	7.5817	7.50917	7.60888	6.9167	6.93796	4.21191	3.77694	7.11536	7.49836	8.12695	8.04618	5.07095	5.12267	8.00314	6.2996	6.7221	7.84609	7.97885	8.09562	8.08742	7.5088	6.57052	6.76965	8.6124	7.41312	7.75075	7.48719	7.63723	7.19923	6.91323	7.01599	5.76641	7.3219	5.74711	10.0001	8.3639	6.05927	7.30624	6.46224	6.8795	3.89536	6.8213
RP11-222K16.1	5.32118	4.11056	4.47833	4.28272	6.48984	5.07181	4.3689	6.76154	4.28793	5.46596	4.60254	5.70018	4.50184	5.30985	5.53503	6.68131	4.54234	5.16075	4.67963	7.14928	5.07785	6.50811	5.36292	4.33509	4.74459	4.29603	4.64294	6.32398	6.89579	4.53965	5.46477	4.38812	6.01809	5.82613	4.82693	5.25407	5.51364	7.02048	5.84492	5.88222	6.11578	4.63378	5.38717	5.09039	4.39474	4.71792	3.75545	6.16684	7.12937
LY75	6.49344	6.81187	6.30626	7.71257	7.8669	7.94402	6.26476	7.90024	6.78991	6.81451	6.86433	7.19069	3.47471	4.60106	6.68044	8.03497	6.08785	7.77233	7.28845	8.08072	7.21281	8.24084	6.06109	5.4552	7.23339	6.31069	7.33934	7.10073	8.36328	8.93182	7.23985	6.25301	5.01396	7.15333	4.97284	7.62661	7.73923	6.27042	8.4557	7.2548	7.68138	9.55822	6.50188	8.33672	6.75028	7.8683	5.35797	8.1647	7.21794
CHI3L2	4.71169	5.94968	7.20771	4.77895	4.934	4.4848	4.77693	5.85567	4.98553	4.36493	6.39316	4.66271	4.41072	4.31674	4.19542	6.0847	5.50086	4.73986	5.23995	5.58599	4.88372	4.85897	7.95121	5.48846	4.65622	8.38122	6.1487	4.46767	5.69204	6.20435	4.47626	4.5603	8.44264	4.17345	4.79239	4.23732	4.89075	4.80609	6.93126	4.24293	4.57888	4.74968	4.46686	5.47374	5.66286	6.51969	6.96192	7.4571	5.16387
KCNK3	7.29097	5.78674	5.11675	7.5108	8.05799	6.47541	5.91847	5.44404	6.93257	8.59851	9.18421	7.56098	4.91221	5.40964	7.72083	7.37076	5.20775	7.90024	10.2936	6.78206	7.63632	6.10179	6.98032	4.97847	6.89809	7.92343	5.88249	7.0248	5.67024	5.10219	8.07797	8.87508	9.13952	7.97001	7.486	5.9384	7.30728	8.29749	7.12303	8.68373	7.00439	4.8916	7.75955	5.77781	5.1601	7.84754	4.86833	5.33276	5.90245
SMTNL2	7.79262	4.98596	4.69452	4.81803	6.10231	7.61357	6.55015	4.60482	5.01993	7.41183	5.25025	6.92312	4.67885	6.77209	7.49921	5.71313	6.42914	6.61951	4.72331	7.01242	5.255	6.92508	6.20396	8.60641	6.87084	6.20223	6.32735	6.71232	7.24593	8.74617	5.88295	5.56446	7.1021	7.30478	6.86807	7.45275	4.92395	7.55889	5.61313	6.81363	4.70444	4.95288	7.4432	5.21754	4.6729	6.10958	7.58791	7.44786	7.17392
BAMBI	7.92949	7.63183	8.09787	8.09502	5.84686	6.49933	8.00955	5.77445	5.70701	7.76996	7.03722	7.66621	6.16585	6.16129	8.82179	6.8864	9.54753	8.00107	5.20955	6.36601	8.2661	7.35492	7.80178	9.37348	5.9142	7.21462	5.42232	7.51646	6.58537	9.08374	6.44315	7.33511	4.71813	8.51143	6.61401	7.83126	6.7509	9.04204	6.18393	7.80083	8.9679	5.77979	6.19342	4.65152	6.83865	6.56799	9.91873	8.72932	8.25094
ACSS3	6.50188	4.78769	6.41923	7.07257	7.22866	7.10476	9.2719	5.08973	6.38988	4.94286	3.93396	7.3432	9.95444	7.26078	6.68245	7.4892	4.13276	7.20387	4.45792	5.72908	7.11882	6.15766	5.80833	7.85905	5.41005	6.37213	4.12986	6.4524	6.63701	7.84453	6.10231	5.04477	7.17087	7.20031	4.74047	7.2474	6.76758	6.37861	5.51292	6.92989	6.78778	4.45917	4.60482	5.21802	4.6476	5.32254	8.17113	4.91607	7.02117
ABCC2	6.68925	4.17889	8.75518	4.81275	7.55206	6.87026	5.81122	4.36851	5.36179	6.7923	7.8669	5.86605	4.1066	4.51531	6.55753	7.35108	7.32533	6.09502	7.07862	6.47761	5.28226	4.76398	7.67198	4.19542	5.30085	6.05464	7.18959	6.32951	7.19527	5.53339	6.59043	5.8352	6.82006	6.00156	6.1201	4.47366	5.52088	6.5553	6.50811	6.62583	5.04752	9.29651	6.58848	5.04838	4.30613	7.02217	4.42088	6.71145	7.23917
GABRP	3.65882	5.0161	5.75544	3.67541	3.66396	6.01953	4.63025	3.57016	3.64656	3.27859	3.61614	3.58783	4.49495	3.68919	3.51189	4.04914	3.3352	3.45658	3.67048	3.62531	3.52755	3.91613	4.17159	3.38907	3.64137	3.39337	3.61059	4.20073	3.66466	3.67425	3.63073	3.50643	3.3489	3.99391	3.69059	7.63994	5.90367	3.60625	5.5029	3.51189	7.31243	3.44891	3.66466	3.70943	3.59772	3.65279	3.50772	6.07302	3.7577
PRSS16	8.58303	4.99892	5.59232	7.44008	7.12451	6.35712	6.52631	6.0095	5.56889	6.49958	4.34648	6.52111	6.32213	4.35311	6.67959	6.27797	7.0369	6.31198	5.8432	5.91622	7.8284	6.69513	3.78547	5.65319	4.38242	3.83217	5.19993	5.92865	5.50381	6.44725	6.84972	4.02901	6.90951	6.507	5.51016	6.49958	6.81637	5.61404	6.34429	6.44673	5.44773	5.07935	4.10222	5.48245	3.90259	6.18065	3.85199	5.73674	7.12379
PTGS1	5.83327	6.14621	6.97151	9.9933	7.45513	9.33475	8.10568	6.22626	6.7102	5.87205	6.81573	6.00506	5.38579	6.42061	5.5893	6.9082	6.63294	6.50188	9.48929	7.0014	9.61402	6.9438	9.05507	5.9438	6.55838	7.27821	6.61372	9.10892	6.54288	5.2259	8.17888	5.94502	9.99765	6.38379	6.54081	7.34511	6.61433	5.99611	7.51277	6.28473	6.09979	5.43108	5.94822	6.78631	6.44645	7.03084	5.35977	8.2194	6.46665
SLC26A7	3.39507	3.16734	3.41897	3.49063	3.27986	3.32065	6.70991	3.37821	3.34152	3.15078	3.18974	3.22433	8.38958	3.31178	3.39309	3.52284	3.31849	3.65352	3.50413	3.34774	3.75329	3.35766	3.34355	4.0818	3.25276	3.20109	3.41811	4.79985	3.75233	3.26577	3.38814	3.16616	3.35796	4.33569	3.26043	5.55953	3.32643	3.25344	3.3489	3.26708	3.5679	3.21488	3.20181	3.48212	3.27729	3.32036	3.25111	3.22831	3.17941
FSIP2	2.95759	3.02059	4.10477	3.15965	3.12289	3.12894	3.0354	3.12148	3.06271	3.34833	3.29949	5.29659	3.12943	3.17978	3.55607	3.3942	3.28837	3.19695	2.95169	3.29546	3.38935	6.41679	3.12798	3.20596	3.18176	3.16495	3.31458	3.4519	3.92996	3.10385	3.34653	4.28426	3.33103	4.84272	3.23949	3.68896	3.32706	3.36312	3.17544	3.48212	3.33247	3.26378	3.06508	3.5072	3.14116	2.96778	3.40114	3.18742	3.06046
IP6K3	6.27198	4.00995	5.85044	4.7076	4.16562	4.00953	4.02058	3.75055	4.73234	5.44106	7.70075	4.96671	3.9468	5.89499	7.61906	4.8015	4.10955	5.16297	5.52915	4.55843	4.1072	4.40562	4.5312	4.77585	5.97581	3.99472	5.61814	5.59606	4.65343	4.73813	6.15026	6.63557	4.51098	6.53548	4.51856	4.80774	3.80437	6.04361	4.22555	6.61522	4.26522	4.05448	5.25319	4.42758	4.90496	4.20909	8.35552	3.83151	4.30711
PPP1R14C	8.19708	6.19271	7.38715	4.52678	6.9932	5.96376	5.04456	6.76097	6.23346	7.18321	8.25212	7.52052	5.02863	6.22806	7.20594	8.99991	7.04696	8.68992	7.78785	5.5255	4.34891	4.69162	6.2785	4.7423	6.13059	5.13488	6.07205	6.65222	6.507	9.69456	5.07957	7.86052	8.26252	6.50412	4.74436	7.33587	6.36412	7.64518	6.50953	6.96285	5.04161	4.64376	5.6431	7.19704	5.56138	7.38454	6.65367	5.82312	7.65552
S100A1	8.06919	6.50046	5.83327	6.63644	7.25149	5.63974	5.76205	5.52847	6.71537	5.51292	7.42893	5.7157	5.94008	6.58315	5.4139	8.75683	7.04079	5.88272	6.33299	7.02808	9.17608	8.2944	5.9787	8.48848	6.62093	7.41931	6.58057	6.2009	8.50588	7.77885	6.15714	6.52908	8.89787	6.65313	6.64935	6.99285	7.42313	7.59727	9.17281	7.63097	6.43458	5.86376	7.76996	8.16302	5.58407	7.45234	9.95233	9.41417	11.2823
EVA1C	7.05004	6.533	5.70259	7.80735	7.42081	6.98743	5.75146	6.54763	6.5691	7.65381	4.00913	7.58419	3.87167	5.90222	7.79262	6.68743	4.62279	8.75185	5.91746	8.93565	8.05091	8.30981	7.19527	4.08469	7.7157	7.92294	6.84237	7.76052	7.73287	5.24846	7.92193	9.84738	8.15785	8.26976	7.49606	7.56225	7.1301	7.53975	9.18421	8.26197	7.37157	4.57971	7.40451	5.96454	5.13467	7.62487	5.48733	8.18238	7.08169
NTS	5.97945	3.7458	3.58291	5.66054	3.81136	3.62506	3.70033	3.56487	6.14843	3.74556	3.59772	4.02643	3.82153	3.8081	4.20232	4.19141	3.66371	4.73517	3.63284	3.50255	3.45522	5.25944	4.63708	3.68942	3.98823	3.38617	4.3523	3.83194	4.82859	3.68777	6.62469	3.79955	4.76085	4.49268	3.71032	7.52469	4.31773	3.74985	4.85592	7.60586	5.84686	3.59024	4.20467	4.3555	3.91958	4.32503	3.64491	4.3477	6.49796
GPNMB	8.63987	9.41417	7.8426	9.13753	9.48203	9.31786	11.7872	7.38604	8.34809	8.30242	9.82217	7.79502	11.7629	10.2318	7.20563	8.11781	9.09082	8.75442	8.95061	10.378	8.39224	9.13858	7.13148	11.6864	10.5566	8.90753	9.86906	8.25155	10.0001	9.95877	9.27323	6.19089	9.17394	8.20697	7.45555	7.79647	9.82009	5.75022	8.19113	8.95638	7.8426	7.36668	7.89123	9.18538	9.5818	9.56293	12.5443	6.70457	9.2318
TNNT1	4.78456	7.18212	4.97692	4.55294	4.39853	4.69963	4.84424	4.74481	4.79985	4.86704	5.27279	4.79526	5.01375	4.72017	4.60146	4.88794	7.28772	4.79718	5.5588	4.65494	4.53558	4.69183	4.72962	5.12245	4.78169	4.73945	7.67538	4.67247	4.76127	5.07355	4.67395	4.85291	8.18587	4.77498	5.4313	4.58966	4.7225	4.73668	6.95727	4.84927	5.21089	7.74192	4.94971	7.5986	4.96931	5.43561	4.90123	4.57364	4.87089
FLJ16734	4.54948	4.03248	4.41134	5.28985	5.19601	5.39681	4.53162	6.39513	5.87929	5.9167	6.71328	4.32647	5.95388	4.81275	7.18639	6.59543	4.41511	5.89846	5.57665	4.20429	6.47788	6.97338	4.59525	5.04243	5.00107	5.19709	5.28924	4.66333	5.91226	5.59894	5.09994	4.63811	5.12574	4.91395	4.49639	4.04059	4.2156	4.5607	5.38579	5.33183	5.78721	5.80663	4.67001	4.95399	4.51346	4.82239	4.72039	4.59463	5.33864
LOC101927972	6.17706	3.29642	4.00045	4.6958	5.35514	3.44665	3.19315	4.10158	4.36252	5.28626	3.42774	3.98864	3.41872	3.42043	4.05928	4.32318	3.32153	4.9549	3.27337	5.20775	5.12462	3.3256	4.90246	3.35707	4.18917	5.65105	4.08829	4.30814	4.95964	5.80783	4.24094	4.64721	3.31789	4.01156	3.94533	3.56691	4.87762	4.93336	5.54348	4.30396	3.535	3.36101	5.14571	3.61564	3.46985	5.52455	3.38964	5.46102	5.15541
FAM110C	9.71274	7.03182	8.01449	8.54804	8.96315	8.82856	7.41623	7.11504	8.55764	10.3956	5.44429	10.2211	4.71169	10.7475	10.1512	9.53817	9.09296	10.0091	8.69135	8.74145	8.39601	8.81421	10.1198	6.71203	8.44264	10.2797	8.08017	10.0264	8.53805	8.22113	9.7213	9.82009	10.9519	10.0244	8.84538	9.53817	8.35047	10.6462	9.26711	10.621	8.29935	6.35061	10.4253	5.37641	3.55053	8.41944	7.18567	8.9622	9.30272
UCHL1	5.79777	5.64546	7.61401	5.50133	5.74563	5.40024	6.47108	5.62938	5.42968	4.73299	5.23904	4.87482	5.4395	8.69531	4.65622	5.85833	5.14857	5.25986	7.40722	6.14117	5.27888	5.1214	6.27955	7.68835	5.25754	5.0144	8.48353	6.56217	7.0548	6.99682	5.18265	5.48127	7.23658	5.78215	5.50685	6.94076	5.42258	5.55397	7.80317	5.35933	5.99784	8.16243	4.92835	7.10992	6.39093	6.95465	5.90757	4.69963	6.31969
CDH16	8.05361	6.88953	5.90731	8.48353	9.53217	8.60997	9.9933	5.26477	6.56217	9.30405	5.67663	8.79138	6.14745	11.6864	8.80742	6.89809	6.8955	7.79026	7.5758	8.34615	9.85529	8.51284	9.98226	11.0096	6.47382	7.8402	6.72837	9.94621	9.71972	8.78794	6.82825	8.63541	8.34809	9.30148	8.44052	11.2107	7.99904	8.87969	8.80492	9.46345	6.8772	7.1918	8.69996	6.37213	4.85638	8.92343	8.43326	9.52928	8.54302
GLDC	6.18011	7.52958	6.09902	4.43699	7.95485	8.2194	7.03182	7.85471	5.93521	6.86931	6.9082	7.75168	4.58787	10.4224	8.47954	7.96311	5.51781	7.23153	8.83665	6.57524	6.93856	7.01503	6.82411	7.95072	6.92609	6.10004	6.22417	7.605	6.45517	9.08876	6.24366	7.74888	8.13598	8.01505	6.27588	7.90586	6.23469	6.03819	5.93021	7.68928	7.95175	5.63661	8.42328	6.76874	5.80978	7.42893	7.65632	5.43653	7.14615
CDA	5.95137	6.07846	7.10887	5.71432	7.41396	7.1372	7.85759	4.76465	6.06527	5.32485	8.8109	5.66358	6.18065	5.27348	5.52361	5.33404	5.0913	6.60262	9.86906	6.19722	6.59167	6.35198	5.14503	4.52678	6.63784	5.2321	4.97046	6.04485	5.07463	4.16979	6.49766	6.33168	4.85249	5.57968	7.41023	6.3748	5.33564	6.03475	7.24261	6.34907	5.56138	9.34943	6.124	5.12643	4.65282	9.02528	4.78499	4.81696	5.63758
PRRX1	4.56334	5.58996	5.52599	5.75215	4.56608	5.57052	4.57801	6.19647	6.68158	4.45532	4.7419	5.21397	4.27993	3.92976	3.89999	4.65723	4.99137	5.61359	5.26632	5.33698	5.47507	4.77935	4.50869	3.92336	6.21362	5.55205	4.4894	4.95923	5.56704	3.82456	5.44269	5.34066	4.34932	5.26954	5.68088	4.90692	6.75922	4.50322	5.62986	4.77541	6.20611	4.84169	4.03958	4.79924	8.43795	5.25452	4.64498	4.01796	4.68476
GZMB	6.59398	9.53217	5.17346	5.19601	5.36201	6.35143	5.10083	7.08065	6.56132	6.15077	5.49595	7.38829	4.23057	4.75539	6.21335	6.79567	6.34161	6.31999	5.43795	7.42278	5.2248	7.04376	4.70607	4.27371	6.43401	5.59092	7.96468	5.954	7.30282	4.39894	6.45436	5.90537	5.88272	5.72566	6.1773	4.86031	6.68305	5.20081	6.3528	7.39149	5.93328	8.63392	6.57052	7.97515	4.80774	5.36774	6.33009	7.29424	6.85907
HSD11B1	4.79145	7.2219	8.82271	5.31845	4.53696	5.30605	5.65249	6.99188	4.98336	4.45352	8.02208	4.96261	4.70233	4.17704	4.27111	5.20752	7.97001	4.65947	6.29741	5.97796	7.74613	4.74605	4.54992	4.52496	5.57168	6.09243	6.23188	4.88774	5.07616	4.03069	5.07076	5.7269	4.75957	5.08628	4.51202	7.63723	6.56937	4.51895	6.37641	4.58583	6.00974	5.32866	4.53224	5.94035	5.59823	5.3489	4.47424	4.68233	4.41904
IL18	5.94332	6.35033	7.24374	6.65162	5.79206	6.68017	8.11328	7.42081	5.74778	5.17688	6.88078	6.35472	8.97943	4.49944	6.21776	7.45868	9.74621	6.87249	6.1726	7.60935	4.93885	5.4601	5.05054	5.65105	7.21392	5.74778	7.01887	6.55412	6.37531	6.31785	5.86512	6.06527	5.70516	5.87904	5.68967	5.28403	6.63701	5.92476	6.58737	6.42887	5.57727	5.58599	6.66935	7.5817	4.35013	6.50131	5.76829	7.65245	6.27588
NETO2	9.01535	5.67809	5.75778	8.84013	9.64556	8.10944	7.20916	7.63274	9.20463	8.97658	5.94846	9.17859	7.32305	4.85746	9.62733	7.93142	5.15925	8.81506	9.10238	8.35678	9.35974	7.59514	6.84209	8.62649	9.11456	8.97755	8.71109	8.19005	6.81792	4.02554	9.20463	8.41686	8.30981	8.3111	8.31371	5.96454	8.78545	8.89265	7.88975	8.89346	6.62382	6.99121	8.92343	7.97001	7.96054	8.84359	4.65805	6.91962	8.64599
NMRK2	4.75216	4.72165	4.75624	4.7148	4.75475	4.8478	6.43182	4.62566	4.54661	4.28553	4.30249	4.19383	7.98619	5.61404	4.48155	4.56376	4.46868	4.34688	4.77564	4.61383	4.75957	4.79841	4.70444	5.7951	4.30006	4.24835	4.5753	4.57865	4.99783	4.75805	4.6731	4.61383	4.64925	4.72207	5.12391	4.58787	4.60482	4.70315	4.47463	4.61152	4.62985	4.70087	4.55433	4.58665	4.84424	4.63994	9.77866	4.71607	4.59808
PTH2R	4.56833	3.63454	3.69014	3.58082	4.02225	3.53094	3.34686	7.41969	3.64778	3.62048	6.09143	5.16888	3.22212	3.72052	4.01696	3.73583	6.53522	3.51658	3.60085	3.74829	3.54395	4.21131	3.8615	4.07032	3.86636	3.55901	5.96844	3.36458	3.69845	3.62531	3.63796	3.59846	3.489	3.88999	3.19432	4.14615	3.5485	4.66007	3.7713	3.59168	5.04886	3.4994	3.49119	4.21334	3.83791	3.6011	4.44529	5.19926	3.74327
KIAA1462	6.52332	5.84051	8.32049	5.50477	5.71886	6.80612	5.36179	6.87407	7.63411	6.57944	7.75168	6.91896	4.33599	4.16307	5.18687	4.85141	7.1918	6.56708	5.11214	6.03894	5.59962	5.95503	4.9948	5.67304	7.43885	5.79487	6.1043	7.21861	5.33767	4.28091	7.12023	6.39652	6.41787	6.12373	5.85903	5.42116	7.74572	7.07331	7.16731	6.01663	6.52442	4.23346	5.76948	6.30489	7.18284	5.9027	4.50952	4.36713	5.46126
LOC102725408	3.45769	3.70664	4.00188	6.58315	5.14075	3.75586	4.42212	3.61739	4.571	3.39745	3.57728	3.49802	6.40919	3.39393	3.60769	4.5574	3.65758	3.75978	3.59024	3.74168	4.48961	6.26397	5.79487	5.01883	4.22496	4.35752	3.65907	4.40886	3.64326	3.70523	5.37896	3.51505	3.47606	3.82392	3.66443	3.92725	4.0402	3.63428	4.08039	3.61929	5.79438	3.58585	3.83399	3.73679	3.55582	3.7521	4.1276	3.46462	3.99222
NDUFA4L2	11.5893	6.10179	12.7763	11.9388	12.195	9.27695	8.55537	11.3082	12.0457	11.9673	10.7393	12.1079	6.47541	6.22883	11.5123	11.48	12.0291	11.8233	11.9535	10.511	12.4537	12.5082	12.5443	5.81885	11.5466	12.0457	11.9107	12.0457	11.5988	6.02618	11.998	11.5293	11.8861	12.4902	12.2139	7.64263	12.3058	12.7177	12.3798	12.3418	10.7393	10.9294	12.2862	12.1254	7.95023	12.6006	5.70955	11.9673	12.3058
DUSP5P1	4.42172	3.7535	5.1446	3.82087	3.61451	3.64656	3.22285	3.64778	3.51635	3.74191	6.57862	4.27089	3.2757	3.3537	3.62095	3.55678	6.2996	4.17304	4.87975	3.39945	5.61727	3.60035	3.35796	3.70591	4.28954	4.65408	4.62297	3.57138	3.64778	2.99287	4.22973	3.93498	4.69162	4.11992	3.46188	3.33605	4.11056	4.08138	3.89067	4.7076	3.87081	6.48984	3.49648	4.27802	3.17225	4.23671	3.23949	3.59868	3.55777
SOX9	9.70169	7.98251	8.82358	9.41004	8.31862	7.65337	7.99857	5.83569	8.52792	10.8845	6.03228	9.1156	6.90344	10.0611	9.65549	9.23529	5.12665	8.19177	7.32867	5.03772	10.2138	9.44951	8.42134	4.55273	6.38962	6.28188	8.50162	8.86038	7.99195	10.812	6.33113	7.67413	6.44054	8.08916	7.16063	8.64057	7.38754	8.80231	9.29546	6.9777	8.63392	6.99188	10.1173	7.934	6.48096	8.40192	4.39914	9.64066	8.51424
AC002059.10	4.57137	4.54603	4.80523	4.67247	4.68457	4.46352	4.55253	4.27233	4.49205	4.62673	5.03291	4.62427	4.45611	4.83787	4.58096	4.38282	4.36812	4.51014	4.82004	4.66354	4.26137	4.829	4.0345	4.66207	4.6854	4.43758	4.2925	4.43126	4.69246	4.43474	4.45752	4.47385	4.37821	4.28673	5.34795	4.33913	4.8132	4.76876	4.37217	4.56272	4.31071	4.48559	4.36352	4.70109	4.5753	4.55391	4.71813	4.55012	4.77652
NRTN	5.90294	3.45658	3.97039	3.27795	3.42967	3.90673	3.98803	3.60695	3.75372	5.30108	3.74123	4.64965	5.12308	5.79947	6.64876	4.08851	6.03082	5.38835	3.66771	5.6407	3.55607	3.94806	4.56917	3.98654	4.50343	4.28532	3.70502	4.21985	4.8132	5.28203	4.30414	4.82515	4.55176	4.44863	4.46971	4.05726	3.94595	4.98772	4.45957	4.68829	3.6504	4.03248	4.41433	3.32065	3.56641	4.18835	4.54256	4.10897	4.31958
TTC30A	6.40051	3.87017	6.20867	5.06297	6.0572	5.46382	4.07113	5.01141	5.45987	6.02229	5.33255	5.99784	4.25766	3.92936	5.7742	6.11985	3.96825	5.74875	5.06714	4.8478	6.56738	5.21949	7.07997	5.83207	5.45825	6.1796	5.12687	5.01375	5.92359	4.79063	5.45872	4.89396	5.41143	5.95478	3.78504	5.85521	5.05445	5.73122	5.93352	4.9787	3.91348	4.43414	6.09502	4.98509	4.11423	5.44243	4.50525	7.55086	6.09269
MRGPRF	4.2739	7.28512	5.27	4.94056	4.41414	6.37082	5.25204	5.07117	4.79145	4.7802	4.5454	5.25901	4.78979	4.31016	4.73213	4.49165	4.68294	4.90477	5.36683	6.68539	5.17239	4.78063	4.75239	4.31634	5.09062	5.0327	4.6476	6.50161	5.56255	4.31511	4.9549	4.96978	4.44326	5.71839	4.56172	5.99881	5.82535	4.71086	5.80713	4.90733	8.19058	4.8865	4.69123	4.53863	4.50262	5.52064	4.50647	4.40402	4.54049
ABCG2	7.59004	6.79691	5.42326	5.45849	6.187	6.69431	5.88706	4.7959	6.76815	8.65191	5.27232	6.64104	5.13181	4.7371	6.51969	4.76815	4.99542	7.98519	4.73589	5.89307	5.07313	5.85468	5.62682	4.92835	7.94868	5.35423	5.36637	7.02773	5.98808	4.59544	7.78785	7.28512	5.09796	6.97053	6.50639	5.93791	6.51263	7.87734	5.05012	6.78052	5.31845	4.59544	6.79115	4.91859	5.67139	5.7721	4.91627	5.56374	6.57278
OLFML1	5.11701	4.46503	5.99229	5.19948	5.04624	6.23518	5.14943	6.01855	6.71828	5.66241	5.07506	6.23798	4.41707	3.82412	5.44429	5.31692	9.44806	5.52481	4.94886	5.55833	5.36158	5.35701	4.99587	4.02124	6.54902	5.50615	4.40583	6.39652	5.44972	3.99077	6.05333	5.87904	4.41215	5.52686	4.97193	5.50086	7.35679	5.57168	5.954	4.9454	7.4372	6.44002	5.01799	4.76254	3.69629	5.29937	4.09952	5.48589	4.95421
EPHX2	8.31306	5.79321	6.50244	7.36406	7.87637	8.79795	8.72362	5.2491	5.72098	8.74784	6.22082	7.66321	8.38704	6.36948	7.65718	7.28037	6.61433	6.09143	5.37042	7.9461	6.51433	6.12246	8.10513	8.45989	6.76726	7.03885	6.55728	8.20821	7.09256	7.51238	7.5986	7.77601	6.91764	8.75518	8.25455	8.82429	7.62795	8.60855	5.67568	7.97568	6.11402	6.53548	9.26188	5.35561	4.75644	6.85496	7.84937	9.18421	8.72284
KDR	9.04496	7.13451	7.16731	8.72532	9.35974	9.59967	8.60349	8.00902	9.90193	9.55054	6.84237	9.8877	7.12828	5.93886	9.19193	7.44361	5.19001	8.83321	6.19749	7.82413	7.87328	9.48929	7.27159	6.18975	9.47206	7.91571	6.47489	9.11232	7.44517	5.20424	9.35458	8.74862	6.18648	8.72061	9.53499	6.49426	9.41417	9.65549	7.49523	9.35065	7.45071	6.60523	9.14057	7.76906	8.17423	7.88574	6.27328	6.85529	9.23286
LCN2	5.19709	8.01505	5.34496	5.01547	5.10018	5.02494	7.58753	5.0669	5.29767	5.02472	5.38509	4.92012	6.22417	6.74786	4.93291	5.72499	5.62962	5.36546	5.85221	5.48127	6.5677	5.71545	6.29412	5.39591	5.0787	5.2241	5.42627	5.51292	5.88319	10.0331	5.07805	5.19421	7.6856	5.76736	6.48291	6.14621	5.20934	5.20127	6.88545	5.25116	7.34584	5.15298	5.38121	5.32844	5.255	5.79299	5.78796	5.2791	5.64406
MYRFL	3.88866	3.65352	3.75475	3.6338	3.9095	4.3553	4.25703	3.54161	3.54595	5.06946	3.47471	4.48901	4.1171	3.91891	4.73004	4.87975	4.32116	4.75894	3.59295	3.94221	3.83172	4.49392	3.71918	3.72376	3.54261	4.06487	3.76809	4.51057	4.27764	5.80424	4.16798	4.2745	3.78857	4.68254	4.13256	3.78059	3.71983	4.79882	3.45215	4.47282	3.55582	3.89087	5.01163	3.65907	3.62809	3.46713	4.56504	4.08628	4.59869
APOLD1	10.1368	7.02413	7.52135	8.9979	9.06861	10.338	9.3559	8.084	11.3683	11.5038	8.02802	11.0606	7.3006	6.93976	10.2032	9.36657	8.05303	11.3345	6.81573	10.4621	8.62198	10.635	8.42997	6.61433	10.9906	8.084	7.61613	10.9613	10.2292	6.02393	10.628	11.7413	8.0945	11.2496	10.8931	9.95233	9.55207	11.2753	7.91124	10.7091	9.58356	6.46417	10.9711	8.27101	8.40908	7.84937	6.598	6.7724	10.0469
LOC102724927	3.03976	3.68686	3.3053	4.97328	4.3593	3.28776	2.91616	3.11055	3.08412	3.19464	3.26212	3.13719	2.88637	2.93253	3.39834	3.20856	4.30354	3.31551	3.25276	3.05364	3.28964	3.24505	5.92114	7.31997	3.47814	3.44918	3.62859	3.52258	2.88915	3.39507	3.12943	3.15756	3.24978	3.10427	2.98749	3.17735	3.36544	3.23181	3.12199	3.04088	3.27374	3.71169	3.18891	3.22831	3.19503	3.14301	3.56991	3.10334	3.63355
MATR3	4.44124	3.85408	5.83984	4.70214	4.81631	4.2081	3.82436	4.90797	4.15903	4.3553	6.8883	4.15442	4.7417	4.58156	4.26646	5.78285	6.36975	4.27727	7.23589	4.58138	4.81214	5.0913	6.73552	4.70109	4.61782	4.27783	6.08914	4.531	5.63312	5.68635	5.26174	4.95158	4.49452	4.46164	4.25602	4.73966	4.82239	5.21109	5.83428	5.24172	5.61475	6.17151	5.13962	5.83207	6.79876	5.16714	4.90436	5.04818	5.27866
SHISA9	6.42994	4.27469	4.25581	4.6906	7.28329	5.17802	4.92352	4.2369	4.27469	7.6226	4.15842	6.09752	5.33449	6.54985	6.64591	4.62078	4.17989	6.30683	5.21802	5.38646	4.67923	5.80283	6.02737	4.18755	5.38351	4.20411	4.74523	5.63661	5.1253	4.60273	4.43455	7.18892	4.84066	6.57918	4.75071	5.28046	6.01311	5.83911	5.20015	6.63755	4.28592	4.17284	7.83461	4.17241	4.18977	6.77269	4.22718	6.26735	7.72402
CCL21	5.25093	6.08121	6.58001	5.37782	5.1922	8.09276	7.65159	5.60147	4.93547	4.7708	4.76336	5.63612	7.55248	6.04361	4.81153	4.96371	5.61523	5.04581	5.71287	8.23967	4.90713	4.81612	5.902	5.11591	5.86183	5.38811	4.71607	6.06985	6.45545	5.24128	5.58102	5.58102	5.02237	6.25116	6.48736	6.0572	6.96285	5.08363	6.65781	5.03641	7.06752	5.43361	5.00798	5.87514	6.12602	5.30962	5.76641	4.95533	5.70839
FAM20A	4.81944	6.04286	4.89718	5.52198	6.07947	5.46901	4.46624	6.82569	5.53967	4.63602	7.11672	4.84568	3.85112	5.47849	4.11302	6.71505	4.98312	4.62716	6.42942	5.32254	5.20294	5.0729	4.05984	8.00107	6.36158	5.94772	6.21283	4.94204	6.07722	5.5792	5.0197	5.289	7.35459	4.93696	4.00519	6.95275	6.04066	4.24573	5.62753	4.53801	4.5266	4.708	4.62966	6.60441	5.87319	5.21132	5.71932	4.19018	5.43222
PP7080	5.65597	5.79824	6.36712	6.06703	7.02413	7.66199	7.46639	6.40787	6.41569	8.06424	6.59573	5.84779	6.50244	5.18751	6.65693	5.58034	7.02382	5.81975	6.26499	6.05801	6.93385	5.43062	7.5838	4.01262	8.59118	7.22619	5.94796	7.43094	7.74888	6.48539	7.85425	7.24812	5.80978	10.0796	7.90586	10.3557	5.43653	7.56053	5.83093	9.66063	9.32419	5.88851	9.60436	7.19957	5.58172	6.03819	6.35252	6.77483	6.87215
PCSK5	5.42878	7.1352	4.91094	7.23224	5.18977	6.23927	4.91395	5.14812	5.01569	6.11304	4.73338	5.95279	4.04788	4.34364	6.79174	4.95116	5.7157	6.59452	5.79059	6.29264	7.20282	6.46041	7.32791	3.93136	5.83711	5.14503	5.14525	6.09627	6.49796	4.27351	6.45048	6.28522	3.96013	6.07846	4.92926	4.92118	5.92359	5.58737	6.17523	5.42068	6.4851	6.36517	5.58265	4.98553	6.08661	5.29703	4.14183	6.42858	5.19464
DTL	5.43817	6.80816	7.25333	5.67234	6.44239	6.08044	4.73382	5.90463	5.81072	5.94256	5.7595	5.77852	4.43146	3.61427	6.00875	5.64808	5.6997	5.74588	7.39839	5.3817	5.09419	6.28703	6.5391	4.99223	5.40344	5.00774	7.03285	5.14638	5.60217	3.89516	5.11921	4.1116	5.78528	5.8574	4.26441	3.70479	5.26432	5.02928	6.02667	4.92179	4.58096	7.65552	5.92451	6.43815	5.70066	6.66419	4.73628	5.58996	5.04752
C11orf70	5.96	5.89797	6.72389	6.31785	4.99936	4.35509	3.88738	4.98882	4.39676	3.71544	3.67746	4.32418	3.7561	4.91586	3.76787	5.62469	3.88251	5.71545	4.49701	3.87339	5.99531	4.05546	3.60817	3.53375	4.27409	4.2349	4.62363	4.1906	4.16146	4.0653	4.05071	4.07011	3.70713	4.06867	3.66277	5.49991	4.50525	3.88979	5.36912	3.91348	4.93015	4.58035	3.5452	4.55137	4.19788	6.34645	5.8933	3.60132	4.79841
SLAMF7	5.09688	8.70708	5.06495	5.5294	4.82155	5.963	5.43653	9.54753	5.73986	5.06031	5.21973	6.40104	4.74564	4.46767	5.32643	8.33424	5.84756	5.12924	5.59372	6.20167	4.74523	7.12901	4.59213	4.71995	5.24622	4.79654	7.79838	5.0913	6.26397	5.12371	5.37595	4.73795	5.20259	4.89055	4.55947	4.50184	6.01144	4.61994	5.6278	5.5621	5.083	6.83271	5.36524	7.93194	5.30962	5.09837	5.46357	7.70163	6.24111
SPINK5	4.19141	4.27783	4.25703	6.6685	5.194	4.97975	4.68314	4.24475	4.92502	4.73065	4.62078	4.82984	6.92958	4.23161	5.37087	7.18533	6.25953	4.86247	4.25384	4.02489	4.39595	6.89965	7.25297	4.44145	5.81339	4.33404	4.10016	7.70601	4.52398	6.47736	5.52893	6.72329	6.11602	4.62385	5.67257	4.29942	6.11032	5.39634	4.12535	4.97328	8.05855	5.84196	4.87739	4.35175	4.38508	4.58966	4.84362	4.30454	4.85076
BMPR1B	4.12942	4.24394	5.90704	4.14307	3.90735	4.18611	6.06205	4.49515	3.87126	3.88272	3.82566	3.79657	9.3974	4.13069	3.74463	3.99077	3.79127	3.70055	4.05606	4.29152	3.87785	3.9966	3.77446	3.88188	3.88641	3.78325	4.01055	4.92948	4.06487	3.92808	3.79551	3.9782	3.79082	4.70065	4.19788	7.02183	4.05606	3.66443	4.35251	3.74327	5.04928	5.46333	3.85943	4.78895	5.90413	4.34111	3.83574	3.61353	3.71941
OMD	3.39082	3.4	3.73891	4.6176	4.04525	4.40281	3.52427	3.78236	3.28154	3.62292	3.37559	4.58583	3.35467	3.54209	3.34745	3.3965	3.32436	3.40028	3.34863	3.84643	3.44665	3.52604	3.53016	3.31458	3.83683	3.42634	3.42014	4.79507	3.64088	3.3274	4.04191	4.08447	3.30594	4.66396	3.92853	4.23346	4.98509	3.75885	3.72606	4.09052	6.12803	3.42392	3.41205	3.55076	3.52703	4.14838	4.07917	3.30875	3.31057
GAL3ST1	9.2719	5.2248	7.73519	7.961	9.92935	10.2906	9.19422	8.84098	7.81922	8.96315	10.5797	9.4835	5.94646	6.68362	10.1056	9.40024	11.1533	8.83836	10.6389	9.6173	9.29651	8.98804	9.26456	5.95776	7.53694	7.54716	7.95584	8.79304	8.58003	7.17638	7.96847	7.49999	10.8758	8.87419	8.19113	6.72062	7.68747	10.1317	9.06638	8.61607	8.00314	8.15611	9.59967	8.57937	4.98378	10.3185	6.63469	10.3642	9.86521
FGF13	7.05137	5.17059	6.41483	7.58917	6.04042	8.29811	8.82518	5.93034	6.55269	6.57664	7.04761	7.05984	8.43196	6.98378	5.88249	4.96031	5.98341	7.18073	6.95179	6.71421	6.97866	6.05155	5.37221	6.61033	7.5328	6.71145	4.21782	7.40338	6.00998	4.69142	6.58084	6.92958	5.25818	6.3189	5.41979	6.72147	8.05746	6.42061	6.39811	5.60952	7.23845	4.18631	5.16888	5.55577	5.26791	5.71738	4.04832	5.54175	5.38351
TRPC2	4.29269	4.10497	4.3479	4.0715	6.89486	5.16098	4.61447	4.34008	4.96394	4.25443	5.45987	4.52701	4.125	4.22935	4.16286	4.33853	4.39277	4.51136	4.48238	4.96196	4.47606	6.61114	4.56935	4.37381	4.95137	4.25364	6.6499	5.69319	4.50565	4.53636	6.35687	4.58076	4.17039	4.23671	4.59319	4.36992	4.77353	4.24375	4.21151	4.82261	6.74694	4.24713	4.25498	4.60273	4.46082	4.2081	4.1684	4.61805	4.37983
LOC100505498	4.15061	3.71497	5.99481	3.52229	3.66561	3.57581	4.30334	4.0818	5.289	4.76876	3.81997	4.66684	6.45023	3.53779	4.34364	4.74728	6.15612	3.97039	3.39082	4.04546	3.54261	4.82492	3.50125	3.57138	4.99936	5.83019	3.67141	3.80633	3.64971	3.70126	5.083	3.8425	3.80964	3.69798	4.20133	3.80724	4.15326	3.9099	3.95115	4.37238	5.48425	3.50905	3.82175	3.37761	4.24237	3.68362	4.36951	3.44194	3.55456
SLC28A1	7.14826	4.67329	4.48638	7.45313	8.5023	8.16991	7.16063	4.66877	6.40186	8.24367	6.82411	7.56533	4.54823	5.26907	8.42462	6.29846	4.8605	6.87181	6.55077	7.61488	7.78927	8.29128	7.84937	4.91586	7.01211	7.94305	5.25594	6.91543	8.01886	7.66886	6.90656	6.44673	7.36965	8.12475	6.37054	5.54197	6.54456	8.37225	7.21794	7.90394	7.92294	4.53822	7.55165	5.72619	4.47707	7.51277	4.95052	8.10513	7.95801
ILF3-AS1	7.37851	6.27303	6.24314	5.56399	5.60192	6.55501	7.34437	5.5581	6.19342	6.75146	5.57078	6.8665	6.92251	6.01215	5.77685	5.17016	6.0797	6.91512	6.22806	5.42352	7.43322	5.8739	6.6413	6.5247	6.72062	7.82885	5.70333	6.70106	5.65409	5.6308	5.76352	6.63469	5.72835	7.35603	6.51291	8.12924	6.85033	7.28289	5.89896	6.78081	5.09643	5.98541	6.6839	5.73534	6.12878	6.0993	5.9643	7.15781	6.44918
PLTP	8.18951	10.4194	8.94771	8.54302	10.4527	8.46051	8.07907	9.74621	9.52751	6.88517	10.7921	8.24252	5.89524	9.25327	6.11304	10.5666	8.94487	8.27402	10.3726	8.55609	8.72605	7.53975	6.99844	10.6533	10.7393	10.5597	8.24252	7.44586	9.23883	9.15946	8.41749	7.59986	9.94219	6.83489	10.0748	7.3366	10.5082	6.73245	11.3964	8.09394	9.68792	7.12089	7.38491	12.1434	10.1561	11.5546	10.6642	7.84164	7.72758
LINC00597	3.68339	3.83194	5.30869	5.79396	5.86021	6.20813	4.85701	5.9177	5.82947	6.86865	7.08639	6.28112	4.74481	4.52678	6.72711	5.82613	5.59628	6.63843	5.58737	6.37667	5.194	6.77119	4.8015	4.55176	6.96992	5.95752	4.73795	6.33247	5.19815	5.42742	6.95375	5.81027	4.51365	5.36796	4.46439	5.7324	7.30833	5.79801	5.57503	5.44291	6.05638	4.56751	5.31096	6.4631	7.15263	4.76	4.35891	4.57635	5.05768
GSTA1	8.87969	4.81488	5.03249	8.26555	8.05251	8.29873	7.8402	6.44615	8.34747	8.96024	7.82885	8.21111	5.32002	6.24566	8.46773	7.83758	5.74204	7.81786	7.33063	8.06642	5.19601	6.92348	7.61226	5.38992	7.65718	8.5473	7.03552	7.47515	8.63848	6.96416	7.61656	8.35301	7.41623	8.51957	5.27866	6.56446	7.49681	8.86122	7.88531	7.74613	5.35098	4.71813	8.68447	4.8865	4.93569	7.61656	6.36109	7.89769	9.01356
EPO	4.92032	4.85746	4.61064	6.93639	7.9461	4.63665	4.79343	4.81631	6.59968	4.70359	4.68314	4.58521	5.08819	5.37374	4.76169	4.6526	4.70864	4.86538	4.59483	4.74106	8.08241	5.50781	4.59047	4.79189	4.68808	6.02093	4.53478	4.83347	4.78728	4.99936	4.72641	4.49722	7.19107	4.82471	4.84251	4.60666	6.20681	4.79945	4.83808	4.70465	5.69923	4.97524	4.83392	4.69515	4.79945	5.53546	5.07332	4.74584	4.53946
C1S	7.97724	8.68992	10.8845	11.0452	10.8717	9.0512	7.92852	11.1305	10.2401	5.9007	8.13196	9.29175	5.54583	8.05963	5.50946	11.035	10.9663	8.18477	9.84558	7.53359	10.1223	7.38678	10.1931	9.22366	9.88149	10.7206	11.0659	9.13642	9.56445	6.52387	8.89346	8.74059	11.5893	8.32666	8.77631	9.14495	10.4804	8.50864	10.686	9.00964	10.1561	8.83927	8.52717	10.068	9.46771	10.8549	9.89987	10.6602	9.16849
TFCP2L1	5.13316	6.20788	6.30039	4.97107	4.82962	5.44546	9.05209	4.85876	4.99957	4.91859	5.56936	4.77671	10.2162	8.84195	4.94098	4.86853	4.93948	6.33299	5.18557	5.4894	7.03118	5.25135	6.82631	7.18746	5.18621	4.83958	5.09332	7.40034	5.36594	7.01632	5.4871	5.02691	6.11832	6.96158	4.84383	8.6287	5.12924	4.71007	5.30132	5.66997	5.94256	4.93696	4.82261	5.10262	5.0327	5.10307	7.35186	5.12839	4.91481
SLC24A3	4.39914	7.99244	5.83544	5.87979	5.02712	5.97627	5.16669	4.71188	5.27163	4.94584	4.36049	5.1678	4.51915	6.36975	4.28052	4.11016	4.70632	4.66251	8.38895	6.77757	5.12032	4.39079	5.33159	4.50026	5.96201	6.07699	4.09564	5.51646	4.53539	3.98466	5.27459	5.80164	4.29621	4.73569	5.23123	5.27232	6.09602	4.67436	7.25077	4.91221	8.02046	4.82155	4.2595	4.14777	4.1791	6.8839	5.59443	4.0317	4.21477
PI3	4.65764	5.86021	4.71007	7.81128	5.30063	4.41274	4.64925	8.40908	4.83683	4.5603	6.63321	4.47074	4.675	4.86415	4.22896	6.66364	9.74423	4.27745	4.90369	4.98509	4.8901	4.6756	5.22922	4.54396	4.49659	7.36858	6.59452	4.50606	4.84505	4.81924	4.42449	4.57078	5.98517	4.56504	5.34363	4.60401	4.52722	4.41304	6.08515	4.59276	4.3475	4.61655	4.45335	5.01418	4.61677	7.8069	4.5578	4.98247	4.49205
C19orf84	6.07748	6.03991	5.90678	5.87227	6.0451	5.64568	6.24134	5.71287	5.8749	5.45708	6.02141	5.39066	6.42858	7.07597	5.46596	5.70562	5.97311	5.4039	5.89626	6.16506	5.69875	6.45132	5.79438	6.03724	5.71839	5.48871	5.56936	5.53315	5.94671	6.33351	5.83428	5.72641	5.95478	5.81269	6.41237	5.62352	5.52755	5.7157	5.58482	5.78504	6.34933	6.04092	5.93472	5.66787	5.76999	5.87273	5.92451	6.07057	5.94944
CPA3	7.22006	5.68186	6.79288	8.00798	6.62207	8.42862	7.11989	5.09223	8.25702	6.85435	7.1624	7.88574	4.52885	10.2505	6.53939	5.41748	6.50555	8.14984	5.36267	8.43256	7.29531	5.66997	5.1755	4.20175	6.91512	6.6628	4.70315	7.82413	5.98711	4.32418	7.53893	7.46678	7.66708	7.20528	8.88832	6.59137	6.77993	6.34538	5.80663	7.43253	6.91387	5.76136	5.66054	6.72035	7.11777	6.43046	7.41183	4.64334	6.51911
CYP2C8	3.40313	3.44805	4.03531	3.92105	5.01462	3.65834	3.49594	3.5002	3.61764	4.57888	3.46765	4.94735	3.97502	3.89684	4.44941	4.64478	3.32982	4.56353	3.54493	5.10907	4.5454	5.0159	3.48586	3.60527	3.62667	5.12773	4.72228	3.71802	4.58787	4.67226	5.18022	4.72982	3.5525	4.21013	3.62786	3.60719	3.68686	4.05705	5.0514	4.16899	3.65522	4.69288	4.84568	3.57754	3.27636	4.47728	3.28521	4.70174	4.91331
SLC16A10	3.97693	4.46767	5.00798	5.29745	5.22341	4.80484	4.9129	4.06613	6.23012	3.63942	5.86899	3.67094	6.28601	4.69795	3.67332	5.2867	5.72263	5.94451	6.45379	3.98633	6.51515	5.02301	4.49785	6.77546	4.38591	5.83762	4.30711	4.6752	4.37014	4.48961	5.33497	5.52599	5.21154	4.61487	4.52438	5.16075	4.47929	4.039	5.19464	4.88293	4.54801	3.99472	3.91329	4.81719	5.77514	4.4894	6.1661	3.78655	3.5485
CORO2B	3.86869	4.60978	5.6308	4.1248	4.65029	4.23328	4.23245	4.72452	4.8063	4.87866	5.49246	4.41314	4.49268	4.17968	3.94385	3.71146	8.06327	4.39676	6.80612	4.41945	4.58827	4.39298	4.38123	8.40123	5.62541	4.54948	4.02919	6.06006	4.31291	4.50147	4.81903	5.77109	4.4547	4.96978	4.23977	6.55698	5.70883	4.56009	5.55505	4.35076	7.13044	4.43373	4.27802	6.67282	5.0497	5.94332	4.85943	4.32627	4.14224
DMGDH	4.91882	3.53862	4.17968	5.14311	6.64076	7.06821	5.81719	4.38612	4.36192	6.06932	4.51158	5.06142	3.64516	3.94743	6.06856	5.31282	4.13682	5.71863	4.07876	6.04262	4.91627	3.91182	5.47329	4.90164	4.83937	5.21887	3.75545	5.09462	5.37063	4.60461	5.41167	4.68353	5.45872	6.5708	3.82197	5.12861	4.76062	4.84974	4.37539	4.64944	3.85282	4.5556	5.42835	4.17384	3.45658	5.08493	4.14103	4.55215	5.31981
F2RL1	6.60322	5.74492	6.00506	9.07191	8.38767	8.35362	7.57539	5.4552	5.53919	6.97441	5.23526	7.76465	5.8059	6.71653	8.10725	8.37617	6.55779	8.74617	4.85897	6.30989	7.45434	6.21776	8.88752	7.6856	5.68946	6.36302	4.79507	8.45502	7.52091	8.64971	8.49595	7.60459	9.00576	7.94715	6.95594	8.4878	7.16831	8.04512	6.02165	6.97933	6.23721	7.27088	7.90237	4.76628	5.61265	6.74486	6.5722	8.84359	7.71347
CWH43	3.62048	4.34154	3.63404	3.53939	3.6122	3.91182	7.57673	3.96699	3.51683	3.75522	3.61451	4.05113	7.35337	3.7611	3.74603	3.69845	3.47762	3.82677	3.6521	3.70315	3.54544	3.45608	3.58316	3.40028	3.45411	3.87167	3.54161	4.08748	3.74099	3.62048	3.61427	3.78634	3.63751	4.54496	3.61835	5.44612	3.68435	3.64538	3.61376	3.55149	4.28292	3.60429	3.70434	3.52703	3.69334	3.71404	3.63506	3.71169	3.82175
APCDD1L	5.47804	8.42997	10.2187	5.58127	5.40689	5.19464	5.26226	6.62382	7.34812	5.13031	7.33779	5.08363	5.55252	5.74756	5.11193	5.29346	6.97441	5.49476	8.00798	5.30962	5.67353	5.45039	5.21132	5.38033	5.70333	5.99481	5.55105	5.55301	8.30423	5.33404	5.36361	5.2142	5.21351	5.41596	5.9416	5.46854	5.43905	5.3291	6.14519	5.2612	6.12852	5.88199	5.27044	8.26197	6.69339	8.00748	5.52686	5.20619	5.17016
EFNA5	5.57384	6.75265	8.47449	5.93693	6.68986	5.37619	6.68957	7.71173	6.90123	4.17667	8.03725	5.11831	6.82791	4.92544	6.679	7.12197	8.22874	6.24516	7.91934	5.19773	6.32054	5.26226	5.96868	4.21436	6.37289	5.3475	6.80641	5.93667	7.30982	4.91541	6.15156	6.37213	6.97275	4.87781	5.6997	5.88589	5.81243	4.73858	7.71213	6.34538	6.69247	8.1309	5.26791	7.03722	4.93096	7.50679	4.49248	5.55252	5.1517
FRMD3	7.37692	5.15057	5.57361	6.84665	5.92333	8.03342	7.00912	5.94356	6.51377	8.70708	7.20101	8.37225	5.99305	5.83019	8.50012	6.46692	4.98772	8.36652	5.21219	5.77397	6.54081	7.5108	7.18533	6.78719	7.28882	6.36684	5.80545	8.22458	7.45555	6.77301	7.92242	8.13144	5.03816	8.55314	7.88826	7.42469	6.67133	8.25766	5.71839	7.70731	5.65809	5.34294	8.49595	6.17832	4.75705	5.77955	7.33096	8.24314	8.02376
TPD52L1	7.57119	8.04563	5.8328	7.21172	7.98358	6.61257	8.93745	6.26786	6.45488	5.21554	6.44145	5.64428	7.78175	9.75852	4.81842	8.71497	6.05307	7.26694	5.06602	6.75205	6.92415	6.3386	9.28932	12.0291	6.45185	5.40092	7.59599	7.15133	7.14928	9.23064	6.45407	6.82825	8.0922	6.95932	5.70609	9.67413	6.95531	5.57708	6.80965	5.79947	6.76663	6.04239	7.19491	6.06084	6.30489	6.64759	8.7382	6.73821	5.76377
WDFY3-AS2	4.92564	3.83441	4.91245	5.02604	5.17461	6.33063	5.08	4.46302	5.08214	7.22303	4.58156	6.11525	5.97529	5.12595	6.33063	5.84996	4.34954	6.28496	4.53923	4.88794	5.80306	4.90326	5.25363	6.86124	5.59628	5.93913	5.11039	5.94477	5.61426	6.55048	4.98837	5.7401	5.72333	6.84816	4.54297	6.81792	5.17711	6.584	5.39704	5.54485	4.54992	4.71065	6.86996	4.32276	4.04423	5.34475	5.47329	6.39731	6.30863
PBLD	6.44507	5.54325	6.61551	7.70032	8.67198	9.31146	7.96204	5.89061	7.31164	8.99295	6.25247	8.32779	5.41301	7.24593	6.29156	7.79838	6.71232	7.74932	7.37806	7.35221	6.31969	7.35714	6.95079	9.40024	7.01338	8.92529	7.81177	8.33358	6.63728	6.87279	8.79708	7.33279	9.74621	9.67596	7.427	8.371	7.71521	8.61311	6.63728	7.96154	5.9558	7.05786	8.967	5.81624	4.73836	8.3775	8.01278	9.03721	8.26373
STEAP1	6.92737	8.39731	4.85529	8.14745	5.66976	6.56799	5.3731	5.50381	5.65275	7.24933	3.98299	5.53772	4.26401	5.3519	7.55505	5.50852	4.99892	6.24463	6.06252	4.65764	7.06554	4.51634	5.42464	7.48719	5.13758	7.20988	5.52064	5.25276	6.39174	5.36707	6.19775	5.7997	6.16762	6.94853	5.09553	5.168	5.5893	7.19387	5.05716	5.86559	5.81122	4.8763	5.62892	6.77028	9.09712	4.5578	6.85847	3.65327	4.92118
SLC16A6	6.34754	5.62659	4.50952	5.38646	5.25158	5.58858	4.6675	5.94307	6.55077	5.87227	6.93126	5.44269	5.83762	5.42764	5.7245	5.71618	5.92139	6.14291	10.1151	6.06932	6.78809	5.2375	4.5679	5.95606	6.484	6.85561	5.92259	5.00969	6.93824	6.37185	6.67192	5.93863	7.49372	4.74987	5.94404	5.09441	5.99809	5.4664	6.22883	5.45544	4.99783	5.9516	5.07701	5.26249	5.84006	8.71981	4.98944	4.79302	5.87904
STEAP4	5.47507	4.80693	5.18288	6.93543	5.37042	6.70959	5.69779	5.76736	7.06786	6.04361	6.30547	5.57288	4.00024	5.20283	4.57449	5.81931	5.58357	6.82006	4.25539	5.38055	6.62064	5.68088	4.36592	5.24801	7.72536	6.90062	4.69246	6.54374	6.10755	4.12637	6.40594	9.46771	5.29459	6.55983	5.67761	5.86583	6.9777	5.6913	4.73879	5.71215	5.42208	4.72103	5.78193	5.90174	5.24017	5.17527	4.46583	4.29288	5.26747
RP11-1L12.3	4.17284	5.43296	4.15903	4.3377	4.74127	4.02203	3.84359	3.93374	3.5495	3.85408	4.06948	3.66443	3.78146	4.01615	3.85408	5.31891	3.83043	3.65399	3.77759	4.12015	5.83497	3.80654	3.89495	3.98674	3.9397	3.98179	3.95054	5.56278	3.75933	4.29033	4.83872	3.6516	3.67565	3.98299	4.11462	3.9204	3.50671	6.24212	3.69845	3.80314	4.95421	6.74271	6.39892	6.00998	4.42409	3.9095	6.25168	3.99201	3.79999
RP11-769O8.3	5.58433	4.29603	4.58437	5.23431	4.65904	5.94451	4.42921	5.3361	6.08889	6.13483	4.26991	4.42249	5.55855	4.54682	6.15331	5.05293	4.07032	6.0802	4.60751	3.79722	5.89478	6.04142	4.6526	4.08948	4.5145	4.75601	4.77414	4.95512	5.77184	4.30731	5.12119	5.01226	3.80643	4.36929	4.88169	4.86201	4.39815	4.28031	5.11127	5.10352	4.65745	6.30067	4.69646	5.26408	7.29682	4.16188	4.09521	4.7417	4.54781
ND6	7.36668	6.46144	7.52672	8.04243	7.11744	8.0819	8.03442	8.03777	7.26357	7.22652	8.70241	6.2645	6.52661	8.45296	8.01222	7.4087	5.90149	6.97475	5.30488	7.14269	6.69399	6.21751	6.39892	6.15482	6.97506	6.97184	7.13416	6.90656	8.37417	6.22832	5.57776	6.67463	7.14269	6.81573	5.01141	7.15064	4.90288	4.7488	5.35631	5.4466	4.78456	7.38829	4.97238	6.36027	7.4812	5.17888	4.56567	5.40024	5.12643
ZNF883	3.81928	3.42218	3.44031	5.92941	3.90235	3.2544	3.27404	3.89107	4.64537	3.32183	3.36191	3.30719	3.24231	3.91034	3.78973	5.41432	5.09553	5.0641	3.34714	3.35467	5.58811	5.87561	3.36777	5.8805	3.69702	3.32982	4.77249	4.36352	3.15461	4.07093	3.39592	3.33666	3.12471	3.39507	3.37792	4.99828	3.9782	3.55877	3.37644	3.32954	4.47135	3.62833	3.57556	3.67024	4.70272	3.35766	5.38398	3.4347	4.02772
HMMR	4.14677	6.59043	7.34511	4.17507	5.89401	5.56633	4.60915	6.37748	5.11788	5.06099	6.51037	5.23411	4.18694	3.73268	5.29615	5.74711	6.70106	4.97651	7.47595	5.41235	5.0725	4.75894	6.99483	4.72331	5.11193	4.61152	6.89871	4.51915	4.89374	4.14082	4.83498	4.26627	4.81447	4.55639	3.94221	3.9283	4.76336	4.49474	6.44211	4.52234	4.73507	6.989	4.50004	6.87148	6.57498	6.94512	4.37422	5.50269	4.86873
GLRB	3.97126	5.08973	5.45849	3.52652	5.00882	3.44389	4.49351	4.08929	5.2769	3.39775	3.21154	3.46603	4.06081	4.07876	3.3537	5.32978	3.39805	5.73026	3.51611	3.39592	3.77446	3.44499	3.42187	3.37821	3.93418	3.70523	4.28031	3.84748	3.38235	6.12219	3.66957	3.52258	3.42634	3.76719	3.44918	4.89481	4.94497	3.44866	3.81531	3.59868	4.07501	3.75454	3.39337	4.40321	4.26241	4.52477	4.47626	3.29376	3.73384
CDH5	8.53592	7.10782	6.7373	7.85033	8.46974	8.18414	7.50195	7.34511	9.46486	8.47954	6.4275	9.01731	6.50841	5.10174	7.80455	6.28677	5.68806	8.40446	6.44752	7.35029	8.09276	8.29259	6.61401	5.05337	9.75324	7.80083	6.52055	8.60641	7.04833	4.98041	9.19774	9.08876	6.33247	8.20405	9.38441	7.56053	9.70542	9.15377	7.43135	8.91779	7.71475	6.77666	8.22874	7.25226	8.69135	8.0318	6.04239	6.27353	8.16815
ZNF658	3.69288	3.34504	5.8432	5.23951	4.79841	5.95208	4.66519	4.6958	4.708	5.91298	5.54413	5.66884	4.9493	4.1791	6.47708	5.30155	3.79442	5.43176	5.5567	5.12416	5.44291	5.50852	4.65113	5.4564	5.57193	4.9165	4.61278	5.48175	4.55353	4.74773	5.07485	5.04559	4.14636	5.68186	3.94702	4.98596	5.17172	5.44794	4.14636	5.39884	4.72207	3.5932	5.21069	4.68703	3.60353	4.46017	5.69757	4.96931	5.55324
CA4	6.00829	4.78478	4.84485	4.8912	4.79189	6.44809	5.91995	4.73879	4.7503	5.92333	4.90883	5.35954	4.4646	7.14753	5.14164	4.84485	4.62014	6.74271	4.8631	6.3531	4.50647	4.67124	5.06099	5.82848	5.79036	4.64882	4.52113	7.30514	4.77876	4.53539	6.48237	7.02908	4.71607	7.22939	7.67964	6.37507	5.35467	6.96894	5.39273	5.21802	4.63994	4.70131	6.69487	4.78418	4.51994	4.79103	4.99915	4.74148	5.24599
PLCD4	4.36211	4.58398	5.06031	4.50667	5.60655	4.29603	5.9502	4.6756	4.3373	3.92546	5.25684	4.31732	7.3192	9.02123	4.95945	6.19549	4.49205	4.01834	5.07313	4.60106	4.29346	4.48421	5.88658	7.73156	4.50445	4.31388	4.18351	5.1997	4.69081	6.3309	4.46888	4.13682	7.15198	4.71105	4.26056	4.82177	4.7123	4.51489	5.28157	4.4874	5.08908	4.71026	4.20488	3.76855	4.2743	4.97214	7.12343	4.20273	4.46927
ZNF595	5.8287	6.48372	3.35434	3.93157	4.44776	4.76609	4.65845	3.70897	3.45411	3.4602	5.49619	3.7136	3.70434	3.5937	3.3942	3.49698	3.99348	4.8978	3.7926	4.56833	5.5703	3.51974	6.40919	3.77332	3.46051	3.5373	5.70657	3.46303	3.55199	3.50519	3.51557	3.66863	4.16344	4.61634	3.69774	3.60503	3.54235	3.74191	5.13161	4.36071	4.1118	3.82804	3.53069	4.87191	3.68082	3.606	5.54939	3.43952	3.52153
AK025288	5.69731	5.00708	5.75494	6.81915	6.46281	6.41838	5.699	7.29023	6.4631	7.38264	8.04134	6.94348	6.62207	7.41023	7.89824	7.36821	6.59252	7.10887	7.16379	7.87229	6.71859	8.01449	7.46714	5.81243	7.86	6.96604	7.10814	7.42357	7.1259	6.64017	7.65552	7.359	7.00404	6.45545	5.08908	7.26865	7.75593	6.76275	7.36252	5.89749	7.58504	6.11501	6.06551	7.90933	7.92797	5.30108	5.60952	5.61404	5.85691
LGALS12	4.29803	4.55196	4.96261	4.61697	5.97602	4.05705	4.376	4.45834	5.94256	4.10955	4.19344	4.24154	4.75828	5.19993	4.21093	4.58827	4.46017	4.87825	4.70337	6.09219	6.49369	5.76761	5.30605	5.65153	5.00506	6.56071	4.72982	4.45938	4.66663	4.41052	5.42944	4.62861	6.00854	4.28553	4.73668	4.09931	5.35284	4.26522	4.83745	5.88075	5.69368	4.4024	4.19481	4.05546	4.44306	4.29545	5.91872	4.22351	4.08929
CYP3A5	5.73363	3.70055	5.97265	6.71799	7.54187	6.99682	6.01617	6.41923	5.93082	6.69187	8.06642	6.23469	3.77376	4.11138	8.69996	7.24628	6.20435	7.31698	6.81157	7.73244	6.30765	7.02876	6.50131	8.58601	5.38121	5.59137	7.0024	7.14928	7.6498	9.79738	6.81605	6.15357	7.45824	7.10341	4.2687	4.7148	6.40432	6.12878	7.16478	7.55294	7.37239	7.4376	6.73183	5.66381	3.61953	7.04662	8.87419	7.52345	6.85128
G0S2	8.65509	8.76335	9.20463	10.1056	8.90753	9.07822	9.95233	7.82885	7.62393	8.17888	10.57	6.61951	7.43924	6.69572	5.08451	7.55846	8.65045	7.44281	9.73229	7.92543	11.3683	7.68969	9.60276	10.6073	7.27785	11.5038	8.66135	7.71852	8.58227	7.47751	10.0199	5.82383	7.42503	8.10833	6.9059	7.997	9.78076	6.32708	10.4375	7.04503	8.87969	10.3834	5.64928	9.10238	7.51481	11.0051	11.5805	8.03014	8.25392
LOC100129406	3.77848	3.63	5.12184	5.20015	6.06181	5.71193	4.37501	5.22721	4.98837	5.99957	7.20771	6.11207	4.23014	4.29033	6.56102	6.16968	6.2622	6.31016	5.52686	6.62064	4.7509	4.85529	4.70925	4.17766	6.78778	5.58811	5.51713	5.26976	5.5424	6.03475	5.44316	5.80496	5.24062	5.3934	3.535	5.85069	5.93154	4.91266	6.16684	5.22966	5.78747	6.11756	5.25709	6.71203	6.17808	5.21573	3.74351	5.73558	5.46309
LINC00086	5.44569	4.03228	4.43699	4.36292	5.39932	5.64523	4.72684	3.70943	4.84525	4.82922	3.87339	4.96091	4.42696	6.77362	6.50755	5.5621	3.81247	5.70839	4.61847	5.05621	4.40703	5.44197	5.12595	7.55673	4.72017	5.18709	5.37462	4.52496	5.49737	6.40594	5.11039	4.43022	4.39337	6.58706	3.90929	4.55433	4.91115	5.16995	4.85466	4.83599	4.14898	3.76088	4.91836	3.76946	4.05767	5.64262	6.76216	4.73338	5.22081
F13A1	8.37617	9.05009	9.82217	9.91873	8.26074	10.1105	8.89527	10.5597	9.2318	7.14232	11.3408	8.99102	5.72641	9.4509	6.42301	8.967	7.79931	8.63541	11.1098	9.04496	8.14925	7.10814	6.66995	7.92496	10.1342	10.5239	8.49595	6.9082	7.70731	5.67523	8.93565	9.73738	7.61181	7.84802	10.4465	7.60977	10.2292	7.0447	8.11837	7.59045	8.73015	5.22854	7.67793	11.4179	7.70119	8.60997	6.95832	4.72853	6.92186
ST8SIA4	5.18709	5.55649	5.63709	6.96479	6.31651	6.21877	5.04752	6.56937	6.53683	5.82589	6.51179	6.83614	3.7767	3.93587	6.6631	5.99156	5.26816	7.13553	5.82736	5.62848	6.45793	6.2645	5.71287	4.51613	6.09243	5.51525	6.08965	6.20611	5.03751	3.77288	5.90561	5.47663	5.30557	6.95465	5.4386	3.9832	6.19575	5.73289	5.39412	6.51351	4.56994	4.9439	4.91375	6.88578	5.77955	5.51899	4.46302	6.3279	5.36683
GIMAP7	7.10341	7.57881	7.49836	7.6835	7.1071	8.38187	7.0315	8.29998	8.00955	7.75824	7.01984	7.87685	4.72684	5.04886	7.64382	7.20421	4.98017	8.33611	6.38456	7.55086	6.6628	9.08144	5.66764	5.66645	7.65801	6.5377	7.06453	8.01558	7.63138	4.51715	8.19529	8.63099	5.04456	7.09256	7.6153	5.85269	7.18892	7.29643	6.97151	7.3919	6.43512	7.26976	6.76044	9.23404	6.04983	6.08736	5.7497	7.97312	7.45555
LOC389831	3.65257	3.78589	4.32917	5.24344	4.36049	5.50223	5.52823	4.74066	4.46039	4.20447	5.29481	4.29683	3.8195	4.2517	4.14328	5.769	5.87587	4.03795	4.64498	3.91203	5.38717	4.90733	4.83724	5.12205	4.1918	5.22966	5.23861	4.27069	3.91442	4.81234	4.39735	4.01389	4.14001	4.47033	3.9099	4.09237	5.41772	5.48402	4.68192	4.46039	4.23057	4.38342	4.17968	4.62566	5.39364	4.44061	4.6174	4.59768	4.18189
CCNA1	3.93157	3.92853	3.78612	3.8083	3.81403	3.79529	3.81028	4.04525	3.77356	3.57881	3.90673	3.89684	3.83286	3.84316	3.6504	3.55755	8.34558	3.68317	5.29369	3.8211	4.41571	3.97457	3.89172	3.89767	3.81007	3.80176	4.68213	3.91613	3.90321	4.04629	3.79611	3.76835	4.66814	3.7373	4.04609	4.22286	3.68128	3.71941	4.46827	3.79529	4.13601	8.2944	3.92188	3.78282	4.37057	4.80693	3.96332	4.56294	3.74916
CTGF	8.91297	11.0659	10.5534	8.90588	8.02376	10.0356	9.06861	10.04	9.76589	8.59925	7.41266	9.60583	8.40908	8.65509	7.8402	7.30394	7.97568	10.0611	9.19537	9.40293	9.88958	8.23788	8.78545	6.21621	10.6897	11.2364	8.82179	11.6165	9.4227	8.54952	10.3185	11.3821	7.57881	10.7475	11.015	11.8861	11.4563	9.87327	10.3752	9.36786	11.8601	8.61745	8.42198	8.29811	8.2722	8.38642	9.59126	6.42301	7.35976
EDNRA	7.05171	5.30581	6.56856	7.45628	7.20847	6.93093	5.89896	6.43705	8.56278	7.20179	5.92359	7.25333	5.19993	4.08326	5.79438	5.98089	6.5633	7.21861	5.59795	5.19287	7.17678	6.12524	5.28471	4.32769	7.427	6.869	4.74356	6.9932	5.95068	4.29603	6.92124	6.25593	5.25684	6.4741	7.51813	6.10404	7.99953	6.76012	6.51911	5.88369	6.64818	5.28269	5.73747	6.06985	8.45502	6.30711	4.53923	4.54234	5.43013
MT3	6.15482	5.56114	8.41169	6.75236	7.58791	5.59067	6.39374	5.40092	7.52713	5.11258	5.45107	5.35237	7.79453	7.59514	5.23145	6.34781	5.89571	8.14395	5.91102	7.24226	5.1831	7.04282	6.76758	5.13202	9.11232	6.76965	5.54085	8.20463	6.0202	5.23884	5.98364	7.59091	5.28313	5.20553	6.0948	5.49922	7.2734	5.58407	5.28134	6.14391	6.75863	5.5698	5.15748	5.33885	5.69923	7.29904	5.5668	5.25986	6.04066
LAMP3	5.63612	6.73821	4.59704	4.50125	5.84122	6.30863	6.27328	6.74969	8.32969	5.7117	5.46148	6.2367	6.60665	5.89996	5.25025	6.40322	5.65716	5.78478	6.4951	7.05069	5.88782	6.51969	5.2173	5.71479	6.0993	6.33571	7.44361	4.87253	6.03206	4.42148	5.81436	4.82239	5.78311	5.11169	6.30174	5.32118	6.11427	4.83537	7.46199	4.93632	5.50875	5.32298	5.77979	6.78719	5.37875	5.94502	5.54367	6.57918	6.29521
FXYD1	9.11116	6.00806	6.02492	7.21026	6.5747	6.78294	6.56558	5.47485	5.86605	8.50931	6.76475	6.71537	5.79753	5.54723	9.41282	5.22341	5.81269	6.6622	5.59303	6.58031	8.45502	6.15995	6.0876	6.43788	6.90754	5.80713	5.09108	7.523	5.6761	5.58623	7.19069	6.61433	8.95161	6.97837	7.23408	7.03348	7.34475	7.12627	6.88862	9.34804	9.6124	5.72026	5.79321	5.53168	4.98837	6.85785	5.91723	5.28134	5.65785
PPFIA4	6.72744	4.36252	7.4795	7.42503	6.76844	6.01927	4.92138	5.64568	6.49766	6.70815	7.0369	6.80399	4.16421	4.66599	5.30132	6.18065	6.92155	6.07798	7.88727	6.34728	7.47474	7.07997	7.59264	4.08968	7.53441	7.84116	6.98098	6.82507	7.7401	3.90548	5.62517	7.06384	6.17313	6.02116	6.17151	4.35117	6.65721	7.05514	7.18179	7.45745	6.94542	6.36601	7.51892	6.24543	6.41054	5.99784	5.89307	6.32292	7.4076
CLNK	3.75838	3.85519	3.89023	3.80546	3.78059	3.93653	7.50957	4.01324	3.91829	3.82021	3.90735	3.88738	9.40428	3.67771	3.83726	4.01955	4.00497	3.92105	3.77062	4.18132	3.7485	4.02203	3.87464	3.86029	3.76764	3.76719	4.11972	4.41093	4.04081	3.9028	3.86932	3.87505	3.87254	4.11116	3.76608	4.14262	3.91442	3.79529	3.96699	3.82219	4.01637	4.40642	3.84534	4.75663	3.83241	3.87485	3.80086	4.13131	3.88418
QRFPR	4.82617	3.50772	3.45658	3.64064	4.37238	4.63232	3.82827	3.52309	4.03756	6.09802	4.96545	6.44184	3.37062	3.61327	4.83808	3.82436	3.42014	5.84802	5.71074	3.44569	3.5811	3.82372	4.49126	3.60576	4.66899	5.68897	3.64348	4.52438	4.44124	3.66092	3.91958	6.22782	3.98612	5.84466	4.18977	3.37174	4.32789	6.39652	4.1987	4.38711	3.71706	3.82654	5.75096	3.60744	3.54209	6.44157	3.49383	6.0797	5.60818
NID2	8.50792	11.2496	8.0922	9.38724	8.14574	8.38502	7.29204	8.46513	10.511	8.41944	6.31544	8.80742	5.34586	4.4886	7.3006	7.08639	6.8926	8.75019	6.95113	7.87477	8.0747	8.11328	6.85069	8.36255	9.90612	7.64216	6.66472	8.12242	7.27122	5.4148	9.50937	7.72626	6.60441	7.63809	9.26456	7.96204	10.1173	8.47251	7.68474	7.48963	8.55913	7.13685	7.35976	7.7157	10.8373	6.8864	6.43978	4.87911	6.75893
SATB2	5.71839	4.401	5.91025	5.06772	5.55181	4.98205	4.07605	4.11239	5.22898	6.24439	6.3112	5.99734	3.73516	3.94262	6.54051	6.0078	4.09094	6.05827	5.12205	4.61932	5.17416	5.77933	4.90839	5.36201	5.31282	5.63999	5.51503	5.34518	5.33068	7.93047	4.41052	5.29591	4.41687	6.26786	4.23896	5.47187	5.15407	5.9492	5.20576	5.21284	4.18917	6.11602	6.33544	5.26632	5.77397	5.42722	5.5546	5.15496	6.63701
BDKRB2	6.57833	7.59514	6.03228	8.39921	7.70601	6.08591	7.11439	7.67964	7.6195	5.9787	9.69971	5.34045	8.62794	7.1946	5.42438	5.21466	7.43288	6.49344	7.33203	6.73971	9.17504	6.46916	5.42022	6.11932	6.03057	6.80612	5.61025	6.9028	6.5047	5.07658	6.96126	6.27512	8.84098	5.79632	5.10396	7.97412	6.6436	5.75236	6.27378	5.881	8.1941	5.56068	5.53677	5.97504	6.22959	7.00644	6.90312	4.72411	5.30738
EBF2	4.96692	3.70502	3.85541	4.98575	5.19623	4.94412	6.77301	4.32563	6.73101	5.72192	4.86518	5.51946	9.07603	3.68197	4.68414	4.32709	4.45086	5.3253	3.97841	4.13542	5.02863	5.05684	4.20329	3.74507	5.45593	4.42312	3.93285	5.05726	4.55371	3.76452	5.32142	5.09665	4.14491	4.89865	4.92481	3.96638	6.14697	5.52088	4.15702	4.94795	4.88272	4.11383	4.38552	4.69624	4.05406	4.64925	3.63167	3.81379	4.69983
LINC01111	4.7526	5.26518	4.39496	4.60021	4.32195	5.39178	4.4026	7.87477	4.57511	3.98466	4.64396	4.49411	4.08039	5.53099	4.9231	7.04407	8.10618	4.79446	4.15143	4.6052	4.11812	4.85679	4.19121	4.22067	4.69142	5.9462	7.08502	4.61152	4.92645	4.25766	4.17847	4.60688	4.29152	4.15882	4.23328	5.13316	4.12903	4.43516	4.58583	4.54212	4.35429	4.34154	4.77813	4.96394	4.22516	4.41052	4.30583	4.25015	4.25622
FOXQ1	7.81355	7.37692	5.28647	6.45185	7.31507	8.35552	7.84846	4.67885	7.04147	8.47251	8.75271	8.90588	6.57498	5.69757	8.09036	7.5076	7.73111	6.48902	8.27645	5.44947	7.66843	7.74844	8.61745	5.11966	7.94101	7.77885	6.39946	7.26549	6.92026	9.10892	7.32456	5.78796	7.57042	7.41141	7.80501	8.85223	6.27016	8.77891	7.58089	7.02382	10.6642	6.63265	7.93194	7.69189	5.86559	7.52713	6.89579	8.88401	8.66051
MAGI2-IT1	3.07341	3.31492	3.83638	3.96394	4.08469	3.37936	3.84446	3.43362	3.59677	3.34983	3.38673	3.45355	5.71359	4.29703	3.13034	3.60208	3.22073	4.62318	3.44665	3.65067	3.61813	3.64256	3.30812	5.56161	3.67202	4.43719	4.37923	4.72641	3.65639	4.18289	4.13621	3.7622	3.07396	4.18228	3.49302	4.09277	4.29014	4.04191	4.46418	4.01596	4.12803	3.48873	3.37236	3.29607	5.09529	3.81895	5.48312	3.18214	3.32772
IL7	4.07093	3.94322	6.17497	6.26527	5.80115	5.93154	4.00782	5.97064	4.60895	5.60338	5.96072	5.28557	3.48953	3.38845	5.66078	5.45777	4.56091	5.4552	5.66573	3.69197	6.34214	5.31167	4.13659	3.54161	5.29569	5.7442	5.42303	4.48052	4.81924	3.56086	4.78	4.75936	6.68802	3.84685	4.3244	4.33569	5.65739	4.56376	5.95555	5.15634	4.46806	6.91099	4.91158	5.96224	3.93457	6.11106	4.23565	5.99156	5.25944
HLA-DQB1	7.23083	8.54372	5.65319	9.13858	5.68562	8.13598	7.80735	8.72362	8.63987	7.49292	7.39606	5.8437	4.77058	5.78359	8.34615	7.84557	7.72758	5.44039	8.10568	8.48353	8.4084	5.79346	4.91968	6.41429	5.45754	5.64021	8.57937	5.72593	8.32118	5.3034	5.59702	7.3397	5.38717	7.14615	8.53078	6.70076	8.42862	5.34586	7.4812	7.45027	5.39389	6.43761	7.64859	8.08241	6.91258	7.76555	5.5902	8.98414	8.18587
COL5A2	7.91031	10.7593	8.69847	9.17738	8.12242	8.35949	7.36931	8.50367	10.3983	8.04462	7.65381	8.3316	6.63616	4.98017	7.23048	7.37964	8.21517	8.75766	8.00639	8.22578	9.03315	8.72136	7.48033	4.90943	9.58983	7.81074	6.66965	8.20056	9.62067	5.35725	8.86547	7.69942	6.85907	7.51968	9.77497	7.00743	9.76404	7.97724	9.20351	8.05799	9.23064	11.6362	7.06489	7.37498	11.5466	8.40056	6.03843	6.01879	6.76567
COL8A1	5.20911	7.19527	8.71182	5.40138	5.32686	6.14921	5.16868	5.59513	6.22365	5.49831	4.05071	5.45544	3.95032	3.5143	5.28313	4.78126	7.6856	6.31544	5.00571	5.00708	5.39704	4.58236	4.90818	3.37761	5.62283	5.43473	4.20372	5.97064	4.8138	4.33239	6.6842	5.59986	4.77165	5.32439	5.98317	4.51694	5.9255	5.54085	5.58951	5.68831	5.73265	4.34587	4.97671	5.38099	5.30783	5.4466	4.3479	4.17645	5.08386
SOWAHA	5.18931	4.06908	3.71544	4.10281	6.77058	4.2264	4.58437	3.48953	3.74916	4.60666	3.83241	3.50643	4.21642	4.15641	4.5605	4.46989	3.67118	5.63734	3.89281	4.78584	5.03641	4.1068	3.80746	4.32647	3.83746	3.64374	3.53472	4.80192	3.75999	6.22934	5.24482	3.70126	6.00353	5.25297	4.20447	7.03485	4.69624	3.69751	4.61214	5.07571	4.71169	3.81288	3.69176	3.60085	3.59986	5.48662	4.09257	4.65926	3.73821
GAREM	7.86487	5.79346	5.96989	7.32945	7.36054	8.21756	6.94479	4.8278	6.8839	8.11492	5.52246	7.75349	6.19393	6.64906	8.44958	6.91639	5.40442	7.60238	5.71764	6.75596	6.9342	7.17715	7.3196	7.50842	6.28996	7.2994	6.22677	7.75441	6.49567	7.4087	6.61808	6.63496	7.42893	7.46398	5.92381	7.48389	6.42141	8.0085	6.08539	6.99285	5.60385	4.04274	7.97207	6.18039	5.43517	6.80031	6.53329	7.72674	8.12978
LINC01114	4.91816	4.47909	4.2156	4.34485	4.34111	4.28011	4.45169	4.31253	4.30653	4.40199	4.2237	4.41433	4.17	4.15102	4.51976	4.25653	4.1502	4.76548	4.25364	4.25209	7.21686	4.30731	4.62279	4.63191	7.02319	7.55464	4.36713	4.28091	4.26544	4.00205	4.37463	6.46014	4.41274	4.54781	4.61612	4.28135	4.32359	4.42618	4.20133	4.46707	5.67995	4.17467	4.22305	4.00453	4.20707	4.30633	4.49452	4.12659	4.32076
ZDHHC23	4.99587	5.48662	5.74803	5.32209	6.3041	6.67959	8.28806	5.40829	5.73048	6.33728	5.59372	5.74778	9.87327	8.05695	6.32922	5.54439	6.44184	5.7552	5.64167	7.25552	6.90344	5.4434	7.87883	6.71537	5.83139	6.02241	6.1773	5.75259	7.15639	6.7636	5.84637	5.61265	6.52689	6.32979	4.38165	7.04112	4.99718	6.1371	6.66995	4.94286	4.70065	5.12052	6.19799	5.47529	4.557	5.83688	6.96766	6.45379	5.88004
LOC100132891	5.22341	5.55602	6.85281	4.76815	6.19166	5.87227	4.04974	5.60772	4.97088	6.65313	4.9397	6.57106	3.44361	3.45991	5.08234	5.76974	7.32604	6.00006	7.42198	6.14674	4.41471	4.38282	5.55928	3.84857	6.47788	7.30588	5.95903	5.86631	4.81884	4.41607	6.24005	5.56727	6.94228	6.13303	4.75008	4.33096	6.20611	6.65018	6.57331	5.29836	4.42249	6.16633	6.12778	5.12371	6.9101	6.22289	4.535	6.30626	5.89109
CLSTN2	4.00782	4.45335	4.85271	3.77826	3.92615	5.95903	5.10728	3.87828	3.97652	3.75454	3.6473	4.36532	4.16878	5.99531	4.401	4.18169	4.1922	4.06003	3.78125	4.78296	3.6461	3.87339	3.90171	4.32418	4.49866	3.6521	5.34657	5.17461	4.64294	4.66578	4.22328	5.03057	3.82852	4.60401	3.90259	5.58034	4.45834	4.00661	4.60729	4.39317	4.78542	3.71473	4.12679	3.66608	3.99873	4.42088	5.38077	4.38671	4.54029
ACKR1	6.87883	6.16839	5.77852	7.29682	7.43135	8.21994	7.41474	4.76733	8.12125	5.44064	6.42166	7.02286	5.77685	5.75121	5.76878	5.78991	5.77852	8.16815	4.4654	8.99991	5.43678	7.87782	5.74945	4.95116	7.16582	5.54749	6.27278	8.16124	7.62703	4.55947	7.85329	9.15946	6.23544	6.15688	6.64274	7.78071	7.49251	6.11681	7.06619	8.176	8.45029	5.97191	6.24059	6.52773	5.24506	6.2216	5.82431	5.90123	7.19666
LYZ	8.6445	10.8207	10.2478	10.635	10.57	8.79708	7.61572	10.7091	8.0617	8.01111	10.3158	10.4073	5.73534	8.91779	6.69572	10.8333	9.71627	10.0221	9.03628	8.66902	8.01722	8.59773	7.93901	9.08144	10.1198	7.04662	10.2427	9.42423	8.38061	7.63858	9.7247	7.26255	9.40293	8.87969	10.4593	7.46871	10.9906	8.00639	9.55822	7.94305	8.76011	9.16174	10.6037	11.426	9.86722	9.05009	6.83005	9.30663	8.34988
DIRAS3	4.04039	4.8015	4.46343	3.99895	6.23902	5.98663	4.90414	5.54939	4.65599	4.44635	3.48639	4.59299	4.09072	6.47382	4.09521	5.2415	3.64635	6.52908	5.10083	5.25639	5.13326	4.05426	4.05071	5.62424	4.74127	4.62797	5.05226	5.08561	5.40984	4.58035	3.83529	3.98529	3.75475	4.95266	3.48107	6.05927	5.16669	4.28233	5.41889	4.61042	4.40321	3.40056	3.80418	3.75119	5.17571	5.06537	3.68709	7.06282	4.03775
TLR1	5.43296	6.37832	6.55106	6.90531	5.50875	6.41347	5.16098	7.58709	7.51442	5.91002	7.28219	6.81451	4.91607	5.33208	5.9765	7.33169	6.10983	6.30547	6.8405	6.70076	5.65833	5.63881	4.59359	6.40078	6.23875	7.11504	7.60114	5.5463	5.87367	4.7894	6.19117	6.58001	5.94646	5.16098	5.99734	5.99455	7.00844	5.97529	6.20409	5.67761	4.94886	4.37115	6.40947	7.28512	5.91847	6.20867	6.20409	7.69189	6.67282
MNS1	4.61805	5.22386	6.05279	4.1169	7.06113	6.48481	4.93249	5.60976	6.02367	6.37748	6.19799	6.30227	3.91418	4.9231	6.88423	6.81605	6.18726	6.04435	5.18954	5.86993	5.07332	5.03554	7.47228	6.05694	5.98567	5.85521	5.16757	6.22134	5.91647	5.08604	4.34627	4.72432	5.67474	6.00451	4.51406	7.32645	5.50875	5.72619	5.83379	5.91819	5.2321	4.88293	5.57479	5.36888	4.55883	5.59606	4.57491	6.64388	6.24085
SLC3A1	8.80659	5.56958	5.91102	6.43815	8.24141	9.54431	8.49395	6.04361	7.65021	8.91024	9.30529	8.72284	5.4313	8.08513	8.62119	8.55389	6.67783	9.25075	7.7869	9.06233	6.4302	8.0617	8.69771	6.7406	7.58504	7.43444	6.72683	7.74382	9.77139	8.83131	7.99496	7.63274	8.35875	9.10666	7.53242	8.06221	7.46034	8.71027	7.55337	8.00536	6.05561	4.62609	8.64523	6.04015	3.71873	8.53226	8.60855	9.81601	8.68524
ABCA12	3.32528	3.2474	3.50467	4.14328	5.50201	3.8792	3.54703	3.36689	4.81965	3.58734	4.18132	3.7322	3.5585	3.68942	3.87038	4.00953	4.60296	3.94365	6.29906	3.57881	3.94322	3.73845	5.67831	5.48871	4.01893	4.7173	4.56153	4.46143	3.74985	3.953	4.32854	3.66608	6.34781	3.83422	3.76877	3.12554	4.12118	4.25683	4.95052	3.95756	3.55349	4.21477	4.59623	3.46217	3.29855	4.77795	4.01494	3.84403	4.48031
LYVE1	6.02342	6.25378	5.91226	6.62356	6.27483	6.05079	5.08628	5.43062	6.63414	5.53243	10.9519	5.74446	4.46398	4.88313	5.2661	4.83456	5.7973	7.07965	9.07191	5.45197	6.41732	4.79804	4.84022	5.47804	7.42313	7.37926	5.56747	6.35446	6.74847	4.39496	7.58296	8.08294	5.46803	6.86249	5.69618	7.06821	7.12627	5.51946	5.14547	6.01738	6.05233	5.77638	6.23902	5.73026	7.45475	6.07083	5.01035	4.33259	5.82687
AX746823	4.49452	5.24413	6.35061	6.8883	7.60114	5.1764	4.74397	5.98541	6.92474	5.22886	7.66666	5.97141	5.71048	6.23138	4.97284	6.52602	7.07331	6.45545	8.05041	6.02667	7.1259	5.67687	5.43013	4.82004	6.52387	8.24969	7.00074	5.77685	5.64475	5.09108	6.58791	6.36684	6.34402	4.97891	4.74502	5.38835	7.75027	5.35586	7.97153	6.07947	7.33934	7.42123	5.36454	7.5733	8.80066	6.72624	4.95095	5.78095	5.59232
TSPYL5	8.572	6.92026	6.53356	7.30247	8.84013	6.67694	7.01599	6.30149	7.74332	6.40078	5.60725	6.16105	8.09893	5.495	5.94332	6.87279	4.93229	6.32213	6.05128	7.1276	8.05746	6.64046	5.09375	7.41512	7.08707	6.3157	5.7351	7.42578	8.17721	7.52008	7.28949	6.98552	4.73234	7.4095	5.05093	8.85852	7.7686	6.55698	8.71901	5.49453	7.61613	4.4968	7.94101	5.97895	5.06946	7.31583	7.70955	6.57388	8.72362
HCG11	4.46039	3.3274	4.17345	4.62259	5.31167	4.01577	3.54209	4.43839	4.68022	4.92458	3.38086	4.58156	4.66169	3.32036	3.42043	4.42409	3.24126	4.43393	3.53626	3.14987	4.17645	3.53119	5.78991	5.25072	5.04243	3.91245	5.34934	4.95243	3.6338	3.58807	3.89829	4.14432	4.21052	4.33445	3.8821	5.29326	4.82922	5.17932	4.68043	4.52535	3.78282	3.74145	4.61042	4.30334	3.75281	4.55863	4.56233	4.27529	4.85336
C16orf89	5.28782	5.13781	5.10861	4.93904	5.16343	4.97586	6.11476	5.32866	5.17779	5.18843	4.96196	5.47485	7.33737	11.142	5.04349	4.92395	5.05808	4.85964	5.22296	5.51781	4.82922	5.30425	5.47804	6.54171	5.31029	4.9659	5.11325	6.23188	5.59702	5.41345	5.05271	5.07376	5.29591	6.45488	5.61379	5.61793	6.21596	5.09732	5.13962	4.81488	7.6054	5.18445	5.06793	5.12032	5.09881	5.13725	10.0153	5.01205	5.22435
CDCA2	6.36027	5.5621	5.81171	8.36134	8.07035	6.56621	5.42002	5.25901	5.87979	6.53383	7.49963	6.75384	4.61214	4.24293	7.26865	6.50271	6.69744	7.16767	7.33398	6.38691	6.92281	6.94823	5.50429	4.30834	6.63843	7.01599	6.44673	7.23806	6.49399	4.31998	8.05746	6.10831	6.85128	6.41104	6.99352	4.07583	7.13044	7.5076	5.82287	7.45824	6.29599	7.39489	7.57413	6.10958	5.48334	8.01941	4.55253	7.75075	7.5226
IGLJ3	6.23493	7.58548	6.88358	6.77148	5.38077	7.00877	6.68802	9.47206	5.81049	5.26769	6.60888	6.64876	5.71886	7.20138	5.1873	9.67925	6.08814	5.60385	8.08568	6.97374	5.4899	6.9777	5.50223	5.66549	5.53654	5.3904	8.30546	6.02835	6.54654	5.85996	5.73939	6.32896	6.53441	6.02141	6.40919	5.8328	6.95113	5.62913	7.90184	6.48011	6.94978	7.21172	5.94944	8.93745	5.60192	5.75855	6.7145	6.73183	6.21674
COL6A3	8.98222	11.5893	12.2139	10.57	8.50162	9.8046	8.57866	11.0553	12.2139	8.41619	8.59337	9.0067	7.07295	5.21023	6.96416	8.74617	9.67413	9.43851	9.90612	10.2427	10.8249	8.40325	8.89699	6.05853	11.2753	10.1223	8.17721	9.76972	10.7553	6.17124	10.2532	9.5397	7.91124	8.49943	10.4224	8.90753	11.5212	8.67599	10.8889	9.03628	11.5293	11.9829	7.07899	11.5378	12.5629	10.0264	6.07154	6.27225	8.15727
FAM169A	4.16226	3.86698	3.76427	3.95653	3.77085	4.36572	6.6149	4.14695	3.85687	4.13361	3.92996	4.31572	7.79402	3.72236	4.52419	4.09072	3.62292	4.00519	3.68777	3.94806	3.93866	4.39715	5.80713	3.68777	3.76088	3.80923	4.1036	5.01226	4.14677	6.05155	3.74011	3.76608	5.06793	4.8034	3.36865	7.10341	3.93095	3.74215	3.99915	4.15721	5.30913	3.85984	3.78792	4.4286	3.68551	3.75862	5.41213	4.43962	4.0337
HLA-DPB2	4.17384	5.84395	4.73004	3.78589	4.09931	4.08688	3.55097	4.82345	4.77435	4.44002	5.31259	4.92502	3.73018	3.35555	4.10897	5.33255	4.97393	4.23732	4.3153	4.43758	3.42554	4.78456	3.53707	3.849	5.67568	4.68128	5.56045	4.13758	4.56213	3.76357	3.89193	4.03531	3.86891	4.09703	3.48692	3.53598	4.82324	3.93587	4.20991	4.25622	3.72675	3.66301	5.21023	6.27824	3.48267	4.5679	4.08138	6.44054	5.91025
PTGER3	4.24017	5.58972	3.99873	3.94576	4.29306	4.45129	5.60313	4.10538	4.17607	6.07302	4.26362	5.74662	7.64859	4.84297	5.09621	4.85119	4.08099	5.21397	3.96122	4.22737	4.1222	3.99725	4.47424	4.34072	4.65473	6.10105	4.55761	5.13826	4.32076	3.88397	5.28335	5.29281	6.09979	5.67546	4.69774	6.62903	4.88966	5.1822	4.17947	4.73467	4.83537	4.01494	5.31627	4.16226	4.11812	4.18311	3.91348	4.15002	4.80609
MCHR1	5.03036	4.61406	4.58644	7.04935	4.77229	4.34465	4.35351	4.39614	5.73963	4.38897	4.53374	5.36952	4.4054	4.59421	4.56895	6.45463	4.65238	5.53991	4.59957	4.93527	8.98317	5.00215	4.70721	4.98684	4.78105	5.97405	4.43249	4.18878	4.58686	4.32728	4.57592	5.04222	6.58001	6.1108	4.90518	4.49887	4.73858	4.62363	4.84228	4.46827	5.0716	4.49432	4.46971	4.39574	4.80427	4.94246	4.88293	4.56418	4.35592
ANO5	5.1755	4.4239	4.59957	5.83934	5.25776	4.62318	6.65664	4.05606	4.14898	3.82893	3.92684	3.83529	7.88672	6.62638	4.35175	4.86601	3.82153	5.2883	4.10602	4.47014	5.79947	4.17262	3.7078	7.36629	4.13131	4.0744	4.16207	4.71311	5.09441	5.9765	4.43352	4.10558	3.75522	4.65884	3.6899	6.49483	3.77243	3.86283	4.58747	3.95341	4.84127	4.1504	3.94765	4.39317	3.96058	4.09317	7.20811	4.08929	3.91055
IGK	5.88199	6.98411	5.69274	6.19342	5.16955	6.21855	5.87249	7.94152	5.80978	5.20619	6.00378	6.26295	5.47551	6.32951	4.85549	9.64556	5.5994	5.49153	8.44474	6.24085	5.23884	5.91176	5.16364	5.22807	5.42464	5.34089	6.85343	5.58127	5.87904	6.11602	5.62848	5.61334	7.10341	5.97381	6.79906	5.5148	5.90831	5.44132	6.95499	6.00108	6.62527	6.84423	6.14265	7.97207	5.49408	5.47642	6.01051	5.84732	5.70979
E2F8	3.31085	5.29992	5.58265	5.00482	5.85521	6.25566	5.33276	4.14595	4.60999	4.18208	4.45792	4.14103	4.69081	3.42218	3.76152	4.7239	3.80221	4.69475	5.07506	4.34848	3.51583	4.62158	4.7292	3.47736	4.29683	3.76675	5.11811	4.11929	3.8211	3.55276	4.12862	3.35555	4.06427	3.53707	3.41117	3.32153	3.92956	3.3397	4.72061	4.21782	4.6044	4.73256	3.71222	6.25566	4.03999	4.41154	3.58411	3.8105	3.42498
PVRL3	5.23123	7.39915	7.45191	4.05966	5.49715	6.37832	6.93512	5.34496	6.20486	7.32114	5.29191	7.20631	8.28062	6.62034	7.14859	6.04636	4.63728	6.58286	5.15813	6.48178	6.28371	5.67474	6.86433	7.31164	5.70164	6.4116	6.95145	5.65062	6.29156	5.24391	6.26682	6.00602	4.88966	7.06384	4.49907	6.11706	5.96989	6.94978	5.66101	5.87783	5.15211	5.46733	7.0068	5.8564	5.87708	5.63927	6.21464	8.3316	7.46678
HS3ST2	6.66044	6.53467	4.99632	7.12937	6.99056	7.5813	6.73183	4.73467	5.89234	5.05314	6.73183	5.23145	4.99718	7.16692	4.76876	5.06188	4.89635	6.3224	6.29658	7.76142	6.67493	5.92987	5.1665	6.03653	8.81749	5.12371	6.07354	6.39785	8.57866	8.20463	6.13457	6.33405	6.68895	5.07181	6.41457	4.68618	7.3945	5.06772	5.15146	5.94746	5.06008	4.69349	5.74803	5.76067	5.49852	7.44202	5.5439	4.76918	6.6273
TMPRSS3	4.46361	5.14967	4.50626	8.22401	6.15634	4.45212	5.94451	4.5476	5.16297	4.29134	4.33893	4.8278	4.23997	4.48421	4.34299	6.13279	4.58156	4.90818	4.48617	5.64044	8.06531	5.64044	4.17467	4.24274	4.21316	5.00482	5.44361	5.04092	5.73389	4.2369	5.16496	4.34994	5.06119	4.46521	4.10341	6.24005	4.54336	4.82092	5.80472	5.08736	6.55612	4.88372	4.2795	5.65785	4.32604	4.5778	4.57285	5.34066	4.37057
ALPI	4.71415	4.8138	4.5556	5.33404	4.99161	5.00107	4.76169	4.70024	4.38004	5.14311	4.36592	4.26951	4.67395	5.0592	4.60771	4.26627	4.56172	4.55273	4.65048	5.74082	4.41093	4.38612	4.67864	4.3477	4.31172	4.43474	4.51856	4.39634	7.32114	5.24413	4.57244	4.40967	4.44406	4.87027	4.64144	4.40421	4.53576	4.68043	5.11039	4.55989	4.49985	4.69731	7.26078	4.46827	4.64103	5.33999	4.47385	8.12187	8.39159
TRHDE-AS1	4.59869	3.90822	3.91613	3.73845	3.92188	4.52438	4.11563	3.65138	4.79824	5.11946	4.25887	5.47507	5.12287	3.96353	5.39773	4.98882	3.87126	5.44477	3.89789	3.71146	5.30783	4.59768	4.89141	5.88174	4.85638	5.34843	3.67817	5.05445	4.08628	7.33132	4.65093	4.5677	6.72866	5.49015	4.10139	5.85544	5.2404	5.14098	3.78437	5.91321	5.00149	3.53449	5.33276	3.91286	3.80633	4.17467	5.84196	4.00679	6.4243
PCDHB2	5.6036	4.54153	6.92415	5.86559	4.17704	5.21973	4.57285	5.27069	4.8015	4.07724	4.94886	5.53099	3.65233	3.85388	4.1851	4.55012	5.74637	4.95987	4.28652	4.47909	6.95079	4.1918	4.54049	4.00147	4.85424	4.557	5.49619	4.3143	5.30535	5.03772	4.41511	4.52515	3.83043	5.9462	4.1394	4.31958	4.11016	4.4173	3.93418	4.03775	4.66271	4.64438	5.58172	5.54701	4.39553	4.05948	5.59677	3.87422	5.96795
TMEM139	7.8227	5.73722	4.86136	7.12414	7.39567	8.15901	7.37771	4.30006	6.09428	8.0747	4.51428	6.63125	5.95776	7.93142	8.46177	6.78689	5.47706	6.92958	4.33509	8.63541	5.92794	7.12197	7.30282	7.87427	6.77119	6.44588	6.37027	7.45112	8.16243	9.38313	5.71458	6.72837	7.78975	8.18477	5.9359	8.01222	6.07798	7.19316	7.43885	7.65673	5.85021	4.37195	7.81027	6.03228	4.22617	7.8997	7.51605	8.62119	7.91828
IGLL3P	7.59727	11.8103	8.69209	9.50937	6.85785	10.1561	9.06337	11.8366	8.03393	7.08467	9.4835	9.50792	7.14304	10.9663	6.99879	12.7369	7.65632	7.84696	10.537	11.7872	7.65552	11.6165	7.63138	7.25041	7.64341	6.989	12.1434	8.32727	9.95038	8.69771	7.95121	8.96125	9.03415	8.06268	9.31262	8.12187	9.61073	7.41223	11.0771	9.69802	10.8207	11.752	8.37617	11.7303	7.36133	7.39724	8.82948	8.88227	8.41944
PCDH17	8.03283	7.22939	6.63125	8.6445	8.60279	8.37935	7.11388	8.01558	9.8142	9.02123	7.69682	8.72452	6.59105	5.34657	8.49188	7.39107	6.19971	8.42198	6.70664	8.58372	8.61892	8.43256	6.37082	4.71311	9.05716	7.5496	6.20274	8.17488	7.55419	4.23628	8.76255	8.27043	6.30626	7.20387	8.81344	5.3361	9.14057	8.22519	7.9446	7.8818	8.05746	6.28421	7.43599	7.52798	9.08581	7.92746	4.59564	5.18265	7.86929
SLC16A14	7.16063	5.71383	5.58623	7.54629	7.08137	7.26288	6.09552	7.38491	6.75174	6.75443	5.34089	6.46472	5.30848	5.48589	6.54288	5.80858	3.8787	6.92546	5.06537	6.07428	7.2197	5.2867	5.24953	4.29564	6.88078	5.51364	5.4894	6.05927	5.08278	4.96738	6.32581	6.29875	4.54415	5.63686	4.09379	7.00439	6.09353	5.75169	6.30964	6.54374	5.9157	4.71292	5.38879	5.8921	4.53023	6.11231	4.66557	4.60666	6.64017
SFRP1	4.3553	5.21443	5.37574	3.89236	3.93498	4.7311	4.35613	4.82092	4.01156	4.22537	4.03307	4.93696	4.44002	6.29238	3.90148	3.91442	4.03716	4.04104	4.59726	4.38385	3.842	4.42108	4.96738	4.0899	4.02941	3.84272	3.91525	6.27538	5.10531	4.2172	4.03634	4.84588	4.02329	5.98541	4.17241	7.17116	4.96284	4.19141	4.60317	4.06239	6.08736	4.22776	4.10917	4.13542	4.07999	4.26607	4.07683	3.82804	3.96142
PCDHB6	7.57453	4.68517	5.1271	5.22546	5.99384	5.82801	4.93632	5.27138	5.54462	5.11877	5.26499	6.01388	4.28292	5.80472	4.64396	6.20017	5.67924	6.52575	4.40845	4.56608	5.02494	4.63025	5.99131	5.04602	5.5463	7.2946	6.6752	6.01689	5.58623	6.62123	5.31538	6.84665	4.65805	5.33068	7.00473	5.20127	6.66906	7.87782	5.11946	6.1227	4.94267	4.83767	4.99418	4.61064	5.73312	5.79704	5.9928	7.90933	4.69183
SLC44A3	8.29811	6.16633	5.07138	8.21701	8.11276	7.75955	6.7102	6.73971	7.3386	7.63318	6.36601	7.90636	6.38775	7.80083	8.02591	7.96364	5.45685	7.85329	5.29791	6.86496	6.95659	6.24134	8.06424	7.62746	6.78932	7.75489	5.74875	7.50477	6.10706	7.43211	6.58956	7.33063	8.25643	8.12924	5.1601	7.16275	6.31544	7.67494	6.43104	6.80937	6.69892	4.32832	8.06373	6.39286	4.25787	6.10404	6.89809	6.98868	7.36821
ZNF423	7.23297	4.97173	6.32188	7.32229	6.11255	7.19957	6.42247	6.3046	7.71901	6.48822	4.9452	6.81702	5.40067	4.90733	5.94404	5.15878	4.95772	7.20065	5.6959	7.20528	7.6856	6.40975	5.53525	5.94895	7.0756	5.3666	4.65805	6.55189	6.01879	4.18917	6.69572	7.02808	4.5603	6.0202	6.87148	6.17832	7.61572	6.86776	6.88892	6.23927	7.85131	4.95158	5.60217	5.24085	5.92891	5.7997	6.7433	4.29051	5.86947
APCDD1	7.96847	7.67112	6.22883	7.37851	7.3659	6.19405	6.47436	7.57921	7.74613	6.62266	6.74877	7.21207	7.06215	3.9399	6.96959	5.95926	5.52963	6.99025	6.27483	6.71948	8.0612	6.62495	5.51669	8.27043	8.21165	6.99879	6.18189	6.30383	5.98021	4.02577	7.69985	6.2658	5.85591	6.66737	8.03232	8.09156	7.68835	7.70163	7.155	7.73876	9.29778	6.62495	6.37317	6.95045	6.15432	7.83174	5.08214	5.17999	7.83703
WISP2	4.57552	5.96454	5.12224	5.3034	4.64355	6.34618	5.66216	7.42198	5.29415	4.63127	8.0493	5.04071	4.55353	4.97479	4.64438	7.87427	8.07963	5.09201	6.20867	6.79174	6.15357	4.54781	4.93485	4.62587	7.33737	6.66101	5.63477	5.07805	5.10373	4.80794	5.89571	5.08106	8.73896	4.80107	7.23554	5.01035	6.30012	4.82448	5.71313	5.35168	7.12521	5.4522	5.03404	5.90904	4.84272	6.12088	5.19752	4.61952	4.97782
MINOS1P1	5.25616	3.84726	5.82947	5.99636	5.61288	6.1043	5.6733	6.66737	5.19376	6.61721	4.86224	6.92124	5.62191	5.26632	7.59599	6.52111	5.45662	6.82858	5.624	6.82069	7.57413	6.28864	6.85749	6.3346	5.74446	6.00403	6.07947	7.16767	5.63758	6.6218	6.39374	6.17095	4.48379	6.63496	4.57992	5.79632	6.25486	6.60202	5.75259	7.05984	5.82613	4.65784	5.61359	7.38793	6.02216	5.6871	6.14215	6.59043	6.70664
CASC1	3.83594	3.34239	3.42187	3.70897	5.70308	4.66958	3.38588	3.34653	4.04993	5.17664	3.21042	5.13401	3.4347	5.13557	5.8849	5.59677	3.36312	4.91177	3.18176	4.04402	4.72432	3.94702	4.96845	4.8912	4.60126	4.39416	3.29949	4.66958	4.42409	5.66405	4.46242	3.53449	5.51222	4.58236	3.57631	4.79741	4.29762	4.95335	3.68777	5.3334	3.96099	3.15965	4.11116	3.27008	3.29125	4.17488	3.76242	4.60044	4.99204
[truncated: 3,407 more rows]
[truncated: 216 more columns]
