# Supplementary material for: Identification of biomarkers related to CD8+ T cell infiltration with gene co-expression network in clear cell renal cell carcinoma
Source: Aging (Albany NY). 2020 Feb 20;12(4):3694–712. doi: 10.18632/aging.102841 (PMC7066925; doi:10.18632/aging.102841)
Supplement: Supplementary Table 2 [file aging-12-102841-s002..xlsx]

## Sheet: Supplementary Table 2
Supplementary Table 2. The fractions of six subtypes of T cells in every sample.
ID	T_cells_CD8	T_cells_CD4_naive	T_cells_CD4_memory_resting	T_cells_CD4_memory_activated	T_cells_follicular_helper	T_cells_regulatory	T_cells_gamma_delta
GSM1930996	0.169355	0	0	0	0.00854063	0.059891	0.0707627
GSM1930997	0.350622	0	0	0.0236628	0.0543821	0.00650943	0.0820108
GSM1930998	0.0739481	0	0.0710913	0.00265239	0.0588684	0.0214985	0.0961851
GSM1930999	0.0127429	0	0.291364	0	0.011396	0	0
GSM1931000	0.0578993	0	0.0608659	0	0.0450955	0.0386058	0
GSM1931001	0.121734	0	0.151388	0	0.0222791	0	0.0741215
GSM1931002	0.130417	0.00404747	0.0301144	0	0.0431545	0.0538153	0.0485649
GSM1931003	0.0983106	0	0	0.0177288	0.0636112	0.0325436	0.0983674
GSM1931004	0.0668356	0	0.201093	0.0208999	0.00510975	0.00416052	0.119004
GSM1931005	0	0	0.271087	0	0.00655424	0	0.0687896
GSM1931006	0.191253	0	0	0	0.078577	0.0161648	0.0897947
GSM1931007	0.338102	0	0	0	0.0842547	0	0.168824
GSM1931008	0.117494	0	0.116997	0	0.101502	0.0265798	0
GSM1931009	0.120822	0	0.0221944	0	0.0735989	0.036587	0.0209663
GSM1931010	0.228189	0	0.00180705	0	0.0908843	0.0102606	0.262546
GSM1931011	0.0776098	0	0.0803502	0	0.0287754	0	0.113985
GSM1931012	0.231141	0	0	0	0.0708172	0.108446	0.0879274
GSM1931013	0.0341711	0	0.180113	0.00295805	0.00966662	0	0.125172
GSM1931014	0.162938	0	0	0.00893774	0.0657783	0.0972389	0.0184982
GSM1931015	0.134909	0	0.00412969	0	0.046849	0	0.297298
GSM1931016	0	0	0.0769241	0	0.0249362	0.115227	0
GSM1931017	0.36598	0	0.0126371	0	0.0584217	0	0.239819
GSM1931018	0.0266667	0	0.113472	0	0.050313	0.0288024	0
GSM1931019	0.229904	0	0.0565515	0	0.0165773	0.109354	0.0159041
GSM1931020	0	0	0.159911	0	0.0306024	0.0301221	0.0428606
GSM1931021	0.0133177	0	0.145697	0	0.0520103	0	0.0396984
GSM1931022	0.209179	0	0	0.0514104	0.043138	0.00416867	0.114363
GSM1931023	0.0998304	0	0.20255	0	0.0294557	0	0.148193
GSM1931024	0.281983	0	0	0	0.0831599	0	0.165936
GSM1931025	0.093135	0	0.0273519	0	0	0.0329911	0.0548267
GSM1931026	0.0441285	0	0.126484	0	0.0271879	0.00971583	0.129639
GSM1931027	0.0354374	0	0.168374	0.00818752	0	0	0
GSM1931028	0.0735916	0	0.124366	0	0.0437779	0.040165	0.0291736
GSM1931029	0.091427	0	0.0543575	0	0.0347674	0.0309265	0.00896473
GSM1931030	0.171123	0	0.189914	0	0.00953981	0.0178325	0
GSM1931031	0.0792666	0	0.110497	0	0.0181496	0.0994562	0.182365
GSM1931032	0.111518	0	0.0552049	0.00507809	0.067516	0.0204389	0.137247
GSM1931033	0.0987014	0	0.128934	0	0.0079435	0.0331858	0
GSM1931034	0.26506	0	0.0142998	0	0.0903639	0.0492319	0.148828
GSM1931035	0.404296	0	0	0	0.0399808	0.0261288	0.116494
GSM1931036	0.171015	0	0.18237	0	0.0101279	0.00173353	0.0439381
GSM1931037	0.27235	0	0	0.00977995	0.0912653	0.00832484	0.217719
GSM1931038	0.049168	0	0.141631	0	0.0449606	0.00437144	0
GSM1931039	0.357845	0	0	0.0142626	0.0653581	0.0388688	0.149345
GSM1931040	0.0269566	0	0.0812205	0	0.0773855	0.00946323	0
GSM1931041	0.0796394	0	0.0102819	0	0.0457448	0.0474979	0
GSM1931042	0.237527	0	0	0.00557594	0.0627539	0.0218382	0.127109
GSM1931043	0.396858	0	0	0	0.0526062	0.0591229	0.145232
GSM1931044	0.311798	0	0	0	0.0857709	0.0213074	0.113231
GSM1931045	0.0924706	0	0.0717927	0	0.0167499	0.0301921	0.0388428
GSM1931046	0.10533	0	0.108598	0	0.0508157	0.00791869	0.105232
GSM1931047	0.0615944	0	0	0	0.0798914	0.023163	0.0247752
GSM1931048	0.206538	0	0	0.016241	0.0177046	0	0
GSM1931049	0.156628	0	0.206321	0	0.0630425	0.0230143	0.0346235
GSM1931050	0.139037	0	0.0439495	0.0154447	0.0316542	0.010422	0.112648
GSM1931051	0.0883001	0	0.164271	0.0107358	0.0536352	0	0.238224
GSM1931052	0.00287352	0.016798	0.0802888	0.00614701	0.0130402	0.0148529	0
GSM1931053	0.115996	0	0.111111	0	0.042677	0	0.0819003
GSM1931054	0.115613	0	0.00691364	0	0.110398	0.0149067	0.101558
GSM1931055	0.27774	0	0.023186	0	0.0994298	0.0245502	0.132655
GSM1931056	0.227404	0	0.0197507	0.00944177	0.0933929	0	0.190582
GSM1931057	0.331161	0	0	0.0264011	0.0968988	0.0232943	0.15933
GSM1931058	0.224732	0	0.025846	0	0.0324285	0	0.135255
GSM1931059	0.124247	0	0.0681597	0.00376409	0.0514683	0.0398089	0.0373482
GSM1931060	0.234426	0	0.0644745	0	0.0541098	0.0215136	0.0507585
GSM1931061	0	0	0.0726578	0	0.0690896	0.0290235	0.134211
GSM1931062	0.302428	0	0	0.0411105	0.0642456	0.0241889	0.12257
GSM1931063	0.0643237	0	0.139783	0	0.0991249	0.0212499	0
GSM1931064	0.0345363	0	0.136714	0	0.00865976	0	0
GSM1931065	0.10977	0	0	0.0179158	0.0720318	0.00689275	0.0938353
GSM1931066	0.157601	0	0	0	0.0597064	0.0450886	0.0476764
GSM1931067	0.0260065	0	0.0702972	0	0.0862757	0.0319397	0.0294794
GSM1931068	0.350047	0	0	0	0.0716054	0.0325195	0.083875
GSM1931069	0.169225	0	0.0258249	0	0.0708651	0.0255083	0.0468123
GSM1931070	0.0694712	0	0.112704	0	0.0616728	0.0367046	0
GSM1931071	0.0939184	0	0.0431011	0	0.0345232	0.0293415	0
GSM1931072	0.36334	0	0	0.139466	0.034602	0.000449123	0.255418
GSM1931073	0.0637052	0	0.212847	0	0.00744823	0.00205893	0.0950966
GSM1931074	0.102928	0	0.0776034	0	0.00842625	0.0422477	0.158276
GSM1931075	0.0496687	0	0.0446644	0	0.115061	0.0330717	0
GSM1931076	0.105089	0	0.0820619	0	0.0305847	0.0377876	0
GSM1931077	0.199641	0	0.00509679	0.0735056	0.0451251	0	0.15166
GSM1931078	0.26424	0	0.0404317	0	0.0395455	0	0.179928
GSM1931079	0.424638	0	0	0	0.149506	0.0316561	0.0411042
GSM1931080	0.155142	0	0.0404792	0	0.0571326	0	0.0638835
GSM1931081	0.0740516	0	0.0689592	0	0.0862471	0.119382	0
GSM1931082	0.0919259	0	0.116829	0	0.104901	0.00258618	0.0962226
GSM1931083	0.0766213	0	0.0243846	0	0.0571763	0.0342591	0
GSM1931084	0.0630579	0	0	0	0.0928989	0.027982	0.0801424
GSM1931085	0.159169	0	0.119253	0	0.0193636	0.00725377	0.0125142
GSM1931086	0.339811	0	0.0249191	0	0.093101	0.0217866	0.0561317
GSM1931087	0.278377	0	0	0	0.0806083	0.0210022	0.100593
GSM1931088	0.422809	0	0	0	0.0729434	0.0550033	0
GSM1931089	0.00767377	0.165987	0.00270616	0	0.00533492	0.223319	0
GSM1931090	0.277712	0	0.00588314	0	0.0586795	0.0615152	0
GSM1931091	0.278429	0	0	0	0.0727767	0.0622972	0.014146
GSM1931092	0.192018	0	0	0	0.0535823	0.028079	0.073335
GSM1931093	0.158879	0	0.232247	0	0.0240331	0.0502582	0.0318709
GSM1931094	0.090373	0	0.070701	0	0.0572532	0.0532178	0
GSM1931095	0.094259	0	0.116329	0	0.0435484	0.0989376	0
GSM1931096	0.000505721	0	0.350078	0	0	0	0
GSM1931097	0.152304	0	0.0876917	0	0.0531701	0.000725715	0.149941
GSM1931098	0.147896	0	0.112686	0	0.0769492	0.0264353	0
GSM1931099	0.0904963	0	0.0774359	0	0.0581429	0.0279601	0.0549967
GSM1931100	0.137633	0	0.0612452	0	0.0811879	0.00235633	0.0769504
GSM1931101	0.389235	0	0	0	0.0947581	0.0069917	0.172616
GSM1931102	0.0776727	0	0.199417	0	0.0498433	0.0262472	0
GSM1931103	0.120367	0	0.201031	0	0.0604115	0.0288159	0
GSM1931104	0.0687498	0	0.254588	0	0.0286133	0.0504702	0
GSM1931105	0.217789	0	0.0569076	0	0.0460955	0.0407838	0
GSM1931106	0.135067	0	0.17393	0	0.0166113	0.0231403	0
GSM1931107	0.129826	0	0.143308	0	0.00934859	0.0145038	0.0671186
GSM1931108	0.328358	0	0	0	0.0582896	0.0128715	0.127424
GSM1931109	0.0975296	0	0.313474	0	0.0294264	0	0.0629978
GSM1931110	0.284898	0	0.140936	0	0.0173604	0.018259	0
GSM1931111	0.422528	0	0	0	0.0644883	0.000797073	0.0752859
GSM1931112	0.246488	0	0.0201866	0	0.0437196	0.0248425	0.0248091
GSM1931113	0.0969652	0	0.00283815	0	0.0639847	0.0365879	0.018088
GSM1931114	0.220134	0	0.181363	0	0.0211075	0.0233574	0
GSM1931115	0.0994492	0	0.0716029	0.00695395	0.0451155	0.0515246	0
GSM1931116	0.164062	0	0	0	0.0878513	0.0270219	0.0406697
GSM1931117	0.213119	0	0.0633139	0	0.0447923	0.0826761	0.00700275
GSM1931118	0.105847	0	0.063287	0.0107424	0.0406153	0.0175771	0.0704981
GSM1931119	0	0	0.154413	0	0.0359889	0.0237262	0.0786796
GSM1931120	0.0377803	0	0	0	0.0708772	0.025562	0.0448267
GSM1931121	0.01556	0	0.242603	0	0.0012923	0.0237563	0
GSM1931122	0.011054	0	0.112215	0	0.0425687	0	0.0397938
GSM1931123	0.0914935	0	0.155654	0	0.0348659	0.0699656	0
GSM1931124	0.119636	0	0.0618322	0.00973093	0.0304068	0.00353955	0.0169861
GSM1931125	0.234585	0	0	0	0.0892083	0.0396463	0.158298
GSM1931126	0	0	0.131981	0	0.0539857	0	0.0182381
GSM1931127	0.226883	0	0.0277071	0	0.101227	0	0.252712
GSM1931128	0.0532225	0.021856	0.17909	0.00230982	0.00929761	0	0.00691606
GSM1931129	0.0936094	0	0.0797069	0	0.0332089	0.0315653	0.029398
GSM1931130	0.0514861	0	0.0447194	0	0.0899223	0.0503997	0.0786147
GSM1931131	0.148417	0	0.00978384	0	0.0553306	0	0.411042
GSM1931132	0.12242	0.0171825	0	0	0.107166	0	0.337916
GSM1931133	0.138867	0	0.140889	0	0.0384064	0	0.0951521
GSM1931134	0	0	0.160989	0	0.0581747	0.0184884	0.0860876
GSM1931135	0.33603	0	0.0377743	0.00170342	0.0239417	0.00662386	0.0216595
GSM1931136	0.166287	0	0.0140453	0	0.0590188	0.0511857	0.0937332
GSM1931137	0.0161821	0	0.154608	0	0.0398255	0.0266536	0.00295399
GSM1931138	0.00101438	0	0.244555	0	0.0547888	0	0.102983
GSM1931139	0.167466	0	0.0934793	0	0.0165437	0.020769	0
GSM1931140	0.389778	0	0	0.0431864	0.0631096	0	0.198775
GSM1931141	0.0389657	0	0.0982335	0	0.0239698	0.0298035	0
GSM1931142	0.502392	0	0	0	0.0611696	0.0257636	0.143458
GSM1931143	0.0580779	0	0	0	0.162233	0.0019513	0.0507722
GSM1931144	0.31981	0	0.00236531	0	0.0859247	0.000564779	0.00289619
GSM1931145	0.0484481	0	0.235998	0.00194556	0.0196436	0	0.0907767
GSM1931146	0.0572224	0	0.103092	0	0.0417627	0	0
GSM1931147	0.0678455	0	0.0991517	0	0.0784687	0.0408436	0
GSM1931148	0.115156	0	0.0795681	0	0.0702684	0.0567455	0.139196
GSM1931149	0.227919	0	0	0.016945	0.0207776	0	0.0232285
GSM1931150	0.299896	0	0	0	0.0648649	0.0187545	0.166962
GSM1931151	0.00905643	0	0.0383524	0	0.0894054	0.0311633	0.0406172
GSM1931152	0	0	0.156418	0	0.0968936	0.0159107	0.041495
GSM1931153	0.248939	0	0.00646953	0	0.0694616	0.00874769	0.139722
GSM1931154	0.130157	0	0.0304468	0	0.0921693	0.065995	0
GSM1931155	0.282794	0	0	0.00113162	0.0503732	0	0.1506
GSM1931156	0.0749856	0	0	0.00813055	0.0330147	0.0181804	0.121719
GSM1931157	0.0667599	0	0.131298	0	0.0394754	0.0751193	0
GSM1931158	0.0657039	0	0.209765	0	0.0331888	0	0.0799128
GSM1931159	0.071492	0	0.144572	0	0.0271477	0.0475452	0.117261
GSM1931160	0.189937	0	0	0	0.108866	0.0256386	0.152387
GSM1931161	0.226227	0	0.0273186	0	0.113244	0	0.147159
GSM1931162	0.0715324	0	0.0762221	0	0.0684019	0.0262567	0.137872
GSM1931163	0.142229	0.136506	0.0314571	0.0283795	0.0208302	0.0157296	0.173404
GSM1931164	0.238184	0	0	0.0142576	0.074449	0.0357591	0.102443
GSM1931165	0.146959	0	0.0812483	0	0.0733716	0.0290486	0.14714
GSM1931166	0.170295	0	0.0197386	0	0.0275731	0.103619	0.0133795
GSM1931167	0.0391209	0	0.0692069	0.00866547	0.031401	0	0.122935
GSM1931168	0.201453	0	0	0.0691505	0.033931	0.0140835	0.0963243
GSM1931169	0.0899014	0	0.0816674	0	0.0215376	0.020182	0
GSM1931170	0.072087	0	0.14694	0	0.0576718	0	0.0275763
GSM1931171	0.216417	0	0.0478951	0	0.0793766	0.0248865	0.198949
GSM1931172	0.447529	0	0	0.020225	0.0677602	0	0.136367
GSM1931173	0.0161433	0	0.179952	0	0.0549357	0.0285625	0
GSM1931174	0.183774	0	0.0587099	0	0.0826421	0	0.0175995
GSM1931175	0.0968853	0	0.16674	0	0.0750428	0	0
GSM1931176	0.100962	0.139208	0	0.00139222	0.0289486	0.00197615	0.0623789
GSM1931177	0.289574	0	0.138852	0	0.0827442	0.0176161	0.10606
GSM1931178	0.480896	0	0	0.00140489	0.0597817	0	0.155502
GSM1931179	0.40569	0	0.0650172	0	0.092074	0.0222835	0.019856
GSM1931180	0.0610682	0.00656697	0.18463	0	0.0226922	0	0.00585265
GSM1931181	0.187472	0	0.15682	0	0.0323713	0.0207941	0.0707423
GSM1931182	0.11953	0	0.0995711	0	0.14816	0.0236368	0.0214025
GSM1931183	0.182058	0	0.116004	0	0.0836924	0.0147505	0.0030315
GSM1931184	0.363572	0	0	0	0.0631319	0.0156693	0.147857
GSM1931185	0.173987	0	0.0716849	0	0.111216	0.0297827	0
GSM1931186	0.159537	0	0.163439	0.00146819	0.0551964	0.0111818	0.0181072
GSM1931187	0.0282466	0	0.128571	0	0.0328362	0.0776662	0
GSM1931188	0.0450246	0	0.222226	0.00772448	0.0461969	0.0528596	0
GSM1931189	0.193507	0	0	0.0250347	0.0429675	0.0266957	0.0522932
GSM1931190	0.356005	0	0	0	0.120893	0.0422339	0
GSM1931191	0.529659	0	0	0	0.0609832	0.0469034	0.0693404
GSM1931192	0.267607	0	0.117346	0	0.0237895	0.132726	0
GSM1931193	0.308177	0	0.0504412	0	0.0202311	0.0993249	0
GSM1931194	0.0100841	0	0.151332	0	0.123109	0	0
GSM1931195	0.277973	0	0	0	0.0883907	0.077536	0
GSM1931196	0.348584	0	0	0	0.079774	0.0792554	0
GSM1931197	0.431951	0	0	0	0.0503146	0.085461	0.0390879
GSM1931198	0.0648644	0	0.020637	0	0.055594	0.034773	0.00487815
GSM1931199	0.11217	0	0.108173	0.0070447	0.051134	0.0369034	0
GSM1931200	0.110247	0	0.114724	0	0.0257731	0.0224041	0
GSM1931201	0.355642	0	0	0	0.103462	0.0832515	0
GSM1931202	0.245552	0	0.0364296	0	0.0505946	0.0276347	0.0530749
GSM1931203	0.192148	0	0.0667867	0	0.0871374	0.0874335	0
GSM1931204	0.139558	0	0.0666428	0	0.0436866	0.0275103	0.038029
GSM1931205	0.311703	0	0.0181974	0	0.124407	0.057333	0.0107038
GSM1931206	0.334413	0	0	0.0552333	0.103681	0.00824939	0.0737229
GSM1931207	0.169411	0	0.093724	0	0.0380209	0.0299228	0.0227007
GSM1931208	0.131366	0	0.110509	0	0.0265262	0.0292446	0
GSM1931209	0.151483	0	0.0314651	0	0.0682881	0.0560365	0
GSM1931210	0.345009	0	0	0	0.0604445	0.0581529	0
GSM1931211	0.256099	0	0	0	0.0886124	0.072932	0.113916
GSM1931212	0.251466	0	0.0501345	0	0.0715341	0.0193244	0.138144
GSM1931213	0.273185	0	0.0176839	0	0.0507593	0	0.147407
GSM1931214	0.378631	0	0	0	0.0654516	0.0961207	0.0202367
GSM1931215	0.237728	0	0	0	0.102824	0.0151183	0.237929
GSM1931216	0.233655	0	0.0548791	0	0.144589	0.00891824	0.155924
GSM1931217	0.0277268	0	0.143517	0	0.0402885	0.0208289	0
GSM1931218	0.285072	0	0	0	0.063495	0.014129	0.0183885
GSM1931219	0.123749	0	0.0882097	0	0.0901539	0.034674	0.0121614
GSM1931220	0.212055	0	0	0	0.0518531	0.0643457	0.0299905
GSM1931221	0.224686	0	0.00750697	0	0.100495	0.0367889	0.115416
GSM1931222	0.260848	0	0	0	0.120897	0.0463799	0.0913949
GSM1931223	0.184046	0	0.0456275	0	0.044652	0.0685181	0.0857316
GSM1931224	0.146535	0	0.168712	0	0.0384382	0.0632803	0
GSM1931225	0.177596	0	0.0569341	0	0.0890422	0.0416254	0.118309
GSM1931226	0.312761	0	0	0.0886038	0.0387378	0.0240042	0.0265969
GSM1931227	0.267706	0	0	0	0.0844211	0.0523733	0.033936
GSM1931228	0.150564	0	0.122768	0	0.045817	0.043324	0
GSM1931229	0.210768	0	0.0553398	0	0.112076	0.0206442	0.00121059
GSM1931230	0.203923	0	0.180966	0.0215835	0.0463005	0.0012299	0.0761339
GSM1931231	0.102052	0	0.058084	0	0.106527	0.172653	0
GSM1931232	0.0825824	0	0.0777157	0	0.0523962	0.0647732	0
GSM1931233	0.2649	0	0.0211912	0	0.0823259	0.026242	0.101508
GSM1931234	0.243857	0	0	0	0	0.0403354	0
GSM1931235	0.0193665	0	0.155855	0.00518732	0.011141	0.064603	0.111908
GSM1931236	0.242915	0	0	0.0297159	0.0583348	0.156456	0
GSM1931237	0.274958	0	0.131231	0	0.0106465	0.0955975	0
GSM1931238	0.388427	0	0	0	0.17795	0.0344973	0
GSM1931239	0.238553	0	0.0411675	0.0256404	0.119946	0	0.0582604
GSM1931240	0.233336	0	0.0938841	0	0.0764785	0.0216279	0.0213627
GSM1931241	0.237058	0	0.0294286	0	0.0884309	0.0399246	0.0755225
GSM1931242	0.263504	0	0.0495611	0	0.049849	0.0613423	0.0611777
GSM1931243	0.325912	0	0	0	0.0629565	0.0778932	0.161554
GSM1931244	0.251592	0	0.0207486	0.0391703	0.124761	0.0166885	0
GSM1931245	0.0838736	0	0.331865	0	0.0523261	0.0789398	0
GSM1931246	0.130004	0	0.0672259	0	0.0965588	0.0398793	0
GSM1931247	0.375518	0	0	0	0.109759	0.0246286	0.16381
GSM1931248	0.170077	0	0	0	0.122168	0.0676843	0.0342133
GSM1931249	0.0780188	0	0.146989	0	0.035295	0.064352	0
GSM1931250	0.313227	0	0	0.0220823	0.0742331	0	0.240115
GSM1931251	0.24595	0	0.0556132	0	0.0685549	0.00256423	0
GSM1931252	0.271042	0	0	0.0119972	0.0739114	0.0904196	0
GSM1931253	0.166981	0	0.0566774	0	0.137351	0.0264283	0.0471625
GSM1931254	0	0	0.125549	0.00291269	0.00947123	0.0301187	0.05937
GSM1931255	0.284177	0	0	0.0514075	0.143107	0.0258703	0.0355815
GSM1931256	0.116274	0	0.151921	0	0.0714092	0.108248	0.00822195
GSM1931257	0.281804	0	0	0	0.120881	0.0584587	0
GSM1931258	0.119678	0	0	0	0.094491	0.0107421	0.0668514
GSM1931259	0.185356	0	0.0445504	0.0344726	0.121659	0	0.0497332
GSM1931260	0.27633	0	0.237488	0	0	0.0146039	0.0479673
