# Supplementary material for: Identification of biomarkers related to CD8+ T cell infiltration with gene co-expression network in clear cell renal cell carcinoma
Source: Aging (Albany NY). 2020 Feb 20;12(4):3694–712. doi: 10.18632/aging.102841 (PMC7066925; doi:10.18632/aging.102841)
Supplement: Supplementary Table 3 [file aging-12-102841-s003..xlsx]

## Sheet: green module
Supplementary Table 3. Genes of green module and Matascape enrichment analysis result.
probes	GS.T_cells_CD8	p.GS.T_cells_CD8	MMgreen	p.MMgreen
CXCL13	0.414992	1.87e-12	0.805962	7.92e-62
HLA-DQA1	0.107002	0.0821013	0.114462	0.0627986
MYH8	-0.0415611	0.500529	-0.195907	0.00134984
CXCL11	0.457147	4.33e-15	0.762831	1.01e-51
LINC00844	-0.203954	0.000838954	-0.229675	0.000162134
NDNF	-0.138023	0.0246401	-0.17657	0.00393347
FDCSP	0.0659102	0.285056	0.442737	3.79e-14
IGJ	0.188256	0.00208631	0.568345	4.51e-24
SOSTDC1	-0.125479	0.0412434	-0.355505	2.59e-09
HLA-DRB4	0.239879	8.01e-05	0.255164	2.62e-05
BEX1	-0.058265	0.344759	-0.414087	2.11e-12
SCGB2A1	-0.25434	2.79e-05	-0.309613	2.7e-07
C16orf54	0.363106	1.11e-09	0.864772	1.19e-80
CRTAM	0.366221	7.83e-10	0.85706	1.03e-77
PNMAL1	-0.276832	4.76e-06	-0.238375	8.9e-05
DSP	-0.20256	0.00091218	-0.22895	0.000170274
GBP5	0.443876	3.21e-14	0.913584	9.02e-105
REG1B	0.0233867	0.704718	0.128105	0.0371485
RP1-93H18.6	0.424958	4.8e-13	0.742579	1.09e-47
GPR171	0.209664	0.0005921	0.789289	1.22e-57
ARG2	-0.22484	0.000224087	-0.26284	1.46e-05
DDIT4L	0.0327521	0.595566	-0.202208	0.0009316
DEFB1	-0.211608	0.000524755	-0.371172	4.43e-10
DMKN	-0.290103	1.56e-06	-0.416515	1.52e-12
ZBED2	0.42217	7.06e-13	0.749341	5.41e-49
GZMA	0.449974	1.29e-14	0.873321	4.02e-84
AIM2	0.30401	4.52e-07	0.785641	8.94e-57
ITK	0.386651	7.04e-11	0.894044	1.05e-93
RBM20	-0.173842	0.0045367	-0.18502	0.00249604
EOMES	0.56904	3.87e-24	0.892472	6.53e-93
GZMK	0.616071	4.37e-29	0.889906	1.22e-91
TRAT1	0.417482	1.34e-12	0.895917	1.14e-94
CXCL9	0.517321	1.54e-19	0.828168	4.41e-68
ANKRD22	0.391435	3.91e-11	0.750854	2.73e-49
RSAD2	0.108619	0.0775533	0.443682	3.3e-14
LAG3	0.657686	3.26e-34	0.862941	6.16e-80
CD69	0.153433	0.0123938	0.725011	1.73e-44
THEMIS	0.382445	1.17e-10	0.873919	2.25e-84
CXCL10	0.519042	1.11e-19	0.766867	1.42e-52
IFNG	0.521444	7.04e-20	0.831113	5.58e-69
HTRA4	0.207795	0.000664305	0.561557	2.01e-23
TMEM155	0.417899	1.26e-12	0.770064	2.92e-53
CD27	0.613121	9.45e-29	0.8952	2.68e-94
CYTIP	0.100244	0.103472	0.727785	5.61e-45
PMCH	0.285697	2.27e-06	0.566493	6.81e-24
TOX	0.355313	2.65e-09	0.72391	2.69e-44
ZC3H12D	0.240685	7.56e-05	0.755049	3.98e-50
MS4A1	0.164049	0.00744936	0.5368	3.52e-21
CD8A	0.763107	8.85e-52	0.864881	1.08e-80
BEX2	-0.15355	0.0123266	-0.391263	3.99e-11
NKG7	0.670449	5.92e-36	0.858346	3.42e-78
LY75	0.170981	0.00525805	0.603737	1.04e-27
GZMB	0.339434	1.44e-08	0.772759	7.55e-54
PTH2R	0.0356376	0.563549	0.151518	0.0135436
LOC102725408	-0.212794	0.00048721	-0.176575	0.00393242
LAMP3	0.124233	0.0433161	0.591565	2.09e-26
HLA-DPB2	0.397585	1.81e-11	0.698383	4.4e-40
TMPRSS3	0.0825018	0.180581	0.21378	0.000457928
NLRC3	0.305877	3.81e-07	0.83354	9.88e-70
HAMP	0.238292	8.95e-05	0.404212	7.74e-12
GATA3	0.220132	0.000305092	0.426574	3.84e-13
IDO1	0.210524	0.000561361	0.483123	6.64e-17
CCR7	0.259887	1.83e-05	0.651863	1.9e-33
CD72	0.34604	7.2e-09	0.812711	1.22e-63
LINC00158	0.440729	5.09e-14	0.710709	4.64e-42
RP11-210M15.2	-0.244221	5.87e-05	-0.324022	6.81e-08
AGR3	-0.182672	0.00283781	-0.190208	0.00186979
NAPSB	0.282075	3.08e-06	0.571397	2.28e-24
GPR18	0.346711	6.7e-09	0.83509	3.22e-70
CCL5	0.650773	2.63e-33	0.914802	1.52e-105
AC079767.4	0.0904224	0.142099	0.520264	8.81e-20
LAIR2	0.0989179	0.108143	0.290475	1.51e-06
SYTL1	0.195867	0.00135293	0.562653	1.58e-23
GCH1	0.108059	0.0791054	0.63189	6.07e-31
LINC01215	0.0319311	0.604824	0.555206	7.88e-23
GBP1	0.426871	3.68e-13	0.754624	4.85e-50
IL7R	0.124516	0.0428387	0.641672	3.8e-32
CDHR1	0.120679	0.0497151	0.205821	0.000749384
LAMA1	-0.249311	4.06e-05	-0.384811	8.81e-11
NOD2	0.247308	4.7e-05	0.745394	3.15e-48
ST8SIA1	0.267554	1.01e-05	0.788015	2.45e-57
LCK	0.544955	6.73e-22	0.932658	1.87e-118
RASGRP1	0.203799	0.000846855	0.581541	2.24e-25
TIGIT	0.499065	4.27e-18	0.903906	5.41e-99
MICB	0.237613	9.39e-05	0.792386	2.17e-58
PLAC8	0.216591	0.000383159	0.527849	2.06e-20
NRCAM	-0.207946	0.000658213	-0.170242	0.0054601
MAEL	-0.0908139	0.140373	-0.291182	1.42e-06
MST1L	-0.140346	0.0223018	-0.308851	2.9e-07
TRG-AS1	0.425061	4.74e-13	0.811654	2.37e-63
CCL4	0.500655	3.22e-18	0.798074	8.48e-60
TRBC1	0.599628	2.91e-27	0.926905	6.09e-114
HLA-DQB2	0.245822	5.23e-05	0.437722	7.88e-14
SAMD9	0.0550268	0.372279	0.592551	1.64e-26
SLAMF8	0.347852	5.93e-09	0.847634	2.36e-74
FAM26F	0.447282	1.93e-14	0.801069	1.47e-60
GBP4	0.510753	5.2e-19	0.708914	9.14e-42
CYP39A1	-0.259693	1.86e-05	-0.371864	4.09e-10
CXADR	-0.306016	3.77e-07	-0.271736	7.21e-06
IL21R	0.394246	2.75e-11	0.859228	1.6e-78
CST7	0.576847	6.62e-25	0.877295	7.99e-86
RHOH	0.446942	2.04e-14	0.878116	3.5e-86
IRF6	-0.0733906	0.233783	-0.356391	2.35e-09
UGT2B17	0.06526	0.289844	0.154489	0.0117977
PSTPIP2	0.174134	0.00446841	0.716489	5.05e-43
OLFM1	-0.181254	0.00306423	-0.193012	0.0015946
LAX1	0.191596	0.00172853	0.707332	1.65e-41
FHOD3	-0.175558	0.00414817	-0.279325	3.88e-06
CD70	0.330071	3.74e-08	0.347944	5.88e-09
LOC100505501	0.311391	2.29e-07	0.635429	2.25e-31
GZMH	0.60435	8.93e-28	0.784716	1.47e-56
CD2	0.606808	4.79e-28	0.917275	3.73e-107
LOC101928173	0.102548	0.0957421	0.655608	6.14e-34
CD7	0.365144	8.85e-10	0.581419	2.3e-25
FCRL3	0.470267	5.49e-16	0.841113	3.69e-72
ITGAL	0.579185	3.87e-25	0.908179	1.82e-101
TNFSF9	0.207111	0.000692709	0.212296	0.000502668
RRN3P2	0.180347	0.00321755	0.649851	3.47e-33
CCR5	0.556125	6.48e-23	0.918458	6.07e-108
VNN2	0.0273561	0.657546	0.335535	2.15e-08
NCF1	0.170713	0.00533052	0.686883	2.51e-38
OTOGL	-0.149681	0.0147333	-0.26137	1.63e-05
SERPINB9P1	0.145828	0.0175303	0.278298	4.22e-06
CLEC2D	0.137279	0.0254331	0.727887	5.38e-45
DUSP4	0.292543	1.26e-06	0.725876	1.22e-44
FLJ12120	0.30783	3.19e-07	0.686325	3.04e-38
KLRC3	0.224485	0.000229417	0.62998	1.03e-30
STEAP2	-0.17042	0.00541077	-0.366778	7.35e-10
TNFSF13B	0.211256	0.000536395	0.823752	9.07e-67
XAF1	0.248832	4.2e-05	0.593596	1.28e-26
CD96	0.35779	2.02e-09	0.871571	2.16e-83
BTN3A3	0.329625	3.91e-08	0.678482	4.29e-37
REEP1	-0.144322	0.0187431	-0.302143	5.36e-07
UBASH3A	0.546236	5.17e-22	0.870719	4.87e-83
KCNMB2	-0.106216	0.0843858	-0.264307	1.3e-05
CTSW	0.65821	2.77e-34	0.768464	6.47e-53
CCR2	0.259865	1.83e-05	0.745256	3.35e-48
KLHL6	0.0755686	0.220159	0.70755	1.52e-41
KBTBD8	0.0553032	0.369878	0.702245	1.08e-40
PVRIG	0.658877	2.26e-34	0.870375	6.74e-83
JAKMIP1	0.548059	3.54e-22	0.825004	3.88e-67
EMR1	0.230112	0.000157408	0.430232	2.3e-13
KCNJ10	0.23894	8.55e-05	0.336733	1.9e-08
TRAC	0.64393	1.98e-32	0.864369	1.72e-80
FYB	0.313683	1.84e-07	0.833291	1.18e-69
EPSTI1	0.363365	1.08e-09	0.670827	5.25e-36
CCR1	0.16677	0.00650715	0.724261	2.34e-44
TNFRSF9	0.547338	4.11e-22	0.834232	6e-70
LOC285957	0.190146	0.00187641	0.434158	1.32e-13
GBP2	0.365436	8.56e-10	0.749614	4.78e-49
CCDC109B	0.124711	0.0425123	0.677682	5.59e-37
PPL	-0.206724	0.000709312	-0.287983	1.87e-06
GSTO2	-0.185046	0.00249251	-0.342248	1.07e-08
IPCEF1	0.267972	9.74e-06	0.520718	8.09e-20
DUSP2	0.521811	6.57e-20	0.791378	3.82e-58
CD3D	0.63755	1.24e-31	0.909276	4.05e-102
PSTPIP1	0.510666	5.28e-19	0.88946	2.01e-91
IL2RG	0.609446	2.44e-28	0.785166	1.16e-56
LOC441081	0.142765	0.0200726	0.31307	1.95e-07
ITGB2-AS1	0.369536	5.36e-10	0.77493	2.5e-54
PTPN22	0.238409	8.88e-05	0.873524	3.3e-84
CD247	0.455899	5.25e-15	0.870416	6.48e-83
CD52	0.332333	2.98e-08	0.787422	3.39e-57
LILRB2	0.201716	0.000959336	0.801375	1.23e-60
BCL11B	0.406705	5.6e-12	0.849046	7.65e-75
NELL2	0.550014	2.36e-22	0.76616	2.01e-52
SHROOM2	-0.290543	1.5e-06	-0.454675	6.33e-15
SAMD9L	0.356954	2.21e-09	0.664995	3.36e-35
CD3E	0.694478	1.78e-39	0.708369	1.12e-41
SPI1	0.259515	1.88e-05	0.585957	7.95e-26
ADRB2	0.165628	0.00688894	0.214872	0.000427399
LOC441179	-0.215801	0.000402917	-0.290186	1.54e-06
RP11-320H14.1	-0.160463	0.00887628	-0.158251	0.00987319
PYHIN1	0.430745	2.14e-13	0.86743	1.05e-81
PCED1B	0.435943	1.02e-13	0.842409	1.38e-72
ADTRP	0.0938888	0.127373	0.350842	4.31e-09
LOC284837	0.0666389	0.279752	0.22827	0.000178245
BOK	-0.117982	0.0550815	-0.238204	9.01e-05
OASL	0.316411	1.42e-07	0.467571	8.46e-16
HENMT1	0.0671965	0.275739	0.627619	1.97e-30
BTN3A2	0.350313	4.56e-09	0.563996	1.18e-23
CORO1A	0.505251	1.41e-18	0.880404	3.39e-87
ISG20	0.193224	0.00157542	0.626138	2.96e-30
TRAF3IP3	0.336255	2e-08	0.88619	7.42e-90
MX2	0.135031	0.0279613	0.521023	7.63e-20
APOC1	0.261824	1.58e-05	0.412301	2.68e-12
RAC2	0.435296	1.12e-13	0.845002	1.86e-73
GPR27	-0.186103	0.00235145	-0.271601	7.29e-06
CYP46A1	-0.162788	0.00792619	-0.339666	1.41e-08
VEPH1	-0.0996776	0.105448	-0.338456	1.59e-08
GSTM3	-0.135754	0.027126	-0.255084	2.64e-05
SIDT1	0.207631	0.000671023	0.674046	1.85e-36
HOXA5	-0.207058	0.000694981	-0.383216	1.07e-10
KLRB1	0.0862611	0.161453	0.487364	3.25e-17
ABHD3	-0.000193384	0.9975	0.458737	3.39e-15
ZAP70	0.455555	5.54e-15	0.859832	9.47e-79
SIGLEC1	0.27787	4.37e-06	0.687561	1.99e-38
CAMK2N1	-0.190058	0.00188574	-0.442061	4.19e-14
CXCR6	0.45539	5.68e-15	0.863604	3.41e-80
C2	0.255197	2.62e-05	0.498662	4.58e-18
IL10RA	0.359147	1.73e-09	0.864206	1.99e-80
FAIM3	0.380834	1.42e-10	0.627648	1.96e-30
ATG16L1	0.0456821	0.458983	0.13493	0.02808
IRF7	0.187274	0.00220366	0.474725	2.67e-16
PRF1	0.658302	2.7e-34	0.709123	8.45e-42
CD5L	0.227843	0.000183436	0.347869	5.92e-09
STX11	0.14641	0.01708	0.747172	1.43e-48
PIK3R6	0.12488	0.0422295	0.404916	7.07e-12
RYR1	0.146258	0.0171965	0.335895	2.07e-08
ICOS	0.41673	1.48e-12	0.84946	5.49e-75
OAS2	0.307985	3.14e-07	0.548316	3.36e-22
ACSL5	0.267697	9.96e-06	0.715604	7.11e-43
TYMP	0.328947	4.18e-08	0.651421	2.17e-33
IL2RB	0.576026	7.99e-25	0.739686	3.81e-47
KLHDC7B	0.410013	3.63e-12	0.609459	2.43e-28
CD3G	0.544184	7.88e-22	0.846226	7.16e-74
PAK3	0.189781	0.00191536	0.333394	2.67e-08
NBL1	0.0677139	0.27205	0.223088	0.000251548
PDE3B	0.0920642	0.13497	0.23128	0.000145397
MYO1G	0.369165	5.59e-10	0.713899	1.37e-42
CEBPA	0.342061	1.09e-08	0.459421	3.05e-15
STAT1	0.406771	5.55e-12	0.708636	1.01e-41
CD300LF	0.255338	2.59e-05	0.721993	5.79e-44
SASH3	0.525881	3.01e-20	0.828868	2.71e-68
PYCARD	0.307454	3.3e-07	0.729085	3.29e-45
PRKCD	0.0862266	0.161621	0.342727	1.02e-08
HHIP	-0.0642138	0.297662	-0.162812	0.00791687
SH2D2A	0.590011	3.03e-26	0.810404	5.18e-63
ARHGAP9	0.500031	3.6e-18	0.892242	8.51e-93
MX1	0.242179	6.8e-05	0.375286	2.74e-10
ISG15	0.243806	6.05e-05	0.370119	5.01e-10
BANK1	0.0935378	0.128808	0.232679	0.000132141
LPAR5	0.20611	0.000736312	0.680471	2.21e-37
CXorf65	0.367009	7.16e-10	0.683922	6.9e-38
P2RY10	0.444616	2.88e-14	0.846822	4.48e-74
KIAA1551	0.113418	0.0652503	0.613938	7.64e-29
STK17B	0.0405604	0.510907	0.741074	2.09e-47
BTLA	0.20073	0.00101729	0.711095	4.01e-42
NLRC5	0.514823	2.45e-19	0.793103	1.45e-58
TMEM154	0.0873271	0.156316	0.59227	1.76e-26
KLRC4	0.267468	1.01e-05	0.596199	6.76e-27
TBC1D10C	0.573287	1.49e-24	0.819543	1.5e-65
GNAL	-0.258074	2.1e-05	-0.371454	4.29e-10
SAMD3	0.285953	2.22e-06	0.773255	5.87e-54
HHIP-AS1	-0.0555431	0.367802	-0.182358	0.0028866
IRF1	0.555164	7.95e-23	0.827571	6.66e-68
CD274	0.281701	3.18e-06	0.429668	2.49e-13
KIAA1324L	-0.171318	0.00516792	-0.173585	0.00459779
SIGLEC10	0.322435	7.96e-08	0.695344	1.31e-39
PLEK	0.369496	5.38e-10	0.753107	9.75e-50
DOCK10	0.187932	0.00212443	0.66975	7.42e-36
TDRD6	-0.193246	0.00157339	-0.371467	4.29e-10
LCP2	0.25191	3.35e-05	0.894427	6.69e-94
HCP5	0.497172	5.96e-18	0.578406	4.63e-25
DENND1C	0.441663	4.44e-14	0.459887	2.84e-15
FCRLB	-0.0631952	0.305408	-0.187697	0.00215241
AF007147	0.308204	3.08e-07	0.676094	9.44e-37
SCD5	-0.211867	0.00051632	-0.310542	2.48e-07
GDF15	-0.182611	0.0028473	-0.402468	9.7e-12
FASLG	0.618287	2.44e-29	0.800541	2.01e-60
UCP2	0.444565	2.9e-14	0.634748	2.73e-31
PLEKHO1	0.274799	5.63e-06	0.75625	2.28e-50
MEGF6	0.0690327	0.262801	0.209128	0.000612046
PATL2	0.493637	1.1e-17	0.737739	8.79e-47
LSP1	0.371423	4.31e-10	0.702963	8.34e-41
NCKAP1L	0.294341	1.08e-06	0.867676	8.4e-82
LAT	0.447677	1.82e-14	0.651192	2.32e-33
PTPRCAP	0.658654	2.42e-34	0.796289	2.37e-59
RP11-732A19.1	0.172333	0.00490517	0.579646	3.48e-25
SECTM1	0.465003	1.27e-15	0.628229	1.67e-30
RASSF5	0.470744	5.09e-16	0.691679	4.76e-39
PRKCQ	0.289326	1.66e-06	0.32395	6.86e-08
MAP4K1	0.623609	5.87e-30	0.773927	4.17e-54
SKAP1	0.160883	0.00869742	0.326988	5.08e-08
CA11	-0.0580282	0.346726	-0.218887	0.000330662
CCRL2	0.0294894	0.63273	0.524233	4.13e-20
LAPTM4B	-0.373265	3.48e-10	-0.352806	3.48e-09
UTS2	0.363857	1.02e-09	0.436767	9.04e-14

## Sheet:  Top 20 clusters
GO	Category	Description	Count	%	Log10(P)	Log10(q)
GO:0046649	GO Biological Processes	lymphocyte activation	63	23.6	-37.03	-32.71
GO:0002250	GO Biological Processes	adaptive immune response	50	18.73	-26.07	-22.23
GO:0019221	GO Biological Processes	cytokine-mediated signaling pathway	50	18.73	-22.92	-19.6
GO:0050851	GO Biological Processes	antigen receptor-mediated signaling pathway	32	11.99	-20.75	-17.59
R-HSA-202433	Reactome Gene Sets	Generation of second messenger molecules	14	5.24	-18.71	-15.77
GO:0001816	GO Biological Processes	cytokine production	41	15.36	-15.78	-12.95
R-HSA-1280218	Reactome Gene Sets	Adaptive Immune System	39	14.61	-14.92	-12.11
R-HSA-913531	Reactome Gene Sets	Interferon Signaling	21	7.87	-14.1	-11.35
GO:0002683	GO Biological Processes	negative regulation of immune system process	29	10.86	-13.27	-10.59
GO:0009617	GO Biological Processes	response to bacterium	35	13.11	-13	-10.36
GO:0006968	GO Biological Processes	cellular defense response	12	4.49	-12.33	-9.76
GO:0046631	GO Biological Processes	alpha-beta T cell activation	16	5.99	-11.5	-9.03
R-HSA-380108	Reactome Gene Sets	Chemokine receptors bind chemokines	11	4.12	-11.41	-8.95
GO:0045088	GO Biological Processes	regulation of innate immune response	25	9.36	-10.28	-7.9
GO:2000107	GO Biological Processes	negative regulation of leukocyte apoptotic process	10	3.75	-10.08	-7.71
hsa04650	KEGG Pathway	Natural killer cell mediated cytotoxicity	13	4.87	-8.52	-6.22
GO:0019932	GO Biological Processes	second-messenger-mediated signaling	22	8.24	-8.33	-6.04
GO:0045058	GO Biological Processes	T cell selection	8	3	-7.36	-5.14
GO:0002697	GO Biological Processes	regulation of immune effector process	21	7.87	-7.26	-5.06
GO:0072643	GO Biological Processes	interferon-gamma secretion	6	2.25	-6.96	-4.79
