# Supplementary material for: Identification of biomarkers related to CD8+ T cell infiltration with gene co-expression network in clear cell renal cell carcinoma
Source: Aging (Albany NY). 2020 Feb 20;12(4):3694–712. doi: 10.18632/aging.102841 (PMC7066925; doi:10.18632/aging.102841)
Supplement: Supplementary Table 5 [file aging-12-102841-s001..xlsx]

## Sheet: gsea_report_for_High
NAME	GS<br> follow link to MSigDB	GS DETAILS	SIZE	ES	NES	NOM p-val	FDR q-val	FWER p-val	RANK AT MAX	LEADING EDGE
KEGG_ANTIGEN_PROCESSING_AND_PRESENTATION	KEGG_ANTIGEN_PROCESSING_AND_PRESENTATION	Details ...	80	0.797568	2.65044	0	0	0	1303	tags=55%, list=7%, signal=59%
KEGG_CELL_ADHESION_MOLECULES_CAMS	KEGG_CELL_ADHESION_MOLECULES_CAMS	Details ...	131	0.675606	2.5751	0	0	0	827	tags=32%, list=4%, signal=33%
KEGG_AUTOIMMUNE_THYROID_DISEASE	KEGG_AUTOIMMUNE_THYROID_DISEASE	Details ...	50	0.884591	2.53608	0	0	0	882	tags=56%, list=4%, signal=58%
KEGG_VIRAL_MYOCARDITIS	KEGG_VIRAL_MYOCARDITIS	Details ...	68	0.751355	2.49266	0	0	0	757	tags=43%, list=4%, signal=44%
KEGG_NATURAL_KILLER_CELL_MEDIATED_CYTOTOXICITY	KEGG_NATURAL_KILLER_CELL_MEDIATED_CYTOTOXICITY	Details ...	131	0.661875	2.48435	0	0	0	1496	tags=39%, list=8%, signal=42%
KEGG_CYTOKINE_CYTOKINE_RECEPTOR_INTERACTION	KEGG_CYTOKINE_CYTOKINE_RECEPTOR_INTERACTION	Details ...	262	0.598007	2.44798	0	0	0	1565	tags=31%, list=8%, signal=33%
KEGG_INTESTINAL_IMMUNE_NETWORK_FOR_IGA_PRODUCTION	KEGG_INTESTINAL_IMMUNE_NETWORK_FOR_IGA_PRODUCTION	Details ...	45	0.849718	2.43989	0	0	0	1522	tags=67%, list=8%, signal=72%
KEGG_TYPE_I_DIABETES_MELLITUS	KEGG_TYPE_I_DIABETES_MELLITUS	Details ...	41	0.900023	2.39935	0	0	0	882	tags=68%, list=4%, signal=71%
KEGG_HEMATOPOIETIC_CELL_LINEAGE	KEGG_HEMATOPOIETIC_CELL_LINEAGE	Details ...	85	0.660718	2.28473	0	0.000149196	0.002	912	tags=29%, list=5%, signal=31%
KEGG_GRAFT_VERSUS_HOST_DISEASE	KEGG_GRAFT_VERSUS_HOST_DISEASE	Details ...	37	0.903712	2.26196	0	0.000134276	0.002	882	tags=76%, list=4%, signal=79%
KEGG_ALLOGRAFT_REJECTION	KEGG_ALLOGRAFT_REJECTION	Details ...	35	0.921506	2.26037	0	0.00012207	0.002	882	tags=83%, list=4%, signal=87%
KEGG_PRIMARY_IMMUNODEFICIENCY	KEGG_PRIMARY_IMMUNODEFICIENCY	Details ...	35	0.833423	2.25488	0	0.000111897	0.002	1840	tags=77%, list=9%, signal=85%
KEGG_ASTHMA	KEGG_ASTHMA	Details ...	28	0.845125	2.24532	0	0.00010329	0.002	757	tags=54%, list=4%, signal=56%
KEGG_LEISHMANIA_INFECTION	KEGG_LEISHMANIA_INFECTION	Details ...	69	0.725213	2.22362	0	0.000183511	0.004	982	tags=42%, list=5%, signal=44%
KEGG_CYTOSOLIC_DNA_SENSING_PATHWAY	KEGG_CYTOSOLIC_DNA_SENSING_PATHWAY	Details ...	55	0.612284	2.20094	0	0.000171277	0.004	958	tags=24%, list=5%, signal=25%
KEGG_T_CELL_RECEPTOR_SIGNALING_PATHWAY	KEGG_T_CELL_RECEPTOR_SIGNALING_PATHWAY	Details ...	108	0.591962	2.09793	0.0019685	0.00103013	0.02	1496	tags=34%, list=8%, signal=37%
KEGG_CHEMOKINE_SIGNALING_PATHWAY	KEGG_CHEMOKINE_SIGNALING_PATHWAY	Details ...	186	0.546326	2.07859	0.00204082	0.0011962	0.024	1496	tags=33%, list=8%, signal=35%
KEGG_SYSTEMIC_LUPUS_ERYTHEMATOSUS	KEGG_SYSTEMIC_LUPUS_ERYTHEMATOSUS	Details ...	133	0.695555	2.02861	0	0.00301495	0.054	1034	tags=23%, list=5%, signal=24%
KEGG_PROTEASOME	KEGG_PROTEASOME	Details ...	44	0.692859	1.9022	0.010101	0.0116813	0.145	1813	tags=45%, list=9%, signal=50%
KEGG_TOLL_LIKE_RECEPTOR_SIGNALING_PATHWAY	KEGG_TOLL_LIKE_RECEPTOR_SIGNALING_PATHWAY	Details ...	102	0.483902	1.7817	0.0152091	0.0340656	0.371	1435	tags=26%, list=7%, signal=28%
KEGG_B_CELL_RECEPTOR_SIGNALING_PATHWAY	KEGG_B_CELL_RECEPTOR_SIGNALING_PATHWAY		75	0.499499	1.77769	0.00585938	0.0336606	0.375	1926	tags=37%, list=10%, signal=41%
KEGG_FC_GAMMA_R_MEDIATED_PHAGOCYTOSIS	KEGG_FC_GAMMA_R_MEDIATED_PHAGOCYTOSIS		95	0.458707	1.75811	0.0199601	0.0371379	0.411	1441	tags=32%, list=7%, signal=34%
KEGG_JAK_STAT_SIGNALING_PATHWAY	KEGG_JAK_STAT_SIGNALING_PATHWAY		155	0.434917	1.71715	0.00788955	0.0490489	0.506	1597	tags=23%, list=8%, signal=24%
KEGG_LEUKOCYTE_TRANSENDOTHELIAL_MIGRATION	KEGG_LEUKOCYTE_TRANSENDOTHELIAL_MIGRATION		116	0.423389	1.65964	0.0299401	0.0701083	0.623	1926	tags=27%, list=10%, signal=29%
KEGG_PRION_DISEASES	KEGG_PRION_DISEASES		35	0.522901	1.6132	0.0295858	0.0917615	0.725	1303	tags=20%, list=7%, signal=21%
KEGG_NOD_LIKE_RECEPTOR_SIGNALING_PATHWAY	KEGG_NOD_LIKE_RECEPTOR_SIGNALING_PATHWAY		62	0.41927	1.48399	0.0735849	0.182078	0.918	3438	tags=37%, list=18%, signal=45%
KEGG_FC_EPSILON_RI_SIGNALING_PATHWAY	KEGG_FC_EPSILON_RI_SIGNALING_PATHWAY		79	0.379937	1.48291	0.0539033	0.176481	0.919	1496	tags=23%, list=8%, signal=25%
KEGG_PATHOGENIC_ESCHERICHIA_COLI_INFECTION	KEGG_PATHOGENIC_ESCHERICHIA_COLI_INFECTION		55	0.419639	1.40414	0.123967	0.249153	0.966	994	tags=20%, list=5%, signal=21%
KEGG_VEGF_SIGNALING_PATHWAY	KEGG_VEGF_SIGNALING_PATHWAY		76	0.336808	1.3721	0.058	0.278429	0.978	2254	tags=24%, list=11%, signal=27%
KEGG_ACUTE_MYELOID_LEUKEMIA	KEGG_ACUTE_MYELOID_LEUKEMIA		57	0.359921	1.2953	0.184466	0.370613	0.991	1496	tags=26%, list=8%, signal=28%
KEGG_ENDOCYTOSIS	KEGG_ENDOCYTOSIS		180	0.285272	1.27292	0.139721	0.390882	0.994	2239	tags=21%, list=11%, signal=24%
KEGG_REGULATION_OF_ACTIN_CYTOSKELETON	KEGG_REGULATION_OF_ACTIN_CYTOSKELETON		212	0.290643	1.24378	0.175542	0.424133	0.997	1496	tags=16%, list=8%, signal=17%
KEGG_GLYCOSAMINOGLYCAN_BIOSYNTHESIS_CHONDROITIN_SULFATE	KEGG_GLYCOSAMINOGLYCAN_BIOSYNTHESIS_CHONDROITIN_SULFATE		22	0.403865	1.17223	0.284	0.528112	0.998	2091	tags=32%, list=11%, signal=36%
KEGG_RIG_I_LIKE_RECEPTOR_SIGNALING_PATHWAY	KEGG_RIG_I_LIKE_RECEPTOR_SIGNALING_PATHWAY		71	0.313783	1.15607	0.279762	0.541262	0.999	1598	tags=17%, list=8%, signal=18%
KEGG_DNA_REPLICATION	KEGG_DNA_REPLICATION		36	0.415175	1.15528	0.348337	0.527003	0.999	3356	tags=39%, list=17%, signal=47%
KEGG_BASE_EXCISION_REPAIR	KEGG_BASE_EXCISION_REPAIR		33	0.373802	1.14626	0.322515	0.527917	0.999	4419	tags=52%, list=22%, signal=66%
KEGG_AMYOTROPHIC_LATERAL_SCLEROSIS_ALS	KEGG_AMYOTROPHIC_LATERAL_SCLEROSIS_ALS		52	0.278906	1.13307	0.252941	0.536663	0.999	2804	tags=23%, list=14%, signal=27%
KEGG_APOPTOSIS	KEGG_APOPTOSIS		87	0.290924	1.09739	0.33996	0.582248	1	3207	tags=30%, list=16%, signal=36%
KEGG_ALPHA_LINOLENIC_ACID_METABOLISM	KEGG_ALPHA_LINOLENIC_ACID_METABOLISM		19	0.414273	1.08901	0.356604	0.580889	1	2734	tags=37%, list=14%, signal=43%
KEGG_SNARE_INTERACTIONS_IN_VESICULAR_TRANSPORT	KEGG_SNARE_INTERACTIONS_IN_VESICULAR_TRANSPORT		38	0.294345	1.0661	0.369048	0.605991	1	935	tags=16%, list=5%, signal=17%
KEGG_LYSOSOME	KEGG_LYSOSOME		121	0.305405	1.06236	0.400794	0.59822	1	2912	tags=28%, list=15%, signal=33%
KEGG_ABC_TRANSPORTERS	KEGG_ABC_TRANSPORTERS		44	0.298845	1.05459	0.388781	0.597217	1	1505	tags=14%, list=8%, signal=15%
KEGG_NON_SMALL_CELL_LUNG_CANCER	KEGG_NON_SMALL_CELL_LUNG_CANCER		54	0.287615	1.05335	0.400778	0.585315	1	1617	tags=24%, list=8%, signal=26%
KEGG_GLYCOSPHINGOLIPID_BIOSYNTHESIS_GANGLIO_SERIES	KEGG_GLYCOSPHINGOLIPID_BIOSYNTHESIS_GANGLIO_SERIES		15	0.361904	1.03513	0.391481	0.601529	1	1351	tags=20%, list=7%, signal=21%
KEGG_COMPLEMENT_AND_COAGULATION_CASCADES	KEGG_COMPLEMENT_AND_COAGULATION_CASCADES		69	0.410335	1.02084	0.46063	0.61298	1	1796	tags=17%, list=9%, signal=19%
KEGG_AMINO_SUGAR_AND_NUCLEOTIDE_SUGAR_METABOLISM	KEGG_AMINO_SUGAR_AND_NUCLEOTIDE_SUGAR_METABOLISM		43	0.302747	1.0028	0.424242	0.628759	1	1705	tags=21%, list=9%, signal=23%
KEGG_ARACHIDONIC_ACID_METABOLISM	KEGG_ARACHIDONIC_ACID_METABOLISM		57	0.272204	0.984282	0.482625	0.648437	1	2734	tags=19%, list=14%, signal=22%
KEGG_GLYCOSPHINGOLIPID_BIOSYNTHESIS_LACTO_AND_NEOLACTO_SERIES	KEGG_GLYCOSPHINGOLIPID_BIOSYNTHESIS_LACTO_AND_NEOLACTO_SERIES		26	0.273359	0.981116	0.486056	0.64075	1	265	tags=8%, list=1%, signal=8%
KEGG_PYRIMIDINE_METABOLISM	KEGG_PYRIMIDINE_METABOLISM		98	0.237645	0.947882	0.486708	0.682548	1	2716	tags=23%, list=14%, signal=27%
KEGG_MAPK_SIGNALING_PATHWAY	KEGG_MAPK_SIGNALING_PATHWAY		267	0.206136	0.925959	0.573146	0.704906	1	1573	tags=12%, list=8%, signal=12%
KEGG_HOMOLOGOUS_RECOMBINATION	KEGG_HOMOLOGOUS_RECOMBINATION		28	0.316291	0.88975	0.583166	0.751468	1	3916	tags=32%, list=20%, signal=40%
KEGG_GLUTATHIONE_METABOLISM	KEGG_GLUTATHIONE_METABOLISM		47	0.241168	0.852008	0.659044	0.802701	1	3913	tags=34%, list=20%, signal=42%
KEGG_RIBOFLAVIN_METABOLISM	KEGG_RIBOFLAVIN_METABOLISM		16	0.283371	0.849893	0.675403	0.791151	1	1785	tags=19%, list=9%, signal=21%
KEGG_FRUCTOSE_AND_MANNOSE_METABOLISM	KEGG_FRUCTOSE_AND_MANNOSE_METABOLISM		33	0.256512	0.84186	0.637624	0.790605	1	1785	tags=15%, list=9%, signal=17%
KEGG_P53_SIGNALING_PATHWAY	KEGG_P53_SIGNALING_PATHWAY		68	0.230178	0.830973	0.669371	0.793458	1	2804	tags=28%, list=14%, signal=32%
KEGG_NEUROACTIVE_LIGAND_RECEPTOR_INTERACTION	KEGG_NEUROACTIVE_LIGAND_RECEPTOR_INTERACTION		271	0.209617	0.822734	0.784351	0.791813	1	2329	tags=11%, list=12%, signal=12%
KEGG_RIBOSOME	KEGG_RIBOSOME		86	0.371395	0.789629	0.673347	0.831129	1	6076	tags=55%, list=31%, signal=79%
KEGG_GALACTOSE_METABOLISM	KEGG_GALACTOSE_METABOLISM		26	0.230569	0.732535	0.814371	0.90617	1	1448	tags=15%, list=7%, signal=17%
KEGG_OLFACTORY_TRANSDUCTION	KEGG_OLFACTORY_TRANSDUCTION		377	0.24414	0.730361	0.763209	0.893666	1	6411	tags=45%, list=33%, signal=65%
KEGG_CELL_CYCLE	KEGG_CELL_CYCLE		124	0.207276	0.724407	0.745935	0.887168	1	3140	tags=29%, list=16%, signal=34%
KEGG_MATURITY_ONSET_DIABETES_OF_THE_YOUNG	KEGG_MATURITY_ONSET_DIABETES_OF_THE_YOUNG		25	0.225874	0.714442	0.878	0.886386	1	3882	tags=24%, list=20%, signal=30%
KEGG_LINOLEIC_ACID_METABOLISM	KEGG_LINOLEIC_ACID_METABOLISM		29	0.228064	0.643686	0.918288	0.954324	1	2734	tags=17%, list=14%, signal=20%
KEGG_OTHER_GLYCAN_DEGRADATION	KEGG_OTHER_GLYCAN_DEGRADATION		16	0.224585	0.5976	0.883365	0.980743	1	422	tags=6%, list=2%, signal=6%
KEGG_PARKINSONS_DISEASE	KEGG_PARKINSONS_DISEASE		126	0.205201	0.578402	0.819473	0.980188	1	3134	tags=27%, list=16%, signal=32%
KEGG_PORPHYRIN_AND_CHLOROPHYLL_METABOLISM	KEGG_PORPHYRIN_AND_CHLOROPHYLL_METABOLISM		41	0.170075	0.512953	0.998051	0.999934	1	2964	tags=20%, list=15%, signal=23%
KEGG_GLYCOSAMINOGLYCAN_BIOSYNTHESIS_KERATAN_SULFATE	KEGG_GLYCOSAMINOGLYCAN_BIOSYNTHESIS_KERATAN_SULFATE		15	0.183342	0.512166	0.985477	0.985121	1	16045	tags=100%, list=82%, signal=545%
KEGG_DRUG_METABOLISM_OTHER_ENZYMES	KEGG_DRUG_METABOLISM_OTHER_ENZYMES		51	0.154662	0.449137	1	0.987637	1	1691	tags=8%, list=9%, signal=9%

## Sheet: gsea_report_for_Low
Supplementary Table 5. The results of gene set enrichment analysis.
NAME	GS<br> follow link to MSigDB	GS DETAILS	SIZE	ES	NES	NOM p-val	FDR q-val	FWER p-val	RANK AT MAX	LEADING EDGE
KEGG_GLYCOSYLPHOSPHATIDYLINOSITOL_GPI_ANCHOR_BIOSYNTHESIS	KEGG_GLYCOSYLPHOSPHATIDYLINOSITOL_GPI_ANCHOR_BIOSYNTHESIS	Details ...	25	-0.598847	-1.83025	0.00804829	0.647552	0.267	5586	tags=64%, list=28%, signal=89%
KEGG_LYSINE_DEGRADATION	KEGG_LYSINE_DEGRADATION	Details ...	44	-0.511947	-1.71858	0.0157791	0.855201	0.499	5522	tags=55%, list=28%, signal=76%
KEGG_PROPANOATE_METABOLISM	KEGG_PROPANOATE_METABOLISM	Details ...	31	-0.601431	-1.63334	0.0606654	1	0.668	6203	tags=74%, list=32%, signal=108%
KEGG_UBIQUITIN_MEDIATED_PROTEOLYSIS	KEGG_UBIQUITIN_MEDIATED_PROTEOLYSIS	Details ...	133	-0.416699	-1.59902	0.0418327	0.983707	0.724	5138	tags=49%, list=26%, signal=66%
KEGG_ENDOMETRIAL_CANCER	KEGG_ENDOMETRIAL_CANCER	Details ...	52	-0.444613	-1.57237	0.0499002	0.931739	0.777	5277	tags=63%, list=27%, signal=87%
KEGG_VALINE_LEUCINE_AND_ISOLEUCINE_DEGRADATION	KEGG_VALINE_LEUCINE_AND_ISOLEUCINE_DEGRADATION	Details ...	43	-0.592466	-1.56174	0.0919765	0.832004	0.799	2832	tags=51%, list=14%, signal=60%
KEGG_BUTANOATE_METABOLISM	KEGG_BUTANOATE_METABOLISM	Details ...	34	-0.537736	-1.55517	0.0666667	0.740789	0.812	5621	tags=59%, list=29%, signal=82%
KEGG_TIGHT_JUNCTION	KEGG_TIGHT_JUNCTION	Details ...	132	-0.376505	-1.55454	0.0306748	0.650718	0.812	4712	tags=39%, list=24%, signal=50%
KEGG_INSULIN_SIGNALING_PATHWAY	KEGG_INSULIN_SIGNALING_PATHWAY	Details ...	137	-0.344745	-1.54299	0.015625	0.619713	0.827	4641	tags=36%, list=24%, signal=47%
KEGG_WNT_SIGNALING_PATHWAY	KEGG_WNT_SIGNALING_PATHWAY	Details ...	150	-0.367454	-1.51614	0.0386965	0.650274	0.861	5195	tags=40%, list=26%, signal=54%
KEGG_SELENOAMINO_ACID_METABOLISM	KEGG_SELENOAMINO_ACID_METABOLISM	Details ...	26	-0.465618	-1.49803	0.0715706	0.649911	0.879	6205	tags=54%, list=32%, signal=79%
KEGG_PROSTATE_CANCER	KEGG_PROSTATE_CANCER	Details ...	89	-0.382712	-1.49033	0.0657371	0.620499	0.885	5428	tags=48%, list=28%, signal=66%
KEGG_ADHERENS_JUNCTION	KEGG_ADHERENS_JUNCTION	Details ...	73	-0.418654	-1.48766	0.0856031	0.580593	0.892	4616	tags=53%, list=23%, signal=70%
KEGG_VASOPRESSIN_REGULATED_WATER_REABSORPTION	KEGG_VASOPRESSIN_REGULATED_WATER_REABSORPTION	Details ...	43	-0.425364	-1.48357	0.0734694	0.548211	0.896	3774	tags=44%, list=19%, signal=55%
KEGG_TGF_BETA_SIGNALING_PATHWAY	KEGG_TGF_BETA_SIGNALING_PATHWAY	Details ...	85	-0.409671	-1.47414	0.0817121	0.537032	0.907	6578	tags=52%, list=33%, signal=77%
KEGG_TERPENOID_BACKBONE_BIOSYNTHESIS	KEGG_TERPENOID_BACKBONE_BIOSYNTHESIS	Details ...	15	-0.527708	-1.47254	0.0897436	0.508126	0.909	1503	tags=33%, list=8%, signal=36%
KEGG_CITRATE_CYCLE_TCA_CYCLE	KEGG_CITRATE_CYCLE_TCA_CYCLE	Details ...	30	-0.605597	-1.46841	0.150685	0.487526	0.913	6158	tags=77%, list=31%, signal=112%
KEGG_MTOR_SIGNALING_PATHWAY	KEGG_MTOR_SIGNALING_PATHWAY	Details ...	52	-0.372565	-1.42633	0.0622407	0.56733	0.945	3830	tags=40%, list=19%, signal=50%
KEGG_INOSITOL_PHOSPHATE_METABOLISM	KEGG_INOSITOL_PHOSPHATE_METABOLISM	Details ...	54	-0.41333	-1.42553	0.10099	0.53974	0.945	3124	tags=35%, list=16%, signal=42%
KEGG_PYRUVATE_METABOLISM	KEGG_PYRUVATE_METABOLISM	Details ...	40	-0.464387	-1.40195	0.160714	0.574246	0.955	2798	tags=30%, list=14%, signal=35%
KEGG_PROXIMAL_TUBULE_BICARBONATE_RECLAMATION	KEGG_PROXIMAL_TUBULE_BICARBONATE_RECLAMATION		23	-0.481455	-1.37788	0.112676	0.61287	0.968	8613	tags=83%, list=44%, signal=147%
KEGG_LONG_TERM_POTENTIATION	KEGG_LONG_TERM_POTENTIATION		70	-0.347154	-1.36823	0.0920245	0.61343	0.97	5061	tags=41%, list=26%, signal=56%
KEGG_RNA_DEGRADATION	KEGG_RNA_DEGRADATION		56	-0.378757	-1.33855	0.170874	0.666872	0.978	3965	tags=36%, list=20%, signal=45%
KEGG_CYSTEINE_AND_METHIONINE_METABOLISM	KEGG_CYSTEINE_AND_METHIONINE_METABOLISM		34	-0.408862	-1.33552	0.111969	0.646744	0.978	3475	tags=35%, list=18%, signal=43%
KEGG_ADIPOCYTOKINE_SIGNALING_PATHWAY	KEGG_ADIPOCYTOKINE_SIGNALING_PATHWAY		67	-0.339434	-1.32634	0.125253	0.64441	0.979	1966	tags=24%, list=10%, signal=26%
KEGG_ERBB_SIGNALING_PATHWAY	KEGG_ERBB_SIGNALING_PATHWAY		87	-0.330056	-1.32201	0.137931	0.630398	0.98	5549	tags=48%, list=28%, signal=67%
KEGG_ARRHYTHMOGENIC_RIGHT_VENTRICULAR_CARDIOMYOPATHY_ARVC	KEGG_ARRHYTHMOGENIC_RIGHT_VENTRICULAR_CARDIOMYOPATHY_ARVC		74	-0.353426	-1.31609	0.125245	0.622245	0.982	5639	tags=39%, list=29%, signal=55%
KEGG_TYPE_II_DIABETES_MELLITUS	KEGG_TYPE_II_DIABETES_MELLITUS		47	-0.348407	-1.30743	0.0981595	0.621802	0.983	3342	tags=32%, list=17%, signal=38%
KEGG_THYROID_CANCER	KEGG_THYROID_CANCER		29	-0.379905	-1.2771	0.179487	0.676451	0.987	5055	tags=48%, list=26%, signal=65%
KEGG_COLORECTAL_CANCER	KEGG_COLORECTAL_CANCER		62	-0.35621	-1.2769	0.204499	0.654423	0.987	5277	tags=55%, list=27%, signal=75%
KEGG_OOCYTE_MEIOSIS	KEGG_OOCYTE_MEIOSIS		112	-0.32048	-1.26554	0.176806	0.66318	0.99	4908	tags=35%, list=25%, signal=46%
KEGG_STEROID_BIOSYNTHESIS	KEGG_STEROID_BIOSYNTHESIS		17	-0.478342	-1.24551	0.230303	0.693549	0.99	3486	tags=29%, list=18%, signal=36%
KEGG_RENAL_CELL_CARCINOMA	KEGG_RENAL_CELL_CARCINOMA		70	-0.334467	-1.2441	0.226908	0.676053	0.99	5335	tags=47%, list=27%, signal=64%
KEGG_GAP_JUNCTION	KEGG_GAP_JUNCTION		89	-0.309176	-1.23355	0.194059	0.682609	0.991	5377	tags=37%, list=27%, signal=51%
KEGG_ONE_CARBON_POOL_BY_FOLATE	KEGG_ONE_CARBON_POOL_BY_FOLATE		17	-0.418098	-1.22412	0.250996	0.685233	0.993	4589	tags=41%, list=23%, signal=54%
KEGG_ALDOSTERONE_REGULATED_SODIUM_REABSORPTION	KEGG_ALDOSTERONE_REGULATED_SODIUM_REABSORPTION		42	-0.339655	-1.21262	0.195609	0.69348	0.994	2769	tags=29%, list=14%, signal=33%
KEGG_PROGESTERONE_MEDIATED_OOCYTE_MATURATION	KEGG_PROGESTERONE_MEDIATED_OOCYTE_MATURATION		85	-0.307824	-1.21107	0.21499	0.678583	0.994	4763	tags=38%, list=24%, signal=49%
KEGG_MELANOGENESIS	KEGG_MELANOGENESIS		101	-0.286856	-1.19956	0.188377	0.690197	0.995	5195	tags=35%, list=26%, signal=47%
KEGG_BASAL_TRANSCRIPTION_FACTORS	KEGG_BASAL_TRANSCRIPTION_FACTORS		35	-0.374475	-1.19836	0.262846	0.674683	0.995	5881	tags=49%, list=30%, signal=69%
KEGG_REGULATION_OF_AUTOPHAGY	KEGG_REGULATION_OF_AUTOPHAGY		35	-0.354077	-1.18968	0.243129	0.67841	0.997	2431	tags=23%, list=12%, signal=26%
KEGG_O_GLYCAN_BIOSYNTHESIS	KEGG_O_GLYCAN_BIOSYNTHESIS		30	-0.355393	-1.18945	0.239919	0.662431	0.997	7061	tags=50%, list=36%, signal=78%
KEGG_AMINOACYL_TRNA_BIOSYNTHESIS	KEGG_AMINOACYL_TRNA_BIOSYNTHESIS		41	-0.375266	-1.14934	0.330629	0.74208	0.998	3090	tags=34%, list=16%, signal=40%
KEGG_GLYOXYLATE_AND_DICARBOXYLATE_METABOLISM	KEGG_GLYOXYLATE_AND_DICARBOXYLATE_METABOLISM		16	-0.444441	-1.14869	0.323529	0.726498	0.998	6158	tags=50%, list=31%, signal=73%
KEGG_MELANOMA	KEGG_MELANOMA		71	-0.288749	-1.14629	0.238289	0.715621	0.998	4918	tags=37%, list=25%, signal=49%
KEGG_SPHINGOLIPID_METABOLISM	KEGG_SPHINGOLIPID_METABOLISM		39	-0.31814	-1.13807	0.292	0.71812	0.999	4795	tags=38%, list=24%, signal=51%
KEGG_GNRH_SIGNALING_PATHWAY	KEGG_GNRH_SIGNALING_PATHWAY		101	-0.267422	-1.13147	0.239351	0.716948	0.999	4908	tags=31%, list=25%, signal=41%
KEGG_FATTY_ACID_METABOLISM	KEGG_FATTY_ACID_METABOLISM		42	-0.409889	-1.12892	0.333333	0.707189	0.999	5522	tags=43%, list=28%, signal=59%
KEGG_NUCLEOTIDE_EXCISION_REPAIR	KEGG_NUCLEOTIDE_EXCISION_REPAIR		44	-0.348668	-1.12759	0.353783	0.69522	0.999	3437	tags=27%, list=17%, signal=33%
KEGG_GLYCINE_SERINE_AND_THREONINE_METABOLISM	KEGG_GLYCINE_SERINE_AND_THREONINE_METABOLISM		31	-0.403741	-1.11678	0.354125	0.705206	0.999	6888	tags=45%, list=35%, signal=69%
KEGG_PHOSPHATIDYLINOSITOL_SIGNALING_SYSTEM	KEGG_PHOSPHATIDYLINOSITOL_SIGNALING_SYSTEM		76	-0.306514	-1.11481	0.324903	0.695152	0.999	4841	tags=42%, list=25%, signal=56%
KEGG_NITROGEN_METABOLISM	KEGG_NITROGEN_METABOLISM		23	-0.387795	-1.09011	0.352321	0.735995	1	5743	tags=43%, list=29%, signal=61%
KEGG_GLYCEROPHOSPHOLIPID_METABOLISM	KEGG_GLYCEROPHOSPHOLIPID_METABOLISM		77	-0.262634	-1.08575	0.312749	0.730485	1	4194	tags=29%, list=21%, signal=36%
KEGG_PATHWAYS_IN_CANCER	KEGG_PATHWAYS_IN_CANCER		325	-0.240495	-1.07136	0.348606	0.747664	1	5195	tags=36%, list=26%, signal=48%
KEGG_CHRONIC_MYELOID_LEUKEMIA	KEGG_CHRONIC_MYELOID_LEUKEMIA		73	-0.29351	-1.06006	0.37751	0.758733	1	5277	tags=44%, list=27%, signal=60%
KEGG_GLIOMA	KEGG_GLIOMA		65	-0.272377	-1.05767	0.38843	0.749942	1	4908	tags=38%, list=25%, signal=51%
KEGG_VIBRIO_CHOLERAE_INFECTION	KEGG_VIBRIO_CHOLERAE_INFECTION		54	-0.314648	-1.0505	0.379921	0.751869	1	5572	tags=43%, list=28%, signal=59%
KEGG_LONG_TERM_DEPRESSION	KEGG_LONG_TERM_DEPRESSION		70	-0.265952	-1.04634	0.403259	0.747303	1	4715	tags=30%, list=24%, signal=39%
KEGG_PANCREATIC_CANCER	KEGG_PANCREATIC_CANCER		70	-0.28445	-1.03537	0.419355	0.756667	1	4780	tags=41%, list=24%, signal=55%
KEGG_FOCAL_ADHESION	KEGG_FOCAL_ADHESION		199	-0.253841	-1.01412	0.412	0.787308	1	5600	tags=37%, list=29%, signal=51%
KEGG_SMALL_CELL_LUNG_CANCER	KEGG_SMALL_CELL_LUNG_CANCER		84	-0.277927	-1.01391	0.435318	0.774786	1	5600	tags=42%, list=29%, signal=58%
KEGG_HEDGEHOG_SIGNALING_PATHWAY	KEGG_HEDGEHOG_SIGNALING_PATHWAY		56	-0.272004	-1.01374	0.432	0.762427	1	1620	tags=13%, list=8%, signal=14%
KEGG_N_GLYCAN_BIOSYNTHESIS	KEGG_N_GLYCAN_BIOSYNTHESIS		46	-0.305398	-1.01262	0.429134	0.752602	1	7425	tags=50%, list=38%, signal=80%
KEGG_NEUROTROPHIN_SIGNALING_PATHWAY	KEGG_NEUROTROPHIN_SIGNALING_PATHWAY		126	-0.253295	-1.00736	0.457661	0.751554	1	4641	tags=33%, list=24%, signal=43%
KEGG_PEROXISOME	KEGG_PEROXISOME		78	-0.307627	-1.00584	0.434615	0.743055	1	5099	tags=40%, list=26%, signal=53%
KEGG_BIOSYNTHESIS_OF_UNSATURATED_FATTY_ACIDS	KEGG_BIOSYNTHESIS_OF_UNSATURATED_FATTY_ACIDS		22	-0.32555	-0.993632	0.448207	0.754977	1	3307	tags=27%, list=17%, signal=33%
KEGG_GLYCOSAMINOGLYCAN_BIOSYNTHESIS_HEPARAN_SULFATE	KEGG_GLYCOSAMINOGLYCAN_BIOSYNTHESIS_HEPARAN_SULFATE		26	-0.315781	-0.989966	0.470103	0.750846	1	5345	tags=35%, list=27%, signal=47%
KEGG_ALANINE_ASPARTATE_AND_GLUTAMATE_METABOLISM	KEGG_ALANINE_ASPARTATE_AND_GLUTAMATE_METABOLISM		32	-0.326725	-0.982653	0.44466	0.753769	1	6609	tags=47%, list=34%, signal=71%
KEGG_PURINE_METABOLISM	KEGG_PURINE_METABOLISM		156	-0.21189	-0.96945	0.497018	0.769152	1	7740	tags=50%, list=39%, signal=82%
KEGG_MISMATCH_REPAIR	KEGG_MISMATCH_REPAIR		23	-0.354271	-0.966613	0.513238	0.763051	1	2613	tags=26%, list=13%, signal=30%
KEGG_SPLICEOSOME	KEGG_SPLICEOSOME		126	-0.274206	-0.939237	0.515712	0.806968	1	4882	tags=34%, list=25%, signal=45%
KEGG_VASCULAR_SMOOTH_MUSCLE_CONTRACTION	KEGG_VASCULAR_SMOOTH_MUSCLE_CONTRACTION		115	-0.229407	-0.936054	0.507071	0.802207	1	4010	tags=23%, list=20%, signal=28%
KEGG_HUNTINGTONS_DISEASE	KEGG_HUNTINGTONS_DISEASE		177	-0.269078	-0.934416	0.518	0.79428	1	6147	tags=38%, list=31%, signal=55%
KEGG_BASAL_CELL_CARCINOMA	KEGG_BASAL_CELL_CARCINOMA		55	-0.254725	-0.929423	0.553785	0.793018	1	8129	tags=47%, list=41%, signal=80%
KEGG_AXON_GUIDANCE	KEGG_AXON_GUIDANCE		129	-0.228008	-0.91994	0.565657	0.801187	1	4518	tags=26%, list=23%, signal=33%
KEGG_ALZHEIMERS_DISEASE	KEGG_ALZHEIMERS_DISEASE		163	-0.258697	-0.912028	0.519685	0.805971	1	2962	tags=21%, list=15%, signal=24%
KEGG_GLYCOLYSIS_GLUCONEOGENESIS	KEGG_GLYCOLYSIS_GLUCONEOGENESIS		62	-0.27828	-0.90923	0.544031	0.800462	1	8645	tags=50%, list=44%, signal=89%
KEGG_PPAR_SIGNALING_PATHWAY	KEGG_PPAR_SIGNALING_PATHWAY		69	-0.273166	-0.907141	0.570565	0.793974	1	8679	tags=58%, list=44%, signal=103%
KEGG_ARGININE_AND_PROLINE_METABOLISM	KEGG_ARGININE_AND_PROLINE_METABOLISM		54	-0.260548	-0.885546	0.612284	0.82331	1	6494	tags=43%, list=33%, signal=63%
KEGG_BETA_ALANINE_METABOLISM	KEGG_BETA_ALANINE_METABOLISM		22	-0.315447	-0.8848	0.595825	0.814379	1	6027	tags=45%, list=31%, signal=65%
KEGG_EPITHELIAL_CELL_SIGNALING_IN_HELICOBACTER_PYLORI_INFECTION	KEGG_EPITHELIAL_CELL_SIGNALING_IN_HELICOBACTER_PYLORI_INFECTION		68	-0.2342	-0.878018	0.626747	0.816158	1	5572	tags=40%, list=28%, signal=55%
KEGG_DORSO_VENTRAL_AXIS_FORMATION	KEGG_DORSO_VENTRAL_AXIS_FORMATION		24	-0.288104	-0.87637	0.638171	0.809046	1	3247	tags=29%, list=17%, signal=35%
KEGG_ETHER_LIPID_METABOLISM	KEGG_ETHER_LIPID_METABOLISM		33	-0.249923	-0.868652	0.649895	0.813861	1	4178	tags=27%, list=21%, signal=35%
KEGG_HYPERTROPHIC_CARDIOMYOPATHY_HCM	KEGG_HYPERTROPHIC_CARDIOMYOPATHY_HCM		83	-0.226584	-0.868163	0.665354	0.804994	1	7808	tags=45%, list=40%, signal=74%
KEGG_NOTCH_SIGNALING_PATHWAY	KEGG_NOTCH_SIGNALING_PATHWAY		47	-0.258593	-0.865736	0.567729	0.80002	1	4554	tags=32%, list=23%, signal=41%
KEGG_GLYCEROLIPID_METABOLISM	KEGG_GLYCEROLIPID_METABOLISM		48	-0.228743	-0.865586	0.669216	0.79085	1	5522	tags=35%, list=28%, signal=49%
KEGG_ECM_RECEPTOR_INTERACTION	KEGG_ECM_RECEPTOR_INTERACTION		84	-0.245162	-0.850664	0.614786	0.808336	1	7094	tags=40%, list=36%, signal=63%
KEGG_PROTEIN_EXPORT	KEGG_PROTEIN_EXPORT		23	-0.310705	-0.839337	0.644231	0.817808	1	3104	tags=26%, list=16%, signal=31%
KEGG_NICOTINATE_AND_NICOTINAMIDE_METABOLISM	KEGG_NICOTINATE_AND_NICOTINAMIDE_METABOLISM		24	-0.24326	-0.826982	0.730845	0.830521	1	2965	tags=25%, list=15%, signal=29%
KEGG_HISTIDINE_METABOLISM	KEGG_HISTIDINE_METABOLISM		29	-0.251152	-0.781156	0.724409	0.898271	1	9100	tags=66%, list=46%, signal=122%
KEGG_PANTOTHENATE_AND_COA_BIOSYNTHESIS	KEGG_PANTOTHENATE_AND_COA_BIOSYNTHESIS		16	-0.255654	-0.778764	0.75	0.892148	1	2718	tags=13%, list=14%, signal=14%
KEGG_CALCIUM_SIGNALING_PATHWAY	KEGG_CALCIUM_SIGNALING_PATHWAY		177	-0.178555	-0.773162	0.84898	0.891352	1	3643	tags=18%, list=19%, signal=21%
KEGG_GLYCOSAMINOGLYCAN_DEGRADATION	KEGG_GLYCOSAMINOGLYCAN_DEGRADATION		21	-0.24381	-0.754834	0.775681	0.910525	1	6380	tags=38%, list=32%, signal=56%
KEGG_STARCH_AND_SUCROSE_METABOLISM	KEGG_STARCH_AND_SUCROSE_METABOLISM		51	-0.233672	-0.749711	0.796178	0.909017	1	9723	tags=59%, list=49%, signal=116%
KEGG_PENTOSE_AND_GLUCURONATE_INTERCONVERSIONS	KEGG_PENTOSE_AND_GLUCURONATE_INTERCONVERSIONS		28	-0.285263	-0.735038	0.770701	0.920797	1	8600	tags=50%, list=44%, signal=89%
KEGG_BLADDER_CANCER	KEGG_BLADDER_CANCER		42	-0.193988	-0.725203	0.888211	0.926109	1	6615	tags=48%, list=34%, signal=72%
KEGG_DILATED_CARDIOMYOPATHY	KEGG_DILATED_CARDIOMYOPATHY		90	-0.190766	-0.724495	0.860606	0.917588	1	6754	tags=34%, list=34%, signal=52%
KEGG_ASCORBATE_AND_ALDARATE_METABOLISM	KEGG_ASCORBATE_AND_ALDARATE_METABOLISM		25	-0.294697	-0.718286	0.796258	0.916824	1	8600	tags=56%, list=44%, signal=99%
KEGG_RETINOL_METABOLISM	KEGG_RETINOL_METABOLISM		64	-0.278444	-0.714816	0.866667	0.912329	1	9176	tags=56%, list=47%, signal=105%
KEGG_RENIN_ANGIOTENSIN_SYSTEM	KEGG_RENIN_ANGIOTENSIN_SYSTEM		16	-0.241055	-0.676006	0.853659	0.952261	1	9210	tags=56%, list=47%, signal=106%
KEGG_TASTE_TRANSDUCTION	KEGG_TASTE_TRANSDUCTION		51	-0.226094	-0.675867	0.791411	0.942936	1	8887	tags=55%, list=45%, signal=100%
KEGG_TRYPTOPHAN_METABOLISM	KEGG_TRYPTOPHAN_METABOLISM		40	-0.208973	-0.673105	0.889113	0.93686	1	2231	tags=18%, list=11%, signal=20%
KEGG_RNA_POLYMERASE	KEGG_RNA_POLYMERASE		29	-0.204231	-0.671519	0.861111	0.929556	1	7432	tags=48%, list=38%, signal=78%
KEGG_TYROSINE_METABOLISM	KEGG_TYROSINE_METABOLISM		42	-0.214175	-0.666055	0.940711	0.926831	1	9025	tags=57%, list=46%, signal=105%
KEGG_PHENYLALANINE_METABOLISM	KEGG_PHENYLALANINE_METABOLISM		18	-0.232728	-0.664586	0.910714	0.919612	1	3611	tags=17%, list=18%, signal=20%
KEGG_PRIMARY_BILE_ACID_BIOSYNTHESIS	KEGG_PRIMARY_BILE_ACID_BIOSYNTHESIS		16	-0.295593	-0.656109	0.907071	0.919372	1	9010	tags=75%, list=46%, signal=138%
KEGG_PENTOSE_PHOSPHATE_PATHWAY	KEGG_PENTOSE_PHOSPHATE_PATHWAY		26	-0.181013	-0.584399	0.963601	0.975721	1	1618	tags=8%, list=8%, signal=8%
KEGG_STEROID_HORMONE_BIOSYNTHESIS	KEGG_STEROID_HORMONE_BIOSYNTHESIS		55	-0.207093	-0.572591	0.964509	0.974575	1	9238	tags=56%, list=47%, signal=106%
KEGG_OXIDATIVE_PHOSPHORYLATION	KEGG_OXIDATIVE_PHOSPHORYLATION		129	-0.208638	-0.541741	0.818898	0.983648	1	6147	tags=33%, list=31%, signal=48%
KEGG_CARDIAC_MUSCLE_CONTRACTION	KEGG_CARDIAC_MUSCLE_CONTRACTION		77	-0.158546	-0.520569	0.968	0.983709	1	7141	tags=32%, list=36%, signal=51%
KEGG_DRUG_METABOLISM_CYTOCHROME_P450	KEGG_DRUG_METABOLISM_CYTOCHROME_P450		70	-0.170386	-0.464036	0.991667	0.993315	1	9176	tags=51%, list=47%, signal=96%
KEGG_METABOLISM_OF_XENOBIOTICS_BY_CYTOCHROME_P450	KEGG_METABOLISM_OF_XENOBIOTICS_BY_CYTOCHROME_P450		68	-0.122132	-0.339859	1	0.998142	1	9176	tags=47%, list=47%, signal=88%
